# Supplementary material for: Distinct states of nucleolar stress induced by anti-cancer drugs
Source: bioRxiv preprint, doi:10.1101/2022.11.18.517150, version 3 (2023-09-05)
Supplement: Supplementary Table 2 [file 517150_file03.xlsx]

## Sheet: Common enriched and depleted
Number	NCBI_Gene	Flavo/Untreated:QPROT:LogFoldChange	AZD4573/Untreated:QPROT:LogFoldChange	Description
Proteins enriched in both Flavopiridol and AZD4573
1	TP53	19.354	18.785	TP53.NP_001119584.1:cellular tumor antigen p53 isoform a NP_001119590.1:cellular tumor antigen p53 isoform g
2	LMO7	18.55	17.78	LIM domain only protein 7 isoform 1
3	SUMO1	18.521	17.818	SUMO1.NP_001358321.1:small ubiquitin-related modifier 1 isoform d NP_001358323.1:small ubiquitin-related modifier 1 isoform c NP_003343.1:small ubiquitin-related modifier 1 isoform a precursor
4	COPS9	18.443	19.404	COP9 signalosome complex subunit 9 isoform 2
5	ATP6V1G1	18.357	18.124	V-type proton ATPase subunit G 1
6	RPS29	18.299	18.545	RPS29.NP_001023.1:40S ribosomal protein S29 isoform 1 NP_001338304.1:40S ribosomal protein S29 isoform 3
7	PFN2	18.232	18.285	profilin-2 isoform a
8	APOBEC3C	18.151	17.383	DNA dC- dU-editing enzyme APOBEC-3C
9	YAF2	17.876	18.105	YAF2.NP_001177908.1:YY1-associated factor 2 isoform 1 NP_005739.2:YY1-associated factor 2 isoform 2
10	CCNH	17.849	16.208	CCNH.NP_001230.1:cyclin-H isoform 1 NP_001350468.1:cyclin-H isoform 3 NP_001351004.1:cyclin-H isoform 4
11	LYRM4	17.829	17.73	LYR motif-containing protein 4 isoform 1
12	MGST1	17.795	17.888	microsomal glutathione S-transferase 1 isoform a
13	TST	17.791	17.468	thiosulfate sulfurtransferase
14	ARMCX3	17.788	17.765	armadillo repeat-containing X-linked protein 3
15	CCDC115	17.597	17.734	CCDC115.NP_001308048.2:coiled-coil domain-containing protein 115 isoform d NP_115733.2:coiled-coil domain-containing protein 115 isoform a
16	TMED5	17.593	17.135	transmembrane emp24 domain-containing protein 5 isoform 1 precursor
17	POLD2	17.577	17.396	POLD2.NP_001243808.1:DNA polymerase delta subunit 2 isoform 1 NP_006221.2:DNA polymerase delta subunit 2 isoform 2
18	ZNF330	17.548	16.899	ZNF330.NP_001278931.1:zinc finger protein 330 isoform 2 NP_055302.1:zinc finger protein 330 isoform 1
19	TMEM41B	17.483	17.954	TMEM41B.NP_001158502.1:transmembrane protein 41B isoform 2 NP_055827.1:transmembrane protein 41B isoform 1
20	FECH	17.458	17.821	FECH.NP_000131.2:ferrochelatase, mitochondrial isoform b precursor NP_001012533.1:ferrochelatase, mitochondrial isoform a precursor NP_001358023.1:ferrochelatase, mitochondrial isoform c
21	NAPA	17.428	16.976	alpha-soluble NSF attachment protein
22	MRPS10	17.416	17.284	28S ribosomal protein S10, mitochondrial
23	CD2BP2	17.387	17.735	CD2 antigen cytoplasmic tail-binding protein 2
24	UCK2	17.24	16.996	UCK2.NP_001350497.1:uridine-cytidine kinase 2 isoform 2 NP_036606.2:uridine-cytidine kinase 2 isoform 1
25	CASP4	17.198	17.056	caspase-4 isoform alpha precursor
26	WDR12	17.149	17.424	ribosome biogenesis protein WDR12 isoform 1
27	C5orf24	17.09	17.018	UPF0461 protein C5orf24 isoform 1
28	CKAP2	17.04	18.027	CKAP2.NP_001091995.1:cytoskeleton-associated protein 2 isoform 2 NP_001273615.1:cytoskeleton-associated protein 2 isoform 3 NP_060674.3:cytoskeleton-associated protein 2 isoform 1
29	CENPQ	17.037	17.647	centromere protein Q
30	CCDC97	17.032	17.301	coiled-coil domain-containing protein 97 isoform 2
31	UBLCP1	16.969	16.695	ubiquitin-like domain-containing CTD phosphatase 1
32	TP53RK	16.966	17.397	EKC/KEOPS complex subunit TP53RK
33	CHMP4A	16.9	17.678	charged multivesicular body protein 4a
34	TAF7	16.882	16.402	transcription initiation factor TFIID subunit 7
35	UQCC1	16.875	17.693	UQCC1.NP_001171906.1:ubiquinol-cytochrome-c reductase complex assembly factor 1 isoform c NP_060714.3:ubiquinol-cytochrome-c reductase complex assembly factor 1 isoform a NP_955781.2:ubiquinol-cytochrome-c reductase complex assembly factor 1 isoform b
36	ABHD12	16.859	16.979	ABHD12.NP_001035937.1:lysophosphatidylserine lipase ABHD12 isoform a NP_056415.1:lysophosphatidylserine lipase ABHD12 isoform b
37	WDR4	16.834	17.622	tRNA (guanine-N(7)-)-methyltransferase non-catalytic subunit WDR4 isoform 1
38	COQ9	16.721	17.159	ubiquinone biosynthesis protein COQ9, mitochondrial precursor
39	IMPAD1	16.649	16.362	Golgi-resident adenosine 3',5'-bisphosphate 3'-phosphatase
40	MRPS2	16.605	17.234	28S ribosomal protein S2, mitochondrial
41	SMN1	16.589	17.269	SMN1.NP_000335.1:survival motor neuron protein isoform d NP_001284644.1:survival motor neuron protein isoform a
42	CTDP1	16.562	16.991	CTDP1.NP_001189433.1:RNA polymerase II subunit A C-terminal domain phosphatase isoform 3 NP_004706.3:RNA polymerase II subunit A C-terminal domain phosphatase isoform 1
43	NFYC	16.396	16.658	NFYC.NP_001295043.1:nuclear transcription factor Y subunit gamma isoform 6 NP_001295044.1:nuclear transcription factor Y subunit gamma isoform 7
44	BARD1	16.382	15.926	BARD1.NP_000456.2:BRCA1-associated RING domain protein 1 isoform 1 NP_001269472.1:BRCA1-associated RING domain protein 1 isoform 2
45	CCNB1	16.331	17.655	G2/mitotic-specific cyclin-B1 isoform 3
46	FANCI	16.322	16.062	FANCI.NP_001106849.1:Fanconi anemia group I protein isoform 1 NP_060663.2:Fanconi anemia group I protein isoform 2
47	GABPB1	16.294	17.383	GABPB1.NP_001307844.1:GA-binding protein subunit beta-1 isoform 5 NP_002032.2:GA-binding protein subunit beta-1 isoform gamma 1 NP_005245.2:GA-binding protein subunit beta-1 isoform beta 1 NP_057738.1:GA-binding protein subunit beta-1 isoform beta 2 NP_057739.1:GA-binding protein subunit beta-1 isoform gamma 2
48	SEC61A1	16.27	16.536	protein transport protein Sec61 subunit alpha isoform 1
49	BRAT1	16.259	16.862	BRAT1.NP_001337556.1:BRCA1-associated ATM activator 1 isoform 3 NP_689956.2:BRCA1-associated ATM activator 1 isoform 2
50	MYBL2	16.205	16.125	myb-related protein B isoform 1
51	ZSCAN18	16.186	16.21	ZSCAN18.NP_001139014.1:zinc finger and SCAN domain-containing protein 18 isoform 1 NP_001139015.1:zinc finger and SCAN domain-containing protein 18 isoform 3
52	SIL1	16.166	16.754	nucleotide exchange factor SIL1 precursor
53	XPO6	16.082	16.418	XPO6.NP_001257869.1:exportin-6 isoform 1 NP_055986.1:exportin-6 isoform 2
54	MCCC1	16.08	16.208	MCCC1.NP_001280202.1:methylcrotonoyl-CoA carboxylase subunit alpha, mitochondrial isoform 2 NP_001350809.1:methylcrotonoyl-CoA carboxylase subunit alpha, mitochondrial isoform 3 NP_064551.3:methylcrotonoyl-CoA carboxylase subunit alpha, mitochondrial isoform 1 precursor
55	HSPA2	16.061	15.42	heat shock-related 70 kDa protein 2
56	AVL9	16.026	15.981	late secretory pathway protein AVL9 homolog
57	TEAD4	15.997	16.494	transcriptional enhancer factor TEF-3 isoform 1
58	CASC5	15.806	14.683	KNL1.NP_653091.3:kinetochore scaffold 1 isoform 2 NP_733468.3:kinetochore scaffold 1 isoform 1
59	TBL1X	15.786	16.256	F-box-like/WD repeat-containing protein TBL1X isoform b
60	COL4A3BP	15.669	15.654	CERT1.NP_001123577.1:ceramide transfer protein isoform 3 NP_005704.1:ceramide transfer protein isoform 1 NP_112729.1:ceramide transfer protein isoform 2
61	ZMIZ1	15.563	15.885	zinc finger MIZ domain-containing protein 1
Proteins depleted in both Flavopiridol and AZD4573
1	POLDIP3	-1.53	-1.836	Polymerase delta-interacting protein 3 isoform 3 NP_115687.2:polymerase delta-interacting protein 3 isoform 1
2	NAA30	-16.737	-16.776	N-alpha-acetyltransferase 30
3	ZFP36L2	-16.807	-16.796	mRNA decay activator protein ZFP36L2
4	FYTTD1	-16.993	-17.01	FYTTD1.NP_001011537.2:UAP56-interacting factor isoform 2 NP_115664.2:UAP56-interacting factor isoform 1
5	RND3	-17.202	-17.186	rho-related GTP-binding protein RhoE precursor
6	HDDC2	-17.5	-17.48	HD domain-containing protein 2
7	CYR61	-17.232	-17.429	CCN family member 1 precursor
8	DDX56	-17.764	-17.752	DDX56.NP_001244118.1:probable ATP-dependent RNA helicase DDX56 isoform 2 NP_061955.1:probable ATP-dependent RNA helicase DDX56 isoform 1
9	FOSL2	-17.363	-17.362	fos-related antigen 2
10	RRP36	-17.932	-17.896	RRP36.NP_001316633.1:ribosomal RNA processing protein 36 homolog isoform 2 NP_149103.1:ribosomal RNA processing protein 36 homolog isoform 1
11	UAP1	-16.115	-17.883	UDP-N-acetylhexosamine pyrophosphorylase isoform b
12	ZCCHC9	-18.258	-18.236	zinc finger CCHC domain-containing protein 9
13	RPF1	-18.79	-18.801	ribosome production factor 1
14	AFF4	-15.425	-15.414	AF4/FMR2 family member 4
15	DMXL2	-15.228	-15.076	DMXL2.NP_001167587.1:dmX-like protein 2 isoform 1 NP_056078.2:dmX-like protein 2 isoform 2
16	RREB1	-15.602	-15.625	RREB1.NP_001003698.1:ras-responsive element-binding protein 1 isoform 2 NP_001003699.1:ras-responsive element-binding protein 1 isoform 1 NP_001003700.1:ras-responsive element-binding protein 1 isoform 3
17	FER	-15.786	-15.791	tyrosine-protein kinase Fer isoform a
18	BCL6	-15.945	-15.926	B-cell lymphoma 6 protein isoform 1
19	ZXDC	-16.106	-16.063	ZXDC.NP_001035743.1:zinc finger protein ZXDC isoform 2 NP_079388.3:zinc finger protein ZXDC isoform 1
20	CCDC174	-16.342	-16.371	coiled-coil domain-containing protein 174
21	WDR59	-16.335	-16.321	GATOR complex protein WDR59 isoform 2 NP_001311101.1:GATOR complex protein WDR59 isoform 3 NP_085058.3:GATOR complex protein WDR59 isoform 1
22	NSUN6	-16.49	-16.763	NSUN6.NP_001338044.1:tRNA (cytosine(72)-C(5))-methyltransferase NSUN6 isoform 2 NP_001338045.1:tRNA (cytosine(72)-C(5))-methyltransferase NSUN6 isoform 3 NP_872349.1:tRNA (cytosine(72)-C(5))-methyltransferase NSUN6 isoform 1

## Sheet: Flavopiridol FDR<0.05
Number	NCBI_Gene	Untreated dNSAF AVG	Flavo dNSAF AVG	Flavo/Untreated:QPROT:LogFoldChange	Flavo/Untreated:QPROT:fdr	Flavo/Untreated:QPROT:FDRup	Flavo/Untreated:QPROT:FDRdown	Description
	Enriched in Flavopiridol
1	TP53	0	0.000265	19.354	0	0	0.82888	TP53.NP_001119584.1:cellular tumor antigen p53 isoform a NP_001119590.1:cellular tumor antigen p53 isoform g
2	LMO7	0	0.000132	18.55	0	0	0.842568	LIM domain only protein 7 isoform 1
3	SUMO1	0	0.000127	18.521	0	0	0.842475	SUMO1.NP_001358321.1:small ubiquitin-related modifier 1 isoform d NP_001358323.1:small ubiquitin-related modifier 1 isoform c NP_003343.1:small ubiquitin-related modifier 1 isoform a precursor
4	ENY2	0	0.000119	18.474	0	0	0.839428	ENY2.NP_001180486.1:transcription and mRNA export factor ENY2 isoform 2 NP_064574.1:transcription and mRNA export factor ENY2 isoform 1
5	COPS9	0	0.000109	18.443	0	0	0.833419	COP9 signalosome complex subunit 9 isoform 2
6	TPD52L2	0	0.000111	18.433	0	0	0.845957	tumor protein D54 isoform f
7	ATP6V1G1	0	0.000105	18.357	0	0	0.844012	V-type proton ATPase subunit G 1
8	RPS29	0	9e-05	18.299	0	0	0.827666	RPS29.NP_001023.1:40S ribosomal protein S29 isoform 1 NP_001338304.1:40S ribosomal protein S29 isoform 3
9	PFN2	0	9.6e-05	18.232	0	0	0.841133	profilin-2 isoform a
10	ZRANB2	0	8.9e-05	18.217	0	0	0.838645	ZRANB2.NP_005446.2:zinc finger Ran-binding domain-containing protein 2 isoform 2 NP_976225.1:zinc finger Ran-binding domain-containing protein 2 isoform 1
11	ACTN4	0	8.3e-05	18.175	0	0	0.832136	alpha-actinin-4 isoform 1
12	APOBEC3C	0	8.6e-05	18.151	0	0	0.840123	DNA dC- dU-editing enzyme APOBEC-3C
13	PSMG1	0	7.2e-05	17.98	0	0	0.837632	PSMG1.NP_001248753.1:proteasome assembly chaperone 1 isoform 3 NP_001307724.1:proteasome assembly chaperone 1 isoform d NP_003711.1:proteasome assembly chaperone 1 isoform a NP_982257.1:proteasome assembly chaperone 1 isoform b
14	YAF2	0	6.2e-05	17.876	0	0	0.833332	YAF2.NP_001177908.1:YY1-associated factor 2 isoform 1 NP_005739.2:YY1-associated factor 2 isoform 2
15	CCNH	0	5.8e-05	17.849	0	0	0.828925	CCNH.NP_001230.1:cyclin-H isoform 1 NP_001350468.1:cyclin-H isoform 3 NP_001351004.1:cyclin-H isoform 4
16	LYRM4	0	5.5e-05	17.829	0	0	0.832478	LYR motif-containing protein 4 isoform 1
17	MGST1	0	5.7e-05	17.795	0	0	0.835199	microsomal glutathione S-transferase 1 isoform a
18	TST	0	5.9e-05	17.791	0	0	0.838263	thiosulfate sulfurtransferase
19	ARMCX3	0	5.7e-05	17.788	0	0	0.830655	armadillo repeat-containing X-linked protein 3
20	RPL37	0	5.2e-05	17.714	0	0	0.829257	60S ribosomal protein L37
21	CD9	0	5.4e-05	17.701	0	0	0.84184	CD9.NP_001317241.1:CD9 antigen isoform 2 NP_001760.1:CD9 antigen isoform 1
22	CCDC115	0	4.4e-05	17.597	0	0	0.830576	CCDC115.NP_001308048.2:coiled-coil domain-containing protein 115 isoform d NP_115733.2:coiled-coil domain-containing protein 115 isoform a
23	TMED5	0	4.4e-05	17.593	0	0	0.827983	transmembrane emp24 domain-containing protein 5 isoform 1 precursor
24	POLD2	0	4.5e-05	17.577	0	0	0.833382	POLD2.NP_001243808.1:DNA polymerase delta subunit 2 isoform 1 NP_006221.2:DNA polymerase delta subunit 2 isoform 2
25	NDUFA8	0	4.4e-05	17.556	0	0	0.828315	NADH dehydrogenase [ubiquinone] 1 alpha subcomplex subunit 8 isoform 1
26	COMMD4	0	4.5e-05	17.549	0	0	0.835516	COMMD4.NP_001271306.1:COMM domain-containing protein 4 isoform 2 NP_001271307.1:COMM domain-containing protein 4 isoform 3 NP_001271308.1:COMM domain-containing protein 4 isoform 4 NP_001308773.1:COMM domain-containing protein 4 isoform 5 NP_001308774.1:COMM domain-containing protein 4 isoform 6 NP_001308775.1:COMM domain-containing protein 4 isoform 7 NP_001308776.1:COMM domain-containing protei…
27	ZNF330	0	4.3e-05	17.548	0	0	0.833005	ZNF330.NP_001278931.1:zinc finger protein 330 isoform 2 NP_055302.1:zinc finger protein 330 isoform 1
28	SELM	0	4.4e-05	17.546	0	0	0.840387	selenoprotein M precursor
29	TMEM41B	0	4e-05	17.483	0	0	0.830074	TMEM41B.NP_001158502.1:transmembrane protein 41B isoform 2 NP_055827.1:transmembrane protein 41B isoform 1
30	FECH	0	3.8e-05	17.458	0	0	0.828742	FECH.NP_000131.2:ferrochelatase, mitochondrial isoform b precursor NP_001012533.1:ferrochelatase, mitochondrial isoform a precursor NP_001358023.1:ferrochelatase, mitochondrial isoform c
31	NAPA	0	3.8e-05	17.428	0	0	0.831211	alpha-soluble NSF attachment protein
32	MRPS10	0	3.7e-05	17.416	0	0	0.834889	28S ribosomal protein S10, mitochondrial
33	NOL10	0	3.8e-05	17.41	0	0	0.837922	NOL10.NP_001248321.1:nucleolar protein 10 isoform 2 NP_001248323.1:nucleolar protein 10 isoform 3 NP_079170.2:nucleolar protein 10 isoform 1
34	TMED4	0	4.1e-05	17.394	0	0	0.843708	transmembrane emp24 domain-containing protein 4 isoform 2 precursor
35	CD2BP2	0	5.2e-05	17.387	0	0	0.84654	CD2 antigen cytoplasmic tail-binding protein 2
36	MPG	0	3.4e-05	17.317	0	0	0.831141	MPG.NP_001015052.1:DNA-3-methyladenine glycosylase isoform b NP_001015054.1:DNA-3-methyladenine glycosylase isoform c NP_002425.2:DNA-3-methyladenine glycosylase isoform a
37	RHEB	0	3.4e-05	17.298	0	0	0.832668	GTP-binding protein Rheb
38	HSPE1-MOB4	0	3.4e-05	17.286	0	0	0.83424	HSPE1-MOB4 protein
39	NT5C	0	3.8e-05	17.283	0	0	0.843827	5'(3')-deoxyribonucleotidase, cytosolic type isoform 1
40	TWSG1	0	4e-05	17.273	0	0	0.84582	twisted gastrulation protein homolog 1 precursor
41	SOAT1	0	3.5e-05	17.248	0	0	0.84066	sterol O-acyltransferase 1 isoform 1
42	UCK2	0	3.7e-05	17.24	0	0	0.842644	UCK2.NP_001350497.1:uridine-cytidine kinase 2 isoform 2 NP_036606.2:uridine-cytidine kinase 2 isoform 1
43	PDK1	0	3e-05	17.207	0	0	0.82794	PDK1.NP_001265478.1:[Pyruvate dehydrogenase (acetyl-transferring)] kinase isozyme 1, mitochondrial isoform 1 precursor NP_002601.1:[Pyruvate dehydrogenase (acetyl-transferring)] kinase isozyme 1, mitochondrial isoform 2 precursor
44	CASP4	0	3e-05	17.198	0	0	0.830491	caspase-4 isoform alpha precursor
45	TIA1	0	2.9e-05	17.158	0	0	0.836672	nucleolysin TIA-1 isoform p40 isoform 3
46	WDR12	0	3.3e-05	17.149	0	0	0.844154	ribosome biogenesis protein WDR12 isoform 1
47	C5orf24	0	2.7e-05	17.09	0	0	0.828762	UPF0461 protein C5orf24 isoform 1
48	CKAP2	0	2.6e-05	17.04	0	0	0.834037	CKAP2.NP_001091995.1:cytoskeleton-associated protein 2 isoform 2 NP_001273615.1:cytoskeleton-associated protein 2 isoform 3 NP_060674.3:cytoskeleton-associated protein 2 isoform 1
49	CENPQ	0	2.8e-05	17.037	0	0	0.841815	centromere protein Q
50	CCDC97	0	3.1e-05	17.032	0	0	0.845248	coiled-coil domain-containing protein 97 isoform 2
51	EXOSC9	0	2.5e-05	16.999	0	0	0.830801	EXOSC9.NP_001029366.1:exosome complex component RRP45 isoform 1 NP_005024.2:exosome complex component RRP45 isoform 2
52	TMED7-TICAM2	0	2.5e-05	16.979	0	0	0.831873	2 genes:TMED7,TMED7-TICAM2.NP_001157940.1:TRAM adaptor with GOLD domain isoform 1 precursor NP_001157941.1:TRAM adaptor with GOLD domain isoform 2 precursor NP_861974.1:transmembrane emp24 domain-containing protein 7 precursor
53	UBLCP1	0	2.8e-05	16.969	0	0	0.843299	ubiquitin-like domain-containing CTD phosphatase 1
54	TP53RK	0	2.5e-05	16.966	0	0	0.838249	EKC/KEOPS complex subunit TP53RK
55	BCKDK	0	2.7e-05	16.928	0	0	0.844672	BCKDK.NP_001116429.1:[3-methyl-2-oxobutanoate dehydrogenase [lipoamide]] kinase, mitochondrial isoform b precursor NP_005872.2:[3-methyl-2-oxobutanoate dehydrogenase [lipoamide]] kinase, mitochondrial isoform a precursor
56	CHMP4A	0	2.3e-05	16.9	0	0	0.832315	charged multivesicular body protein 4a
57	AAED1	0	2.2e-05	16.897	0	0	0.82956	peroxiredoxin-like 2C
58	TAF7	0	2.6e-05	16.882	0	0	0.844002	transcription initiation factor TFIID subunit 7
59	UQCC1	0	2.2e-05	16.875	0	0	0.828287	UQCC1.NP_001171906.1:ubiquinol-cytochrome-c reductase complex assembly factor 1 isoform c NP_060714.3:ubiquinol-cytochrome-c reductase complex assembly factor 1 isoform a NP_955781.2:ubiquinol-cytochrome-c reductase complex assembly factor 1 isoform b
60	ABHD12	0	2.8e-05	16.859	0	0	0.84716	ABHD12.NP_001035937.1:lysophosphatidylserine lipase ABHD12 isoform a NP_056415.1:lysophosphatidylserine lipase ABHD12 isoform b
61	WDR4	0	2.1e-05	16.834	0	0	0.836054	tRNA (guanine-N(7)-)-methyltransferase non-catalytic subunit WDR4 isoform 1
62	GABPA	0	3.4e-05	16.827	0	0	0.847265	GA-binding protein alpha chain
63	NUP58	0	1.9e-05	16.748	0	0	0.835969	NUP58.NP_001008564.1:nucleoporin p58/p45 isoform b NP_054808.1:nucleoporin p58/p45 isoform a
64	COQ9	0	2e-05	16.721	0	0	0.836035	ubiquinone biosynthesis protein COQ9, mitochondrial precursor
65	SATB1	0	2e-05	16.721	0	0	0.842123	SATB1.NP_001124482.1:DNA-binding protein SATB1 isoform 1 NP_001309800.1:DNA-binding protein SATB1 isoform 2
66	GYG1	0	1.9e-05	16.703	0	0	0.837311	GYG1.NP_001171649.1:glycogenin-1 isoform 2 NP_001171650.1:glycogenin-1 isoform 3 NP_004121.2:glycogenin-1 isoform 1
67	NSUN4	0	1.9e-05	16.693	0	0	0.833897	NSUN4.NP_001243056.1:5-methylcytosine rRNA methyltransferase NSUN4 isoform b NP_950245.2:5-methylcytosine rRNA methyltransferase NSUN4 isoform a
68	IMPAD1	0	1.7e-05	16.649	0	0	0.835058	Golgi-resident adenosine 3',5'-bisphosphate 3'-phosphatase
69	DHCR24	0	1.7e-05	16.614	0	0	0.835708	delta(24)-sterol reductase precursor
70	NAGA	0	2.5e-05	16.608	0	0	0.847641	alpha-N-acetylgalactosaminidase precursor
71	MRPS2	0	1.7e-05	16.605	0	0	0.832188	28S ribosomal protein S2, mitochondrial
72	CYB5R1	0	1.6e-05	16.602	0	0	0.833606	NADH-cytochrome b5 reductase 1
73	SMN1	0	2.1e-05	16.589	0	0	0.847493	SMN1.NP_000335.1:survival motor neuron protein isoform d NP_001284644.1:survival motor neuron protein isoform a
74	MPP6	0	2.1e-05	16.582	0	0	0.846331	MAGUK p55 subfamily member 6
75	ETV1	0	1.7e-05	16.582	0	0	0.833821	ETV1.NP_001156619.1:ETS translocation variant 1 isoform b NP_001156620.1:ETS translocation variant 1 isoform c NP_001156622.1:ETS translocation variant 1 isoform d NP_001156623.1:ETS translocation variant 1 isoform e NP_001357485.1:ETS translocation variant 1 isoform g NP_004947.2:ETS translocation variant 1 isoform a
76	TEX264	0	1.6e-05	16.581	0	0	0.830584	testis-expressed protein 264 isoform 1
77	CTDP1	0	1.8e-05	16.562	0	0	0.843319	CTDP1.NP_001189433.1:RNA polymerase II subunit A C-terminal domain phosphatase isoform 3 NP_004706.3:RNA polymerase II subunit A C-terminal domain phosphatase isoform 1
78	COPS5	0	1.5e-05	16.503	0	0	0.830843	COP9 signalosome complex subunit 5
79	CCDC47	0	1.5e-05	16.475	0	0	0.840881	coiled-coil domain-containing protein 47 precursor
80	LGALS8	0	1.4e-05	16.43	0	0	0.834354	LGALS8.NP_006490.3:galectin-8 isoform a NP_963837.1:galectin-8 isoform b
81	NFYC	0	1.4e-05	16.396	0	0	0.835303	NFYC.NP_001295043.1:nuclear transcription factor Y subunit gamma isoform 6 NP_001295044.1:nuclear transcription factor Y subunit gamma isoform 7
82	TOE1	0	1.5e-05	16.39	0	0	0.842212	target of EGR1 protein 1
83	BARD1	0	1.5e-05	16.382	0	0	0.844031	BARD1.NP_000456.2:BRCA1-associated RING domain protein 1 isoform 1 NP_001269472.1:BRCA1-associated RING domain protein 1 isoform 2
84	CWC27	0	1.3e-05	16.339	0	0	0.830155	CWC27.NP_001284573.1:spliceosome-associated protein CWC27 homolog isoform 2 NP_001284574.1:spliceosome-associated protein CWC27 homolog isoform 3 NP_001304929.1:spliceosome-associated protein CWC27 homolog isoform 4 NP_001351407.1:spliceosome-associated protein CWC27 homolog isoform 5 NP_005860.2:spliceosome-associated protein CWC27 homolog isoform 1
85	CCNB1	0	1.3e-05	16.331	0	0	0.830537	G2/mitotic-specific cyclin-B1 isoform 3
86	FANCI	0	1.3e-05	16.322	0	0	0.841547	FANCI.NP_001106849.1:Fanconi anemia group I protein isoform 1 NP_060663.2:Fanconi anemia group I protein isoform 2
87	GABPB1	0	1.3e-05	16.294	0	0	0.83812	GABPB1.NP_001307844.1:GA-binding protein subunit beta-1 isoform 5 NP_002032.2:GA-binding protein subunit beta-1 isoform gamma 1 NP_005245.2:GA-binding protein subunit beta-1 isoform beta 1 NP_057738.1:GA-binding protein subunit beta-1 isoform beta 2 NP_057739.1:GA-binding protein subunit beta-1 isoform gamma 2
88	SEC61A1	0	1.3e-05	16.27	0	0	0.846214	protein transport protein Sec61 subunit alpha isoform 1
89	BRAT1	0	1.4e-05	16.259	0	0	0.844021	BRAT1.NP_001337556.1:BRCA1-associated ATM activator 1 isoform 3 NP_689956.2:BRCA1-associated ATM activator 1 isoform 2
90	MYBL2	0	1.2e-05	16.205	0	0	0.844648	myb-related protein B isoform 1
91	TM9SF4	0	1.2e-05	16.189	0	0	0.841627	TM9SF4.NP_001350660.1:transmembrane 9 superfamily member 4 isoform 2 NP_055557.2:transmembrane 9 superfamily member 4 isoform 1 precursor
92	ZSCAN18	0	1.1e-05	16.186	0	0	0.835969	ZSCAN18.NP_001139014.1:zinc finger and SCAN domain-containing protein 18 isoform 1 NP_001139015.1:zinc finger and SCAN domain-containing protein 18 isoform 3
93	PTPRE	0	1.2e-05	16.181	0	0	0.845702	PTPRE.NP_001303605.1:receptor-type tyrosine-protein phosphatase epsilon isoform 3 precursor NP_001310284.1:receptor-type tyrosine-protein phosphatase epsilon isoform 4 NP_001310285.1:receptor-type tyrosine-protein phosphatase epsilon isoform 5 NP_006495.1:receptor-type tyrosine-protein phosphatase epsilon isoform 1 precursor NP_569119.1:receptor-type tyrosine-protein phosphatase epsilon isoform 2
94	SIL1	0	1.1e-05	16.166	0	0	0.833999	nucleotide exchange factor SIL1 precursor
95	XPO6	0	1.1e-05	16.082	0	0	0.843768	XPO6.NP_001257869.1:exportin-6 isoform 1 NP_055986.1:exportin-6 isoform 2
96	MCCC1	0	1e-05	16.08	0	0	0.83944	MCCC1.NP_001280202.1:methylcrotonoyl-CoA carboxylase subunit alpha, mitochondrial isoform 2 NP_001350809.1:methylcrotonoyl-CoA carboxylase subunit alpha, mitochondrial isoform 3 NP_064551.3:methylcrotonoyl-CoA carboxylase subunit alpha, mitochondrial isoform 1 precursor
97	HSPA2	0	1e-05	16.061	0	0	0.840521	heat shock-related 70 kDa protein 2
98	WDR70	0	1e-05	16.028	0	0	0.838728	WDR70.NP_001332927.1:WD repeat-containing protein 70 isoform 2 NP_001332928.1:WD repeat-containing protein 70 isoform 3 NP_060504.1:WD repeat-containing protein 70 isoform 1
99	AVL9	0	1e-05	16.026	0	0	0.838769	late secretory pathway protein AVL9 homolog
100	TEAD4	0	1e-05	15.997	0	0	0.839563	transcriptional enhancer factor TEF-3 isoform 1
101	ARNTL	0	9e-06	15.985	0	0	0.833795	ARNTL.NP_001025444.1:aryl hydrocarbon receptor nuclear translocator-like protein 1 isoform b NP_001169.3:aryl hydrocarbon receptor nuclear translocator-like protein 1 isoform a NP_001284651.1:aryl hydrocarbon receptor nuclear translocator-like protein 1 isoform c NP_001338734.1:aryl hydrocarbon receptor nuclear translocator-like protein 1 isoform g NP_001338735.1:aryl hydrocarbon receptor nuclear…
102	KLHL7	0	9e-06	15.949	0	0	0.829331	KLHL7.NP_001026880.2:kelch-like protein 7 isoform 1 NP_061334.4:kelch-like protein 7 isoform 2
103	CROT	0	8e-06	15.859	0	0	0.837107	CROT.NP_001137407.1:peroxisomal carnitine O-octanoyltransferase isoform 1 NP_066974.2:peroxisomal carnitine O-octanoyltransferase isoform 2
104	CHSY1	0	8e-06	15.856	0	0	0.838127	chondroitin sulfate synthase 1 precursor
105	CASC5	0	8e-06	15.806	0	0	0.840687	KNL1.NP_653091.3:kinetochore scaffold 1 isoform 2 NP_733468.3:kinetochore scaffold 1 isoform 1
106	TBL1X	0	8e-06	15.786	0	0	0.840318	F-box-like/WD repeat-containing protein TBL1X isoform b
107	COL4A3BP	0	7e-06	15.669	0	0	0.836155	CERT1.NP_001123577.1:ceramide transfer protein isoform 3 NP_005704.1:ceramide transfer protein isoform 1 NP_112729.1:ceramide transfer protein isoform 2
108	FMR1	0	7e-06	15.648	0	0	0.843219	synaptic functional regulator FMR1 isoform ISO7
109	TTC17	0	6e-06	15.643	0	0	0.833161	TTC17.NP_001363454.1:tetratricopeptide repeat protein 17 isoform 3 NP_001363455.1:tetratricopeptide repeat protein 17 isoform 4 NP_001363456.1:tetratricopeptide repeat protein 17 isoform 5 NP_001363457.1:tetratricopeptide repeat protein 17 isoform 6 NP_060729.2:tetratricopeptide repeat protein 17 isoform 1
110	ZMIZ1	0	6e-06	15.563	0	0	0.838652	zinc finger MIZ domain-containing protein 1
111	EMSY	0	6e-06	15.55	0	0	0.844598	EMSY.NP_001287871.1:BRCA2-interacting transcriptional repressor EMSY isoform 1 NP_001287872.1:BRCA2-interacting transcriptional repressor EMSY isoform 2 NP_001287873.1:BRCA2-interacting transcriptional repressor EMSY isoform 3 NP_064578.2:BRCA2-interacting transcriptional repressor EMSY isoform 4
112	ZNF646	0	5e-06	15.258	0	0	0.845455	zinc finger protein 646
113	NPHP4	0	4e-06	15.039	0	0	0.835337	nephrocystin-4 isoform a
114	HELZ2	0	3e-06	14.954	0	0	0.838769	HELZ2.NP_001032412.2:helicase with zinc finger domain 2 isoform 1 NP_208384.3:helicase with zinc finger domain 2 isoform 2
115	ZNF426	0	6e-06	14.607	0	0	0.847843	zinc finger protein 426 isoform 2
116	RGPD3	0	1e-06	13.943	0	0	0.846963	ranBP2-like and GRIP domain-containing protein 3
117	RGPD8	0	1e-06	13.934	0	0	0.846806	RANBP2-like and GRIP domain-containing protein 8
118	PDPR	9e-06	5.5e-05	1.751	0.014253	0.001756	0.857138	Pyruvate dehydrogenase phosphatase regulatory subunit, mitochondrial
	Depleted in Flavopiridol
1	RPL7L1	0.000374	8.4e-05	-1.501	0.031532	0.855569	0.007332	60S ribosomal protein L7-like 1
2	POLDIP3	0.000224	4.9e-05	-1.53	0.022901	0.85241	0.00484	Polymerase delta-interacting protein 3 isoform 3 NP_115687.2:polymerase delta-interacting protein 3 isoform 1
3	PTMA	0.000236	4.5e-05	-1.634	0.004037	0.843218	0.000437	PTMA.NP_001092755.1:prothymosin alpha isoform 1 NP_002814.3:prothymosin alpha isoform 2
4	C1orf131	2.6e-05	0	-8.495	0.147184	0.884374	0.047251	C1orf131.NP_001287759.1:uncharacterized protein C1orf131 isoform b NP_689592.2:uncharacterized protein C1orf131 isoform a
5	ZNF121	1.9e-05	1e-06	-9.073	0.084032	0.870439	0.024425	zinc finger protein 121
6	DMXL2	6e-06	0	-15.228	0	0.838206	0	DMXL2.NP_001167587.1:dmX-like protein 2 isoform 1 NP_056078.2:dmX-like protein 2 isoform 2
7	RALGAPA1	4e-06	0	-15.236	0	0.833818	0	RALGAPA1.NP_001317004.1:ral GTPase-activating protein subunit alpha-1 isoform 5 NP_001333178.1:ral GTPase-activating protein subunit alpha-1 isoform 8
8	RSF1	5e-06	0	-15.422	0	0.831457	0	remodeling and spacing factor 1
9	AFF4	5e-06	0	-15.425	0	0.832989	0	AF4/FMR2 family member 4
10	RREB1	6e-06	0	-15.602	0	0.827951	0	RREB1.NP_001003698.1:ras-responsive element-binding protein 1 isoform 2 NP_001003699.1:ras-responsive element-binding protein 1 isoform 1 NP_001003700.1:ras-responsive element-binding protein 1 isoform 3
11	FER	7e-06	0	-15.786	0	0.828821	0	tyrosine-protein kinase Fer isoform a
12	CDC42BPA	8e-06	0	-15.854	0	0.832332	0	serine/threonine-protein kinase MRCK alpha isoform D
13	ZBED4	8e-06	0	-15.879	0	0.833125	0	zinc finger BED domain-containing protein 4
14	ZYG11B	8e-06	0	-15.897	0	0.834613	0	protein zyg-11 homolog B
15	NDUFS1	9e-06	0	-15.941	0	0.83096	0	NDUFS1.NP_001186910.1:NADH-ubiquinone oxidoreductase 75 kDa subunit, mitochondrial isoform 2 precursor NP_001186911.1:NADH-ubiquinone oxidoreductase 75 kDa subunit, mitochondrial isoform 3 NP_001186912.1:NADH-ubiquinone oxidoreductase 75 kDa subunit, mitochondrial isoform 4 NP_001186913.1:NADH-ubiquinone oxidoreductase 75 kDa subunit, mitochondrial isoform 5 NP_004997.4:NADH-ubiquinone oxidoreduc…
16	BCL6	9e-06	0	-15.945	0	0.830543	0	B-cell lymphoma 6 protein isoform 1
17	GIGYF1	1e-05	0	-15.955	0	0.836798	0	GIGYF1.NP_001362688.1:GRB10-interacting GYF protein 1 isoform a NP_001362694.1:GRB10-interacting GYF protein 1 isoform b NP_001362696.1:GRB10-interacting GYF protein 1 isoform c NP_001362697.1:GRB10-interacting GYF protein 1 isoform d
18	PATZ1	9e-06	0	-15.962	0	0.833227	0	PATZ1.NP_055138.2:POZ-, AT hook-, and zinc finger-containing protein 1 long C isoform NP_114439.1:POZ-, AT hook-, and zinc finger-containing protein 1 long A isoform NP_114441.1:POZ-, AT hook-, and zinc finger-containing protein 1 long B isoform
19	ANO2	9e-06	0	-15.98	0	0.829576	0	ANO2.NP_001265525.1:anoctamin-2 isoform 1 NP_001265526.1:anoctamin-2 isoform 2 NP_001351720.1:anoctamin-2 isoform 3
20	SOX9	1.3e-05	0	-15.989	0	0.837311	0	3 genes:SOX10,SOX8,SOX9.NP_000337.1:transcription factor SOX-9 NP_008872.1:transcription factor SOX-10 NP_055402.2:transcription factor SOX-8
21	IRGQ	1e-05	0	-16.067	0	0.831559	0	immunity-related GTPase family Q protein
22	ZXDC	1.1e-05	0	-16.106	0	0.834557	0	ZXDC.NP_001035743.1:zinc finger protein ZXDC isoform 2 NP_079388.3:zinc finger protein ZXDC isoform 1
23	UAP1	8.5e-05	0	-16.115	0.002528	0.842076	0.000223	UDP-N-acetylhexosamine pyrophosphorylase isoform b
24	ZNF8	1e-05	0	-16.133	0	0.832453	0	zinc finger protein 8
25	AMOTL2	1.1e-05	0	-16.148	0	0.828986	0	AMOTL2.NP_001265612.1:angiomotin-like protein 2 isoform 1 NP_001265614.1:angiomotin-like protein 2 isoform 3 NP_001350872.1:angiomotin-like protein 2 isoform 4 NP_057285.3:angiomotin-like protein 2 isoform 2
26	GPHN	1.3e-05	0	-16.197	0	0.835416	0	GPHN.NP_001019389.1:gephyrin isoform 2 NP_065857.1:gephyrin isoform 1
27	WDR59	1.4e-05	0	-16.335	0	0.833771	0	WDR59.NP_001311100.1:GATOR complex protein WDR59 isoform 2 NP_001311101.1:GATOR complex protein WDR59 isoform 3 NP_085058.3:GATOR complex protein WDR59 isoform 1
28	CCDC174	1.3e-05	0	-16.342	0	0.832418	0	coiled-coil domain-containing protein 174
29	DTX2	1.4e-05	0	-16.404	0	0.830988	0	DTX2.NP_001096065.1:probable E3 ubiquitin-protein ligase DTX2 isoform a NP_001096066.1:probable E3 ubiquitin-protein ligase DTX2 isoform b
30	NSUN6	1.9e-05	0	-16.49	1e-06	0.838548	0	NSUN6.NP_001338044.1:tRNA (cytosine(72)-C(5))-methyltransferase NSUN6 isoform 2 NP_001338045.1:tRNA (cytosine(72)-C(5))-methyltransferase NSUN6 isoform 3 NP_872349.1:tRNA (cytosine(72)-C(5))-methyltransferase NSUN6 isoform 1
31	FAM171A1	2e-05	0	-16.529	0	0.836802	0	protein FAM171A1 precursor
32	RPRD1A	1.6e-05	0	-16.558	0	0.834284	0	regulation of nuclear pre-mRNA domain-containing protein 1A isoform 1
33	CAMK2G	2.3e-05	0	-16.684	0	0.83621	0	calcium/calmodulin-dependent protein kinase type II subunit gamma isoform 35
34	NAB2	1.9e-05	0	-16.688	0	0.828887	0	NAB2.NP_001317234.1:NGFI-A-binding protein 2 isoform 2 NP_005958.1:NGFI-A-binding protein 2 isoform 1
35	NCK1	1.9e-05	0	-16.715	0	0.831599	0	NCK1.NP_001177725.1:cytoplasmic protein NCK1 isoform 2 NP_001278928.1:cytoplasmic protein NCK1 isoform 1
36	NAA30	2.1e-05	0	-16.737	0	0.834103	0	N-alpha-acetyltransferase 30
37	ARID5B	1.9e-05	0	-16.739	0	0.832203	0	ARID5B.NP_001231567.1:AT-rich interactive domain-containing protein 5B isoform 2 NP_115575.1:AT-rich interactive domain-containing protein 5B isoform 1
38	SAMD4B	1.9e-05	0	-16.771	0	0.827865	0	SAMD4B.NP_001290543.1:protein Smaug homolog 2 isoform b NP_060498.2:protein Smaug homolog 2 isoform a
39	ZFP36L2	2.2e-05	0	-16.807	0	0.831429	0	mRNA decay activator protein ZFP36L2
40	ISG20L2	2.1e-05	0	-16.821	0	0.828698	0	interferon-stimulated 20 kDa exonuclease-like 2
41	INHBA	2.6e-05	0	-16.845	0	0.836392	0	inhibin beta A chain preproprotein
42	ATXN3	2.7e-05	0	-16.967	0	0.835171	0	ATXN3.NP_001121168.1:ataxin-3 isoform ad NP_001121169.2:ataxin-3 isoform e NP_001158251.1:ataxin-3 isoform r NP_001158252.1:ataxin-3 isoform u NP_001158253.1:ataxin-3 isoform y NP_004984.2:ataxin-3 reference isoform NP_109376.1:ataxin-3 isoform h
43	FYTTD1	2.7e-05	0	-16.993	0	0.837528	0	FYTTD1.NP_001011537.2:UAP56-interacting factor isoform 2 NP_115664.2:UAP56-interacting factor isoform 1
44	MPI	2.5e-05	0	-17.017	0	0.82901	0	MPI.NP_001276084.1:mannose-6-phosphate isomerase isoform 2 NP_001317301.1:mannose-6-phosphate isomerase isoform 5 NP_002426.1:mannose-6-phosphate isomerase isoform 1
45	GTF2H2	2.8e-05	0	-17.036	0	0.833438	0	general transcription factor IIH subunit 2 isoform a
46	MTERF3	2.7e-05	0	-17.088	0	0.828369	0	MTERF3.NP_001349893.1:transcription termination factor 3, mitochondrial isoform 3 NP_057026.3:transcription termination factor 3, mitochondrial isoform 1 precursor
47	NOSIP	3.2e-05	0	-17.122	0	0.836164	0	nitric oxide synthase-interacting protein isoform 1
48	SMYD5	2.8e-05	0	-17.13	0	0.830812	0	SET and MYND domain-containing protein 5
49	ZFP36L1	4.2e-05	0	-17.171	0	0.837698	0	mRNA decay activator protein ZFP36L1 isoform 2
50	TINF2	3.1e-05	0	-17.192	0	0.832337	0	TINF2.NP_001092744.1:TERF1-interacting nuclear factor 2 isoform 1 NP_036593.2:TERF1-interacting nuclear factor 2 isoform 2
51	LEF1	3.4e-05	0	-17.196	0	0.834393	0	3 genes:LEF1,TCF7,TCF7L2.NP_001124185.1:lymphoid enhancer-binding factor 1 isoform 2 NP_001124186.1:lymphoid enhancer-binding factor 1 isoform 3 NP_001128323.2:transcription factor 7 isoform 3 NP_001139746.1:transcription factor 7-like 2 isoform 1 NP_001139755.1:transcription factor 7-like 2 isoform 3 NP_001139756.1:transcription factor 7-like 2 isoform 4 NP_001139757.1:transcription factor 7-lik…
52	RND3	3e-05	0	-17.202	0	0.830434	0	rho-related GTP-binding protein RhoE precursor
53	CYR61	4.9e-05	0	-17.232	0	0.838248	0	CCN family member 1 precursor
54	FOSL2	5.6e-05	0	-17.363	0	0.837506	0	fos-related antigen 2
55	RBM14-RBM4	4.2e-05	0	-17.479	0	0.830142	0	RBM14-RBM4 protein isoform 1
56	HDDC2	4.7e-05	0	-17.5	0	0.837037	0	HD domain-containing protein 2
57	AP3S1	7.6e-05	0	-17.703	0	0.837959	0	AP3S1.NP_001275.1:AP-3 complex subunit sigma-1 isoform 1 NP_001305020.1:AP-3 complex subunit sigma-1 isoform 4 NP_001305022.1:AP-3 complex subunit sigma-1 isoform 5 NP_001305023.1:AP-3 complex subunit sigma-1 isoform 6 NP_001351048.1:AP-3 complex subunit sigma-1 isoform 7 NP_001351049.1:AP-3 complex subunit sigma-1 isoform 8 NP_001351051.1:AP-3 complex subunit sigma-1 isoform 9
58	TMED9	5.1e-05	0	-17.727	0	0.828887	0	transmembrane emp24 domain-containing protein 9 precursor
59	NR2C2AP	5.7e-05	0	-17.733	0	0.835488	0	NR2C2AP.NP_001287874.1:nuclear receptor 2C2-associated protein isoform 1 NP_795361.1:nuclear receptor 2C2-associated protein isoform 2
60	DDX56	5.3e-05	0	-17.764	0	0.831125	0	DDX56.NP_001244118.1:probable ATP-dependent RNA helicase DDX56 isoform 2 NP_061955.1:probable ATP-dependent RNA helicase DDX56 isoform 1
61	SAR1B	8.1e-05	0	-17.813	0	0.836661	0	GTP-binding protein SAR1b
62	FAM207A	5.6e-05	0	-17.822	0	0.829976	0	FAM207A.NP_001303912.1:protein FAM207A isoform 2 NP_001303913.1:protein FAM207A isoform 3 NP_001303914.1:protein FAM207A isoform 4 NP_001303915.1:protein FAM207A isoform 5 NP_001303916.1:protein FAM207A isoform 6 NP_478070.1:protein FAM207A isoform 1
63	NAA20	7e-05	0	-17.922	0	0.834699	0	NAA20.NP_057184.1:N-alpha-acetyltransferase 20 isoform a NP_852668.1:N-alpha-acetyltransferase 20 isoform b
64	RRP36	6.8e-05	0	-17.932	0	0.835722	0	RRP36.NP_001316633.1:ribosomal RNA processing protein 36 homolog isoform 2 NP_149103.1:ribosomal RNA processing protein 36 homolog isoform 1
65	UTP11	6.8e-05	0	-17.988	0	0.82974	0	probable U3 small nucleolar RNA-associated protein 11
66	COMMD1	8.3e-05	0	-18.206	0	0.834915	0	COMMD1.NP_001358694.1:COMM domain-containing protein 1 isoform 2 NP_689729.1:COMM domain-containing protein 1 isoform 1
67	ZCCHC9	8.5e-05	0	-18.258	0	0.828684	0	zinc finger CCHC domain-containing protein 9
68	CCDC25	0.00016	0	-18.787	0	0.830995	0	CCDC25.NP_001291458.1:coiled-coil domain-containing protein 25 isoform 2 NP_060716.2:coiled-coil domain-containing protein 25 isoform 1
69	RPF1	0.000148	0	-18.79	0	0.827668	0	ribosome production factor 1
70	ANXA6	0.000284	0	-19.195	0	0.835861	0	annexin A6 isoform 3

## Sheet: AZD4573 FDR<0.05
Number	NCBI_Gene	Untreated dNSAF AVG	AZD4573 dNSAF AVG	AZD4573/Untreated:QPROT:LogFoldChange	AZD4573/Untreated:QPROT:fdr	AZD4573/Untreated:QPROT:FDRup	AZD4573/Untreated:QPROT:FDRdown	Description
	Enriched in AZD4573
1	COPS9	0	0.00029	19.404	0	0	0.844007	COP9 signalosome complex subunit 9 isoform 2
2	TP53	0	0.000165	18.785	0	0	0.854545	TP53.NP_001119584.1:cellular tumor antigen p53 isoform a NP_001119590.1:cellular tumor antigen p53 isoform g
3	RPS29	0	0.000127	18.545	0	0	0.849562	RPS29.NP_001023.1:40S ribosomal protein S29 isoform 1 NP_001338304.1:40S ribosomal protein S29 isoform 3
4	GTF2A2	0	0.000141	18.486	0	0	0.851081	transcription initiation factor IIA subunit 2
5	MRPS21	0	9.5e-05	18.304	0	0	0.839994	28S ribosomal protein S21, mitochondrial
6	PFN2	0	0.000111	18.285	0	0	0.852435	profilin-2 isoform a
7	ATP6V1G1	0	8e-05	18.124	0	0	0.838502	V-type proton ATPase subunit G 1
8	YAF2	0	8.1e-05	18.105	0	0	0.84599	YAF2.NP_001177908.1:YY1-associated factor 2 isoform 1 NP_005739.2:YY1-associated factor 2 isoform 2
9	CKAP2	0	7.1e-05	18.027	0	0	0.841976	CKAP2.NP_001091995.1:cytoskeleton-associated protein 2 isoform 2 NP_001273615.1:cytoskeleton-associated protein 2 isoform 3 NP_060674.3:cytoskeleton-associated protein 2 isoform 1
10	TMEM41B	0	6.5e-05	17.954	0	0	0.844598	TMEM41B.NP_001158502.1:transmembrane protein 41B isoform 2 NP_055827.1:transmembrane protein 41B isoform 1
11	MGST1	0	6.1e-05	17.888	0	0	0.832663	microsomal glutathione S-transferase 1 isoform a
12	GINS2	0	5.7e-05	17.831	0	0	0.832433	DNA replication complex GINS protein PSF2
13	FECH	0	6.2e-05	17.821	0	0	0.846378	FECH.NP_000131.2:ferrochelatase, mitochondrial isoform b precursor NP_001012533.1:ferrochelatase, mitochondrial isoform a precursor NP_001358023.1:ferrochelatase, mitochondrial isoform c
14	SUMO1	0	5.9e-05	17.818	0	0	0.845608	SUMO1.NP_001358321.1:small ubiquitin-related modifier 1 isoform d NP_001358323.1:small ubiquitin-related modifier 1 isoform c NP_003343.1:small ubiquitin-related modifier 1 isoform a precursor
15	LMO7	0	5.6e-05	17.78	0	0	0.844913	LIM domain only protein 7 isoform 1
16	ARMCX3	0	5.3e-05	17.765	0	0	0.834445	armadillo repeat-containing X-linked protein 3
17	MED31	0	6.3e-05	17.738	0	0	0.850126	mediator of RNA polymerase II transcription subunit 31
18	CD2BP2	0	7e-05	17.735	0	0	0.854045	CD2 antigen cytoplasmic tail-binding protein 2
19	CCDC115	0	6.2e-05	17.734	0	0	0.85426	CCDC115.NP_001308048.2:coiled-coil domain-containing protein 115 isoform d NP_115733.2:coiled-coil domain-containing protein 115 isoform a
20	LYRM4	0	5.2e-05	17.73	0	0	0.835861	LYR motif-containing protein 4 isoform 1
21	YIPF6	0	4.9e-05	17.694	0	0	0.832735	YIPF6.NP_001182143.1:protein YIPF6 isoform B NP_776195.2:protein YIPF6 isoform A
22	UQCC1	0	5.6e-05	17.693	0	0	0.850345	UQCC1.NP_001171906.1:ubiquinol-cytochrome-c reductase complex assembly factor 1 isoform c NP_060714.3:ubiquinol-cytochrome-c reductase complex assembly factor 1 isoform a NP_955781.2:ubiquinol-cytochrome-c reductase complex assembly factor 1 isoform b
23	MRPL24	0	4.9e-05	17.682	0	0	0.843211	39S ribosomal protein L24, mitochondrial
24	CHMP4A	0	5.8e-05	17.678	0	0	0.852401	charged multivesicular body protein 4a
25	CCNB1	0	4.7e-05	17.655	0	0	0.834437	G2/mitotic-specific cyclin-B1 isoform 3
26	CENPQ	0	4.8e-05	17.647	0	0	0.837695	centromere protein Q
27	RNASEH2A	0	4.7e-05	17.643	0	0	0.831655	ribonuclease H2 subunit A
28	WDR4	0	4.6e-05	17.622	0	0	0.83405	tRNA (guanine-N(7)-)-methyltransferase non-catalytic subunit WDR4 isoform 1
29	M6PR	0	4.3e-05	17.508	0	0	0.839872	cation-dependent mannose-6-phosphate receptor isoform 1 precursor
30	DYNLT3	0	4.1e-05	17.492	0	0	0.837359	dynein light chain Tctex-type 3
31	TST	0	5.2e-05	17.468	0	0	0.852854	thiosulfate sulfurtransferase
32	ATP5O	0	3.9e-05	17.45	0	0	0.837636	ATP synthase subunit O, mitochondrial precursor
33	ERCC1	0	3.9e-05	17.446	0	0	0.832125	ERCC1.NP_001159521.1:DNA excision repair protein ERCC-1 isoform 3 NP_001974.1:DNA excision repair protein ERCC-1 isoform 2
34	WDR12	0	4.2e-05	17.424	0	0	0.846447	ribosome biogenesis protein WDR12 isoform 1
35	POLR3G	0	3.7e-05	17.415	0	0	0.835119	POLR3G.NP_001357282.1:DNA-directed RNA polymerase III subunit RPC7 isoform 2 NP_001357283.1:DNA-directed RNA polymerase III subunit RPC7 isoform 1
36	TP53RK	0	3.7e-05	17.397	0	0	0.833797	EKC/KEOPS complex subunit TP53RK
37	POLD2	0	4.3e-05	17.396	0	0	0.851071	POLD2.NP_001243808.1:DNA polymerase delta subunit 2 isoform 1 NP_006221.2:DNA polymerase delta subunit 2 isoform 2
38	ARMC6	0	3.8e-05	17.386	0	0	0.836047	ARMC6.NP_001186125.1:armadillo repeat-containing protein 6 isoform 1 NP_219483.1:armadillo repeat-containing protein 6 isoform 2
39	APOBEC3C	0	4.3e-05	17.383	0	0	0.850364	DNA dC- dU-editing enzyme APOBEC-3C
40	GABPB1	0	3.6e-05	17.383	0	0	0.845705	GABPB1.NP_001307844.1:GA-binding protein subunit beta-1 isoform 5 NP_002032.2:GA-binding protein subunit beta-1 isoform gamma 1 NP_005245.2:GA-binding protein subunit beta-1 isoform beta 1 NP_057738.1:GA-binding protein subunit beta-1 isoform beta 2 NP_057739.1:GA-binding protein subunit beta-1 isoform gamma 2
41	DCUN1D4	0	3.6e-05	17.367	0	0	0.832381	DCUN1D4.NP_001035492.1:DCN1-like protein 4 isoform 1 NP_001274684.1:DCN1-like protein 4 isoform 3 NP_001274686.1:DCN1-like protein 4 isoform 4 NP_055930.2:DCN1-like protein 4 isoform 2
42	TRMT2A	0	3.5e-05	17.35	0	0	0.834405	TRMT2A.NP_001317968.1:tRNA (uracil-5-)-methyltransferase homolog A isoform c NP_073564.3:tRNA (uracil-5-)-methyltransferase homolog A isoform a
43	CRBN	0	3.8e-05	17.34	0	0	0.843283	CRBN.NP_001166953.1:protein cereblon isoform 2 NP_057386.2:protein cereblon isoform 1
44	CCDC97	0	3.4e-05	17.301	0	0	0.835429	coiled-coil domain-containing protein 97 isoform 2
45	PBDC1	0	4.1e-05	17.294	0	0	0.851354	protein PBDC1 isoform 1
46	MRPS10	0	3.5e-05	17.284	0	0	0.846097	28S ribosomal protein S10, mitochondrial
47	CCDC58	0	3.3e-05	17.276	0	0	0.842352	CCDC58.NP_001017928.1:coiled-coil domain-containing protein 58 isoform 1 NP_001295255.1:coiled-coil domain-containing protein 58 isoform 2
48	SMN1	0	3.2e-05	17.269	0	0	0.83392	SMN1.NP_000335.1:survival motor neuron protein isoform d NP_001284644.1:survival motor neuron protein isoform a
49	CWC15	0	3.6e-05	17.25	0	0	0.84999	spliceosome-associated protein CWC15 homolog
50	NME1	0	7.2e-05	17.239	0	0	0.855067	nucleoside diphosphate kinase A isoform b
51	MRPS2	0	4.8e-05	17.234	0	0	0.853424	28S ribosomal protein S2, mitochondrial
52	FRG1	0	3.2e-05	17.226	0	0	0.840344	protein FRG1
53	TRMT10C	0	2.9e-05	17.161	0	0	0.840131	tRNA methyltransferase 10 homolog C precursor
54	COQ9	0	3e-05	17.159	0	0	0.848898	ubiquinone biosynthesis protein COQ9, mitochondrial precursor
55	TMED5	0	3.1e-05	17.135	0	0	0.849315	transmembrane emp24 domain-containing protein 5 isoform 1 precursor
56	CASP4	0	3.1e-05	17.056	0	0	0.852946	caspase-4 isoform alpha precursor
57	CNPY4	0	2.9e-05	17.036	0	0	0.848607	protein canopy homolog 4 precursor
58	FAM118B	0	2.7e-05	17.036	0	0	0.843353	FAM118B.NP_001317375.1:protein FAM118B isoform 2 NP_078832.1:protein FAM118B isoform 1
59	CHST14	0	2.8e-05	17.024	0	0	0.846104	carbohydrate sulfotransferase 14
60	C5orf24	0	2.5e-05	17.018	0	0	0.832612	UPF0461 protein C5orf24 isoform 1
61	UCK2	0	2.4e-05	16.996	0	0	0.839536	UCK2.NP_001350497.1:uridine-cytidine kinase 2 isoform 2 NP_036606.2:uridine-cytidine kinase 2 isoform 1
62	CTDP1	0	2.5e-05	16.991	0	0	0.854109	CTDP1.NP_001189433.1:RNA polymerase II subunit A C-terminal domain phosphatase isoform 3 NP_004706.3:RNA polymerase II subunit A C-terminal domain phosphatase isoform 1
63	ABHD12	0	2.7e-05	16.979	0	0	0.848381	ABHD12.NP_001035937.1:lysophosphatidylserine lipase ABHD12 isoform a NP_056415.1:lysophosphatidylserine lipase ABHD12 isoform b
64	NAPA	0	2.4e-05	16.976	0	0	0.836504	alpha-soluble NSF attachment protein
65	ZMAT3	0	2.5e-05	16.952	0	0	0.848143	ZMAT3.NP_001362756.1:zinc finger matrin-type protein 3 isoform 2 NP_071915.1:zinc finger matrin-type protein 3 isoform 1
66	ZNF330	0	2.3e-05	16.899	0	0	0.839643	ZNF330.NP_001278931.1:zinc finger protein 330 isoform 2 NP_055302.1:zinc finger protein 330 isoform 1
67	TRMU	0	2.7e-05	16.885	0	0	0.854887	TRMU.NP_001269711.1:mitochondrial tRNA-specific 2-thiouridylase 1 isoform d NP_001269712.1:mitochondrial tRNA-specific 2-thiouridylase 1 isoform e NP_001269713.1:mitochondrial tRNA-specific 2-thiouridylase 1 isoform f NP_001269714.1:mitochondrial tRNA-specific 2-thiouridylase 1 isoform g NP_060476.2:mitochondrial tRNA-specific 2-thiouridylase 1 isoform a
68	SLC30A7	0	2.2e-05	16.876	0	0	0.83649	zinc transporter 7
69	BRAT1	0	2.2e-05	16.862	0	0	0.837828	BRAT1.NP_001337556.1:BRCA1-associated ATM activator 1 isoform 3 NP_689956.2:BRCA1-associated ATM activator 1 isoform 2
70	FBXL6	0	2.2e-05	16.836	0	0	0.839979	FBXL6.NP_036294.2:F-box/LRR-repeat protein 6 isoform 1 NP_078831.4:F-box/LRR-repeat protein 6 isoform 2
71	MTIF3	0	2.1e-05	16.817	0	0	0.841411	translation initiation factor IF-3, mitochondrial
72	NAE1	0	2.9e-05	16.785	0	0	0.854695	NAE1.NP_001018169.1:NEDD8-activating enzyme E1 regulatory subunit isoform b NP_001273429.1:NEDD8-activating enzyme E1 regulatory subunit isoform d NP_003896.1:NEDD8-activating enzyme E1 regulatory subunit isoform a
73	SIL1	0	2e-05	16.754	0	0	0.842777	nucleotide exchange factor SIL1 precursor
74	CCNL1	0	1.9e-05	16.743	0	0	0.840192	CCNL1.NP_001295114.1:cyclin-L1 isoform 2 NP_064703.1:cyclin-L1 isoform 1
75	UBLCP1	0	1.8e-05	16.695	0	0	0.841174	ubiquitin-like domain-containing CTD phosphatase 1
76	MANEAL	0	1.8e-05	16.689	0	0	0.841602	glycoprotein endo-alpha-1,2-mannosidase-like protein isoform 3 precursor
77	DNAJB12	0	1.9e-05	16.684	0	0	0.848681	DNAJB12.NP_001352009.1:dnaJ homolog subfamily B member 12 isoform 2 NP_001352010.1:dnaJ homolog subfamily B member 12 isoform 1
78	NFYC	0	1.8e-05	16.658	0	0	0.847472	NFYC.NP_001295043.1:nuclear transcription factor Y subunit gamma isoform 6 NP_001295044.1:nuclear transcription factor Y subunit gamma isoform 7
79	AHCYL2	0	1.8e-05	16.64	0	0	0.84189	adenosylhomocysteinase 3 isoform b
80	C5orf22	0	2.1e-05	16.618	0	0	0.852309	UPF0489 protein C5orf22
81	HMOX1	0	1.6e-05	16.592	0	0	0.837114	heme oxygenase 1
82	CLP1	0	1.6e-05	16.586	0	0	0.844722	CLP1.NP_001136069.1:polyribonucleotide 5'-hydroxyl-kinase Clp1 isoform 2 NP_006822.1:polyribonucleotide 5'-hydroxyl-kinase Clp1 isoform 1
83	METTL3	0	1.6e-05	16.578	0	0	0.837461	N6-adenosine-methyltransferase catalytic subunit
84	DEGS1	0	1.6e-05	16.571	0	0	0.833332	DEGS1.NP_001308471.1:sphingolipid delta(4)-desaturase DES1 isoform 3 NP_003667.1:sphingolipid delta(4)-desaturase DES1 isoform 1
85	SEC61A1	0	2e-05	16.536	0	0	0.853181	protein transport protein Sec61 subunit alpha isoform 1
86	TEAD4	0	1.6e-05	16.494	0	0	0.843967	transcriptional enhancer factor TEF-3 isoform 1
87	SAV1	0	1.5e-05	16.492	0	0	0.841833	protein salvador homolog 1
88	DHPS	0	1.4e-05	16.455	0	0	0.84107	DHPS.NP_001193903.1:deoxyhypusine synthase isoform d NP_001356622.1:deoxyhypusine synthase isoform g NP_001921.1:deoxyhypusine synthase isoform a
89	TCEA2	0	1.6e-05	16.446	0	0	0.851254	transcription elongation factor A protein 2 isoform a
90	AKAP8L	0	1.8e-05	16.436	0	0	0.852352	AKAP8L.NP_001278407.1:A-kinase anchor protein 8-like isoform 2 NP_055186.3:A-kinase anchor protein 8-like isoform 1
91	RSRC1	0	1.4e-05	16.433	0	0	0.83226	serine/Arginine-related protein 53 isoform 1
92	XPO6	0	1.4e-05	16.418	0	0	0.83532	XPO6.NP_001257869.1:exportin-6 isoform 1 NP_055986.1:exportin-6 isoform 2
93	TAF7	0	1.3e-05	16.402	0	0	0.833299	transcription initiation factor TFIID subunit 7
94	ETS1	0	1.5e-05	16.388	0	0	0.847758	ETS1.NP_001137292.1:protein C-ets-1 isoform 1 NP_001317380.1:protein C-ets-1 isoform 4 NP_005229.1:protein C-ets-1 isoform 2
95	IMPAD1	0	1.3e-05	16.362	0	0	0.835717	Golgi-resident adenosine 3',5'-bisphosphate 3'-phosphatase
96	HEATR3	0	1.2e-05	16.264	0	0	0.837344	HEAT repeat-containing protein 3 isoform a
97	TBL1X	0	1.2e-05	16.256	0	0	0.834255	F-box-like/WD repeat-containing protein TBL1X isoform b
98	EVL	0	1.1e-05	16.235	0	0	0.832571	EVL.NP_001317150.1:ena/VASP-like protein isoform 2 NP_057421.1:ena/VASP-like protein isoform 1
99	PTPN2	0	1.1e-05	16.231	0	0	0.835611	PTPN2.NP_001193942.1:tyrosine-protein phosphatase non-receptor type 2 isoform 4 NP_001295216.1:tyrosine-protein phosphatase non-receptor type 2 isoform 5 NP_002819.2:tyrosine-protein phosphatase non-receptor type 2 isoform 1 NP_536347.1:tyrosine-protein phosphatase non-receptor type 2 isoform 2 NP_536348.1:tyrosine-protein phosphatase non-receptor type 2 isoform 3
100	ZSCAN18	0	1.3e-05	16.21	0	0	0.850004	ZSCAN18.NP_001139014.1:zinc finger and SCAN domain-containing protein 18 isoform 1 NP_001139015.1:zinc finger and SCAN domain-containing protein 18 isoform 3
101	CCNH	0	4.8e-05	16.208	1e-06	0	0.855371	CCNH.NP_001230.1:cyclin-H isoform 1 NP_001350468.1:cyclin-H isoform 3 NP_001351004.1:cyclin-H isoform 4
102	MCCC1	0	1.3e-05	16.208	0	0	0.853002	MCCC1.NP_001280202.1:methylcrotonoyl-CoA carboxylase subunit alpha, mitochondrial isoform 2 NP_001350809.1:methylcrotonoyl-CoA carboxylase subunit alpha, mitochondrial isoform 3 NP_064551.3:methylcrotonoyl-CoA carboxylase subunit alpha, mitochondrial isoform 1 precursor
103	LIMK1	0	1.2e-05	16.151	0	0	0.846832	LIMK1.NP_001191355.1:LIM domain kinase 1 isoform 2 NP_002305.1:LIM domain kinase 1 isoform 1
104	CLCC1	0	1.1e-05	16.151	0	0	0.838866	CLCC1.NP_001041675.1:chloride channel CLIC-like protein 1 isoform 1 precursor NP_001265131.1:chloride channel CLIC-like protein 1 isoform 3 precursor NP_001265132.1:chloride channel CLIC-like protein 1 isoform 4 precursor NP_055942.1:chloride channel CLIC-like protein 1 isoform 2 precursor
105	MYBL2	0	1.2e-05	16.125	0	0	0.851823	myb-related protein B isoform 1
106	DDX11	0	1e-05	16.073	0	0	0.839399	DDX11.NP_001244073.1:ATP-dependent DNA helicase DDX11 isoform 3 NP_001244074.1:ATP-dependent DNA helicase DDX11 isoform 4 NP_085911.2:ATP-dependent DNA helicase DDX11 isoform 1
107	FANCI	0	1e-05	16.062	0	0	0.837086	FANCI.NP_001106849.1:Fanconi anemia group I protein isoform 1 NP_060663.2:Fanconi anemia group I protein isoform 2
108	AVL9	0	9e-06	15.981	0	0	0.84563	late secretory pathway protein AVL9 homolog
109	TOP3A	0	9e-06	15.968	0	0	0.839612	TOP3A.NP_001307688.1:DNA topoisomerase 3-alpha isoform 2 NP_004609.1:DNA topoisomerase 3-alpha isoform 1
110	TMEM214	0	9e-06	15.967	0	0	0.842607	TMEM214.NP_001077059.1:transmembrane protein 214 isoform 2 NP_060197.4:transmembrane protein 214 isoform 1
111	SETMAR	0	9e-06	15.956	0	0	0.836291	SETMAR.NP_001230652.1:histone-lysine N-methyltransferase SETMAR isoform 2 NP_001307605.1:histone-lysine N-methyltransferase SETMAR isoform 5 NP_001307606.1:histone-lysine N-methyltransferase SETMAR isoform 6 NP_001307607.1:histone-lysine N-methyltransferase SETMAR isoform 7 NP_006506.3:histone-lysine N-methyltransferase SETMAR isoform 1
112	BARD1	0	9e-06	15.926	0	0	0.848755	BARD1.NP_000456.2:BRCA1-associated RING domain protein 1 isoform 1 NP_001269472.1:BRCA1-associated RING domain protein 1 isoform 2
113	SH3D19	0	9e-06	15.894	0	0	0.847375	SH3D19.NP_001009555.3:SH3 domain-containing protein 19 isoform 1 NP_001122395.1:SH3 domain-containing protein 19 isoform 2 NP_001122396.1:SH3 domain-containing protein 19 isoform 3
114	ZMIZ1	0	8e-06	15.885	0	0	0.846697	zinc finger MIZ domain-containing protein 1
115	TUT1	0	9e-06	15.827	0	0	0.853651	speckle targeted PIP5K1A-regulated poly(A) polymerase isoform 1
116	SMARCAL1	0	7e-06	15.804	0	0	0.844504	SWI/SNF-related matrix-associated actin-dependent regulator of chromatin subfamily A-like protein 1
117	RICTOR	0	7e-06	15.8	0	0	0.84189	RICTOR.NP_001272368.1:rapamycin-insensitive companion of mTOR isoform 2 NP_689969.2:rapamycin-insensitive companion of mTOR isoform 1
118	ZBTB33	0	7e-06	15.768	0	0	0.836291	transcriptional regulator Kaiso
119	SENP5	0	7e-06	15.713	0	0	0.84179	SENP5.NP_001294974.1:sentrin-specific protease 5 isoform 2 NP_689912.2:sentrin-specific protease 5 isoform 1
120	POLR3B	0	7e-06	15.665	0	0	0.838171	POLR3B.NP_001154180.1:DNA-directed RNA polymerase III subunit RPC2 isoform 2 NP_060552.4:DNA-directed RNA polymerase III subunit RPC2 isoform 1
121	COL4A3BP	0	6e-06	15.654	0	0	0.838457	CERT1.NP_001123577.1:ceramide transfer protein isoform 3 NP_005704.1:ceramide transfer protein isoform 1 NP_112729.1:ceramide transfer protein isoform 2
122	TNFAIP2	0	7e-06	15.649	0	0	0.842242	TNFAIP2.NP_001358150.1:tumor necrosis factor alpha-induced protein 2 isoform 2 NP_006282.2:tumor necrosis factor alpha-induced protein 2 isoform 1
123	DENND2A	0	7e-06	15.636	0	0	0.847912	DENN domain-containing protein 2A isoform a
124	OBSL1	0	6e-06	15.535	0	0	0.842929	OBSL1.NP_001166879.1:obscurin-like protein 1 isoform 3 precursor NP_001166902.1:obscurin-like protein 1 isoform 2 precursor NP_056126.1:obscurin-like protein 1 isoform 1 precursor
125	PLEKHA6	0	6e-06	15.508	0	0	0.840496	pleckstrin homology domain-containing family A member 6
126	NRDE2	0	6e-06	15.497	0	0	0.849802	nuclear exosome regulator NRDE2
127	SCARF2	0	5e-06	15.497	0	0	0.836708	SCARF2.NP_699165.3:scavenger receptor class F member 2 isoform 1 precursor NP_878315.2:scavenger receptor class F member 2 isoform 2 precursor
128	DOT1L	0	6e-06	15.464	0	0	0.853394	histone-lysine N-methyltransferase, H3 lysine-79 specific
129	USP28	0	5e-06	15.421	0	0	0.847097	USP28.NP_001333181.1:ubiquitin carboxyl-terminal hydrolase 28 isoform c NP_001333182.1:ubiquitin carboxyl-terminal hydrolase 28 isoform d NP_001333183.1:ubiquitin carboxyl-terminal hydrolase 28 isoform e NP_001333184.1:ubiquitin carboxyl-terminal hydrolase 28 isoform f NP_001333186.1:ubiquitin carboxyl-terminal hydrolase 28 isoform g NP_001333187.1:ubiquitin carboxyl-terminal hydrolase 28 isoform…
130	HSPA2	0	6e-06	15.42	0	0	0.851626	heat shock-related 70 kDa protein 2
131	ARHGEF18	0	5e-06	15.403	0	0	0.849484	ARHGEF18.NP_001124427.2:rho guanine nucleotide exchange factor 18 isoform b NP_001354752.1:rho guanine nucleotide exchange factor 18 isoform c NP_056133.2:rho guanine nucleotide exchange factor 18 isoform a
132	MROH1	0	4e-06	15.171	0	0	0.846891	MROH1. 1 proteins in this group did not match any genes. NP_001275743.1:maestro heat-like repeat-containing protein family member 1 isoform 3 NP_115826.2:maestro heat-like repeat-containing protein family member 1 isoform 1
133	YTHDC2	0	4e-06	15.099	0	0	0.837873	YTHDC2.NP_001332904.1:3'-5' RNA helicase YTHDC2 isoform 2 NP_001332905.1:3'-5' RNA helicase YTHDC2 isoform 3 NP_073739.3:3'-5' RNA helicase YTHDC2 isoform 1
134	CASC5	0	7e-06	14.683	1e-06	0	0.855354	KNL1.NP_653091.3:kinetochore scaffold 1 isoform 2 NP_733468.3:kinetochore scaffold 1 isoform 1
135	DOPEY1	0	2e-06	14.411	0	0	0.843329	DOP1A.NP_001186871.1:protein dopey-1 isoform b NP_055833.2:protein dopey-1 isoform a
136	ZNF791	0	2e-06	14.316	0	0	0.850364	zinc finger protein 791
137	SMG1	0	1e-06	14.041	0	0	0.844218	serine/threonine-protein kinase SMG1
	Depleted in AZD4573
1	POLDIP3	0.000224	3.5e-05	-1.836	0.001932	0.841753	0.000209	Polymerase delta-interacting protein 3 isoform 3 NP_115687.2:polymerase delta-interacting protein 3 isoform 1
2	DMXL2	6e-06	0	-15.076	0	0.838475	0	DMXL2.NP_001167587.1:dmX-like protein 2 isoform 1 NP_056078.2:dmX-like protein 2 isoform 2
3	AFF4	5e-06	0	-15.414	0	0.833846	0	AF4/FMR2 family member 4
4	RREB1	6e-06	0	-15.625	0	0.833665	0	RREB1.NP_001003698.1:ras-responsive element-binding protein 1 isoform 2 NP_001003699.1:ras-responsive element-binding protein 1 isoform 1 NP_001003700.1:ras-responsive element-binding protein 1 isoform 3
5	USP36	8e-06	0	-15.722	0	0.837548	0	ubiquitin carboxyl-terminal hydrolase 36
6	FER	7e-06	0	-15.791	0	0.834342	0	tyrosine-protein kinase Fer isoform a
7	BCL6	9e-06	0	-15.926	0	0.834691	0	B-cell lymphoma 6 protein isoform 1
8	ZNF217	9e-06	0	-15.94	0	0.834194	0	zinc finger protein 217
9	FBXO11	1e-05	0	-16	0	0.836457	0	FBXO11.NP_001177203.1:F-box only protein 11 isoform 4 NP_079409.3:F-box only protein 11 isoform 1
10	ZXDC	1.1e-05	0	-16.063	0	0.836939	0	ZXDC.NP_001035743.1:zinc finger protein ZXDC isoform 2 NP_079388.3:zinc finger protein ZXDC isoform 1
11	CDC20	1.2e-05	0	-16.237	0	0.833502	0	cell division cycle protein 20 homolog
12	WDR59	1.4e-05	0	-16.321	0	0.835615	0	WDR59.NP_001311100.1:GATOR complex protein WDR59 isoform 2 NP_001311101.1:GATOR complex protein WDR59 isoform 3 NP_085058.3:GATOR complex protein WDR59 isoform 1
13	CCDC174	1.3e-05	0	-16.371	0	0.832992	0	coiled-coil domain-containing protein 174
14	BICC1	1.4e-05	0	-16.386	0	0.835229	0	protein bicaudal C homolog 1
15	EPS15	1.6e-05	0	-16.413	0	0.837061	0	EPS15.NP_001153441.1:epidermal growth factor receptor substrate 15 isoform B NP_001972.1:epidermal growth factor receptor substrate 15 isoform A
16	ZNF622	1.5e-05	0	-16.514	0	0.833891	0	zinc finger protein 622
17	CDR2L	1.7e-05	0	-16.519	0	0.836276	0	cerebellar degeneration-related protein 2-like
18	SEPSECS	1.7e-05	0	-16.625	0	0.83498	0	O-phosphoseryl-tRNA(Sec) selenium transferase
19	GPR89B	1.7e-05	0	-16.628	0	0.832897	0	GPR89B.NP_001337111.1:Golgi pH regulator B isoform 2 NP_001337112.1:Golgi pH regulator B isoform 3 NP_057418.1:Golgi pH regulator B isoform 1
20	MGAT2	3.7e-05	0	-16.741	0	0.83868	0	alpha-1,6-mannosyl-glycoprotein 2-beta-N-acetylglucosaminyltransferase
21	NSUN6	1.9e-05	0	-16.763	0	0.833064	0	NSUN6.NP_001338044.1:tRNA (cytosine(72)-C(5))-methyltransferase NSUN6 isoform 2 NP_001338045.1:tRNA (cytosine(72)-C(5))-methyltransferase NSUN6 isoform 3 NP_872349.1:tRNA (cytosine(72)-C(5))-methyltransferase NSUN6 isoform 1
22	NAA30	2.1e-05	0	-16.776	0	0.837241	0	N-alpha-acetyltransferase 30
23	ZFP36L2	2.2e-05	0	-16.796	0	0.835017	0	mRNA decay activator protein ZFP36L2
24	MAP4K4	2.7e-05	0	-16.938	0	0.83685	0	mitogen-activated protein kinase kinase kinase kinase 4 isoform 5
25	FYTTD1	2.7e-05	0	-17.01	0	0.835374	0	FYTTD1.NP_001011537.2:UAP56-interacting factor isoform 2 NP_115664.2:UAP56-interacting factor isoform 1
26	C1orf198	2.5e-05	0	-17.025	0	0.832386	0	C1orf198.NP_001129966.1:uncharacterized protein C1orf198 isoform 2 NP_001129967.1:uncharacterized protein C1orf198 isoform 3 NP_116189.1:uncharacterized protein C1orf198 isoform 1
27	TOM1L2	2.6e-05	0	-17.058	0	0.831958	0	TOM1L2.NP_001076437.1:TOM1-like protein 2 isoform 3 NP_001275715.1:TOM1-like protein 2 isoform 4 NP_001337261.1:TOM1-like protein 2 isoform 9 NP_001337262.1:TOM1-like protein 2 isoform 10
28	RND3	3e-05	0	-17.186	0	0.831973	0	rho-related GTP-binding protein RhoE precursor
29	HIF1AN	4.7e-05	0	-17.212	0	0.837875	0	hypoxia-inducible factor 1-alpha inhibitor
30	CCDC71L	3.1e-05	0	-17.235	0	0.832142	0	coiled-coil domain-containing protein 71L
31	GLMP	3.5e-05	0	-17.264	0	0.836607	0	GLMP.NP_001243533.1:glycosylated lysosomal membrane protein isoform 2 precursor NP_001243537.1:glycosylated lysosomal membrane protein isoform 4 precursor NP_653181.1:glycosylated lysosomal membrane protein isoform 1 precursor
32	FOSL2	5.6e-05	0	-17.362	0	0.838135	0	fos-related antigen 2
33	CYR61	4.9e-05	0	-17.429	0	0.837853	0	CCN family member 1 precursor
34	HDDC2	4.7e-05	0	-17.48	0	0.836027	0	HD domain-containing protein 2
35	SRXN1	4.4e-05	0	-17.542	0	0.833919	0	sulfiredoxin-1
36	CEBPB	5.4e-05	0	-17.593	0	0.835914	0	CEBPB.NP_001272807.1:CCAAT/enhancer-binding protein beta isoform b NP_005185.2:CCAAT/enhancer-binding protein beta isoform a
37	DDX56	5.3e-05	0	-17.752	0	0.834232	0	DDX56.NP_001244118.1:probable ATP-dependent RNA helicase DDX56 isoform 2 NP_061955.1:probable ATP-dependent RNA helicase DDX56 isoform 1
38	UAP1	8.5e-05	0	-17.883	0	0.837673	0	UDP-N-acetylhexosamine pyrophosphorylase isoform b
39	RRP36	6.8e-05	0	-17.896	0	0.835855	0	RRP36.NP_001316633.1:ribosomal RNA processing protein 36 homolog isoform 2 NP_149103.1:ribosomal RNA processing protein 36 homolog isoform 1
40	ARPC5L	0.00013	0	-17.922	0	0.838363	0	actin-related protein 2/3 complex subunit 5-like protein
41	MAD2L1BP	7.5e-05	0	-18.081	0	0.832892	0	MAD2L1BP.NP_001003690.1:MAD2L1-binding protein isoform 1 NP_055443.1:MAD2L1-binding protein isoform 2
42	ZCCHC9	8.5e-05	0	-18.236	0	0.831655	0	zinc finger CCHC domain-containing protein 9
43	RPF1	0.000148	0	-18.801	0	0.832382	0	ribosome production factor 1

## Sheet: QPROT statisticts
NCBI_Gene	Protein ID	Description	Untreated_1-Smn7-s10-v2-p2-r2_dNSAF	Untreated_2-Smn7-s10-v2-p2-r2_dNSAF	Flavo_1-Smn7-s10-v2-p2-r2_dNSAF	Flavo_2-Smn7-s10-v2-p2-r2_dNSAF	AZD4573_1-Smn7-s10-v2-p2-r2_dNSAF	AZD4573_2-Smn7-s10-v2-p2-r2_dNSAF	Flavo/Untreated:QPROT:LogFoldChange	Flavo/Untreated:QPROT:Zstatistic	Flavo/Untreated:QPROT:fdr	Flavo/Untreated:QPROT:FDRup	Flavo/Untreated:QPROT:FDRdown	AZD4573/Untreated:QPROT:LogFoldChange	AZD4573/Untreated:QPROT:Zstatistic	AZD4573/Untreated:QPROT:fdr	AZD4573/Untreated:QPROT:FDRup	AZD4573/Untreated:QPROT:FDRdown
ANXA6	NP_001350043.1	annexin A6 isoform 3 [Homo sapiens]	0.00042754	0.00014096	0	0	0.00025178	0	-19.195	-30.6456	0	0.835861	0	-7.041	-1.7724	0.680159	0.953908	0.280916
RPF1	NP_079341.2	ribosome production factor 1 [Homo sapiens]	0.00014947	0.00014562	0	0	0	0	-18.79	-66.4548	0	0.827668	0	-18.801	-55.8911	0	0.832382	0
CCDC25	NP_001291458.1	1 genes:CCDC25.NP_001291458.1:coiled-coil domain-containing protein 25 isoform 2 [Homo sapiens] ;NP_060716.2:coiled-coil domain-containing protein 25 isoform 1 [Homo sapiens] ;	0.00020219	0.00011819	0	0	8.31e-05	0	-18.787	-47.2496	0	0.830995	0	-8.875	-2.5685	0.311681	0.913392	0.116294
ZCCHC9	NP_001124507.1	zinc finger CCHC domain-containing protein 9 [Homo sapiens]	7.7e-05	9.377e-05	0	0	0	0	-18.258	-53.5996	0	0.828684	0	-18.236	-65.567	0	0.831655	0
COMMD1	NP_001358694.1	1 genes:COMMD1.NP_001358694.1:COMM domain-containing protein 1 isoform 2 [Homo sapiens] ;NP_689729.1:COMM domain-containing protein 1 isoform 1 [Homo sapiens] ;	8.414e-05	8.197e-05	0	0	0	3.758e-05	-18.206	-34.4471	0	0.834915	0	-7.999	-1.8798	0.622055	0.949368	0.253723
UTP11	NP_057121.2	probable U3 small nucleolar RNA-associated protein 11 [Homo sapiens]	5.498e-05	8.035e-05	0	0	1.883e-05	0	-17.988	-50.3681	0	0.82974	0	-8.275	-2.5355	0.323687	0.91552	0.122345
RRP36	NP_001316633.1	1 genes:RRP36.NP_001316633.1:ribosomal RNA processing protein 36 homolog isoform 2 [Homo sapiens] ;NP_149103.1:ribosomal RNA processing protein 36 homolog isoform 1 [Homo sapiens] ;	9.584e-05	4.002e-05	0	0	0	0	-17.932	-31.2594	0	0.835722	0	-17.896	-36.4454	0	0.835855	0
NAA20	NP_057184.1	1 genes:NAA20.NP_057184.1:N-alpha-acetyltransferase 20 isoform a [Homo sapiens] ;NP_852668.1:N-alpha-acetyltransferase 20 isoform b [Homo sapiens] ;	9.769e-05	4.283e-05	0	0	2.676e-05	0	-17.922	-35.1638	0	0.834699	0	-7.873	-2.2956	0.420038	0.928455	0.163449
FAM207A	NP_001303912.1	1 genes:FAM207A.NP_001303912.1:protein FAM207A isoform 2 [Homo sapiens] ;NP_001303913.1:protein FAM207A isoform 3 [Homo sapiens] ;NP_001303914.1:protein FAM207A isoform 4 [Homo sapiens] ;NP_001303915.1:protein FAM207A isoform 5 [Homo sapiens] ;NP_001303916.1:protein FAM207A isoform 6 [Homo sapiens] ;NP_478070.1:protein FAM207A isoform 1 [Homo sapiens] ;	4.556e-05	6.658e-05	0	0	0	2.035e-05	-17.822	-49.6301	0	0.829976	0	-8.866	-2.294	0.420733	0.928454	0.163451
SAR1B	NP_001028675.1	GTP-binding protein SAR1b [Homo sapiens]	0.00013173	3.107e-05	0	0	5.882e-05	2.681e-05	-17.813	-27.3504	0	0.836661	0	-0.538	-0.4985	1	0.92211	0.677328
DDX56	NP_001244118.1	1 genes:DDX56.NP_001244118.1:probable ATP-dependent RNA helicase DDX56 isoform 2 [Homo sapiens] ;NP_061955.1:probable ATP-dependent RNA helicase DDX56 isoform 1 [Homo sapiens] ;	6.173e-05	4.511e-05	0	0	0	0	-17.764	-46.9818	0	0.831125	0	-17.752	-47.3232	0	0.834232	0
NR2C2AP	NP_001287874.1	1 genes:NR2C2AP.NP_001287874.1:nuclear receptor 2C2-associated protein isoform 1 [Homo sapiens] ;NP_795361.1:nuclear receptor 2C2-associated protein isoform 2 [Homo sapiens] ;	8.33e-05	3.043e-05	0	0	2.853e-05	2.791e-05	-17.733	-32.256	0	0.835488	0	-0.547	-1.0846	1	0.962751	0.487739
TMED9	NP_059980.2	transmembrane emp24 domain-containing protein 9 precursor [Homo sapiens]	5.92e-05	4.325e-05	0	0	0	2.975e-05	-17.727	-52.992	0	0.828887	0	-8.68	-3.2361	0.131153	0.881906	0.044458
AP3S1	NP_001275.1	1 genes:AP3S1.NP_001275.1:AP-3 complex subunit sigma-1 isoform 1 [Homo sapiens] ;NP_001305020.1:AP-3 complex subunit sigma-1 isoform 4 [Homo sapiens] ;NP_001305022.1:AP-3 complex subunit sigma-1 isoform 5 [Homo sapiens] ;NP_001305023.1:AP-3 complex subunit sigma-1 isoform 6 [Homo sapiens] ;NP_001351048.1:AP-3 complex subunit sigma-1 isoform 7 [Homo sapiens] ;NP_001351049.1:AP-3 complex subunit si…	0.00012613	2.633e-05	0	0	3.703e-05	0	-17.703	-20.4661	0	0.837959	0	-6.851	-1.5611	0.799117	0.961087	0.339607
HDDC2	NP_057147.2	HD domain-containing protein 2 [Homo sapiens]	6.819e-05	2.491e-05	0	0	0	0	-17.5	-25.8221	0	0.837037	0	-17.48	-35.4173	0	0.836027	0
RBM14-RBM4	NP_001185774.1	RBM14-RBM4 protein isoform 1 [Homo sapiens]	3.078e-05	5.247e-05	0	0	0	3.322e-05	-17.479	-49.1657	0	0.830142	0	-6.269	-2.0266	0.546164	0.942398	0.218885
FOSL2	NP_005244.1	fos-related antigen 2 [Homo sapiens]	9.601e-05	1.559e-05	0	0	0	0	-17.363	-23.6548	0	0.837506	0	-17.362	-20.9297	0	0.838135	0
CYR61	NP_001545.2	CCN family member 1 precursor [Homo sapiens]	1.826e-05	8.004e-05	0	0	0	0	-17.232	-17.3668	0	0.838248	0	-17.429	-23.2283	0	0.837853	0
RND3	NP_005159.1	rho-related GTP-binding protein RhoE precursor [Homo sapiens]	2.851e-05	3.124e-05	0	0	0	0	-17.202	-48.4408	0	0.830434	0	-17.186	-58.596	0	0.831973	0
LEF1	NP_001124185.1	3 genes:LEF1,TCF7,TCF7L2.NP_001124185.1:lymphoid enhancer-binding factor 1 isoform 2 [Homo sapiens] ;NP_001124186.1:lymphoid enhancer-binding factor 1 isoform 3 [Homo sapiens] ;NP_001128323.2:transcription factor 7 isoform 3 [Homo sapiens] ;NP_001139746.1:transcription factor 7-like 2 isoform 1 [Homo sapiens] ;NP_001139755.1:transcription factor 7-like 2 isoform 3 [Homo sapiens] ;NP_001139756.1:t…	4.687e-05	2.055e-05	0	0	3.852e-05	2.512e-05	-17.196	-36.1409	0	0.834393	0	0	0.0007	1	0.838082	0.821011
TINF2	NP_001092744.1	1 genes:TINF2.NP_001092744.1:TERF1-interacting nuclear factor 2 isoform 1 [Homo sapiens] ;NP_036593.2:TERF1-interacting nuclear factor 2 isoform 2 [Homo sapiens] ;	3.856e-05	2.254e-05	0	0	1.056e-05	1.55e-05	-17.192	-44.3572	0	0.832337	0	-0.815	-2.0632	0.527965	0.940386	0.209925
ZFP36L1	NP_001231630.1	mRNA decay activator protein ZFP36L1 isoform 2 [Homo sapiens]	6.646e-05	1.665e-05	0	0	0	1.718e-05	-17.171	-22.5738	0	0.837698	0	-8.034	-2.507	0.334298	0.916946	0.126511
SMYD5	NP_006053.2	SET and MYND domain-containing protein 5 [Homo sapiens]	2.496e-05	3.04e-05	0	0	0	2.23e-05	-17.13	-47.6121	0	0.830812	0	-7.363	-2.1674	0.477891	0.934859	0.187139
NOSIP	NP_001257889.1	nitric oxide synthase-interacting protein isoform 1 [Homo sapiens]	4.622e-05	1.688e-05	0	0	1.583e-05	0	-17.122	-29.3658	0	0.836164	0	-6.069	-1.4418	0.867855	0.963674	0.374869
MTERF3	NP_001349893.1	1 genes:MTERF3.NP_001349893.1:transcription termination factor 3, mitochondrial isoform 3 [Homo sapiens] ;NP_057026.3:transcription termination factor 3, mitochondrial isoform 1 precursor [Homo sapiens] ;	3.064e-05	2.239e-05	0	0	2.099e-05	2.053e-05	-17.088	-54.7481	0	0.828369	0	-0.253	-0.7956	1	0.949443	0.583443
GTF2H2	NP_001506.1	general transcription factor IIH subunit 2 isoform a [Homo sapiens]	1.908e-05	3.645e-05	0	0	3.618e-05	1.77e-05	-17.036	-40.0614	0	0.833438	0	-0.034	-0.0668	1	0.851818	0.804053
MPI	NP_001276084.1	1 genes:MPI.NP_001276084.1:mannose-6-phosphate isomerase isoform 2 [Homo sapiens] ;NP_001317301.1:mannose-6-phosphate isomerase isoform 5 [Homo sapiens] ;NP_002426.1:mannose-6-phosphate isomerase isoform 1 [Homo sapiens] ;	2.423e-05	2.656e-05	0	0	1.66e-05	4.059e-05	-17.017	-52.6385	0	0.82901	0	0.006	0.0132	1	0.835242	0.824318
FYTTD1	NP_001011537.2	1 genes:FYTTD1.NP_001011537.2:UAP56-interacting factor isoform 2 [Homo sapiens] ;NP_115664.2:UAP56-interacting factor isoform 1 [Homo sapiens] ;	3.573e-05	1.74e-05	0	0	0	0	-16.993	-23.5463	0	0.837528	0	-17.01	-40.1832	0	0.835374	0
ATXN3	NP_001121168.1	1 genes:ATXN3.NP_001121168.1:ataxin-3 isoform ad [Homo sapiens] ;NP_001121169.2:ataxin-3 isoform e [Homo sapiens] ;NP_001158251.1:ataxin-3 isoform r [Homo sapiens] ;NP_001158252.1:ataxin-3 isoform u [Homo sapiens] ;NP_001158253.1:ataxin-3 isoform y [Homo sapiens] ;NP_004984.2:ataxin-3 reference isoform [Homo sapiens] ;NP_109376.1:ataxin-3 isoform h [Homo sapiens] ;	4.02e-05	1.469e-05	0	0	1.377e-05	1.347e-05	-16.967	-33.5338	0	0.835171	0	-0.516	-1.0219	1	0.960841	0.509387
INHBA	NP_002183.1	inhibin beta A chain preproprotein [Homo sapiens]	4.082e-05	1.193e-05	0	0	0	1.094e-05	-16.845	-28.4307	0	0.836392	0	-7.204	-2.418	0.368894	0.921251	0.139632
ISG20L2	NP_001357079.1	interferon-stimulated 20 kDa exonuclease-like 2 [Homo sapiens]	1.97e-05	2.16e-05	0	0	1.35e-05	1.32e-05	-16.821	-53.5638	0	0.828698	0	-0.421	-1.1668	1	0.964267	0.461965
ZFP36L2	NP_008818.3	mRNA decay activator protein ZFP36L2 [Homo sapiens]	1.564e-05	2.743e-05	0	0	0	0	-16.807	-46.383	0	0.831429	0	-16.796	-42.8572	0	0.835017	0
SAMD4B	NP_001290543.1	1 genes:SAMD4B.NP_001290543.1:protein Smaug homolog 2 isoform b [Homo sapiens] ;NP_060498.2:protein Smaug homolog 2 isoform a [Homo sapiens] ;	2.01e-05	1.836e-05	0	0	0	6.73e-06	-16.771	-63.6799	0	0.827865	0	-8.92	-2.528	0.326457	0.91552	0.122359
ARID5B	NP_001231567.1	1 genes:ARID5B.NP_001231567.1:AT-rich interactive domain-containing protein 5B isoform 2 [Homo sapiens] ;NP_115575.1:AT-rich interactive domain-containing protein 5B isoform 1 [Homo sapiens] ;	2.208e-05	1.613e-05	0	0	0	4.93e-06	-16.739	-44.6908	0	0.832203	0	-8.754	-2.3968	0.377458	0.922692	0.144176
NAA30	NP_001011713.2	N-alpha-acetyltransferase 30 [Homo sapiens]	2.882e-05	1.404e-05	0	0	0	0	-16.737	-37.1158	0	0.834103	0	-16.776	-28.0248	0	0.837241	0
NCK1	NP_001177725.1	1 genes:NCK1.NP_001177725.1:cytoplasmic protein NCK1 isoform 2 [Homo sapiens] ;NP_001278928.1:cytoplasmic protein NCK1 isoform 1 [Homo sapiens] ;	2.222e-05	1.624e-05	0	0	0	1.489e-05	-16.715	-46.0447	0	0.831599	0	-7.283	-2.1416	0.490043	0.936259	0.19268
NAB2	NP_001317234.1	1 genes:NAB2.NP_001317234.1:NGFI-A-binding protein 2 isoform 2 [Homo sapiens] ;NP_005958.1:NGFI-A-binding protein 2 isoform 1 [Homo sapiens] ;	1.509e-05	2.205e-05	0	0	1.033e-05	1.011e-05	-16.688	-53.0033	0	0.828887	0	-0.586	-1.669	0.737749	0.957861	0.30957
CAMK2G	NP_001354471.1	calcium/calmodulin-dependent protein kinase type II subunit gamma isoform 35 [Homo sapiens]	1.067e-05	3.508e-05	0	0	2.923e-05	0	-16.684	-29.1655	0	0.83621	0	-5.96	-1.5893	0.782981	0.960357	0.331972
RPRD1A	NP_060640.2	regulation of nuclear pre-mRNA domain-containing protein 1A isoform 1 [Homo sapiens]	1.254e-05	2.036e-05	0	0	3.054e-05	7.966e-05	-16.558	-36.4934	0	0.834284	0	1.14	2.0528	0.652248	0.245846	0.977858
FAM171A1	NP_001010924.1	protein FAM171A1 precursor [Homo sapiens]	3.126e-05	8.57e-06	0	0	5.35e-06	1.047e-05	-16.529	-26.7916	0	0.836802	0	-0.801	-1.1179	1	0.963608	0.474844
NSUN6	NP_001338044.1	1 genes:NSUN6.NP_001338044.1:tRNA (cytosine(72)-C(5))-methyltransferase NSUN6 isoform 2 [Homo sapiens] ;NP_001338045.1:tRNA (cytosine(72)-C(5))-methyltransferase NSUN6 isoform 3 [Homo sapiens] ;NP_872349.1:tRNA (cytosine(72)-C(5))-methyltransferase NSUN6 isoform 1 [Homo sapiens] ;	2.229e-05	1.629e-05	0	0	0	0	-16.49	-8.109	1e-06	0.838548	0	-16.763	-51.55	0	0.833064	0
DTX2	NP_001096065.1	1 genes:DTX2.NP_001096065.1:probable E3 ubiquitin-protein ligase DTX2 isoform a [Homo sapiens] ;NP_001096066.1:probable E3 ubiquitin-protein ligase DTX2 isoform b [Homo sapiens] ;	1.118e-05	1.634e-05	0	0	1.532e-05	1.873e-05	-16.404	-47.2626	0	0.830988	0	0.223	0.627	1	0.67526	0.942372
CCDC174	NP_057558.3	coiled-coil domain-containing protein 174 [Homo sapiens]	1.489e-05	1.088e-05	0	0	0	0	-16.342	-44.1301	0	0.832418	0	-16.371	-51.891	0	0.832992	0
WDR59	NP_001311100.1	1 genes:WDR59.NP_001311100.1:GATOR complex protein WDR59 isoform 2 [Homo sapiens] ;NP_001311101.1:GATOR complex protein WDR59 isoform 3 [Homo sapiens] ;NP_085058.3:GATOR complex protein WDR59 isoform 1 [Homo sapiens] ;	1.827e-05	8.9e-06	0	0	0	0	-16.335	-38.4391	0	0.833771	0	-16.321	-38.0958	0	0.835615	0
GPHN	NP_001019389.1	1 genes:GPHN.NP_001019389.1:gephyrin isoform 2 [Homo sapiens] ;NP_065857.1:gephyrin isoform 1 [Homo sapiens] ;	1.89e-05	6.91e-06	0	0	0	6.33e-06	-16.197	-32.5521	0	0.835416	0	-5.856	-1.5107	0.828084	0.962386	0.35509
AMOTL2	NP_001265612.1	1 genes:AMOTL2.NP_001265612.1:angiomotin-like protein 2 isoform 1 [Homo sapiens] ;NP_001265614.1:angiomotin-like protein 2 isoform 3 [Homo sapiens] ;NP_001350872.1:angiomotin-like protein 2 isoform 4 [Homo sapiens] ;NP_057285.3:angiomotin-like protein 2 isoform 2 [Homo sapiens] ;	1.246e-05	9.11e-06	0	0	5.69e-06	5.57e-06	-16.148	-52.7151	0	0.828986	0	-0.651	-1.9537	0.583295	0.945653	0.234373
ZNF8	NP_066575.2	zinc finger protein 8 [Homo sapiens]	1.21e-05	8.84e-06	0	0	8.29e-06	0	-16.133	-44.0337	0	0.832453	0	-7.539	-1.7726	0.680049	0.953908	0.280916
UAP1	NP_001311045.1	UDP-N-acetylhexosamine pyrophosphorylase isoform b [Homo sapiens]	0.00013991	2.921e-05	0	0	0	0	-16.115	-5.4622	0.002528	0.842076	0.000223	-17.883	-24.3957	0	0.837673	0
ZXDC	NP_001035743.1	1 genes:ZXDC.NP_001035743.1:zinc finger protein ZXDC isoform 2 [Homo sapiens] ;NP_079388.3:zinc finger protein ZXDC isoform 1 [Homo sapiens] ;	1.469e-05	7.16e-06	0	0	0	0	-16.106	-35.6209	0	0.834557	0	-16.063	-29.9878	0	0.836939	0
IRGQ	NP_001007562.1	immunity-related GTPase family Q protein [Homo sapiens]	1.116e-05	8.16e-06	0	0	0	1.87e-05	-16.067	-46.1183	0	0.831559	0	-6.269	-1.8364	0.645298	0.95113	0.263755
SOX9	NP_000337.1	3 genes:SOX10,SOX8,SOX9.NP_000337.1:transcription factor SOX-9 [Homo sapiens] ;NP_008872.1:transcription factor SOX-10 [Homo sapiens] ;NP_055402.2:transcription factor SOX-8 [Homo sapiens] ;	2.05e-05	4.99e-06	0	0	0	4.58e-06	-15.989	-24.6017	0	0.837311	0	-7.567	-2.3529	0.395587	0.924855	0.151231
ANO2	NP_001265525.1	1 genes:ANO2.NP_001265525.1:anoctamin-2 isoform 1 [Homo sapiens] ;NP_001265526.1:anoctamin-2 isoform 2 [Homo sapiens] ;NP_001351720.1:anoctamin-2 isoform 3 [Homo sapiens] ;	1.04e-05	7.6e-06	0	0	1.425e-05	4.65e-06	-15.98	-50.8954	0	0.829576	0	-0.096	-0.1666	1	0.872133	0.775541
PATZ1	NP_055138.2	1 genes:PATZ1.NP_055138.2:POZ-, AT hook-, and zinc finger-containing protein 1 long C isoform [Homo sapiens] ;NP_114439.1:POZ-, AT hook-, and zinc finger-containing protein 1 long A isoform [Homo sapiens] ;NP_114441.1:POZ-, AT hook-, and zinc finger-containing protein 1 long B isoform [Homo sapiens] ;	1.012e-05	7.4e-06	0	0	2.427e-05	6.78e-06	-15.962	-41.1235	0	0.833227	0	0.375	0.5935	1	0.687151	0.936814
GIGYF1	NP_001362688.1	1 genes:GIGYF1.NP_001362688.1:GRB10-interacting GYF protein 1 isoform a [Homo sapiens] ;NP_001362694.1:GRB10-interacting GYF protein 1 isoform b [Homo sapiens] ;NP_001362696.1:GRB10-interacting GYF protein 1 isoform c [Homo sapiens] ;NP_001362697.1:GRB10-interacting GYF protein 1 isoform d [Homo sapiens] ;	1.616e-05	4.72e-06	0	0	4.43e-06	8.66e-06	-15.955	-26.8038	0	0.836798	0	-0.346	-0.4842	1	0.920504	0.681472
BCL6	NP_001124317.1	B-cell lymphoma 6 protein isoform 1 [Homo sapiens]	9.85e-06	7.2e-06	0	0	0	0	-15.945	-48.1995	0	0.830543	0	-15.926	-45.173	0	0.834691	0
NDUFS1	NP_001186910.1	1 genes:NDUFS1.NP_001186910.1:NADH-ubiquinone oxidoreductase 75 kDa subunit, mitochondrial isoform 2 precursor [Homo sapiens] ;NP_001186911.1:NADH-ubiquinone oxidoreductase 75 kDa subunit, mitochondrial isoform 3 [Homo sapiens] ;NP_001186912.1:NADH-ubiquinone oxidoreductase 75 kDa subunit, mitochondrial isoform 4 [Homo sapiens] ;NP_001186913.1:NADH-ubiquinone oxidoreductase 75 kDa subunit, mitoch…	1.007e-05	7.35e-06	0	0	1.379e-05	0	-15.941	-47.312	0	0.83096	0	-6.486	-1.6396	0.754362	0.958739	0.316963
ZYG11B	NP_078922.1	protein zyg-11 homolog B [Homo sapiens]	9.35e-06	6.83e-06	0	0	6.4e-06	9.4e-06	-15.897	-35.4375	0	0.834613	0	-0.037	-0.0928	1	0.85709	0.79708
ZBED4	NP_055653.2	zinc finger BED domain-containing protein 4 [Homo sapiens]	5.94e-06	1.085e-05	0	0	4.07e-06	3.98e-06	-15.879	-41.6059	0	0.833125	0	-0.699	-1.7192	0.709613	0.955965	0.29507
CDC42BPA	NP_001352939.1	serine/threonine-protein kinase MRCK alpha isoform D [Homo sapiens]	8.23e-06	7.51e-06	0	0	0	2.76e-06	-15.854	-44.3578	0	0.832332	0	-6.369	-1.784	0.673792	0.953369	0.277442
FER	NP_005237.2	tyrosine-protein kinase Fer isoform a [Homo sapiens]	8.46e-06	6.18e-06	0	0	0	0	-15.786	-53.1846	0	0.828821	0	-15.791	-46.9076	0	0.834342	0
RREB1	NP_001003698.1	1 genes:RREB1.NP_001003698.1:ras-responsive element-binding protein 1 isoform 2 [Homo sapiens] ;NP_001003699.1:ras-responsive element-binding protein 1 isoform 1 [Homo sapiens] ;NP_001003700.1:ras-responsive element-binding protein 1 isoform 3 [Homo sapiens] ;	6.18e-06	6.03e-06	0	0	0	0	-15.602	-62.6386	0	0.827951	0	-15.625	-49.2013	0	0.833665	0
AFF4	NP_055238.1	AF4/FMR2 family member 4 [Homo sapiens]	5.98e-06	4.37e-06	0	0	0	0	-15.425	-42.1939	0	0.832989	0	-15.414	-48.6045	0	0.833846	0
RSF1	NP_057662.3	remodeling and spacing factor 1 [Homo sapiens]	4.83e-06	5.29e-06	0	0	9.92e-06	0	-15.422	-46.3285	0	0.831457	0	-6.645	-2.1226	0.499097	0.93765	0.198304
RALGAPA1	NP_001317004.1	1 genes:RALGAPA1.NP_001317004.1:ral GTPase-activating protein subunit alpha-1 isoform 5 [Homo sapiens] ;NP_001333178.1:ral GTPase-activating protein subunit alpha-1 isoform 8 [Homo sapiens] ;	5.58e-06	3.06e-06	0	0	0	2.8e-06	-15.236	-38.2304	0	0.833818	0	-7.612	-2.306	0.415534	0.927736	0.160953
DMXL2	NP_001167587.1	1 genes:DMXL2.NP_001167587.1:dmX-like protein 2 isoform 1 [Homo sapiens] ;NP_056078.2:dmX-like protein 2 isoform 2 [Homo sapiens] ;	1.031e-05	1.67e-06	0	0	0	0	-15.228	-17.8213	0	0.838206	0	-15.076	-16.4899	0	0.838475	0
MT2A	NP_005944.1	metallothionein-2 [Homo sapiens]	0.00057012	0	0	0	0.00058575	0.0001146	-11.063	-2.7918	0.261369	0.904412	0.090704	8.892	2.354	0.498488	0.176892	0.961303
UBL5	NP_077268.1	ubiquitin-like protein 5 [Homo sapiens]	9.528e-05	0	0	0	0	0	-9.867	-2.5094	0.35968	0.919294	0.131884	-8.414	-2.5015	0.336372	0.916946	0.126524
ITGB3BP	NP_001193668.1	centromere protein R isoform 1 [Homo sapiens]	3.22e-05	0	0	0	0	0	-9.816	-2.6235	0.317416	0.913526	0.114884	-7.584	-2.0353	0.54181	0.941731	0.215886
FZR1	NP_001129669.1	1 genes:FZR1.NP_001129669.1:fizzy-related protein homolog isoform 3 [Homo sapiens] ;NP_001129670.1:fizzy-related protein homolog isoform 1 [Homo sapiens] ;NP_057347.2:fizzy-related protein homolog isoform 2 [Homo sapiens] ;	4.304e-05	5.032e-05	0	1.8e-05	0	4.037e-05	-9.444	-2.5027	0.362269	0.919294	0.131908	-7.795	-2.5594	0.314962	0.914099	0.118281
NUDT15	NP_060753.1	nucleotide triphosphate diphosphatase NUDT15 isoform 1 [Homo sapiens]	0	6.198e-05	0	0	7.262e-05	0.00012787	-9.221	-2.2112	0.486046	0.935178	0.187263	7.375	2.2157	0.566679	0.205203	0.968847
MPP2	NP_001265299.1	1 genes:MPP2.NP_001265299.1:MAGUK p55 subfamily member 2 isoform 1 [Homo sapiens] ;NP_001265301.1:MAGUK p55 subfamily member 2 isoform 4 [Homo sapiens] ;NP_001265302.1:MAGUK p55 subfamily member 2 isoform 2 [Homo sapiens] ;NP_001265303.1:MAGUK p55 subfamily member 2 isoform 6 [Homo sapiens] ;NP_001265305.2:MAGUK p55 subfamily member 2 isoform 8 [Homo sapiens] ;NP_005365.4:MAGUK p55 subfamily memb…	0	1.277e-05	0	0	0	1.561e-05	-9.219	-2.8631	0.239864	0.90103	0.08246	-1.337	-0.3675	1	0.904589	0.718043
C2orf76	NP_001309260.1	1 genes:C2orf76.NP_001309260.1:UPF0538 protein C2orf76 isoform 1 [Homo sapiens] ;NP_001309261.1:UPF0538 protein C2orf76 isoform 2 [Homo sapiens] ;	8.28e-05	0	0	0	0	7.397e-05	-9.156	-2.4122	0.398388	0.924383	0.148118	0.116	0.0316	1	0.832369	0.827598
UTP23	NP_115710.2	rRNA-processing protein UTP23 homolog [Homo sapiens]	4.19e-05	0	0	0	0	0	-9.094	-2.676	0.299128	0.910679	0.106998	-7.931	-2.3384	0.401691	0.925575	0.153635
ZNF121	NP_001295198.1	zinc finger protein 121 [Homo sapiens]	3.21e-05	6.52e-06	1.21e-06	0	2.22e-06	0	-9.073	-3.6249	0.084032	0.870439	0.024425	-8.268	-2.2816	0.426146	0.929172	0.165976
UBE2V1	NP_001027459.1	ubiquitin-conjugating enzyme E2 variant 1 isoform d [Homo sapiens]	4.732e-05	0	0	0	0	0	-9.021	-2.8643	0.239513	0.90103	0.082457	-7.442	-2.2318	0.448295	0.931317	0.173743
ATXN1	NP_001121636.1	ataxin-1 ATXN1 [Homo sapiens]	1.28e-05	1.871e-05	0	5.95e-06	8.77e-06	5.72e-06	-9.002	-2.3977	0.404372	0.92511	0.150544	-0.788	-2.264	0.433898	0.929888	0.168537
ZNF768	NP_078947.3	zinc finger protein 768 [Homo sapiens]	1.717e-05	0	0	0	4.41e-06	0	-9.001	-2.4042	0.401683	0.925111	0.150532	-0.775	-0.2292	1	0.883774	0.756925
CEP76	NP_001258918.1	1 genes:CEP76.NP_001258918.1:centrosomal protein of 76 kDa isoform b [Homo sapiens] ;NP_079175.2:centrosomal protein of 76 kDa isoform a [Homo sapiens] ;	1.191e-05	0	0	0	0	1.197e-05	-8.986	-2.3898	0.407656	0.925838	0.152983	-0.502	-0.1555	1	0.869707	0.779193
HNRNPD	NP_001003810.1	heterogeneous nuclear ribonucleoprotein D0 isoform d [Homo sapiens]	0.00016719	0	0	0	0.00023655	0	-8.924	-2.3926	0.406491	0.92511	0.150566	0.391	0.0916	1	0.817556	0.843552
COQ5	NP_115690.3	2-methoxy-6-polyprenyl-1,4-benzoquinol methylase, mitochondrial precursor [Homo sapiens]	0	3.108e-05	0	0	0	1.425e-05	-8.91	-2.72	0.284365	0.908567	0.10134	-1.825	-0.4949	1	0.922108	0.677335
DYNC2LI1	NP_001180393.1	1 genes:DYNC2LI1.NP_001180393.1:cytoplasmic dynein 2 light intermediate chain 1 isoform 4 [Homo sapiens] ;NP_001335841.1:cytoplasmic dynein 2 light intermediate chain 1 isoform 5 [Homo sapiens] ;NP_001335842.1:cytoplasmic dynein 2 light intermediate chain 1 isoform 6 [Homo sapiens] ;NP_057092.2:cytoplasmic dynein 2 light intermediate chain 1 isoform 1 [Homo sapiens] ;	3.952e-05	2.888e-05	0	2.755e-05	0	2.648e-05	-8.88	-2.5107	0.359179	0.919294	0.131881	-8.922	-2.6084	0.297573	0.91128	0.110449
DHX34	NP_055496.2	probable ATP-dependent RNA helicase DHX34 [Homo sapiens]	1.217e-05	8.89e-06	0	4.24e-06	1.042e-05	6.12e-06	-8.877	-2.5075	0.360413	0.919294	0.131889	-0.254	-0.5568	1	0.928212	0.660615
TXNDC9	NP_005774.2	thioredoxin domain-containing protein 9 [Homo sapiens]	9.233e-05	0	0	0	0	3.093e-05	-8.828	-2.45	0.383042	0.9222	0.141016	-1.436	-0.3171	1	0.896662	0.733836
VIPAS39	NP_001180245.1	1 genes:VIPAS39.NP_001180245.1:spermatogenesis-defective protein 39 homolog isoform 2 [Homo sapiens] ;NP_001180246.1:spermatogenesis-defective protein 39 homolog isoform 1 [Homo sapiens] ;	2.35e-05	0	0	0	0	0	-8.808	-2.1474	0.5159	0.937972	0.198745	-7.862	-2.4074	0.373161	0.921972	0.14189
C10orf88	NP_079218.2	ATPase PAAT [Homo sapiens]	0	1.142e-05	0	0	0	0	-8.758	-2.6635	0.303416	0.911388	0.108932	-6.083	-1.6331	0.758046	0.959166	0.320672
DPM1	NP_001303963.1	1 genes:DPM1.NP_001303963.1:dolichol-phosphate mannosyltransferase subunit 1 isoform 1 [Homo sapiens] ;NP_001303964.1:dolichol-phosphate mannosyltransferase subunit 1 isoform 2 [Homo sapiens] ;NP_001303965.1:dolichol-phosphate mannosyltransferase subunit 1 isoform 4 [Homo sapiens] ;NP_003850.1:dolichol-phosphate mannosyltransferase subunit 1 isoform 3 [Homo sapiens] ;	2.358e-05	2.584e-05	0	3.287e-05	0	1.58e-05	-8.734	-2.984	0.206367	0.895158	0.069062	-7.677	-2.1701	0.476629	0.934859	0.187128
GFER	NP_005253.3	FAD-linked sulfhydryl oxidase ALR [Homo sapiens]	0.00013572	0	0	0	0	0	-8.73	-2.5807	0.332865	0.915679	0.121066	-8.085	-1.669	0.737749	0.957861	0.30957
MEIS1	NP_002389.1	homeobox protein Meis1 [Homo sapiens]	4.076e-05	2.085e-05	0	1.243e-05	3.141e-05	1.195e-05	-8.676	-2.2711	0.458883	0.931619	0.17357	-0.431	-0.8138	1	0.951193	0.574761
GEMIN8	NP_001035945.1	gem-associated protein 8 [Homo sapiens]	5.748e-05	3.15e-05	0	2.003e-05	0	1.926e-05	-8.666	-1.947	0.615313	0.947824	0.24542	-7.495	-2.0691	0.525061	0.940388	0.209908
BOLA1	NP_057158.1	bolA-like protein 1 precursor [Homo sapiens]	0.00010154	0	0	0	8.694e-05	3.402e-05	-8.635	-2.0271	0.574615	0.944029	0.226049	8.088	2.1407	0.60543	0.223444	0.973144
ZFAND1	NP_001164267.1	1 genes:ZFAND1.NP_001164267.1:AN1-type zinc finger protein 1 isoform b [Homo sapiens] ;NP_001164268.1:AN1-type zinc finger protein 1 isoform c [Homo sapiens] ;NP_078975.2:AN1-type zinc finger protein 1 isoform a [Homo sapiens] ;	5.33e-05	0	0	0	0	0	-8.632	-2.8748	0.236461	0.900364	0.080888	-8.825	-2.5464	0.319687	0.914809	0.120302
IFIT1	NP_001257856.1	1 genes:IFIT1.NP_001257856.1:interferon-induced protein with tetratricopeptide repeats 1 isoform 2 [Homo sapiens] ;NP_001257858.1:interferon-induced protein with tetratricopeptide repeats 1 isoform 3 [Homo sapiens] ;NP_001539.3:interferon-induced protein with tetratricopeptide repeats 1 isoform 1 [Homo sapiens] ;	2.183e-05	0	0	0	0	1.462e-05	-8.623	-2.039	0.568673	0.943375	0.222916	0.198	0.0534	1	0.826535	0.834068
TTF2	NP_003585.3	transcription termination factor 2 [Homo sapiens]	5.99e-06	0	0	0	4.1e-06	0	-8.619	-2.7991	0.259106	0.904412	0.090685	0.579	0.1415	1	0.808309	0.852765
PRPF18	NP_003666.1	pre-mRNA-splicing factor 18 [Homo sapiens]	6.101e-05	2.229e-05	0	1.418e-05	2.786e-05	3.407e-05	-8.606	-2.1537	0.51291	0.937974	0.198722	-0.175	-0.3356	1	0.900689	0.725987
UBOX5	NP_001254513.1	1 genes:UBOX5.NP_001254513.1:RING finger protein 37 isoform c [Homo sapiens] ;NP_055763.1:RING finger protein 37 isoform a [Homo sapiens] ;NP_955447.1:RING finger protein 37 isoform b [Homo sapiens] ;	0	9.93e-06	0	0	0	1.365e-05	-8.605	-2.4843	0.369439	0.920746	0.136386	1.615	0.4291	1	0.732999	0.911555
NAA40	NP_001287729.1	1 genes:NAA40.NP_001287729.1:N-alpha-acetyltransferase 40 isoform 2 [Homo sapiens] ;NP_079047.2:N-alpha-acetyltransferase 40 isoform 1 [Homo sapiens] ;	6.44e-05	0	0	0	0	0	-8.576	-2.6383	0.312187	0.912811	0.112874	-9.945	-2.5511	0.317974	0.914099	0.118306
TIAL1	NP_001029097.1	nucleolysin TIAR isoform 2 [Homo sapiens]	0	4.263e-05	0	0	0	0	-8.573	-2.4065	0.400734	0.924383	0.148141	-7.445	-2.0331	0.54291	0.941731	0.215898
KBTBD3	NP_001317288.1	1 genes:KBTBD3.NP_001317288.1:kelch repeat and BTB domain-containing protein 3 isoform 2 [Homo sapiens] ;NP_940841.1:kelch repeat and BTB domain-containing protein 3 isoform 1 [Homo sapiens] ;	1.305e-05	0	0	0	0	0	-8.553	-2.2089	0.487106	0.935178	0.187267	-8.731	-2.5895	0.304202	0.912686	0.11431
RAPGEF6	NP_001157858.1	1 genes:RAPGEF6.NP_001157858.1:rap guanine nucleotide exchange factor 6 isoform 1 [Homo sapiens] ;NP_057424.3:rap guanine nucleotide exchange factor 6 isoform 2 [Homo sapiens] ;	8.65e-06	0	0	0	0	0	-8.548	-2.3224	0.436312	0.929462	0.165633	-7.975	-2.9843	0.185946	0.892784	0.065774
ARPC5L	NP_112240.1	actin-related protein 2/3 complex subunit 5-like protein [Homo sapiens]	0.0002273	3.322e-05	8.475e-05	0	0	0	-8.536	-2.1981	0.4921	0.935882	0.190086	-17.922	-17.9132	0	0.838363	0
ANKZF1	NP_001035869.1	ankyrin repeat and zinc finger domain-containing protein 1 isoform 1 [Homo sapiens]	2.874e-05	1.75e-05	0	1.002e-05	6.56e-06	1.926e-05	-8.531	-2.6927	0.293465	0.909973	0.105086	-0.726	-1.1319	1	0.963848	0.470549
TPM4	NP_001138632.1	tropomyosin alpha-4 chain isoform Tpm4.1cy [Homo sapiens]	8.362e-05	0	0	0	0	0	-8.516	-2.5702	0.33673	0.9164	0.123175	-8.597	-2.6085	0.297538	0.91128	0.110449
DUSP11	NP_003575.2	RNA/RNP complex-1-interacting phosphatase [Homo sapiens]	3.69e-05	5.392e-05	1.376e-05	0	0	1.854e-05	-8.511	-2.351	0.424012	0.927289	0.158	-7.802	-2.0252	0.546866	0.942398	0.218889
PLEKHM1	NP_001339754.1	1 genes:PLEKHM1.NP_001339754.1:pleckstrin homology domain-containing family M member 1 isoform 2 [Homo sapiens] ;NP_055613.1:pleckstrin homology domain-containing family M member 1 isoform 1 [Homo sapiens] ;	8.15e-06	0	0	0	0	0	-8.506	-2.3563	0.421755	0.927289	0.157976	-7.752	-2.488	0.341499	0.917661	0.128644
BOD1	NP_612378.1	biorientation of chromosomes in cell division protein 1 isoform a [Homo sapiens]	5.64e-05	4.121e-05	2.804e-05	0	2.575e-05	3.779e-05	-8.499	-2.4817	0.370459	0.920746	0.136391	-0.434	-1.1378	1	0.963851	0.470528
C1orf131	NP_001287759.1	1 genes:C1orf131.NP_001287759.1:uncharacterized protein C1orf131 isoform b [Homo sapiens] ;NP_689592.2:uncharacterized protein C1orf131 isoform a [Homo sapiens] ;	0	2.611e-05	0	0	0	0	-8.495	-3.2396	0.147184	0.884374	0.047251	-8.81	-2.3596	0.392786	0.924855	0.151209
BLOC1S5	NP_958437.1	biogenesis of lysosome-related organelles complex 1 subunit 5 isoform 1 [Homo sapiens]	9.299e-05	0	0	0	7.643e-05	4.984e-05	-8.481	-2.47	0.375073	0.921473	0.138679	6.613	1.8702	0.753451	0.290481	0.985482
MSTO1	NP_001243461.1	1 genes:MSTO1.NP_001243461.1:protein misato homolog 1 isoform b [Homo sapiens] ;NP_001337704.1:protein misato homolog 1 isoform 7 [Homo sapiens] ;NP_060586.2:protein misato homolog 1 isoform a [Homo sapiens] ;	4.278e-05	0	0	0	1.256e-05	0	-8.468	-2.4392	0.387389	0.922928	0.14335	-1.124	-0.27	1	0.890364	0.74548
ZNF70	NP_068735.1	zinc finger protein 70 [Homo sapiens]	3.119e-05	0	0	0	0	0	-8.466	-2.0638	0.556382	0.942052	0.216728	-7.609	-2.7147	0.262142	0.90575	0.095906
DLG2	NP_001136171.1	disks large homolog 2 isoform 1 [Homo sapiens]	0	3.78e-06	0	0	0	0	-8.458	-2.6142	0.320731	0.913526	0.114906	-6.514	-1.7673	0.682965	0.953907	0.280942
TGFB2	NP_003229.1	transforming growth factor beta-2 proprotein isoform 2 preproprotein [Homo sapiens]	5.04e-05	0	0	0	0	2.064e-05	-8.456	-2.2357	0.474833	0.933761	0.181701	-1.145	-0.2533	1	0.88601	0.753124
PCGF2	NP_001356544.1	polycomb group RING finger protein 2 [Homo sapiens]	4.044e-05	2.955e-05	0	1.409e-05	1.385e-05	1.355e-05	-8.452	-2.257	0.4652	0.932335	0.176262	-0.93	-2.724	0.259191	0.90507	0.094205
ZNHIT3	NP_001268361.1	1 genes:ZNHIT3.NP_001268361.1:zinc finger HIT domain-containing protein 3 isoform 2 [Homo sapiens] ;NP_001268362.1:zinc finger HIT domain-containing protein 3 isoform 4 [Homo sapiens] ;NP_004764.1:zinc finger HIT domain-containing protein 3 isoform 1 [Homo sapiens] ;	0	6.868e-05	0	0	9.657e-05	4.723e-05	-8.451	-2.1015	0.537941	0.940712	0.210597	6.871	1.7334	0.831657	0.331158	0.990392
MBNL2	NP_001292999.1	muscleblind-like protein 2 isoform 4 [Homo sapiens]	0.00011603	0	0	0	0	0	-8.413	-2.7441	0.276495	0.907171	0.097695	-8.554	-2.9218	0.20192	0.895263	0.071148
MOB3A	NP_570719.1	MOB kinase activator 3A [Homo sapiens]	3.205e-05	0	0	0	0	0	-8.405	-2.9397	0.218214	0.897731	0.074781	-8.734	-2.3218	0.408748	0.927017	0.158475
MCRIP1	NP_001275727.1	1 genes:MCRIP1.NP_001275727.1:mapk-regulated corepressor-interacting protein 1 isoform 1 [Homo sapiens] ;NP_997251.2:mapk-regulated corepressor-interacting protein 1 isoform 2 [Homo sapiens] ;	5.894e-05	0	0	0	6.056e-05	0	-8.374	-1.9095	0.634763	0.949631	0.255443	0.882	0.2704	1	0.775642	0.881444
RBMXL1	NP_001156008.1	RNA binding motif protein, X-linked-like-1 [Homo sapiens]	1.267e-05	0	0	0	9.97e-06	0	-8.369	-2.3084	0.442408	0.930183	0.168243	-0.41	-0.096	1	0.859675	0.793559
TJAP1	NP_001337491.1	1 genes:TJAP1.NP_001337491.1:tight junction-associated protein 1 isoform a [Homo sapiens] ;NP_001337498.1:tight junction-associated protein 1 isoform b [Homo sapiens] ;	4.995e-05	1.825e-05	0	8.7e-06	2.566e-05	0	-8.354	-1.7689	0.709622	0.955098	0.290461	-8.047	-2.7246	0.259001	0.90507	0.094203
ZC2HC1A	NP_057094.2	zinc finger C2HC domain-containing protein 1A isoform 1 [Homo sapiens]	2.14e-05	0	0	0	0	2.151e-05	-8.338	-2.3455	0.426361	0.928014	0.160498	-0.918	-0.2275	1	0.881517	0.760688
CDKN1B	NP_004055.1	cyclin-dependent kinase inhibitor 1B [Homo sapiens]	0	2.567e-05	0	0	0	0	-8.335	-1.5638	0.82275	0.961249	0.347172	-7.96	-2.5489	0.318775	0.914809	0.1203
UAP1L1	NP_997192.2	UDP-N-acetylhexosamine pyrophosphorylase-like protein 1 [Homo sapiens]	2.058e-05	0	0	0	0	0	-8.328	-2.5988	0.326273	0.914242	0.116948	-7.854	-2.5206	0.329206	0.916232	0.124416
ZNF771	NP_001135777.1	zinc finger protein 771 [Homo sapiens]	5.485e-05	2.004e-05	1.227e-05	0	2.254e-05	0	-8.327	-2.7507	0.274367	0.906478	0.095926	-8.2	-2.0795	0.51996	0.939708	0.206975
PNPLA2	NP_065109.1	patatin-like phospholipase domain-containing protein 2 [Homo sapiens]	2.07e-05	0	0	0	9.45e-06	2.774e-05	-8.323	-2.8515	0.243273	0.9017	0.084056	6.468	1.7521	0.820892	0.323567	0.989627
IFI35	NP_001317159.1	1 genes:IFI35.NP_001317159.1:interferon-induced 35 kDa protein isoform 2 [Homo sapiens] ;NP_005524.2:interferon-induced 35 kDa protein isoform 1 [Homo sapiens] ;	7.296e-05	0	0	0	0	0	-8.32	-2.4585	0.379643	0.922201	0.140994	-8.143	-2.2272	0.450373	0.93203	0.17634
ARHGAP23	NP_001186346.1	rho GTPase-activating protein 23 [Homo sapiens]	7e-06	0	0	0	3.2e-06	0	-8.318	-2.3938	0.405991	0.92511	0.15056	-1.332	-0.3395	1	0.90069	0.725981
BRAP	NP_006759.3	BRCA1-associated protein [Homo sapiens]	1.175e-05	1.717e-05	0	8.19e-06	8.05e-06	1.574e-05	-8.3	-2.4361	0.388642	0.922928	0.143362	-0.216	-0.3936	1	0.908356	0.710034
TJP1	NP_001317168.1	tight junction protein ZO-1 isoform e [Homo sapiens]	4.918e-05	5.965e-05	4.107e-05	0	5.861e-05	4.02e-05	-8.292	-2.5632	0.339322	0.916399	0.123185	-0.109	-0.33	1	0.898694	0.729916
TUBB4A	NP_001276052.1	tubulin beta-4A chain isoform 1 [Homo sapiens]	0	6.674e-05	0	0	0	0	-8.256	-2.7207	0.284135	0.908567	0.101339	-7.978	-2.2444	0.442629	0.931319	0.173707
HDDC3	NP_001273380.1	1 genes:HDDC3.NP_001273380.1:guanosine-3',5'-bis(diphosphate) 3'-pyrophosphohydrolase MESH1 isoform 1 [Homo sapiens] ;NP_940929.1:guanosine-3',5'-bis(diphosphate) 3'-pyrophosphohydrolase MESH1 isoform 2 [Homo sapiens] ;	7.771e-05	0	0	0	0	6.509e-05	-8.251	-2.5162	0.357065	0.918569	0.129695	0.694	0.1624	1	0.802	0.858754
SIX1	NP_005973.1	homeobox protein SIX1 [Homo sapiens]	4.898e-05	1.79e-05	1.826e-05	0	0	1.641e-05	-8.247	-3.0505	0.18949	0.892645	0.063644	-8.317	-1.9131	0.604456	0.947539	0.243955
TIMP1	NP_003245.1	metalloproteinase inhibitor 1 precursor [Homo sapiens]	0	4.91e-05	0	0	0	0	-8.242	-2.2814	0.4543	0.931621	0.173544	-8.213	-2.748	0.251683	0.904393	0.092492
ZNF561	NP_001317294.1	zinc finger protein 561 isoform 2 [Homo sapiens]	2.502e-05	2.742e-05	0	5.81e-06	1.523e-05	5.59e-06	-8.233	-2.4978	0.36417	0.92002	0.13412	-1.064	-2.113	0.503706	0.937648	0.198337
TNK2	NP_001010938.2	1 genes:TNK2.NP_001010938.2:activated CDC42 kinase 1 isoform 2 [Homo sapiens] ;NP_001294975.1:activated CDC42 kinase 1 isoform 3 [Homo sapiens] ;NP_005772.3:activated CDC42 kinase 1 isoform 1 [Homo sapiens] ;	9.96e-06	0	0	0	0	0	-8.231	-2.8662	0.238959	0.90103	0.082453	-8.345	-2.5605	0.314564	0.914099	0.11828
EMC1	NP_001258356.1	1 genes:EMC1.NP_001258356.1:ER membrane protein complex subunit 1 isoform 2 precursor [Homo sapiens] ;NP_001258357.1:ER membrane protein complex subunit 1 isoform 3 precursor [Homo sapiens] ;NP_001258358.1:ER membrane protein complex subunit 1 isoform 4 precursor [Homo sapiens] ;NP_001362749.1:ER membrane protein complex subunit 1 isoform 5 precursor [Homo sapiens] ;NP_001362750.1:ER membrane pro…	7.01e-06	0	0	0	1.921e-05	0	-8.222	-2.2985	0.446747	0.930181	0.168269	0.741	0.1558	1	0.805169	0.855775
ERI3	NP_001288627.1	1 genes:ERI3.NP_001288627.1:ERI1 exoribonuclease 3 isoform 2 [Homo sapiens] ;NP_001288630.1:ERI1 exoribonuclease 3 isoform 4 [Homo sapiens] ;NP_076971.1:ERI1 exoribonuclease 3 isoform 1 [Homo sapiens] ;	8.056e-05	5.887e-05	0	2.808e-05	0	7.197e-05	-8.219	-2.2706	0.459107	0.931619	0.173572	-8.897	-2.6955	0.268312	0.907117	0.099391
SCRN3	NP_001180457.1	1 genes:SCRN3.NP_001180457.1:secernin-3 isoform 2 [Homo sapiens] ;NP_078859.2:secernin-3 isoform 1 [Homo sapiens] ;	2.502e-05	0	0	0	1.142e-05	2.794e-05	-8.211	-2.1711	0.504702	0.937281	0.195814	7.368	1.8932	0.740464	0.286939	0.984954
DDX58	NP_055129.2	probable ATP-dependent RNA helicase DDX58 [Homo sapiens]	1.88e-05	5.49e-06	5.61e-06	0	5.15e-06	0	-8.203	-2.8575	0.241506	0.9017	0.084048	-6.7	-1.7147	0.712122	0.955964	0.295092
ZNF217	NP_006517.1	zinc finger protein 217 [Homo sapiens]	9.96e-06	7.27e-06	0	4.63e-06	0	0	-8.203	-2.5072	0.360529	0.919294	0.13189	-15.94	-47.4562	0	0.834194	0
SPTY2D1	NP_919261.2	protein SPT2 homolog [Homo sapiens]	5.077e-05	0	0	0	0	1.361e-05	-8.201	-1.7212	0.735602	0.956545	0.301445	-1.765	-0.4321	1	0.913758	0.69789
TMPO	NP_001294904.1	thymopoietin isoform delta [Homo sapiens]	1.54e-05	0	0	0	0	0	-8.198	-2.0508	0.56281	0.942716	0.219812	-7.081	-1.7332	0.701824	0.955466	0.291495
MAP4K3	NP_001257354.1	1 genes:MAP4K3.NP_001257354.1:mitogen-activated protein kinase kinase kinase kinase 3 isoform 2 [Homo sapiens] ;NP_003609.2:mitogen-activated protein kinase kinase kinase kinase 3 isoform 1 [Homo sapiens] ;	3.984e-05	0	0	0	0	0	-8.19	-2.4267	0.392457	0.923656	0.145718	-8.108	-2.0868	0.516396	0.939024	0.204086
CPT2	NP_000089.1	1 genes:CPT2.NP_000089.1:carnitine O-palmitoyltransferase 2, mitochondrial isoform 1 precursor [Homo sapiens] ;NP_001317518.1:carnitine O-palmitoyltransferase 2, mitochondrial isoform 2 precursor [Homo sapiens] ;	0	7.72e-06	0	0	1.086e-05	1.062e-05	-8.177	-2.4089	0.399745	0.924383	0.148129	6.956	2.0427	0.657716	0.245818	0.977862
DPY19L1	NP_001353602.1	1 genes:DPY19L1.NP_001353602.1:probable C-mannosyltransferase DPY19L1 isoform 1 [Homo sapiens] ;NP_056098.1:probable C-mannosyltransferase DPY19L1 isoform 2 [Homo sapiens] ;	9.3e-06	0	0	0	0	0	-8.171	-2.8279	0.250316	0.90305	0.08732	-8.887	-2.3498	0.396887	0.925576	0.153602
TRAPPC1	NP_067033.1	trafficking protein particle complex subunit 1 [Homo sapiens]	4.797e-05	7.01e-05	3.577e-05	0	4.928e-05	6.428e-05	-8.16	-2.0822	0.547344	0.941384	0.213645	-0.064	-0.1807	1	0.874527	0.771864
SEC14L2	NP_036561.1	SEC14-like protein 2 isoform 1 [Homo sapiens]	6.904e-05	1.261e-05	2.574e-05	0	1.182e-05	1.156e-05	-8.148	-3.0862	0.180868	0.890804	0.059815	-0.917	-0.8529	1	0.953614	0.561694
FAM114A2	NP_001304923.1	protein FAM114A2 isoform 1 [Homo sapiens]	2.755e-05	1.006e-05	0	9.6e-06	0	1.384e-05	-8.148	-2.6776	0.298583	0.910679	0.106996	-6.59	-2.0911	0.514301	0.939025	0.204066
ATP6V1B1	NP_001683.2	V-type proton ATPase subunit B, kidney isoform [Homo sapiens]	0	6.3e-06	0	0	0	0	-8.144	-2.4378	0.387954	0.922928	0.143355	-7.089	-2.2258	0.451006	0.93203	0.176343
CCNY	NP_001269781.1	1 genes:CCNY.NP_001269781.1:cyclin-Y isoform 3 [Homo sapiens] ;NP_659449.3:cyclin-Y isoform 1 [Homo sapiens] ;NP_859049.2:cyclin-Y isoform 2 [Homo sapiens] ;	2.201e-05	1.608e-05	2.462e-05	0	0	1.475e-05	-8.129	-1.9641	0.606525	0.947209	0.24212	-7.043	-1.8303	0.648592	0.951705	0.267119
IBA57	NP_001010867.1	putative transferase CAF17, mitochondrial isoform 1 precursor [Homo sapiens]	6.838e-05	4.283e-05	0	4.767e-05	2.007e-05	7.2e-05	-8.124	-1.7751	0.706264	0.954592	0.286886	-0.333	-0.5232	1	0.925222	0.669005
RPP38	NP_001091059.1	ribonuclease P protein subunit p38 [Homo sapiens]	2.458e-05	0	0	0	0	0	-8.121	-2.7029	0.290041	0.909269	0.103204	-7.08	-1.6764	0.733582	0.957401	0.305933
STAMBPL1	NP_065850.1	AMSH-like protease [Homo sapiens]	4.786e-05	1.748e-05	2.379e-05	0	3.278e-05	1.603e-05	-8.111	-2.5604	0.340363	0.916399	0.123194	-0.23	-0.383	1	0.906491	0.714045
TUFT1	NP_001119809.1	1 genes:TUFT1.NP_001119809.1:tuftelin isoform 2 [Homo sapiens] ;NP_001288246.1:tuftelin isoform 3 [Homo sapiens] ;NP_064512.1:tuftelin isoform 1 [Homo sapiens] ;	1.906e-05	0	0	0	0	0	-8.11	-2.9911	0.204513	0.895158	0.069046	-6.817	-1.7906	0.670179	0.953372	0.277422
ZBTB14	NP_001137295.1	zinc finger and BTB domain-containing protein 14 [Homo sapiens]	0	3.396e-05	0	0	2.122e-05	1.038e-05	-8.106	-2.0952	0.541002	0.94071	0.210612	6.378	1.7372	0.829467	0.327335	0.99002
AUP1	NP_853553.1	ancient ubiquitous protein 1 [Homo sapiens]	3.393e-05	1.859e-05	0	5.913e-05	1.743e-05	2.842e-05	-8.099	-2.8785	0.235391	0.900364	0.080878	-0.132	-0.2811	1	0.892495	0.741625
RIOK2	NP_001153221.1	1 genes:RIOK2.NP_001153221.1:serine/threonine-protein kinase RIO2 isoform 2 [Homo sapiens] ;NP_060813.2:serine/threonine-protein kinase RIO2 isoform 1 [Homo sapiens] ;	2.935e-05	0	0	0	0	0	-8.086	-1.9502	0.613665	0.947826	0.245414	-8.269	-1.812	0.65851	0.952267	0.270544
TNFRSF10B	NP_003833.4	1 genes:TNFRSF10B.NP_003833.4:tumor necrosis factor receptor superfamily member 10B isoform 1 precursor [Homo sapiens] ;NP_671716.2:tumor necrosis factor receptor superfamily member 10B isoform 2 precursor [Homo sapiens] ;	0	1.155e-05	0	0	0	1.059e-05	-8.084	-2.0752	0.550775	0.942055	0.216693	-0.949	-0.2752	1	0.890367	0.745474
RAD23A	NP_001257291.1	UV excision repair protein RAD23 homolog A isoform 2 [Homo sapiens]	0	2.106e-05	0	0	2.854e-05	2.026e-05	-8.07	-2.2479	0.469302	0.933049	0.178961	6.221	1.621	0.896577	0.362149	0.992853
CDC42EP2	NP_006770.1	cdc42 effector protein 2 [Homo sapiens]	3.312e-05	6.05e-05	0	3.463e-05	2.269e-05	3.329e-05	-8.058	-2.4125	0.398264	0.924383	0.148117	-0.538	-1.3718	0.908317	0.964558	0.395073
PRR16	NP_001287712.1	1 genes:PRR16.NP_001287712.1:protein Largen isoform 1 [Homo sapiens] ;NP_001295016.1:protein Largen isoform 3 [Homo sapiens] ;NP_057728.1:protein Largen isoform 2 [Homo sapiens] ;	3.432e-05	4.179e-05	0	3.987e-05	0	4.599e-05	-8.042	-2.2773	0.456121	0.93162	0.173549	-6.568	-1.7635	0.685058	0.954439	0.284408
TRIM16	NP_006461.3	tripartite motif-containing protein 16 isoform a [Homo sapiens]	3.7e-05	1.352e-05	1.839e-05	0	0	1.239e-05	-8.039	-2.4676	0.376023	0.921473	0.138684	-6.662	-1.9547	0.582778	0.945653	0.234368
ZNF664	NP_689650.1	zinc finger protein 664 [Homo sapiens]	0	2.062e-05	0	0	0	0	-8.038	-2.3241	0.435575	0.928738	0.163084	-9.006	-3.0348	0.173753	0.890369	0.06074
MINK1	NP_001020108.1	misshapen-like kinase 1 isoform 4 [Homo sapiens]	3.24e-05	2.25e-06	0	2.14e-06	0	8.2e-06	-8.023	-2.9495	0.215551	0.897082	0.073318	-7.667	-2.028	0.545462	0.942399	0.218882
GOLIM4	NP_001295084.1	1 genes:GOLIM4.NP_001295084.1:Golgi integral membrane protein 4 isoform 2 [Homo sapiens] ;NP_055313.1:Golgi integral membrane protein 4 isoform 1 [Homo sapiens] ;	1.562e-05	1.141e-05	7.76e-06	0	1.783e-05	1.395e-05	-8.022	-2.7174	0.285223	0.908567	0.101342	0.184	0.5035	1	0.710429	0.9248
RPUSD4	NP_001138299.1	1 genes:RPUSD4.NP_001138299.1:mitochondrial RNA pseudouridine synthase RPUSD4 isoform b [Homo sapiens] ;NP_001350445.1:mitochondrial RNA pseudouridine synthase RPUSD4 isoform c [Homo sapiens] ;NP_116184.2:mitochondrial RNA pseudouridine synthase RPUSD4 isoform a [Homo sapiens] ;	4.02e-05	1.469e-05	3.748e-05	0	0	2.02e-05	-8.019	-2.4697	0.375192	0.921473	0.138679	-7.204	-1.9559	0.582158	0.945654	0.234362
SNX24	NP_054754.1	sorting nexin-24 [Homo sapiens]	4.116e-05	0	0	0	0	0	-8.016	-2.2031	0.489784	0.935177	0.187286	-8.791	-2.2397	0.444737	0.931317	0.173712
UBE3B	NP_569733.2	ubiquitin-protein ligase E3B isoform 1 [Homo sapiens]	1.303e-05	9.52e-06	0	4.54e-06	0	1.091e-05	-8.015	-2.3709	0.415575	0.926564	0.15547	-6.489	-1.5553	0.802442	0.961085	0.339634
RGS3	NP_001263190.1	1 genes:RGS3.NP_001263190.1:regulator of G-protein signaling 3 isoform 7 [Homo sapiens] ;NP_001269852.1:regulator of G-protein signaling 3 isoform 8 precursor [Homo sapiens] ;NP_001309143.1:regulator of G-protein signaling 3 isoform 9 [Homo sapiens] ;NP_060260.3:regulator of G-protein signaling 3 isoform 3 [Homo sapiens] ;NP_570613.2:regulator of G-protein signaling 3 isoform 1 [Homo sapiens] ;NP…	0	1.29e-05	0	0	0	0	-8.015	-2.1414	0.518754	0.938664	0.20165	-7.024	-2.1089	0.50568	0.93834	0.201167
BASP1	NP_006308.3	brain acid soluble protein 1 [Homo sapiens]	6.128e-05	0	0	0	3.148e-05	5.132e-05	-8.01	-2.4772	0.37223	0.920746	0.136406	6.647	2.0988	0.627569	0.232887	0.97521
IKZF4	NP_001338018.1	1 genes:IKZF4.NP_001338018.1:zinc finger protein Eos isoform a [Homo sapiens] ;NP_001338019.1:zinc finger protein Eos isoform b [Homo sapiens] ;NP_001338020.1:zinc finger protein Eos isoform c [Homo sapiens] ;NP_001338021.1:zinc finger protein Eos isoform d [Homo sapiens] ;	2.378e-05	0	0	0	0	0	-8.002	-2.5243	0.353965	0.918569	0.129667	-7.07	-2.123	0.498906	0.93765	0.198304
ZNF326	NP_861446.2	DBIRD complex subunit ZNF326 isoform 2 [Homo sapiens]	0	4.731e-05	0	0	8.236e-05	0	-8.002	-2.2547	0.466235	0.933051	0.178951	0.498	0.1285	1	0.811421	0.849725
AGL	NP_000633.2	1 genes:AGL.NP_000633.2:glycogen debranching enzyme isoform 1 [Homo sapiens] ;NP_000637.2:glycogen debranching enzyme isoform 3 [Homo sapiens] ;	2.497e-05	8.29e-06	0	3.16e-06	3.11e-06	1.825e-05	-8.001	-2.8215	0.252251	0.90305	0.087333	-0.704	-0.7121	1	0.943462	0.609444
RGL2	NP_001230667.1	1 genes:RGL2.NP_001230667.1:ral guanine nucleotide dissociation stimulator-like 2 isoform 2 [Homo sapiens] ;NP_004752.1:ral guanine nucleotide dissociation stimulator-like 2 isoform 1 [Homo sapiens] ;	1.001e-05	0	0	0	0	0	-8.001	-1.8948	0.642452	0.950217	0.258837	-6.795	-2.15	0.486068	0.936261	0.192657
ARHGEF26	NP_001238892.1	1 genes:ARHGEF26.NP_001238892.1:rho guanine nucleotide exchange factor 26 isoform 2 [Homo sapiens] ;NP_056410.3:rho guanine nucleotide exchange factor 26 isoform 1 [Homo sapiens] ;	8.79e-06	0	0	0	0	5.89e-06	-7.998	-2.2832	0.453502	0.930901	0.170914	-1.68	-0.4412	1	0.915493	0.693817
ZNF3	NP_001265220.1	1 genes:ZNF3.NP_001265220.1:zinc finger protein 3 isoform 3 [Homo sapiens] ;NP_001349704.1:zinc finger protein 3 isoform 4 [Homo sapiens] ;NP_001349705.1:zinc finger protein 3 isoform 6 [Homo sapiens] ;NP_001358142.1:zinc finger protein 3 isoform 2 [Homo sapiens] ;NP_001358147.1:zinc finger protein 3 isoform 7 [Homo sapiens] ;	5.089e-05	0	0	0	0	0	-7.992	-2.5401	0.347969	0.917845	0.127476	-6.453	-1.7127	0.713238	0.956459	0.298649
TXNDC17	NP_116120.1	thioredoxin domain-containing protein 17 [Homo sapiens]	0.00033929	6.198e-05	0.00012651	0	3.873e-05	7.578e-05	-7.987	-2.3571	0.421415	0.927289	0.157974	-0.972	-1.1561	1	0.964075	0.466238
HS1BP3	NP_071905.3	HCLS1-binding protein 3 [Homo sapiens]	3.549e-05	0	0	0	0	0	-7.984	-2.2956	0.448023	0.930903	0.17088	-7.796	-2.2627	0.434474	0.929888	0.168541
GLMP	NP_001243533.1	1 genes:GLMP.NP_001243533.1:glycosylated lysosomal membrane protein isoform 2 precursor [Homo sapiens] ;NP_001243537.1:glycosylated lysosomal membrane protein isoform 4 precursor [Homo sapiens] ;NP_653181.1:glycosylated lysosomal membrane protein isoform 1 precursor [Homo sapiens] ;	4.871e-05	2.135e-05	1.453e-05	0	0	0	-7.98	-2.426	0.392742	0.923655	0.14572	-17.264	-31.8785	0	0.836607	0
BICC1	NP_001073981.1	protein bicaudal C homolog 1 [Homo sapiens]	1.785e-05	1.044e-05	5.33e-06	0	0	0	-7.978	-2.7972	0.259694	0.904412	0.090688	-16.386	-41.3368	0	0.835229	0
RNF41	NP_005776.1	E3 ubiquitin-protein ligase NRDP1 isoform 1 [Homo sapiens]	2.194e-05	0	0	0	1.503e-05	0	-7.974	-2.2318	0.476608	0.933761	0.181713	0.787	0.1464	1	0.805169	0.855776
ZNF385A	NP_001124439.1	1 genes:ZNF385A.NP_001124439.1:zinc finger protein 385A isoform a [Homo sapiens] ;NP_001124440.1:zinc finger protein 385A isoform b [Homo sapiens] ;NP_001276930.1:zinc finger protein 385A isoform d [Homo sapiens] ;NP_001276931.1:zinc finger protein 385A isoform c [Homo sapiens] ;	1.802e-05	0	0	0	0	1.207e-05	-7.974	-2.1161	0.53088	0.940034	0.207587	-0.556	-0.1433	1	0.867249	0.782821
RAB5B	NP_001238966.1	ras-related protein Rab-5B isoform 2 [Homo sapiens]	0	3.651e-05	0	0	2.19e-05	0	-7.959	-2.4652	0.376976	0.921473	0.138691	-0.862	-0.2151	1	0.881511	0.760697
ATXN1L	NP_001131147.1	ataxin-1-like [Homo sapiens]	1.009e-05	1.106e-05	0	7.04e-06	1.729e-05	1.691e-05	-7.955	-2.7766	0.266125	0.905098	0.092427	0.497	1.6246	0.894496	0.362159	0.992851
LMO7	NP_005349.3	LIM domain only protein 7 isoform 1 [Homo sapiens]	0.00026038	0.00013751	0	9.435e-05	8.299e-05	5.182e-05	-7.947	-1.8266	0.678562	0.953023	0.276166	-1.085	-2.5322	0.324903	0.91552	0.122349
FAM193A	NP_001243595.1	1 genes:FAM193A.NP_001243595.1:protein FAM193A isoform 2 [Homo sapiens] ;NP_001243596.1:protein FAM193A isoform 3 [Homo sapiens] ;NP_001243597.1:protein FAM193A isoform 4 [Homo sapiens] ;NP_001353245.1:protein FAM193A isoform 5 [Homo sapiens] ;NP_001353247.1:protein FAM193A isoform 6 [Homo sapiens] ;NP_003695.3:protein FAM193A isoform 1 [Homo sapiens] ;	0	4.02e-06	0	0	0	0	-7.942	-2.0209	0.577722	0.94468	0.2292	-6.893	-2.3661	0.390081	0.924134	0.148859
HAUS1	NP_612452.1	HAUS augmin-like complex subunit 1 [Homo sapiens]	2.502e-05	0	0	0	1.714e-05	1.676e-05	-7.94	-1.7086	0.742506	0.957006	0.305136	7.289	2.062	0.647283	0.242568	0.977209
GLTSCR1	NP_056526.3	BRD4-interacting chromatin-remodeling complex-associated protein [Homo sapiens]	8.92e-06	3.26e-06	0	3.11e-06	3.05e-06	2.99e-06	-7.932	-2.5048	0.361456	0.919294	0.131899	-0.599	-1.2062	1	0.964719	0.449195
NARFL	NP_001291728.1	1 genes:CIAO3.NP_001291728.1:cytosolic iron-sulfur assembly component 3 isoform 2 [Homo sapiens] ;NP_071938.1:cytosolic iron-sulfur assembly component 3 isoform 1 [Homo sapiens] ;	2.79e-05	0	0	0	0	0	-7.93	-2.5549	0.342413	0.917122	0.125312	-8.229	-2.3947	0.378314	0.922692	0.144184
C3orf38	NP_776185.2	uncharacterized protein C3orf38 [Homo sapiens]	2.114e-05	1.545e-05	1.577e-05	0	1.448e-05	1.416e-05	-7.925	-2.079	0.548911	0.941384	0.213658	-0.2	-0.6299	1	0.936395	0.635208
MVD	NP_002452.1	diphosphomevalonate decarboxylase [Homo sapiens]	1.739e-05	0	0	0	0	0	-7.923	-2.3464	0.425976	0.928014	0.160496	-7.066	-1.9365	0.592219	0.946919	0.240699
WDCP	NP_001135791.1	1 genes:WDCP.NP_001135791.1:WD repeat and coiled-coil-containing protein isoform 2 [Homo sapiens] ;NP_079479.1:WD repeat and coiled-coil-containing protein isoform 1 [Homo sapiens] ;	1.118e-05	0	0	0	0	1.498e-05	-7.923	-2.3191	0.437744	0.929461	0.165637	-0.641	-0.1255	1	0.864756	0.786426
DCAF13	NP_056235.5	DDB1- and CUL4-associated factor 13 [Homo sapiens]	7.034e-05	7.423e-05	2.331e-05	0	4.282e-05	2.618e-05	-7.916	-2.1299	0.524249	0.939352	0.204604	-0.762	-1.8797	0.622108	0.949368	0.253723
REEP3	NP_001001330.1	receptor expression-enhancing protein 3 [Homo sapiens]	2.728e-05	0	0	0	0	0	-7.906	-1.9366	0.620683	0.948435	0.248732	-7.501	-2.0783	0.520547	0.939708	0.206978
ASMTL	NP_001166944.1	1 genes:ASMTL.NP_001166944.1:probable bifunctional dTTP/UTP pyrophosphatase/methyltransferase protein isoform 2 [Homo sapiens] ;NP_001166945.1:probable bifunctional dTTP/UTP pyrophosphatase/methyltransferase protein isoform 3 [Homo sapiens] ;NP_004183.2:probable bifunctional dTTP/UTP pyrophosphatase/methyltransferase protein isoform 1 [Homo sapiens] ;	1.235e-05	0	0	0	0	0	-7.902	-2.2504	0.468173	0.93305	0.178955	-7.643	-2.4528	0.355104	0.919813	0.13514
KRI1	NP_075384.4	protein KRI1 homolog [Homo sapiens]	9.89e-06	0	0	0	1.694e-05	0	-7.896	-2.8063	0.256889	0.90373	0.089008	0.455	0.1255	1	0.811421	0.849725
SCAF1	NP_067051.2	splicing factor, arginine/serine-rich 19 [Homo sapiens]	0	7.75e-06	0	0	1.452e-05	7.1e-06	-7.896	-2.1681	0.506112	0.93728	0.195817	6.701	1.888	0.743396	0.286928	0.984958
RFK	NP_060809.3	riboflavin kinase [Homo sapiens]	4.487e-05	0	0	0	0	0	-7.892	-2.1453	0.516898	0.937972	0.198756	-7.431	-1.9627	0.578649	0.945656	0.23434
DLC1	NP_001303597.1	1 genes:DLC1.NP_001303597.1:rho GTPase-activating protein 7 isoform 5 [Homo sapiens] ;NP_001335010.1:rho GTPase-activating protein 7 isoform 1 [Homo sapiens] ;NP_001335011.1:rho GTPase-activating protein 7 isoform 4 [Homo sapiens] ;NP_006085.2:rho GTPase-activating protein 7 isoform 2 [Homo sapiens] ;	9.27e-06	0	0	0	4.23e-06	0	-7.885	-2.7778	0.265747	0.905098	0.092422	-2.659	-0.6994	1	0.942362	0.613756
ERAL1	NP_001304914.1	1 genes:ERAL1.NP_001304914.1:GTPase Era, mitochondrial isoform 2 [Homo sapiens] ;NP_001304915.1:GTPase Era, mitochondrial isoform 3 [Homo sapiens] ;NP_005693.1:GTPase Era, mitochondrial isoform 1 [Homo sapiens] ;	3.191e-05	1.748e-05	0	1.112e-05	3.278e-05	2.138e-05	-7.885	-2.7771	0.265968	0.905098	0.092425	0.069	0.1546	1	0.805169	0.855775
L2HGDH	NP_079160.1	L-2-hydroxyglutarate dehydrogenase, mitochondrial precursor [Homo sapiens]	1.502e-05	0	0	0	0	0	-7.881	-2.2345	0.475378	0.933761	0.181704	-7.995	-2.1611	0.480843	0.935561	0.189875
ZNF160	NP_001309058.1	zinc finger protein 160 isoform a [Homo sapiens]	0	1.592e-05	0	0	0	8.1e-07	-7.861	-2.4415	0.38646	0.922928	0.143344	-2.152	-0.5555	1	0.92821	0.660616
NAA16	NP_001104268.1	N-alpha-acetyltransferase 16, NatA auxiliary subunit isoform 3 [Homo sapiens]	1.621e-05	0	0	0	0	0	-7.86	-2.4649	0.377095	0.921473	0.138693	-8.467	-2.9134	0.204142	0.895892	0.072522
CENPT	NP_079358.3	centromere protein T [Homo sapiens]	1.86e-05	1.359e-05	0	1.296e-05	0	1.246e-05	-7.855	-2.1345	0.522047	0.938663	0.201671	-6.917	-2.0099	0.554568	0.943059	0.221939
TRA2B	NP_004584.1	transformer-2 protein homolog beta isoform 1 [Homo sapiens]	8.453e-05	9.706e-05	0	5.05e-05	0	3.236e-05	-7.85	-2.5087	0.35995	0.919294	0.131885	-7.929	-2.2843	0.424964	0.929173	0.165974
ZNF189	NP_001265160.1	zinc finger protein 189 isoform 3 [Homo sapiens]	0	2.491e-05	0	0	2.59e-06	0	-7.846	-2.011	0.582698	0.944677	0.229224	-2.955	-0.7941	1	0.949441	0.583444
MGAT2	NP_002399.1	alpha-1,6-mannosyl-glycoprotein 2-beta-N-acetylglucosaminyltransferase [Homo sapiens]	6.224e-05	1.137e-05	0	3.254e-05	0	0	-7.843	-2.1041	0.53668	0.940032	0.207626	-16.741	-11.8824	0	0.83868	0
CHTOP	NP_001193541.1	1 genes:CHTOP.NP_001193541.1:chromatin target of PRMT1 protein isoform 2 [Homo sapiens] ;NP_001231593.1:chromatin target of PRMT1 protein isoform 3 [Homo sapiens] ;NP_001304006.1:chromatin target of PRMT1 protein isoform 4 [Homo sapiens] ;NP_056422.2:chromatin target of PRMT1 protein isoform 1 [Homo sapiens] ;	0	3.062e-05	0	0	0	0	-7.839	-2.1779	0.501512	0.936581	0.192951	-6.511	-1.6401	0.754078	0.958739	0.316962
AURKA	NP_940835.1	aurora kinase A [Homo sapiens]	0	1.261e-05	0	0	1.182e-05	1.156e-05	-7.838	-2.2129	0.485264	0.935179	0.187262	7.333	2.269	0.539875	0.193563	0.965877
B3GAT3	NP_001275650.1	1 genes:B3GAT3.NP_001275650.1:galactosylgalactosylxylosylprotein 3-beta-glucuronosyltransferase 3 isoform 2 [Homo sapiens] ;NP_001275651.1:galactosylgalactosylxylosylprotein 3-beta-glucuronosyltransferase 3 isoform 3 [Homo sapiens] ;NP_001275652.1:galactosylgalactosylxylosylprotein 3-beta-glucuronosyltransferase 3 isoform 4 [Homo sapiens] ;NP_036332.2:galactosylgalactosylxylosylprotein 3-beta-glu…	9.542e-05	2.324e-05	0	2.217e-05	1.452e-05	7.814e-05	-7.816	-1.7835	0.701723	0.954595	0.286852	-0.281	-0.2984	1	0.894594	0.73774
CLIC6	NP_001303938.1	chloride intracellular channel protein 6 isoform 1 [Homo sapiens]	6.14e-06	0	0	0	0	0	-7.813	-2.0828	0.547051	0.941384	0.213643	-7.16	-1.9657	0.577105	0.945657	0.234337
SNAI1	NP_005976.2	2 genes:SNAI1,SNAI3.NP_005976.2:zinc finger protein SNAI1 [Homo sapiens] ;NP_840101.1:zinc finger protein SNAI3 [Homo sapiens] ;	5.269e-05	0	0	0	0	0	-7.807	-1.9898	0.593417	0.945956	0.235612	-8.464	-2.3582	0.39337	0.924855	0.151212
POM121C	NP_001092885.2	nuclear envelope pore membrane protein POM 121C [Homo sapiens]	1.057e-05	0	0	0	0	7.08e-06	-7.798	-2.6962	0.292287	0.909269	0.103223	-0.704	-0.2379	1	0.883778	0.756918
NFKBIB	NP_001230045.1	1 genes:NFKBIB.NP_001230045.1:NF-kappa-B inhibitor beta isoform 2 [Homo sapiens] ;NP_001356628.1:NF-kappa-B inhibitor beta isoform 3 [Homo sapiens] ;NP_002494.2:NF-kappa-B inhibitor beta isoform 1 [Homo sapiens] ;	7.728e-05	0	0	0	0	1.726e-05	-7.784	-1.9869	0.59489	0.945955	0.23562	-1.417	-0.3949	1	0.908357	0.710032
ME1	NP_002386.1	NADP-dependent malic enzyme [Homo sapiens]	7.296e-05	8.89e-06	5.894e-05	0	0	2.852e-05	-7.782	-2.0134	0.58149	0.944677	0.229215	-6.989	-2.0331	0.54291	0.941731	0.215898
HIF1AN	NP_060372.2	hypoxia-inducible factor 1-alpha inhibitor [Homo sapiens]	7.972e-05	1.456e-05	0	1.389e-05	0	0	-7.78	-2.3406	0.428461	0.928014	0.160514	-17.212	-23.0877	0	0.837875	0
NFIA	NP_001128145.1	nuclear factor 1 A-type isoform 1 [Homo sapiens]	1.366e-05	0	0	0	0	5.41e-06	-7.778	-2.4036	0.401931	0.925111	0.150532	-1.301	-0.3553	1	0.902657	0.722019
SMG6	NP_060045.4	telomerase-binding protein EST1A isoform 1 [Homo sapiens]	1.225e-05	1.612e-05	3.66e-06	0	3.36e-06	4.93e-06	-7.777	-2.5893	0.329721	0.914959	0.118992	-1.214	-3.4624	0.093631	0.873499	0.030403
MON1B	NP_055755.1	vacuolar fusion protein MON1 homolog B isoform 1 [Homo sapiens]	5.086e-05	1.394e-05	1.896e-05	0	1.306e-05	2.13e-05	-7.769	-2.2041	0.489322	0.935177	0.187282	-0.485	-0.7333	1	0.945571	0.600815
HGH1	NP_057542.2	protein HGH1 homolog [Homo sapiens]	0	1.303e-05	0	0	0	2.987e-05	-7.761	-2.4204	0.395028	0.923655	0.145742	0.123	0.0328	1	0.832369	0.827598
EML2	NP_001180197.1	1 genes:EML2.NP_001180197.1:echinoderm microtubule-associated protein-like 2 isoform 1 [Homo sapiens] ;NP_001180198.1:echinoderm microtubule-associated protein-like 2 isoform 3 [Homo sapiens] ;NP_001338981.1:echinoderm microtubule-associated protein-like 2 isoform 5 [Homo sapiens] ;NP_001338982.1:echinoderm microtubule-associated protein-like 2 isoform 6 [Homo sapiens] ;NP_001338983.1:echinoderm …	1.637e-05	0	0	0	0	0	-7.761	-2.171	0.504748	0.937281	0.195814	-7.213	-1.9756	0.57202	0.945015	0.231198
SRSF6	NP_006266.2	serine/arginine-rich splicing factor 6 [Homo sapiens]	2.022e-05	1.477e-05	1.256e-05	0	2.77e-05	1.355e-05	-7.759	-2.2583	0.464616	0.932335	0.176256	0.098	0.2276	1	0.785731	0.873176
KNTC1	NP_055523.1	kinetochore-associated protein 1 [Homo sapiens]	1.732e-05	9.2e-06	4.7e-06	0	5.39e-06	5.27e-06	-7.748	-2.4949	0.365297	0.92002	0.134126	-0.818	-2.0279	0.545512	0.942399	0.218882
NSRP1	NP_001248396.1	1 genes:NSRP1.NP_001248396.1:nuclear speckle splicing regulatory protein 1 isoform 2 [Homo sapiens] ;NP_115517.1:nuclear speckle splicing regulatory protein 1 isoform 1 [Homo sapiens] ;	0	1.008e-05	0	0	9.45e-06	1.387e-05	-7.748	-2.421	0.394783	0.923655	0.145739	6.461	1.6531	0.878019	0.354308	0.992333
CNTNAP3	NP_387504.2	contactin-associated protein-like 3 precursor [Homo sapiens]	1.08e-05	0	0	0	0	0	-7.745	-2.0836	0.54666	0.941384	0.21364	-7.023	-1.9186	0.60157	0.94754	0.243928
AMPD2	NP_001244290.1	1 genes:AMPD2.NP_001244290.1:AMP deaminase 2 isoform 4 [Homo sapiens] ;NP_001295099.1:AMP deaminase 2 isoform 5 [Homo sapiens] ;NP_001355738.1:AMP deaminase 2 isoform 1 [Homo sapiens] ;NP_631895.1:AMP deaminase 2 isoform 2 [Homo sapiens] ;	9.14e-06	0	0	0	0	0	-7.745	-1.6929	0.751128	0.957455	0.308866	-6.738	-2.05	0.534493	0.941061	0.212889
PDHX	NP_001128496.1	1 genes:PDHX.NP_001128496.1:pyruvate dehydrogenase protein X component, mitochondrial isoform 2 [Homo sapiens] ;NP_003468.2:pyruvate dehydrogenase protein X component, mitochondrial isoform 1 precursor [Homo sapiens] ;	1.431e-05	0	0	0	0	2.877e-05	-7.742	-2.5329	0.350694	0.917844	0.127493	-0.392	-0.0895	1	0.857089	0.797081
SPR	NP_003115.1	sepiapterin reductase [Homo sapiens]	2.665e-05	1.947e-05	1.987e-05	0	2.738e-05	1.786e-05	-7.726	-2.1947	0.493677	0.935881	0.190092	-0.042	-0.0901	1	0.857089	0.79708
SAP18	NP_005861.2	histone deacetylase complex subunit SAP18 isoform 1 [Homo sapiens]	6.066e-05	4.432e-05	0	5.638e-05	0	5.419e-05	-7.724	-2.3038	0.44442	0.930182	0.16825	-7.689	-2.1469	0.487533	0.93626	0.192661
IREB2	NP_001307871.2	1 genes:IREB2.NP_001307871.2:iron-responsive element-binding protein 2 isoform 3 [Homo sapiens] ;NP_001341923.1:iron-responsive element-binding protein 2 isoform 3 [Homo sapiens] ;NP_004127.2:iron-responsive element-binding protein 2 isoform 1 [Homo sapiens] ;	7.68e-06	0	0	0	0	0	-7.724	-1.7634	0.712605	0.955096	0.290482	-8.055	-2.4664	0.349807	0.919095	0.132946
STRIP1	NP_149079.2	striatin-interacting protein 1 isoform 1 [Homo sapiens]	2.908e-05	1.214e-05	1.549e-05	0	1.708e-05	2.227e-05	-7.72	-2.1184	0.529772	0.939349	0.20464	-0.006	-0.0104	1	0.840891	0.817675
GTPBP8	NP_054889.2	1 genes:GTPBP8.NP_054889.2:GTP-binding protein 8 isoform 1 [Homo sapiens] ;NP_612494.1:GTP-binding protein 8 isoform 2 [Homo sapiens] ;	2.449e-05	1.79e-05	0	1.707e-05	0	1.641e-05	-7.717	-1.9276	0.625345	0.948432	0.248761	-8.769	-1.9175	0.602147	0.94754	0.243932
MRPL28	NP_006419.2	39S ribosomal protein L28, mitochondrial [Homo sapiens]	5.434e-05	9.926e-05	0	7.576e-05	0.00020471	0.00011833	-7.713	-2.2343	0.475469	0.933761	0.181704	0.745	1.5148	0.957802	0.394192	0.994196
MRPS11	NP_001308902.1	28S ribosomal protein S11, mitochondrial isoform e [Homo sapiens]	0	4.498e-05	0	0	0	0	-7.712	-2.338	0.429578	0.928014	0.160526	-8.673	-2.2163	0.45532	0.932741	0.178992
RBM4B	NP_113680.1	RNA-binding protein 4B isoform 1 [Homo sapiens]	0	2.831e-05	0	0	2.986e-05	8.65e-06	-7.71	-2.0606	0.557961	0.942719	0.219781	6.907	2.1616	0.594515	0.217246	0.971736
GFPT2	NP_005101.1	glutamine--fructose-6-phosphate aminotransferase [isomerizing] 2 [Homo sapiens]	1.084e-05	0	0	0	0	0	-7.708	-2.383	0.410494	0.925837	0.152998	-7.236	-1.9646	0.577671	0.945656	0.234337
POT1	NP_001036059.1	1 genes:POT1.NP_001036059.1:protection of telomeres protein 1 isoform 4 [Homo sapiens] ;NP_056265.2:protection of telomeres protein 1 isoform 1 [Homo sapiens] ;	1.383e-05	0	0	0	0	0	-7.704	-2.6299	0.315147	0.912811	0.112889	-8.51	-2.5912	0.303601	0.911982	0.112387
ZNF587	NP_001191746.1	2 genes:ZNF417,ZNF587.NP_001191746.1:zinc finger protein 587 isoform 2 [Homo sapiens] ;NP_001284663.1:zinc finger protein 417 isoform 2 [Homo sapiens] ;NP_116217.1:zinc finger protein 587 isoform 1 [Homo sapiens] ;NP_689688.2:zinc finger protein 417 isoform 1 [Homo sapiens] ;	3.029e-05	0	0	0	0	0	-7.692	-2.1403	0.519279	0.938664	0.201652	-8.322	-2.7706	0.244755	0.903049	0.089182
ZCCHC3	NP_149080.2	zinc finger CCHC domain-containing protein 3 [Homo sapiens]	5.178e-05	0	0	0	0	0	-7.686	-2.0117	0.582345	0.944677	0.229221	-9.082	-2.7654	0.246337	0.90305	0.089194
FRMD4A	NP_001305265.1	1 genes:FRMD4A.NP_001305265.1:FERM domain-containing protein 4A isoform b [Homo sapiens] ;NP_001305266.1:FERM domain-containing protein 4A isoform c [Homo sapiens] ;NP_060497.3:FERM domain-containing protein 4A isoform a [Homo sapiens] ;	0	7.23e-06	0	0	9.03e-06	0	-7.683	-2.0027	0.586885	0.94532	0.232397	-0.828	-0.2382	1	0.883778	0.756917
TRIM3	NP_001234936.1	1 genes:TRIM3.NP_001234936.1:tripartite motif-containing protein 3 isoform 2 [Homo sapiens] ;NP_150594.2:tripartite motif-containing protein 3 isoform 1 [Homo sapiens] ;	1.669e-05	0	0	0	0	1.118e-05	-7.682	-2.4352	0.389007	0.922928	0.143366	-0.98	-0.2213	1	0.881513	0.76069
FAM134A	NP_077269.3	reticulophagy regulator 2 isoform 1 [Homo sapiens]	0	1.404e-05	0	0	8.77e-06	0	-7.681	-2.578	0.333856	0.915679	0.121071	0.079	0.0161	1	0.835241	0.824319
YTHDF1	NP_060268.2	YTH domain-containing family protein 1 [Homo sapiens]	1.555e-05	0	0	0	0	0	-7.68	-2.3524	0.423415	0.927289	0.157992	-7.861	-2.2723	0.430232	0.929171	0.166006
PIP4K2B	NP_003550.1	phosphatidylinositol 5-phosphate 4-kinase type-2 beta [Homo sapiens]	1.858e-05	7.64e-06	1.801e-05	0	0	7.84e-06	-7.665	-2.4443	0.385332	0.922928	0.14334	-7.268	-2.187	0.468771	0.934155	0.184384
NUB1	NP_001230280.1	1 genes:NUB1.NP_001230280.1:NEDD8 ultimate buster 1 isoform 1 [Homo sapiens] ;NP_001350458.1:NEDD8 ultimate buster 1 isoform 3 [Homo sapiens] ;NP_057202.3:NEDD8 ultimate buster 1 isoform 2 [Homo sapiens] ;	1.633e-05	0	0	0	1.118e-05	7.29e-06	-7.665	-2.2334	0.475879	0.933761	0.181707	4.691	1.1522	1	0.507465	0.98849
HIST1H2AC	NP_003503.1	histone H2A type 1-C [Homo sapiens]	2.675e-05	0	0	0	0	0	-7.664	-2.6083	0.322847	0.914242	0.11692	-8.024	-2.6321	0.289403	0.909883	0.106682
RYBP	NP_036366.3	RING1 and YY1-binding protein [Homo sapiens]	0	2.229e-05	0	0	0	2.044e-05	-7.661	-2.2799	0.454966	0.93162	0.173545	-0.983	-0.2857	1	0.892496	0.741619
ZNF131	NP_001317633.1	1 genes:ZNF131.NP_001317633.1:zinc finger protein 131 isoform 3 [Homo sapiens] ;NP_001317636.1:zinc finger protein 131 isoform 1 [Homo sapiens] ;NP_001317644.1:zinc finger protein 131 isoform 2 [Homo sapiens] ;NP_001317645.1:zinc finger protein 131 isoform 4 [Homo sapiens] ;NP_001317646.1:zinc finger protein 131 isoform 5 [Homo sapiens] ;	4.044e-05	0	0	0	2.077e-05	0	-7.641	-2.3683	0.416672	0.926563	0.155479	-0.889	-0.1958	1	0.876889	0.768162
SP2	NP_003101.3	transcription factor Sp2 [Homo sapiens]	3.404e-05	8.29e-06	8.46e-06	0	0	7.6e-06	-7.638	-2.0979	0.539689	0.940711	0.210603	-7.188	-2.466	0.349962	0.919095	0.132946
CYRIB	NP_001340172.1	1 genes:CYRIB.NP_001340172.1:protein FAM49B isoform 1 [Homo sapiens] ;NP_001340232.1:protein FAM49B isoform 3 [Homo sapiens] ;NP_001340245.1:protein FAM49B isoform 4 [Homo sapiens] ;	2.147e-05	0	0	0	1.47e-05	2.158e-05	-7.635	-2.6806	0.297562	0.909973	0.105116	7.812	2.665	0.362791	0.119436	0.942366
HS2ST1	NP_001127964.1	1 genes:HS2ST1.NP_001127964.1:heparan sulfate 2-O-sulfotransferase 1 isoform 2 [Homo sapiens] ;NP_036394.1:heparan sulfate 2-O-sulfotransferase 1 isoform 1 [Homo sapiens] ;	4.556e-05	0	0	0	0	0	-7.633	-2.1516	0.513906	0.937973	0.198728	-8.308	-2.495	0.338834	0.917661	0.12863
ZMIZ2	NP_001287888.1	zinc finger MIZ domain-containing protein 2 isoform 3 [Homo sapiens]	2.017e-05	0	0	0	1.382e-05	1.442e-05	-7.623	-2.5954	0.327504	0.914959	0.118979	6.187	1.7019	0.849824	0.338793	0.991106
RFXANK	NP_001357164.1	1 genes:RFXANK.NP_001357164.1:DNA-binding protein RFXANK isoform d [Homo sapiens] ;NP_001357166.1:DNA-binding protein RFXANK isoform e [Homo sapiens] ;NP_001357167.1:DNA-binding protein RFXANK isoform f [Homo sapiens] ;NP_003712.1:DNA-binding protein RFXANK isoform a [Homo sapiens] ;	2.685e-05	0	0	0	0	0	-7.623	-2.2809	0.454522	0.931621	0.173544	-9.495	-2.9032	0.206865	0.896525	0.073925
BBX	NP_001136040.1	HMG box transcription factor BBX isoform 1 [Homo sapiens]	1.478e-05	1.08e-05	0	1.03e-05	2.53e-06	4.95e-06	-7.618	-2.2701	0.45933	0.931619	0.173574	-1.264	-2.9863	0.185451	0.892784	0.065772
ZNF580	NP_996998.1	zinc finger protein 580 [Homo sapiens]	8.088e-05	8.864e-05	0	2.819e-05	4.155e-05	0	-7.615	-2.1621	0.508939	0.937279	0.195836	-7.342	-1.8318	0.647781	0.951706	0.267118
SUGP1	NP_757386.2	SURP and G-patch domain-containing protein 1 [Homo sapiens]	2.157e-05	2.364e-05	0	3.383e-05	5.17e-05	2.529e-05	-7.609	-2.529	0.352176	0.918569	0.129662	0.46	1.084	1	0.533178	0.984685
PPP6C	NP_001116827.1	1 genes:PPP6C.NP_001116827.1:serine/threonine-protein phosphatase 6 catalytic subunit isoform a [Homo sapiens] ;NP_001116841.1:serine/threonine-protein phosphatase 6 catalytic subunit isoform c [Homo sapiens] ;NP_002712.1:serine/threonine-protein phosphatase 6 catalytic subunit isoform b [Homo sapiens] ;	4.067e-05	1.486e-05	0	1.418e-05	4.179e-05	2.725e-05	-7.609	-1.8306	0.676425	0.952476	0.272686	0.341	0.5624	1	0.694986	0.932947
NGDN	NP_001036100.1	1 genes:NGDN.NP_001036100.1:neuroguidin isoform 1 [Homo sapiens] ;NP_056329.1:neuroguidin isoform 2 [Homo sapiens] ;	2.208e-05	2.42e-05	0	3.848e-05	0	1.479e-05	-7.606	-2.2626	0.462685	0.932336	0.176241	-7.633	-1.967	0.576436	0.945013	0.231231
RLF	NP_036553.2	zinc finger protein Rlf [Homo sapiens]	5.45e-06	0	0	0	0	0	-7.603	-2.0822	0.547344	0.941384	0.213645	-8.157	-2.1175	0.501542	0.937649	0.198317
UPF3B	NP_075386.1	1 genes:UPF3B.NP_075386.1:regulator of nonsense transcripts 3B isoform 2 [Homo sapiens] ;NP_542199.1:regulator of nonsense transcripts 3B isoform 1 [Homo sapiens] ;	2.96e-05	0	0	0	0	0	-7.601	-2.2535	0.466776	0.933051	0.178951	-8.143	-2.2832	0.425445	0.929172	0.165974
ZNF622	NP_219482.1	zinc finger protein 622 [Homo sapiens]	1.458e-05	1.598e-05	2.718e-05	0	0	0	-7.598	-2.3384	0.429406	0.928014	0.160524	-16.514	-48.4619	0	0.833891	0
PRDM10	NP_001354820.1	1 genes:PRDM10.NP_001354820.1:PR domain zinc finger protein 10 isoform 7 [Homo sapiens] ;NP_001354821.1:PR domain zinc finger protein 10 isoform 6 [Homo sapiens] ;NP_001354822.1:PR domain zinc finger protein 10 isoform 5 [Homo sapiens] ;NP_001354824.1:PR domain zinc finger protein 10 isoform 14 [Homo sapiens] ;NP_001354825.1:PR domain zinc finger protein 10 isoform 13 [Homo sapiens] ;NP_001354826…	9.18e-06	0	0	0	0	0	-7.595	-2.2076	0.487705	0.935177	0.18727	-8.237	-2.6524	0.282528	0.909188	0.104811
SHPRH	NP_001036148.2	1 genes:SHPRH.NP_001036148.2:E3 ubiquitin-protein ligase SHPRH isoform a [Homo sapiens] ;NP_775105.1:E3 ubiquitin-protein ligase SHPRH isoform b [Homo sapiens] ;	6.2e-06	1.208e-05	0	8.64e-06	5.66e-06	6.92e-06	-7.594	-1.8971	0.641246	0.950218	0.258835	-0.342	-0.7466	1	0.946581	0.596485
VGLL4	NP_001121691.1	1 genes:VGLL4.NP_001121691.1:transcription cofactor vestigial-like protein 4 isoform a [Homo sapiens] ;NP_001121692.1:transcription cofactor vestigial-like protein 4 isoform c [Homo sapiens] ;NP_001121693.1:transcription cofactor vestigial-like protein 4 isoform d [Homo sapiens] ;NP_001271319.1:transcription cofactor vestigial-like protein 4 isoform e [Homo sapiens] ;NP_001271320.1:transcription …	2.35e-05	0	0	0	0	0	-7.59	-2.2347	0.475287	0.933761	0.181703	-7.424	-2.3422	0.400085	0.925576	0.153618
DTNB	NP_001243232.1	dystrobrevin beta isoform 6 [Homo sapiens]	5.61e-06	0	0	0	1.153e-05	0	-7.58	-2.1344	0.522095	0.938663	0.201671	0.291	0.0888	1	0.820578	0.840421
DVL3	NP_004414.3	segment polarity protein dishevelled homolog DVL-3 [Homo sapiens]	9.71e-06	1.065e-05	0	1.354e-05	9.98e-06	9.76e-06	-7.58	-2.0842	0.546366	0.941385	0.213639	-0.034	-0.1298	1	0.864757	0.786424
WDR45B	NP_062559.2	WD repeat domain phosphoinositide-interacting protein 3 [Homo sapiens]	4.044e-05	0	0	0	0	0	-7.565	-1.7971	0.694388	0.95408	0.283268	-8.676	-2.3347	0.403257	0.926297	0.156027
RIC8A	NP_001273063.1	1 genes:RIC8A.NP_001273063.1:synembryn-A isoform 2 [Homo sapiens] ;NP_068751.4:synembryn-A isoform 1 [Homo sapiens] ;	9.824e-05	3.35e-05	1.954e-05	0	2.692e-05	4.388e-05	-7.561	-2.1303	0.524057	0.939352	0.204603	-0.529	-0.9009	1	0.955788	0.548588
MECOM	NP_001098547.3	1 genes:MECOM.NP_001098547.3:histone-lysine N-methyltransferase MECOM isoform a [Homo sapiens] ;NP_001353395.1:histone-lysine N-methyltransferase MECOM isoform f [Homo sapiens] ;NP_001353396.1:histone-lysine N-methyltransferase MECOM isoform g [Homo sapiens] ;NP_001353398.1:histone-lysine N-methyltransferase MECOM isoform b [Homo sapiens] ;NP_001353399.1:histone-lysine N-methyltransferase MECOM i…	6.23e-06	4.55e-06	0	4.34e-06	0	4.18e-06	-7.56	-2.2604	0.463672	0.932335	0.176248	-7.301	-1.9759	0.571867	0.945015	0.231197
SLMAP	NP_001291349.1	1 genes:SLMAP.NP_001291349.1:sarcolemmal membrane-associated protein isoform a [Homo sapiens] ;NP_001291350.1:sarcolemmal membrane-associated protein isoform c [Homo sapiens] ;NP_009090.2:sarcolemmal membrane-associated protein isoform b [Homo sapiens] ;	8.4e-06	0	0	0	5.75e-06	5.63e-06	-7.552	-2.3638	0.418574	0.92729	0.157962	5.281	1.3662	1	0.439602	0.993942
CLGN	NP_004353.1	calmegin precursor [Homo sapiens]	1.14e-05	8.33e-06	0	7.95e-06	7.81e-06	7.64e-06	-7.546	-2.4754	0.37294	0.920746	0.136414	-0.231	-0.6817	1	0.941227	0.618071
RNASET2	NP_003721.2	ribonuclease T2 precursor [Homo sapiens]	0	1.985e-05	0	0	0	0	-7.546	-2.1532	0.513147	0.937973	0.198723	-8.261	-2.3996	0.37632	0.922692	0.14417
CEP170	NP_001035863.1	centrosomal protein of 170 kDa isoform beta [Homo sapiens]	1.287e-05	0	0	0	6.14e-06	1.165e-05	-7.545	-2.2369	0.474287	0.933762	0.181698	6.792	2.0192	0.670505	0.252447	0.979139
PVR	NP_001129240.1	1 genes:PVR.NP_001129240.1:poliovirus receptor isoform beta precursor [Homo sapiens] ;NP_001129241.1:poliovirus receptor isoform gamma precursor [Homo sapiens] ;NP_001129242.2:poliovirus receptor isoform delta precursor [Homo sapiens] ;NP_006496.4:poliovirus receptor isoform alpha precursor [Homo sapiens] ;	1.87e-05	5.465e-05	0	1.955e-05	1.921e-05	2.506e-05	-7.542	-2.2114	0.485954	0.935178	0.187263	-0.341	-0.5953	1	0.932447	0.647956
HNRNPCL1	NP_001013653.1	heterogeneous nuclear ribonucleoprotein C-like 1 [Homo sapiens]	7.913e-05	0	0	0	0	0	-7.542	-2.1983	0.492007	0.935882	0.190086	-7.823	-2.2738	0.429571	0.929171	0.165999
DNASE2	NP_001366.1	deoxyribonuclease-2-alpha precursor [Homo sapiens]	1.932e-05	0	0	0	0	0	-7.542	-1.9128	0.633042	0.949033	0.25211	-6.614	-1.9605	0.579783	0.945655	0.234344
DDAH2	NP_001289936.1	N(G),N(G)-dimethylarginine dimethylaminohydrolase 2 [Homo sapiens]	2.44e-05	0	0	0	3.343e-05	0	-7.532	-2.0515	0.562463	0.942716	0.219808	0.377	0.0848	1	0.820578	0.840421
SHB	NP_003019.2	SH2 domain-containing adapter protein B [Homo sapiens]	0	1.498e-05	0	0	0	0	-7.528	-2.3909	0.407198	0.925838	0.152982	-6.869	-1.9851	0.567161	0.944367	0.228091
ARMC8	NP_001253971.1	armadillo repeat-containing protein 8 isoform 4 [Homo sapiens]	7.83e-06	0	0	0	0	0	-7.527	-2.3002	0.446	0.930181	0.168262	-7.032	-2.0352	0.54186	0.941731	0.215887
FRYL	NP_055845.1	protein furry homolog-like [Homo sapiens]	6.93e-06	0	0	0	1.58e-06	2.32e-06	-7.526	-2.2382	0.473697	0.933762	0.181696	4.527	1.1387	1	0.511743	0.987927
ZFP90	NP_597715.2	zinc finger protein 90 homolog isoform 1 [Homo sapiens]	1.094e-05	4.88e-06	1.223e-05	0	1.124e-05	1.05e-06	-7.518	-2.1281	0.525111	0.939351	0.204605	-0.675	-0.6497	1	0.937656	0.630925
PKNOX1	NP_001307623.1	1 genes:PKNOX1.NP_001307623.1:homeobox protein PKNOX1 isoform 3 [Homo sapiens] ;NP_004562.2:homeobox protein PKNOX1 isoform 1 [Homo sapiens] ;	3.198e-05	1.752e-05	1.192e-05	0	1.095e-05	2.143e-05	-7.514	-2.4059	0.400982	0.924383	0.148144	-0.489	-0.8728	1	0.954368	0.557314
ZNF346	NP_001295142.1	1 genes:ZNF346.NP_001295142.1:zinc finger protein 346 isoform b [Homo sapiens] ;NP_001295143.1:zinc finger protein 346 isoform c [Homo sapiens] ;NP_001350642.1:zinc finger protein 346 isoform i [Homo sapiens] ;NP_036411.1:zinc finger protein 346 isoform a [Homo sapiens] ;	0	2.39e-05	0	0	0	0	-7.513	-2.3739	0.414312	0.926564	0.155463	-7.501	-1.9659	0.577002	0.945657	0.234337
TBC1D20	NP_653229.1	TBC1 domain family member 20 [Homo sapiens]	2.589e-05	0	0	0	0	0	-7.509	-2.193	0.494467	0.935881	0.190096	-6.776	-1.9434	0.588632	0.946288	0.237525
PHF1	NP_077084.2	PHD finger protein 1 isoform b [Homo sapiens]	0	1.345e-05	0	0	1.68e-05	0	-7.506	-2.1426	0.518183	0.938665	0.201648	-0.73	-0.1829	1	0.874528	0.771862
CEP131	NP_001009811.2	1 genes:CEP131.NP_001009811.2:centrosomal protein of 131 kDa isoform b [Homo sapiens] ;NP_001306157.1:centrosomal protein of 131 kDa isoform c [Homo sapiens] ;NP_001306158.1:centrosomal protein of 131 kDa isoform d [Homo sapiens] ;NP_055799.2:centrosomal protein of 131 kDa isoform a [Homo sapiens] ;	9.99e-06	1.217e-05	0	4.64e-06	1.369e-05	1.562e-05	-7.505	-2.2505	0.468128	0.93305	0.178955	0.285	0.8471	1	0.605456	0.968153
IMPDH1	NP_000874.2	1 genes:IMPDH1.NP_000874.2:inosine-5'-monophosphate dehydrogenase 1 isoform a [Homo sapiens] ;NP_001096075.1:inosine-5'-monophosphate dehydrogenase 1 isoform c [Homo sapiens] ;NP_001136045.1:inosine-5'-monophosphate dehydrogenase 1 isoform e [Homo sapiens] ;NP_001136048.1:inosine-5'-monophosphate dehydrogenase 1 isoform d [Homo sapiens] ;NP_001291450.1:inosine-5'-monophosphate dehydrogenase 1 iso…	4.064e-05	2.121e-05	0	1.619e-05	7.95e-06	1.556e-05	-7.5	-1.781	0.703074	0.954593	0.286858	-0.964	-1.7311	0.70299	0.955465	0.291503
EPS15	NP_001153441.1	1 genes:EPS15.NP_001153441.1:epidermal growth factor receptor substrate 15 isoform B [Homo sapiens] ;NP_001972.1:epidermal growth factor receptor substrate 15 isoform A [Homo sapiens] ;	2.39e-05	8.73e-06	8.91e-06	0	0	0	-7.493	-1.8517	0.665191	0.951925	0.269166	-16.413	-29.2698	0	0.837061	0
ZNF407	NP_001139661.1	1 genes:ZNF407.NP_001139661.1:zinc finger protein 407 isoform 2 [Homo sapiens] ;NP_060227.2:zinc finger protein 407 isoform 1 [Homo sapiens] ;	3.83e-06	2.8e-06	0	2.67e-06	6.56e-06	0	-7.491	-2.0696	0.553526	0.942053	0.216703	-6.597	-1.9534	0.58345	0.945653	0.234375
TBC1D1	NP_001240841.1	TBC1 domain family member 1 isoform 2 [Homo sapiens]	5e-06	0	0	0	0	0	-7.49	-2.1406	0.519136	0.938664	0.201651	-6.487	-1.6857	0.728354	0.957406	0.305904
PDIA4	NP_001358173.1	protein disulfide-isomerase A4 isoform 1 precursor [Homo sapiens]	0.00011278	0.00010005	0	0.00014517	9.927e-05	9.423e-05	-7.489	-2.3326	0.431901	0.928738	0.163053	-0.073	-0.2299	1	0.883774	0.756924
RNF214	NP_001265178.1	RING finger protein 214 isoform 2 [Homo sapiens]	1.269e-05	2.782e-05	2.366e-05	0	2.173e-05	0	-7.482	-2.1155	0.531169	0.940034	0.207587	-7.405	-1.9876	0.565886	0.944368	0.228083
ADPRHL2	NP_060295.1	ADP-ribose glycohydrolase ARH3 [Homo sapiens]	1.916e-05	0	0	0	0	0	-7.475	-2.1856	0.497913	0.936583	0.192936	-7.703	-2.3052	0.415879	0.927735	0.160955
URGCP	NP_001071131.1	1 genes:URGCP.NP_001071131.1:up-regulator of cell proliferation isoform 3 [Homo sapiens] ;NP_001071132.1:up-regulator of cell proliferation isoform 2 [Homo sapiens] ;NP_060390.3:up-regulator of cell proliferation isoform 1 [Homo sapiens] ;	1.494e-05	0	0	0	0	0	-7.475	-2.1062	0.535663	0.940032	0.207615	-7.598	-1.9071	0.607612	0.948157	0.247164
ZNF93	NP_112495.2	zinc finger protein 93 [Homo sapiens]	1.683e-05	0	0	0	0	0	-7.459	-1.8639	0.658726	0.951363	0.265704	-8.524	-2.371	0.388048	0.924134	0.148841
ASH1L	NP_060959.2	histone-lysine N-methyltransferase ASH1L isoform 2 [Homo sapiens]	2.35e-06	0	0	0	0	0	-7.456	-1.9445	0.616602	0.947823	0.245428	-7.422	-2.0578	0.530631	0.941063	0.212871
NHLRC2	NP_940916.2	NHL repeat-containing protein 2 [Homo sapiens]	4.79e-05	2.1e-05	1.786e-05	0	3.937e-05	3.851e-05	-7.456	-1.9244	0.627006	0.949037	0.252074	0.217	0.4394	1	0.72929	0.913848
GLI2	NP_001361282.1	zinc finger protein GLI2 isoform 2 [Homo sapiens]	0	4.86e-06	0	0	0	0	-7.453	-2.0544	0.561026	0.942717	0.219796	-5.935	-1.7829	0.674395	0.953369	0.277448
KIF1C	NP_006603.2	kinesin-like protein KIF1C [Homo sapiens]	1.892e-05	2.027e-05	0	1.319e-05	0	1.056e-05	-7.447	-2.1343	0.522143	0.938663	0.201672	-8.593	-2.6934	0.268992	0.907117	0.099392
PBX3	NP_001317711.1	pre-B-cell leukemia transcription factor 3 isoform 3 [Homo sapiens]	0	7.24e-06	0	0	0	0	-7.431	-1.7834	0.701777	0.954594	0.286852	-6.768	-2.0338	0.54256	0.941731	0.215894
MITD1	NP_620153.1	MIT domain-containing protein 1 isoform 1 [Homo sapiens]	4.19e-05	2.041e-05	0	4.868e-05	0	8.422e-05	-7.424	-1.9253	0.626539	0.949038	0.252074	-6.173	-1.1745	1	0.964435	0.457713
DSTYK	NP_056190.1	1 genes:DSTYK.NP_056190.1:dual serine/threonine and tyrosine protein kinase isoform 1 [Homo sapiens] ;NP_955749.1:dual serine/threonine and tyrosine protein kinase isoform 2 [Homo sapiens] ;	1.497e-05	0	0	0	0	0	-7.414	-2.0082	0.584109	0.944676	0.229239	-7.507	-1.8004	0.664826	0.952823	0.273972
KCMF1	NP_064507.3	E3 ubiquitin-protein ligase KCMF1 [Homo sapiens]	5.477e-05	1.334e-05	1.361e-05	0	0	1.223e-05	-7.409	-2.4288	0.391603	0.923656	0.145713	-6.475	-1.8369	0.645028	0.95113	0.263753
SMARCC2	NP_003066.2	SWI/SNF complex subunit SMARCC2 isoform a [Homo sapiens]	4.44e-05	8.477e-05	0.00016164	0	9.615e-05	7.965e-05	-7.406	-2.5466	0.345522	0.917121	0.125331	0.373	0.9046	1	0.588596	0.972847
HDAC7	NP_001091886.1	1 genes:HDAC7.NP_001091886.1:histone deacetylase 7 isoform d [Homo sapiens] ;NP_001295019.1:histone deacetylase 7 isoform e [Homo sapiens] ;NP_001354975.1:histone deacetylase 7 isoform f [Homo sapiens] ;NP_056216.2:histone deacetylase 7 isoform a [Homo sapiens] ;	2.187e-05	0	0	0	7.49e-06	1.465e-05	-7.396	-1.4284	0.89853	0.963563	0.38739	6.173	1.6186	0.897963	0.362139	0.992854
NDUFV3	NP_066553.3	NADH dehydrogenase [ubiquinone] flavoprotein 3, mitochondrial isoform a precursor [Homo sapiens]	3.676e-05	1.612e-05	0	1.025e-05	4.532e-05	1.971e-05	-7.393	-2.2781	0.455765	0.93162	0.173547	0.148	0.2422	1	0.782395	0.875964
EDRF1	NP_001189367.1	1 genes:EDRF1.NP_001189367.1:erythroid differentiation-related factor 1 isoform 1 [Homo sapiens] ;NP_056423.2:erythroid differentiation-related factor 1 isoform 2 [Homo sapiens] ;	1.685e-05	1.232e-05	0	1.175e-05	0	7.53e-06	-7.389	-1.8428	0.669922	0.952481	0.27265	-7.291	-2.3324	0.404232	0.926296	0.156031
LPIN1	NP_001248356.1	1 genes:LPIN1.NP_001248356.1:phosphatidate phosphatase LPIN1 isoform 2 [Homo sapiens] ;NP_001248357.1:phosphatidate phosphatase LPIN1 isoform 3 [Homo sapiens] ;NP_001336128.1:phosphatidate phosphatase LPIN1 isoform 1 [Homo sapiens] ;NP_001336130.1:phosphatidate phosphatase LPIN1 isoform 5 [Homo sapiens] ;NP_001336131.1:phosphatidate phosphatase LPIN1 isoform 6 [Homo sapiens] ;NP_001336134.1:phosp…	3.493e-05	0	0	0	1.595e-05	1.04e-05	-7.386	-1.7804	0.703398	0.954593	0.28686	5.669	1.5068	0.962392	0.398274	0.994274
ZNF354B	NP_478137.1	zinc finger protein 354B [Homo sapiens]	0	4.15e-06	0	0	0	1.09e-06	-7.384	-2.4582	0.379762	0.922201	0.140995	0.43	0.1206	1	0.811421	0.849725
SHC3	NP_058544.3	SHC-transforming protein 3 [Homo sapiens]	1.756e-05	0	0	0	0	0	-7.382	-2.1708	0.504842	0.93728	0.195814	-8.917	-2.5107	0.332908	0.916232	0.124446
FRMD5	NP_001273419.1	1 genes:FRMD5.NP_001273419.1:FERM domain-containing protein 5 isoform 3 [Homo sapiens] ;NP_001309878.1:FERM domain-containing protein 5 isoform 6 [Homo sapiens] ;NP_001309879.1:FERM domain-containing protein 5 isoform 7 [Homo sapiens] ;NP_001309880.1:FERM domain-containing protein 5 isoform 8 [Homo sapiens] ;NP_116281.2:FERM domain-containing protein 5 isoform 2 [Homo sapiens] ;	0	1.228e-05	0	0	2.302e-05	1.126e-05	-7.382	-1.6346	0.783335	0.959521	0.327745	4.957	1.4116	1	0.427101	0.994269
TAF6L	NP_006464.1	TAF6-like RNA polymerase II p300/CBP-associated factor-associated factor 65 kDa subunit 6L [Homo sapiens]	1.118e-05	0	0	0	0	0	-7.374	-2.2613	0.463268	0.932335	0.176245	-6.841	-1.3273	0.933992	0.964959	0.411475
BRCA1	NP_009225.1	1 genes:BRCA1.NP_009225.1:breast cancer type 1 susceptibility protein isoform 1 [Homo sapiens] ;NP_009228.2:breast cancer type 1 susceptibility protein isoform 3 [Homo sapiens] ;NP_009231.2:breast cancer type 1 susceptibility protein isoform 2 [Homo sapiens] ;	7.47e-06	0	0	0	0	0	-7.372	-2.2716	0.45866	0.931619	0.173567	-7.777	-2.0338	0.54256	0.941731	0.215894
NID2	NP_031387.3	nidogen-2 precursor [Homo sapiens]	5.06e-06	7.39e-06	0	3.53e-06	5.2e-06	0	-7.353	-2.0068	0.584815	0.945322	0.232392	-6.945	-2.1702	0.476582	0.934859	0.187127
GCFC2	NP_001188263.1	1 genes:GCFC2.NP_001188263.1:GC-rich sequence DNA-binding factor 2 isoform 2 [Homo sapiens] ;NP_003194.3:GC-rich sequence DNA-binding factor 2 isoform 1 [Homo sapiens] ;	1.705e-05	0	0	0	0	0	-7.342	-2.6022	0.325043	0.914242	0.116934	-7.248	-2.0264	0.546264	0.942398	0.218886
TBC1D23	NP_001186127.1	1 genes:TBC1D23.NP_001186127.1:TBC1 domain family member 23 isoform 1 [Homo sapiens] ;NP_060779.2:TBC1 domain family member 23 isoform 2 [Homo sapiens] ;	2.985e-05	7.27e-06	0	6.94e-06	0	6.67e-06	-7.341	-1.8186	0.682842	0.953019	0.27619	-6.8	-1.9295	0.595869	0.946917	0.240721
RIC1	NP_001193486.1	1 genes:RIC1.NP_001193486.1:RAB6A-GEF complex partner protein 1 isoform c [Homo sapiens] ;NP_065880.2:RAB6A-GEF complex partner protein 1 isoform a [Homo sapiens] ;	7.53e-06	7.33e-06	0	7e-06	0	1.009e-05	-7.34	-2.5787	0.333599	0.915679	0.121069	-6.167	-1.8035	0.663136	0.952825	0.273965
C1RL	NP_001284569.1	1 genes:C1RL.NP_001284569.1:complement C1r subcomponent-like protein isoform 2 precursor [Homo sapiens] ;NP_057630.2:complement C1r subcomponent-like protein isoform 1 precursor [Homo sapiens] ;	1.563e-05	2.284e-05	1.166e-05	0	1.606e-05	2.094e-05	-7.336	-1.9253	0.626539	0.949038	0.252074	-0.053	-0.1306	1	0.864758	0.786424
SRR	NP_068766.1	serine racemase isoform a [Homo sapiens]	2.046e-05	0	0	0	0	0	-7.333	-1.9856	0.595551	0.945955	0.235624	-8.426	-2.8003	0.235863	0.901717	0.085954
GLI3	NP_000159.3	transcriptional activator GLI3 [Homo sapiens]	1.321e-05	0	0	0	0	0	-7.33	-2.0748	0.550971	0.942055	0.216693	-7.683	-2.4171	0.369256	0.921972	0.141871
RPAP3	NP_001139548.1	1 genes:RPAP3.NP_001139548.1:RNA polymerase II-associated protein 3 isoform 3 [Homo sapiens] ;NP_078880.2:RNA polymerase II-associated protein 3 isoform 1 [Homo sapiens] ;	1.375e-05	0	0	0	2.825e-05	0	-7.328	-2.0839	0.546513	0.941384	0.213639	0.727	0.1568	1	0.805169	0.855775
TRMT61B	NP_060380.3	tRNA (adenine(58)-N(1))-methyltransferase, mitochondrial precursor [Homo sapiens]	1.458e-05	1.598e-05	0	2.033e-05	0	1.465e-05	-7.318	-1.9601	0.608576	0.947208	0.242128	-7.45	-2.6438	0.285427	0.909188	0.104835
SLC30A1	NP_067017.2	zinc transporter 1 [Homo sapiens]	0	2.005e-05	0	0	0	9.19e-06	-7.316	-1.7953	0.695358	0.954079	0.283272	0.402	0.1187	1	0.811421	0.849725
HIP1	NP_001230127.1	huntingtin-interacting protein 1 isoform 2 [Homo sapiens]	1.104e-05	8.35e-06	0	5.28e-06	2.64e-06	5.05e-06	-7.313	-2.1901	0.495816	0.93588	0.190106	-0.946	-1.9604	0.579835	0.945655	0.234345
ELP2	NP_001229804.1	1 genes:ELP2.NP_001229804.1:elongator complex protein 2 isoform 1 [Homo sapiens] ;NP_001229805.1:elongator complex protein 2 isoform 3 [Homo sapiens] ;NP_001229806.1:elongator complex protein 2 isoform 4 [Homo sapiens] ;NP_001229807.1:elongator complex protein 2 isoform 5 [Homo sapiens] ;NP_001229808.1:elongator complex protein 2 isoform 6 [Homo sapiens] ;NP_001311394.1:elongator complex protein …	1.952e-05	0	0	0	8.02e-06	1.046e-05	-7.31	-2.2063	0.488305	0.935177	0.187274	7.413	2.482	0.439537	0.151139	0.95347
ZSWIM8	NP_001229416.1	1 genes:ZSWIM8.NP_001229416.1:zinc finger SWIM domain-containing protein 8 isoform 2 [Homo sapiens] ;NP_001354728.1:zinc finger SWIM domain-containing protein 8 isoform 4 [Homo sapiens] ;NP_055852.2:zinc finger SWIM domain-containing protein 8 isoform 1 [Homo sapiens] ;	5.68e-06	2.77e-06	0	2.64e-06	0	7.61e-06	-7.31	-2.1171	0.530398	0.940035	0.207586	-6.402	-2.0458	0.536579	0.941061	0.212911
ZNF317	NP_001177720.1	1 genes:ZNF317.NP_001177720.1:zinc finger protein 317 isoform 2 [Homo sapiens] ;NP_065984.3:zinc finger protein 317 isoform 1 [Homo sapiens] ;	0	1.354e-05	0	0	0	0	-7.307	-2.2908	0.450139	0.930902	0.170885	-6.979	-2.3579	0.393495	0.924855	0.151213
YAP1	NP_001269027.1	transcriptional coactivator YAP1 isoform 5 [Homo sapiens]	2.298e-05	1.399e-05	3.427e-05	0	5.25e-06	1.54e-05	-7.299	-1.9529	0.612275	0.947206	0.242161	-0.677	-1.292	0.954298	0.965038	0.419795
DTNBP1	NP_001258596.1	1 genes:DTNBP1.NP_001258596.1:dysbindin isoform C [Homo sapiens] ;NP_001258597.1:dysbindin isoform d [Homo sapiens] ;NP_001258598.1:dysbindin isoform e [Homo sapiens] ;NP_115498.2:dysbindin isoform a [Homo sapiens] ;NP_898861.1:dysbindin isoform b [Homo sapiens] ;	5.152e-05	0	0	0	0	0	-7.298	-1.866	0.657615	0.951364	0.265699	-7.596	-1.6304	0.759579	0.959164	0.320675
CLPB	NP_001245321.1	1 genes:CLPB.NP_001245321.1:caseinolytic peptidase B protein homolog isoform 2 [Homo sapiens] ;NP_001245322.1:caseinolytic peptidase B protein homolog isoform 3 [Homo sapiens] ;NP_001245323.1:caseinolytic peptidase B protein homolog isoform 4 [Homo sapiens] ;NP_110440.1:caseinolytic peptidase B protein homolog isoform 1 [Homo sapiens] ;	1.027e-05	1.126e-05	7.66e-06	0	1.759e-05	0	-7.294	-2.5557	0.342115	0.917122	0.125312	-5.745	-1.5137	0.826355	0.962389	0.355086
COL5A2	NP_000384.2	collagen alpha-2(V) chain preproprotein [Homo sapiens]	0	8.48e-06	0	0	4.77e-06	6.22e-06	-7.293	-1.9036	0.637845	0.949628	0.255457	4.213	1.0678	1	0.537457	0.983957
CEP192	NP_115518.3	centrosomal protein of 192 kDa [Homo sapiens]	6.85e-06	0	0	0	0	4.59e-06	-7.291	-2.2832	0.453502	0.930901	0.170914	-0.073	-0.0198	1	0.843669	0.814313
RFX2	NP_000626.2	DNA-binding protein RFX2 isoform a [Homo sapiens]	0	4.79e-06	0	0	6.59e-06	0	-7.289	-2.0859	0.545536	0.941385	0.213635	0.394	0.1181	1	0.811421	0.849725
GSTT2	NP_000845.2	2 genes:GSTT2,GSTT2B.NP_000845.2:glutathione S-transferase theta-2 isoform a [Homo sapiens] ;NP_001074312.1:glutathione S-transferase theta-2B isoform 1 [Homo sapiens] ;NP_001289599.1:glutathione S-transferase theta-2 isoform b [Homo sapiens] ;NP_001350733.1:glutathione S-transferase theta-2B isoform 2 [Homo sapiens] ;	8.552e-05	5.207e-05	6.377e-05	0	1.953e-05	9.55e-05	-7.284	-2.2358	0.474787	0.933761	0.1817	-0.393	-0.5032	1	0.922114	0.677322
CASC3	NP_031385.2	protein CASC3 [Homo sapiens]	3.463e-05	1.446e-05	2.213e-05	0	3.388e-05	2.652e-05	-7.28	-2.0186	0.578876	0.944679	0.229202	0.302	0.6177	1	0.679243	0.940552
ELL	NP_006523.1	RNA polymerase II elongation factor ELL [Homo sapiens]	2.24e-05	1.228e-05	0	7.81e-06	1.151e-05	1.126e-05	-7.275	-2.4281	0.391888	0.923656	0.145715	-0.337	-0.7257	1	0.944533	0.605125
FAM83H	NP_940890.4	protein FAM83H [Homo sapiens]	5.9e-06	0	0	0	0	0	-7.273	-2.4052	0.401271	0.925111	0.150531	-7.355	-2.5996	0.300647	0.911982	0.112364
DERL1	NP_001128143.1	1 genes:DERL1.NP_001128143.1:derlin-1 isoform b [Homo sapiens] ;NP_001317530.1:derlin-1 isoform c [Homo sapiens] ;NP_077271.1:derlin-1 isoform a [Homo sapiens] ;	4.517e-05	0	0	0	4.125e-05	0	-7.271	-1.8967	0.641456	0.950218	0.258835	-0.366	-0.0836	1	0.857087	0.797084
NAA35	NP_078911.3	N-alpha-acetyltransferase 35, NatC auxiliary subunit [Homo sapiens]	9.59e-06	1.752e-05	4.292e-05	0	1.643e-05	2.893e-05	-7.27	-2.2668	0.460805	0.932337	0.176234	0.542	1.0938	1	0.528893	0.985393
CCDC137	NP_954981.1	coiled-coil domain-containing protein 137 [Homo sapiens]	4.813e-05	0	0	0	0	0	-7.269	-2.0615	0.557517	0.942719	0.219781	-6.252	-1.5664	0.79608	0.961091	0.339596
MAP2K7	NP_001284484.1	1 genes:MAP2K7.NP_001284484.1:dual specificity mitogen-activated protein kinase kinase 7 isoform 1 [Homo sapiens] ;NP_001284485.1:dual specificity mitogen-activated protein kinase kinase 7 isoform 2 [Homo sapiens] ;NP_660186.1:dual specificity mitogen-activated protein kinase kinase 7 isoform 3 [Homo sapiens] ;	2.398e-05	0	0	0	0	0	-7.265	-1.8278	0.67792	0.953024	0.276165	-8.189	-2.3144	0.411917	0.927016	0.158494
RAB9A	NP_004242.1	ras-related protein Rab-9A [Homo sapiens]	3.46e-05	0	0	0	0	0	-7.252	-1.8408	0.670986	0.95248	0.272651	-7.082	-1.8479	0.639106	0.95055	0.260402
SMAD3	NP_001138575.1	mothers against decapentaplegic homolog 3 isoform 3 [Homo sapiens]	3.398e-05	2.334e-05	2.723e-05	0	1.563e-05	0	-7.248	-1.9426	0.617583	0.947823	0.245436	-7.412	-1.8772	0.623437	0.949367	0.253733
DCK	NP_000779.1	deoxycytidine kinase [Homo sapiens]	2.675e-05	3.909e-05	2.992e-05	0	6.413e-05	6.273e-05	-7.245	-2.1002	0.538572	0.940712	0.210598	0.658	2.0605	0.648091	0.242564	0.97721
PLEKHG2	NP_001338622.1	1 genes:PLEKHG2.NP_001338622.1:pleckstrin homology domain-containing family G member 2 isoform 2 [Homo sapiens] ;NP_001338623.1:pleckstrin homology domain-containing family G member 2 isoform 3 [Homo sapiens] ;NP_073746.2:pleckstrin homology domain-containing family G member 2 isoform 1 [Homo sapiens] ;	5.62e-06	0	0	0	0	0	-7.241	-2.5231	0.354423	0.918569	0.12967	-7.89	-2.4741	0.34683	0.918377	0.130791
RNGTT	NP_001273355.1	1 genes:RNGTT.NP_001273355.1:mRNA-capping enzyme isoform b [Homo sapiens] ;NP_003791.3:mRNA-capping enzyme isoform a [Homo sapiens] ;	4.241e-05	1.328e-05	0	3.379e-05	2.075e-05	2.842e-05	-7.236	-1.9713	0.602841	0.946584	0.238869	0.007	0.0118	1	0.835242	0.824318
MRPL42	NP_054769.1	39S ribosomal protein L42, mitochondrial precursor [Homo sapiens]	0.00012245	7.158e-05	0	6.829e-05	0	4.923e-05	-7.236	-1.5925	0.80674	0.9606	0.339342	-8.552	-2.8111	0.232687	0.901056	0.084377
LRRC42	NP_443172.1	leucine-rich repeat-containing protein 42 [Homo sapiens]	1.625e-05	0	0	0	0	0	-7.234	-1.6289	0.786498	0.959517	0.327759	-7.348	-2.0536	0.532709	0.941062	0.212877
ARL8A	NP_620150.1	ADP-ribosylation factor-like protein 8A isoform 1 [Homo sapiens]	3.739e-05	0.0001776	0.00018126	0	0.00011526	0	-7.231	-1.9777	0.599574	0.946586	0.238852	-7.675	-2.0509	0.534047	0.941061	0.212886
USP16	NP_001001992.1	1 genes:USP16.NP_001001992.1:ubiquitin carboxyl-terminal hydrolase 16 isoform b [Homo sapiens] ;NP_001027582.1:ubiquitin carboxyl-terminal hydrolase 16 isoform a [Homo sapiens] ;	2.538e-05	9.27e-06	0	1.475e-05	2.029e-05	1.984e-05	-7.225	-1.9824	0.597179	0.945954	0.235639	0.287	0.5285	1	0.70274	0.928943
ARPC5	NP_005708.1	actin-related protein 2/3 complex subunit 5 isoform 1 [Homo sapiens]	0.00016122	3.366e-05	8.587e-05	0	6.31e-05	0	-7.224	-1.9824	0.597179	0.945954	0.235639	-7.909	-2.0808	0.519324	0.939708	0.206972
RAB11FIP5	NP_056285.1	rab11 family-interacting protein 5 isoform 2 [Homo sapiens]	6.923e-05	4.475e-05	0	2.97e-05	2.554e-05	6.066e-05	-7.221	-2.0087	0.583857	0.944676	0.229237	-0.328	-0.5751	1	0.931062	0.6522
CDAN1	NP_612486.2	codanin-1 [Homo sapiens]	8.5e-06	0	0	0	0	0	-7.22	-2.3249	0.435229	0.928738	0.16308	-8.267	-2.1801	0.471971	0.934154	0.184409
BRWD1	NP_061836.2	bromodomain and WD repeat-containing protein 1 isoform A [Homo sapiens]	0	2.19e-06	0	0	2.33e-06	0	-7.214	-2.2277	0.478479	0.933761	0.181733	-1.488	-0.3933	1	0.908356	0.710034
TATDN2	NP_055575.3	putative deoxyribonuclease TATDN2 [Homo sapiens]	9.14e-06	0	0	0	0	0	-7.213	-1.7092	0.742177	0.957006	0.305133	-7.681	-1.9299	0.59566	0.946917	0.240719
EML3	NP_694997.2	echinoderm microtubule-associated protein-like 3 isoform 3 [Homo sapiens]	1.941e-05	1.134e-05	2.894e-05	0	2.127e-05	1.3e-05	-7.212	-2.3758	0.413513	0.926564	0.15546	0.105	0.2274	1	0.785731	0.873176
ZC3H11A	NP_001337190.1	1 genes:ZC3H11A.NP_001337190.1:zinc finger CCCH domain-containing protein 11A isoform 1 [Homo sapiens] ;NP_001337194.1:zinc finger CCCH domain-containing protein 11A isoform 2 [Homo sapiens] ;	8.59e-06	1.569e-05	0	5.99e-06	2.059e-05	5.75e-06	-7.207	-2.4482	0.383765	0.9222	0.141024	-0.067	-0.1078	1	0.85968	0.793553
PPP4R1	NP_001035847.1	1 genes:PPP4R1.NP_001035847.1:serine/threonine-protein phosphatase 4 regulatory subunit 1 isoform a [Homo sapiens] ;NP_005125.1:serine/threonine-protein phosphatase 4 regulatory subunit 1 isoform b [Homo sapiens] ;	7.32e-06	1.07e-05	1.638e-05	0	0	1.962e-05	-7.206	-2.2936	0.448904	0.930902	0.170881	-5.465	-1.4794	0.846134	0.962945	0.362961
SCO1	NP_004580.1	protein SCO1 homolog, mitochondrial [Homo sapiens]	4.622e-05	2.533e-05	0	1.611e-05	0	3.097e-05	-7.205	-1.9182	0.630229	0.949034	0.252086	-7.926	-2.3326	0.404147	0.926296	0.15603
CIR1	NP_004873.3	corepressor interacting with RBPJ 1 [Homo sapiens]	3.091e-05	1.129e-05	1.729e-05	0	0	2.071e-05	-7.204	-2.0509	0.56276	0.942716	0.219811	-7.844	-2.2958	0.419951	0.928455	0.163449
RPS6KA4	NP_001006945.1	1 genes:RPS6KA4.NP_001006945.1:ribosomal protein S6 kinase alpha-4 isoform b [Homo sapiens] ;NP_001287731.1:ribosomal protein S6 kinase alpha-4 isoform c [Homo sapiens] ;NP_001305290.1:ribosomal protein S6 kinase alpha-4 isoform d [Homo sapiens] ;NP_003933.1:ribosomal protein S6 kinase alpha-4 isoform a [Homo sapiens] ;	9.08e-06	9.95e-06	0	1.266e-05	9.33e-06	2.738e-05	-7.202	-1.7554	0.716949	0.955592	0.29409	0.488	0.862	1	0.601254	0.969375
AKAP11	NP_057332.1	A-kinase anchor protein 11 [Homo sapiens]	1.098e-05	0	0	0	0	2.45e-06	-7.201	-2.3252	0.435099	0.928738	0.163079	-1.637	-0.4237	1	0.911994	0.70195
OGFRL1	NP_001311195.1	1 genes:OGFRL1.NP_001311195.1:opioid growth factor receptor-like protein 1 isoform a [Homo sapiens] ;NP_078852.3:opioid growth factor receptor-like protein 1 isoform b [Homo sapiens] ;	1.539e-05	1.124e-05	1.148e-05	0	1.054e-05	1.031e-05	-7.187	-2.0092	0.583605	0.944676	0.229234	-0.237	-0.7463	1	0.946581	0.596486
SHPK	NP_037408.2	sedoheptulokinase [Homo sapiens]	1.455e-05	1.063e-05	2.17e-05	0	2.99e-05	1.462e-05	-7.185	-1.9025	0.63842	0.949628	0.255461	0.506	1.1479	1	0.511769	0.987922
AASDHPPT	NP_056238.2	L-aminoadipate-semialdehyde dehydrogenase-phosphopantetheinyl transferase [Homo sapiens]	6.753e-05	4.112e-05	5.036e-05	0	3.854e-05	6.033e-05	-7.185	-1.6977	0.74849	0.957456	0.308843	-0.072	-0.1409	1	0.867248	0.782822
PDGFRB	NP_001341945.1	1 genes:PDGFRB.NP_001341945.1:platelet-derived growth factor receptor beta isoform 2 [Homo sapiens] ;NP_001341946.1:platelet-derived growth factor receptor beta isoform 3 [Homo sapiens] ;NP_002600.1:platelet-derived growth factor receptor beta isoform 1 precursor [Homo sapiens] ;	6.68e-06	1.219e-05	0	4.65e-06	4.57e-06	6.71e-06	-7.174	-1.928	0.625138	0.948432	0.248758	-0.467	-1.0342	1	0.961272	0.505047
ARHGAP32	NP_001136157.1	rho GTPase-activating protein 32 isoform 1 [Homo sapiens]	5e-06	0	0	0	0	0	-7.171	-2.5029	0.362192	0.919294	0.131907	-5.543	-1.344	0.924365	0.964791	0.403264
ANKS1A	NP_056060.2	ankyrin repeat and SAM domain-containing protein 1A [Homo sapiens]	9.2e-06	0	0	0	0	0	-7.169	-1.8106	0.687131	0.953555	0.279707	-7.946	-2.3573	0.393746	0.924855	0.151214
PRKCD	NP_001341605.1	1 genes:PRKCD.NP_001341605.1:protein kinase C delta type isoform a [Homo sapiens] ;NP_001341607.1:protein kinase C delta type isoform b [Homo sapiens] ;NP_997704.1:protein kinase C delta type isoform c [Homo sapiens] ;	2.502e-05	1.828e-05	7.46e-06	0	6.85e-06	1.341e-05	-7.165	-2.0135	0.581439	0.944677	0.229214	-0.8	-1.875	0.624608	0.949367	0.253744
HSPB8	NP_055180.1	heat shock protein beta-8 [Homo sapiens]	0.00010646	0	0	0	2.431e-05	0	-7.165	-1.7733	0.707238	0.955101	0.290454	1.915	0.4529	1	0.725561	0.916106
OSBP2	NP_001269667.1	oxysterol-binding protein 2 isoform c [Homo sapiens]	5.13e-06	0	0	0	0	0	-7.163	-1.7775	0.704966	0.954592	0.286873	-7.209	-2.3251	0.407339	0.926296	0.156058
NSL1	NP_056286.3	kinetochore-associated protein NSL1 homolog isoform 1 [Homo sapiens]	6.188e-05	1.809e-05	5.537e-05	0	6.782e-05	3.317e-05	-7.16	-2.071	0.552837	0.942054	0.216699	0.4	0.5898	1	0.687149	0.936818
CMC2	NP_001338902.1	1 genes:CMC2.NP_001338902.1:COX assembly mitochondrial protein 2 homolog isoform 2 [Homo sapiens] ;NP_064573.1:COX assembly mitochondrial protein 2 homolog isoform 1 [Homo sapiens] ;	6.155e-05	6.746e-05	0	0.00012872	0	0.0001031	-7.159	-1.8732	0.653812	0.950792	0.26228	-7.841	-2.2184	0.454365	0.932029	0.176374
BCL9L	NP_872363.1	B-cell CLL/lymphoma 9-like protein [Homo sapiens]	9.28e-06	0	0	0	3.18e-06	3.11e-06	-7.156	-1.6526	0.773363	0.958729	0.320147	5.363	1.6172	0.898772	0.362132	0.992855
SNIP1	NP_078976.2	smad nuclear-interacting protein 1 [Homo sapiens]	0	1.925e-05	0	0	3.008e-05	1.177e-05	-7.154	-1.8307	0.676371	0.952476	0.272685	6.257	2.0469	0.655441	0.245835	0.977861
LRIF1	NP_060842.3	ligand-dependent nuclear receptor-interacting factor 1 isoform 1 [Homo sapiens]	1.357e-05	6.61e-06	0	6.3e-06	0	1.212e-05	-7.152	-2.2957	0.447979	0.930903	0.17088	-7.064	-2.4806	0.34433	0.918377	0.130775
RBSN	NP_001289307.1	rabenosyn-5 [Homo sapiens]	0	9.72e-06	0	0	1.823e-05	0	-7.151	-2.1221	0.527992	0.93935	0.204622	-0.115	-0.0292	1	0.846416	0.810923
PRUNE2	NP_001294976.1	1 genes:PRUNE2.NP_001294976.1:protein prune homolog 2 isoform 2 [Homo sapiens] ;NP_001294977.1:protein prune homolog 2 isoform 3 [Homo sapiens] ;NP_056040.2:protein prune homolog 2 isoform 1 [Homo sapiens] ;	0	1.66e-06	0	0	2.33e-06	0	-7.151	-1.9112	0.633876	0.949632	0.255442	-0.515	-0.1187	1	0.862234	0.790001
KIF18A	NP_112494.3	kinesin-like protein KIF18A [Homo sapiens]	0	5.66e-06	0	0	0	7.78e-06	-7.141	-2.3331	0.431686	0.928738	0.163053	1.135	0.3324	1	0.758301	0.894573
ZFP64	NP_060667.2	zinc finger protein 64 isoform a [Homo sapiens]	1.021e-05	0	0	0	2.33e-06	0	-7.141	-2.1512	0.514095	0.937973	0.198729	-0.806	-0.202	1	0.879215	0.764444
SLC38A10	NP_001033073.1	putative sodium-coupled neutral amino acid transporter 10 isoform a [Homo sapiens]	6.22e-06	0	0	0	6.39e-06	0	-7.137	-2.2385	0.47356	0.933762	0.181696	-0.838	-0.2434	1	0.886004	0.753131
ARFGEF3	NP_065073.3	brefeldin A-inhibited guanine nucleotide-exchange protein 3 [Homo sapiens]	6.39e-06	0	0	0	2.19e-06	0	-7.137	-2.0813	0.547785	0.941384	0.213648	-2.72	-0.602	1	0.933791	0.643726
BCAR3	NP_001248337.1	1 genes:BCAR3.NP_001248337.1:breast cancer anti-estrogen resistance protein 3 isoform 1 [Homo sapiens] ;NP_001248339.1:breast cancer anti-estrogen resistance protein 3 isoform 2 [Homo sapiens] ;	8.43e-06	0	0	0	0	0	-7.134	-2.3693	0.41625	0.926563	0.155475	-7.035	-2.0252	0.546866	0.942398	0.218889
DPF3	NP_001267471.1	1 genes:DPF3.NP_001267471.1:zinc finger protein DPF3 isoform 2 [Homo sapiens] ;NP_001267472.1:zinc finger protein DPF3 isoform 3 [Homo sapiens] ;NP_001267473.1:zinc finger protein DPF3 isoform 4 [Homo sapiens] ;NP_036206.3:zinc finger protein DPF3 isoform 1 [Homo sapiens] ;	3.68e-05	2.689e-05	0	4.489e-05	0	3.082e-05	-7.126	-2.3784	0.412422	0.926565	0.155458	-7.964	-2.2448	0.44245	0.930603	0.171141
TROAP	NP_005471.3	tastin isoform 1 [Homo sapiens]	0	6.53e-06	0	0	9.19e-06	0	-7.125	-1.8047	0.6903	0.953553	0.279729	1.572	0.3707	1	0.747597	0.902053
CCDC71L	NP_787080.2	coiled-coil domain-containing protein 71L [Homo sapiens]	2.96e-05	3.244e-05	3.311e-05	0	0	0	-7.124	-2.2311	0.476927	0.933761	0.181716	-17.235	-57.4733	0	0.832142	0
ZBTB40	NP_001317327.1	1 genes:ZBTB40.NP_001317327.1:zinc finger and BTB domain-containing protein 40 isoform b [Homo sapiens] ;NP_055685.3:zinc finger and BTB domain-containing protein 40 isoform a [Homo sapiens] ;	1.543e-05	1.353e-05	0	1.721e-05	0	1.034e-05	-7.115	-1.9429	0.617428	0.947823	0.245434	-6.27	-1.7586	0.687761	0.954436	0.284423
CASP2	NP_116764.2	caspase-2 isoform 1 preproprotein [Homo sapiens]	2.308e-05	1.124e-05	1.721e-05	0	0	1.031e-05	-7.109	-1.9533	0.612069	0.947206	0.242159	-7.661	-2.5901	0.30399	0.911982	0.112392
TNS2	NP_056134.2	tensin-2 isoform 1 [Homo sapiens]	2.002e-05	2.149e-05	0	8.54e-06	3.39e-06	2.463e-05	-7.099	-1.9506	0.613459	0.947826	0.245413	-0.742	-0.5232	1	0.925222	0.669005
UBE2O	NP_071349.3	(E3-independent) E2 ubiquitin-conjugating enzyme [Homo sapiens]	5.38e-06	0	0	0	7.37e-06	7.21e-06	-7.097	-2.2877	0.451509	0.930901	0.170894	5.262	1.351	1	0.443784	0.993786
FAM65A	NP_001180451.1	1 genes:RIPOR1.NP_001180451.1:rho family-interacting cell polarization regulator 1 isoform 2 [Homo sapiens] ;NP_001180452.1:rho family-interacting cell polarization regulator 1 isoform 3 [Homo sapiens] ;NP_001180453.1:rho family-interacting cell polarization regulator 1 isoform 4 [Homo sapiens] ;NP_078795.2:rho family-interacting cell polarization regulator 1 isoform 1 [Homo sapiens] ;	1.422e-05	0	0	0	3.9e-06	5.72e-06	-7.091	-2.0777	0.549548	0.941383	0.213665	6.189	1.6438	0.883395	0.354277	0.992339
GLE1	NP_001003722.1	1 genes:GLE1.NP_001003722.1:nucleoporin GLE1 isoform 1 [Homo sapiens] ;NP_001490.1:nucleoporin GLE1 isoform 2 [Homo sapiens] ;	1.993e-05	1.456e-05	0	1.042e-05	1.365e-05	0	-7.088	-2.1142	0.531796	0.940033	0.207589	-7.097	-1.6804	0.731333	0.957402	0.305916
ZSCAN21	NP_666019.1	zinc finger and SCAN domain-containing protein 21 isoform 1 [Homo sapiens]	1.47e-05	0	0	0	0	0	-7.081	-2.2837	0.45328	0.930901	0.170911	-8.237	-2.4805	0.344369	0.918377	0.130775
TANGO6	NP_078838.1	transport and Golgi organization protein 6 homolog [Homo sapiens]	6.36e-06	0	0	0	0	6.39e-06	-7.076	-2.0333	0.571516	0.944031	0.226035	0.045	0.0112	1	0.835242	0.824318
PIAS3	NP_006090.2	E3 SUMO-protein ligase PIAS3 [Homo sapiens]	2.215e-05	1.619e-05	0	1.544e-05	0	1.484e-05	-7.073	-1.9421	0.617841	0.947823	0.245438	-7.922	-1.9597	0.580196	0.945654	0.234347
CFAP97	NP_065878.1	cilia- and flagella-associated protein 97 isoform 1 [Homo sapiens]	3.269e-05	0	0	0	0	0	-7.069	-1.8662	0.657509	0.951364	0.265698	-8.822	-2.403	0.374941	0.922693	0.144166
ZNF652	NP_001138837.1	zinc finger protein 652 [Homo sapiens]	5.74e-06	0	0	0	0	7.69e-06	-7.067	-1.9888	0.593925	0.945956	0.235614	0.166	0.044	1	0.829467	0.830847
APAF1	NP_001151.1	1 genes:APAF1.NP_001151.1:apoptotic protease-activating factor 1 isoform b [Homo sapiens] ;NP_037361.1:apoptotic protease-activating factor 1 isoform a [Homo sapiens] ;NP_863651.1:apoptotic protease-activating factor 1 isoform c [Homo sapiens] ;NP_863658.1:apoptotic protease-activating factor 1 isoform d [Homo sapiens] ;	1.165e-05	4.26e-06	4.34e-06	0	3.99e-06	5.85e-06	-7.056	-1.9742	0.601359	0.946585	0.238859	-0.375	-0.5514	1	0.928207	0.660622
RABGAP1	NP_036329.3	rab GTPase-activating protein 1 [Homo sapiens]	1.627e-05	0	0	0	4.46e-06	0	-7.053	-2.1031	0.537165	0.940713	0.210596	-1.722	-0.4015	1	0.910188	0.706011
UBAP2L	NP_001274745.1	ubiquitin-associated protein 2-like isoform d [Homo sapiens]	6.775e-05	1.273e-05	0	2.024e-05	3.241e-05	5.044e-05	-7.051	-2.0295	0.573414	0.94403	0.226041	0.42	0.4945	1	0.714247	0.922676
SMAD1	NP_001341745.1	mothers against decapentaplegic homolog 1 [Homo sapiens]	1.045e-05	0	0	0	5.891e-05	3.749e-05	-7.051	-1.9734	0.601768	0.946585	0.238862	8.649	2.2478	0.55046	0.19935	0.96737
INPP5F	NP_055752.1	phosphatidylinositide phosphatase SAC2 isoform 1 [Homo sapiens]	1.229e-05	0	0	0	0	0	-7.051	-1.7808	0.703182	0.954593	0.286859	-8.051	-2.4133	0.370782	0.921972	0.141874
TPD52L1	NP_001003395.1	1 genes:TPD52L1.NP_001003395.1:tumor protein D53 isoform 2 [Homo sapiens] ;NP_001003396.1:tumor protein D53 isoform 3 [Homo sapiens] ;NP_001003397.1:tumor protein D53 isoform 4 [Homo sapiens] ;NP_001278955.1:tumor protein D53 isoform 5 [Homo sapiens] ;NP_001287923.1:tumor protein D53 isoform 6 [Homo sapiens] ;NP_001305832.1:tumor protein D53 isoform 7 [Homo sapiens] ;NP_003278.1:tumor protein D53…	3.975e-05	2.904e-05	0	4.156e-05	9.528e-05	6.658e-05	-7.049	-2.2821	0.45399	0.931621	0.173543	0.88	2.4404	0.458235	0.15858	0.955839
CKAP4	NP_006816.2	cytoskeleton-associated protein 4 [Homo sapiens]	1.155e-05	0	0	0	1.978e-05	7.74e-06	-7.044	-1.7632	0.712713	0.955096	0.290483	7.125	2.2464	0.551163	0.199347	0.967371
COG8	NP_115758.3	conserved oligomeric Golgi complex subunit 8 isoform 1 [Homo sapiens]	1.705e-05	0	0	0	1.557e-05	1.904e-05	-7.043	-2.4794	0.371363	0.920746	0.136397	6.955	1.7004	0.85069	0.338788	0.991107
EGLN1	NP_071334.1	egl nine homolog 1 [Homo sapiens]	0	1.193e-05	0	0	0	2.188e-05	-7.042	-1.9527	0.612378	0.947827	0.245412	-0.702	-0.1938	1	0.876888	0.768163
DOCK1	NP_001277152.1	0 genes:. 2 proteins in this group did not match any genes. NP_001277152.1:dedicator of cytokinesis protein 1 isoform 1 [Homo sapiens] ;NP_001371.1:dedicator of cytokinesis protein 1 isoform 2 [Homo sapiens] ;	2.397e-05	5.39e-06	5.5e-06	0	2.53e-06	2.47e-06	-7.039	-1.7566	0.716297	0.955593	0.294088	-1.354	-1.7026	0.718882	0.956454	0.29868
WDFY3	NP_055806.2	WD repeat and FYVE domain-containing protein 3 [Homo sapiens]	7.89e-06	2.16e-06	0	2.75e-06	2.03e-06	5.29e-06	-7.031	-2.0961	0.540564	0.94071	0.210609	-0.239	-0.2726	1	0.890365	0.745476
SURF6	NP_001265871.1	1 genes:SURF6.NP_001265871.1:surfeit locus protein 6 isoform 2 [Homo sapiens] ;NP_006744.2:surfeit locus protein 6 isoform 1 [Homo sapiens] ;	7.061e-05	2.58e-05	5.266e-05	0	7.255e-05	3.548e-05	-7.029	-1.6572	0.770819	0.958731	0.320127	0.17	0.2345	1	0.785732	0.873174
ARAP1	NP_001356418.1	arf-GAP with Rho-GAP domain, ANK repeat and PH domain-containing protein 1 isoform e [Homo sapiens]	1.019e-05	3.19e-06	0	6.09e-06	2.99e-06	9.76e-06	-7.021	-2.331	0.432591	0.928738	0.163057	-0.026	-0.0349	1	0.846416	0.81092
IGBP1	NP_001357122.1	1 genes:IGBP1.NP_001357122.1:immunoglobulin-binding protein 1 isoform 1 [Homo sapiens] ;NP_001357123.1:immunoglobulin-binding protein 1 isoform 2 [Homo sapiens] ;	8.207e-05	3.748e-05	0	4.291e-05	0	4.124e-05	-7.018	-1.7644	0.712062	0.955096	0.290477	-8.772	-2.5373	0.323024	0.914809	0.12033
GAS2L1	NP_001265659.1	1 genes:GAS2L1.NP_001265659.1:GAS2-like protein 1 isoform c [Homo sapiens] ;NP_006469.2:GAS2-like protein 1 isoform a [Homo sapiens] ;	0	1.119e-05	0	0	1.049e-05	1.026e-05	-7.014	-1.8	0.692827	0.954082	0.283263	6.744	2.0237	0.668049	0.25246	0.979137
NCK2	NP_001004720.1	cytoplasmic protein NCK2 isoform A [Homo sapiens]	4.576e-05	2.675e-05	0	1.914e-05	4.388e-05	2.453e-05	-7.013	-1.9103	0.634346	0.949631	0.255442	-0.104	-0.175	1	0.874526	0.77187
GPX4	NP_001034936.1	1 genes:GPX4.NP_001034936.1:phospholipid hydroperoxide glutathione peroxidase isoform B precursor [Homo sapiens] ;NP_001034937.1:phospholipid hydroperoxide glutathione peroxidase isoform C [Homo sapiens] ;NP_001354761.1:phospholipid hydroperoxide glutathione peroxidase isoform D [Homo sapiens] ;NP_002076.2:phospholipid hydroperoxide glutathione peroxidase isoform A precursor [Homo sapiens] ;	3.064e-05	0	0	0	0	0	-7.013	-1.8461	0.668166	0.951924	0.269186	-8.556	-2.3761	0.385941	0.924135	0.148833
SAP130	NP_001317229.1	histone deacetylase complex subunit SAP130 isoform d [Homo sapiens]	1.192e-05	6.22e-06	0	4.75e-06	2.333e-05	0	-7.007	-2.162	0.508986	0.937278	0.195837	-5.768	-1.733	0.701935	0.955466	0.291496
PFN2	NP_444252.1	profilin-2 isoform a [Homo sapiens]	9.936e-05	7.26e-05	8.151e-05	0	4.915e-05	4.993e-05	-7.001	-2.1758	0.502496	0.936581	0.192959	-0.516	-1.6494	0.748813	0.958304	0.313277
SETDB1	NP_001138887.1	1 genes:SETDB1.NP_001138887.1:histone-lysine N-methyltransferase SETDB1 isoform 1 [Homo sapiens] ;NP_001353346.1:histone-lysine N-methyltransferase SETDB1 isoform 4 [Homo sapiens] ;NP_036564.3:histone-lysine N-methyltransferase SETDB1 isoform 2 [Homo sapiens] ;	1.078e-05	9.84e-06	2.611e-05	0	1.845e-05	1.624e-05	-7.001	-1.844	0.669283	0.951923	0.269197	0.557	1.9262	0.721937	0.276342	0.983321
DCPS	NP_001337165.1	1 genes:DCPS.NP_001337165.1:m7GpppX diphosphatase isoform 1 [Homo sapiens] ;NP_054745.1:m7GpppX diphosphatase isoform 2 [Homo sapiens] ;	4.044e-05	2.216e-05	0	3.524e-05	9.694e-05	0.00014902	-6.99	-1.6087	0.797721	0.960256	0.335454	1.354	2.7148	0.343497	0.113319	0.940002
KLHL5	NP_001007076.1	1 genes:KLHL5.NP_001007076.1:kelch-like protein 5 isoform 3 [Homo sapiens] ;NP_001165125.1:kelch-like protein 5 isoform 4 [Homo sapiens] ;NP_057074.3:kelch-like protein 5 isoform 1 [Homo sapiens] ;NP_950240.2:kelch-like protein 5 isoform 2 [Homo sapiens] ;	9.81e-06	2.509e-05	4.755e-05	0	1.344e-05	9.86e-06	-6.987	-2.013	0.581691	0.944677	0.229216	-0.364	-0.5537	1	0.928209	0.660618
PFKFB3	NP_001138915.1	1 genes:PFKFB3.NP_001138915.1:6-phosphofructo-2-kinase/fructose-2,6-bisphosphatase 3 isoform 2 [Homo sapiens] ;NP_001269559.1:6-phosphofructo-2-kinase/fructose-2,6-bisphosphatase 3 isoform 3 [Homo sapiens] ;NP_001300992.1:6-phosphofructo-2-kinase/fructose-2,6-bisphosphatase 3 isoform 4 [Homo sapiens] ;NP_001309945.1:6-phosphofructo-2-kinase/fructose-2,6-bisphosphatase 3 isoform 5 [Homo sapiens] ;…	1.391e-05	0	0	0	9.53e-06	9.32e-06	-6.983	-1.5455	0.832975	0.961549	0.351129	5.091	1.1483	1	0.51177	0.987921
ZNF292	NP_001338373.1	1 genes:ZNF292.NP_001338373.1:zinc finger protein 292 isoform 2 [Homo sapiens] ;NP_055836.1:zinc finger protein 292 isoform 1 [Homo sapiens] ;	0	2.95e-06	0	0	1.84e-06	1.8e-06	-6.977	-1.7364	0.727297	0.956073	0.297762	5.946	1.9788	0.692694	0.262547	0.980989
PHLDA1	NP_031376.3	pleckstrin homology-like domain family A member 1 [Homo sapiens]	1.735e-05	1.267e-05	0	1.209e-05	2.376e-05	1.162e-05	-6.969	-1.8374	0.672798	0.952478	0.272657	0.104	0.2185	1	0.789041	0.870354
PIK3R2	NP_005018.2	phosphatidylinositol 3-kinase regulatory subunit beta [Homo sapiens]	1.911e-05	0	0	0	0	0	-6.969	-1.753	0.718254	0.955591	0.294098	-8.134	-2.3834	0.382936	0.923413	0.146498
SLC2A1	NP_006507.2	solute carrier family 2, facilitated glucose transporter member 1 [Homo sapiens]	1.414e-05	1.549e-05	1.581e-05	0	2.421e-05	1.894e-05	-6.967	-2.3231	0.436009	0.929462	0.165633	0.361	1.2079	1	0.490386	0.990468
NFAT5	NP_001106649.1	1 genes:NFAT5.NP_001106649.1:nuclear factor of activated T-cells 5 isoform d [Homo sapiens] ;NP_001354638.1:nuclear factor of activated T-cells 5 isoform e [Homo sapiens] ;NP_006590.1:nuclear factor of activated T-cells 5 isoform c [Homo sapiens] ;NP_619727.2:nuclear factor of activated T-cells 5 isoform b [Homo sapiens] ;NP_775322.1:nuclear factor of activated T-cells 5 isoform a [Homo sapiens] ;	8.99e-06	3.28e-06	0	6.26e-06	3.08e-06	3.01e-06	-6.966	-2.4063	0.400817	0.924383	0.148142	-0.614	-1.2478	0.979607	0.964982	0.436515
CLCN3	NP_001230301.1	1 genes:CLCN3.NP_001230301.1:H(+)/Cl(-) exchange transporter 3 isoform a [Homo sapiens] ;NP_001230303.1:H(+)/Cl(-) exchange transporter 3 isoform c [Homo sapiens] ;NP_001820.2:H(+)/Cl(-) exchange transporter 3 isoform b [Homo sapiens] ;NP_776297.2:H(+)/Cl(-) exchange transporter 3 isoform e [Homo sapiens] ;	8.79e-06	6.43e-06	0	6.13e-06	0	5.89e-06	-6.957	-1.6402	0.78023	0.95913	0.323945	-7.137	-1.923	0.599266	0.947542	0.243916
CYTH3	NP_001354509.1	1 genes:CYTH3.NP_001354509.1:cytohesin-3 isoform b [Homo sapiens] ;NP_001354510.1:cytohesin-3 isoform c [Homo sapiens] ;NP_004218.1:cytohesin-3 isoform a [Homo sapiens] ;	3.323e-05	0	0	0	1.517e-05	0	-6.955	-1.7589	0.715047	0.955595	0.294085	-1.834	-0.4845	1	0.920504	0.681471
OARD1	NP_001316615.1	1 genes:OARD1.NP_001316615.1:ADP-ribose glycohydrolase OARD1 isoform a [Homo sapiens] ;NP_001316618.1:ADP-ribose glycohydrolase OARD1 isoform b [Homo sapiens] ;	4.576e-05	3.344e-05	3.412e-05	0	3.134e-05	6.132e-05	-6.953	-1.757	0.71608	0.955593	0.294087	0.166	0.4193	1	0.736685	0.909227
ITGA7	NP_001138468.1	1 genes:ITGA7.NP_001138468.1:integrin alpha-7 isoform 1 precursor [Homo sapiens] ;NP_001138469.1:integrin alpha-7 isoform 3 [Homo sapiens] ;NP_001354922.1:integrin alpha-7 isoform 4 [Homo sapiens] ;NP_001354923.1:integrin alpha-7 isoform 5 [Homo sapiens] ;NP_001361394.1:integrin alpha-7 isoform 6 [Homo sapiens] ;NP_002197.2:integrin alpha-7 isoform 2 precursor [Homo sapiens] ;	6.1e-06	4.45e-06	0	4.25e-06	8.35e-06	8.17e-06	-6.947	-2.3737	0.414396	0.926564	0.155463	0.438	1.3768	1	0.439626	0.993932
ADAT3	NP_001316462.1	1 genes:ADAT3.NP_001316462.1:probable inactive tRNA-specific adenosine deaminase-like protein 3 isoform 2 [Homo sapiens] ;NP_612431.2:probable inactive tRNA-specific adenosine deaminase-like protein 3 isoform 1 [Homo sapiens] ;	1.982e-05	0	0	0	1.357e-05	1.328e-05	-6.945	-1.8719	0.654498	0.950792	0.262287	7.442	2.7098	0.345403	0.11331	0.940002
AACS	NP_001306768.1	1 genes:AACS.NP_001306768.1:acetoacetyl-CoA synthetase isoform 2 [Homo sapiens] ;NP_001306769.1:acetoacetyl-CoA synthetase isoform 3 [Homo sapiens] ;NP_076417.2:acetoacetyl-CoA synthetase isoform 1 [Homo sapiens] ;	1.161e-05	0	0	0	0	1.556e-05	-6.942	-1.8702	0.655395	0.951367	0.265694	-0.9	-0.2157	1	0.881511	0.760696
NAA38	NP_001307853.1	1 genes:NAA38.NP_001307853.1:N-alpha-acetyltransferase 38, NatC auxiliary subunit isoform 2 [Homo sapiens] ;NP_001307854.1:N-alpha-acetyltransferase 38, NatC auxiliary subunit isoform 3 [Homo sapiens] ;NP_001317040.1:N-alpha-acetyltransferase 38, NatC auxiliary subunit isoform 4 [Homo sapiens] ;NP_115732.2:N-alpha-acetyltransferase 38, NatC auxiliary subunit isoform 1 precursor [Homo sapiens] ;	0.0001288	5.647e-05	3.842e-05	0	7.058e-05	3.452e-05	-6.923	-1.7842	0.701345	0.954595	0.28685	-0.54	-0.9166	1	0.956459	0.544225
RABL6	NP_001167459.1	1 genes:RABL6.NP_001167459.1:rab-like protein 6 isoform 3 [Homo sapiens] ;NP_001167460.1:rab-like protein 6 isoform 4 [Homo sapiens] ;NP_078994.3:rab-like protein 6 isoform 1 [Homo sapiens] ;	0	6.96e-06	0	0	0	1.277e-05	-6.916	-1.8778	0.651387	0.950793	0.262262	-0.497	-0.1283	1	0.864756	0.786425
ZNF609	NP_055857.1	zinc finger protein 609 [Homo sapiens]	7.39e-06	5.4e-06	7.35e-06	0	6.75e-06	0	-6.902	-1.8868	0.646651	0.950214	0.258863	-6.456	-1.7131	0.713014	0.956459	0.298649
REPS1	NP_001122089.1	1 genes:REPS1.NP_001122089.1:ralBP1-associated Eps domain-containing protein 1 isoform b [Homo sapiens] ;NP_001273540.1:ralBP1-associated Eps domain-containing protein 1 isoform c [Homo sapiens] ;NP_001273541.1:ralBP1-associated Eps domain-containing protein 1 isoform d [Homo sapiens] ;NP_114128.3:ralBP1-associated Eps domain-containing protein 1 isoform a [Homo sapiens] ;	2.713e-05	1.322e-05	1.349e-05	0	1.549e-05	1.818e-05	-6.899	-2.2335	0.475834	0.933761	0.181707	-0.091	-0.2017	1	0.879215	0.764444
PIKFYVE	NP_055855.2	1-phosphatidylinositol 3-phosphate 5-kinase isoform 2 [Homo sapiens]	3.32e-06	0	0	0	0	0	-6.895	-2.1721	0.504232	0.937281	0.195813	-7.397	-2.4071	0.373282	0.921972	0.141892
DCAF12	NP_056212.1	DDB1- and CUL4-associated factor 12 [Homo sapiens]	1.535e-05	0	0	0	1.052e-05	0	-6.889	-1.5448	0.833366	0.961548	0.351132	0.1	0.032	1	0.832369	0.827598
TGOLN2	NP_001193769.1	1 genes:TGOLN2.NP_001193769.1:trans-Golgi network integral membrane protein 2 isoform 2 precursor [Homo sapiens] ;NP_001193770.1:trans-Golgi network integral membrane protein 2 isoform 3 precursor [Homo sapiens] ;NP_001355024.1:trans-Golgi network integral membrane protein 2 isoform 5 precursor [Homo sapiens] ;NP_001355025.1:trans-Golgi network integral membrane protein 2 isoform 6 precursor [Hom…	2.898e-05	0	0	0	0	0	-6.885	-2.096	0.540612	0.94071	0.210609	-7.039	-1.7495	0.692788	0.954958	0.287937
DENND4C	NP_001317569.1	1 genes:DENND4C.NP_001317569.1:DENN domain-containing protein 4C isoform 2 [Homo sapiens] ;NP_060395.5:DENN domain-containing protein 4C isoform 1 [Homo sapiens] ;	1.066e-05	7.79e-06	0	7.43e-06	0	7.14e-06	-6.883	-1.8613	0.660102	0.951363	0.265713	-7.707	-3.1353	0.151319	0.885736	0.051576
ARHGEF17	NP_055601.2	rho guanine nucleotide exchange factor 17 [Homo sapiens]	6.74e-06	3.7e-06	0	4.7e-06	2.31e-06	7.91e-06	-6.876	-1.7619	0.713418	0.955096	0.29049	-0.177	-0.2585	1	0.888201	0.749314
SUPT20H	NP_001014308.2	1 genes:SUPT20H.NP_001014308.2:transcription factor SPT20 homolog isoform a [Homo sapiens] ;NP_001265409.1:transcription factor SPT20 homolog isoform c [Homo sapiens] ;NP_001265411.1:transcription factor SPT20 homolog isoform b [Homo sapiens] ;	8.93e-06	0	0	0	0	0	-6.876	-1.7232	0.734508	0.956545	0.301435	-7.538	-2.4022	0.375266	0.922693	0.144167
CCNDBP1	NP_036274.3	cyclin-D1-binding protein 1 [Homo sapiens]	2.898e-05	2.118e-05	4.322e-05	0	3.97e-05	7.12e-05	-6.871	-1.8485	0.666891	0.951924	0.269176	0.787	1.647	0.881546	0.354292	0.992338
CEMIP	NP_001280227.1	cell migration-inducing and hyaluronan-binding protein precursor [Homo sapiens]	1.278e-05	3.73e-06	7.62e-06	0	5.25e-06	3.42e-06	-6.869	-1.9024	0.638472	0.949628	0.255462	-0.488	-0.7272	1	0.944534	0.605122
SEPSECS	NP_058651.3	O-phosphoseryl-tRNA(Sec) selenium transferase [Homo sapiens]	1.388e-05	2.029e-05	0	1.936e-05	0	0	-6.85	-1.9397	0.61908	0.947823	0.245451	-16.625	-43.1195	0	0.83498	0
	NP_001139511.1	1 genes:GORAB. 2 proteins in this group did not match any genes. NP_001139511.1:RAB6-interacting golgin isoform b precursor [Homo sapiens] ;NP_001139511.2:RAB6-interacting golgin isoform b [Homo sapiens] ;NP_689494.2:RAB6-interacting golgin isoform a precursor [Homo sapiens] ;NP_689494.3:RAB6-interacting golgin isoform a [Homo sapiens] ;	0	2.066e-05	0	0	0	1.894e-05	-6.842	-1.7556	0.716841	0.955592	0.29409	-0.168	-0.0378	1	0.846417	0.810919
ATP6V0A1	NP_001123492.1	1 genes:ATP6V0A1.NP_001123492.1:V-type proton ATPase 116 kDa subunit a isoform 1 isoform a [Homo sapiens] ;NP_001123493.1:V-type proton ATPase 116 kDa subunit a isoform 1 isoform b [Homo sapiens] ;NP_005168.2:V-type proton ATPase 116 kDa subunit a isoform 1 isoform c [Homo sapiens] ;	8.3e-06	6.06e-06	6.19e-06	0	8.53e-06	1.39e-05	-6.841	-2.1038	0.536826	0.940713	0.210595	0.429	1.0695	1	0.537458	0.983955
SUFU	NP_001171604.1	1 genes:SUFU.NP_001171604.1:suppressor of fused homolog isoform 2 [Homo sapiens] ;NP_057253.2:suppressor of fused homolog isoform 1 [Homo sapiens] ;	1.606e-05	0	0	0	0	0	-6.837	-2.0904	0.54334	0.94071	0.210635	-7.336	-1.9131	0.604456	0.947539	0.243955
RUFY3	NP_001124181.1	protein RUFY3 isoform 3 [Homo sapiens]	2.062e-05	0	0	0	1.412e-05	0	-6.828	-2.1011	0.538135	0.940712	0.210597	-0.861	-0.282	1	0.892495	0.741624
TUBGCP6	NP_065194.3	gamma-tubulin complex component 6 [Homo sapiens]	1.147e-05	4.19e-06	0	5.33e-06	2.62e-06	6.4e-06	-6.828	-1.9727	0.602125	0.946584	0.238864	-0.563	-0.7468	1	0.946581	0.596484
MLLT3	NP_001273620.1	1 genes:MLLT3.NP_001273620.1:protein AF-9 isoform b [Homo sapiens] ;NP_004520.2:protein AF-9 isoform a [Homo sapiens] ;	1.847e-05	9e-06	0	2.574e-05	8.43e-06	2.062e-05	-6.825	-1.9066	0.636277	0.949629	0.255448	-0.026	-0.0396	1	0.846418	0.810919
SPTBN4	NP_066022.2	spectrin beta chain, non-erythrocytic 4 isoform sigma1 [Homo sapiens]	1.58e-06	0	0	0	0	0	-6.822	-1.7485	0.720702	0.95559	0.294118	-7.326	-2.2283	0.449875	0.93203	0.176338
PPIL1	NP_057143.1	peptidyl-prolyl cis-trans isomerase-like 1 [Homo sapiens]	8.38e-05	0	0	0	5.74e-05	0	-6.818	-1.8879	0.646073	0.950214	0.258858	-1.691	-0.4099	1	0.910192	0.705999
DYNLRB1	NP_001306086.1	dynein light chain roadblock-type 1 isoform d [Homo sapiens]	3.162e-05	0	0	0	0	0	-6.812	-1.8054	0.689923	0.953553	0.279725	-8.059	-2.255	0.437895	0.930604	0.171105
LMCD1	NP_001265162.1	1 genes:LMCD1.NP_001265162.1:LIM and cysteine-rich domains protein 1 isoform 2 [Homo sapiens] ;NP_001265163.1:LIM and cysteine-rich domains protein 1 isoform 3 [Homo sapiens] ;NP_055398.1:LIM and cysteine-rich domains protein 1 isoform 1 [Homo sapiens] ;	4.764e-05	1.74e-05	0	1.66e-05	1.632e-05	1.596e-05	-6.809	-2.0226	0.576869	0.944029	0.22607	-0.537	-1.0472	1	0.961679	0.500711
RELCH	NP_001333158.1	1 genes:RELCH.NP_001333158.1:RAB11-binding protein RELCH isoform a [Homo sapiens] ;NP_001333160.1:RAB11-binding protein RELCH isoform c [Homo sapiens] ;NP_001333162.1:RAB11-binding protein RELCH isoform d [Homo sapiens] ;NP_001333163.1:RAB11-binding protein RELCH isoform e [Homo sapiens] ;NP_065905.2:RAB11-binding protein RELCH isoform c [Homo sapiens] ;	2.782e-05	8.13e-06	1.037e-05	0	0	5.59e-06	-6.802	-1.9858	0.59545	0.945955	0.235624	-8.046	-1.8091	0.660087	0.952266	0.270557
DDX49	NP_061943.2	probable ATP-dependent RNA helicase DDX49 [Homo sapiens]	2.16e-05	1.052e-05	0	2.51e-05	9.86e-06	9.65e-06	-6.797	-1.787	0.699833	0.954597	0.286847	-0.369	-0.8716	1	0.954367	0.557316
UBXN4	NP_055422.1	UBX domain-containing protein 4 [Homo sapiens]	2.054e-05	1.501e-05	2.553e-05	0	9.38e-06	1.835e-05	-6.788	-1.9867	0.594992	0.945955	0.23562	-0.26	-0.5616	1	0.92965	0.656421
MACROD1	NP_054786.2	ADP-ribose glycohydrolase MACROD1 [Homo sapiens]	2.14e-05	0	0	0	1.466e-05	0	-6.781	-1.8402	0.671306	0.952479	0.272652	-0.101	-0.0294	1	0.846416	0.810923
GAPVD1	NP_001269608.1	1 genes:GAPVD1.NP_001269608.1:GTPase-activating protein and VPS9 domain-containing protein 1 isoform 1 [Homo sapiens] ;NP_001269609.1:GTPase-activating protein and VPS9 domain-containing protein 1 isoform 2 [Homo sapiens] ;NP_001317706.1:GTPase-activating protein and VPS9 domain-containing protein 1 isoform 5 [Homo sapiens] ;NP_001317707.1:GTPase-activating protein and VPS9 domain-containing prot…	4.71e-06	0	0	0	0	4.73e-06	-6.778	-1.8876	0.64623	0.950214	0.258859	0.134	0.0298	1	0.832369	0.827597
RTTN	NP_775901.3	rotatin isoform 1 [Homo sapiens]	4.69e-06	2.28e-06	0	2.18e-06	0	3.14e-06	-6.776	-2.1217	0.528184	0.939349	0.204623	-5.366	-1.281	0.960611	0.965053	0.423953
CEP44	NP_001035247.1	1 genes:CEP44.NP_001035247.1:centrosomal protein of 44 kDa isoform a [Homo sapiens] ;NP_001138786.1:centrosomal protein of 44 kDa isoform b [Homo sapiens] ;	1.783e-05	1.303e-05	1.33e-05	0	1.222e-05	1.195e-05	-6.773	-1.9686	0.604221	0.946584	0.238882	-0.21	-0.4454	1	0.915494	0.693808
PRKCA	NP_002728.2	protein kinase C alpha type [Homo sapiens]	1.035e-05	4.16e-05	0	3.607e-05	0	3.467e-05	-6.769	-1.7639	0.712333	0.955096	0.290479	-6.194	-1.5049	0.831426	0.962383	0.35511
HECTD3	NP_078878.3	E3 ubiquitin-protein ligase HECTD3 [Homo sapiens]	1.616e-05	5.9e-06	9.04e-06	0	0	8.12e-06	-6.768	-1.9285	0.624878	0.948432	0.248756	-6.747	-1.756	0.689196	0.954436	0.284435
KDM5C	NP_001140174.1	1 genes:KDM5C.NP_001140174.1:lysine-specific demethylase 5C isoform 2 [Homo sapiens] ;NP_001269551.1:lysine-specific demethylase 5C isoform 3 [Homo sapiens] ;NP_001340907.1:lysine-specific demethylase 5C isoform 4 [Homo sapiens] ;NP_001340908.1:lysine-specific demethylase 5C isoform 5 [Homo sapiens] ;NP_001340910.1:lysine-specific demethylase 5C isoform 6 [Homo sapiens] ;NP_001340911.1:lysine-spe…	5.04e-06	0	0	0	5.18e-06	0	-6.765	-2.5127	0.358409	0.919294	0.131878	-2.017	-0.4487	1	0.915496	0.693804
KIF13B	NP_056069.2	kinesin-like protein KIF13B [Homo sapiens]	1.143e-05	5.57e-06	5.33e-06	0	2.61e-06	1.021e-05	-6.75	-2.0475	0.564447	0.943378	0.222895	-0.335	-0.4221	1	0.911993	0.701952
LRCH1	NP_001157685.2	leucine-rich repeat and calponin homology domain-containing protein 1 isoform 3 [Homo sapiens]	1.499e-05	1.095e-05	1.49e-05	0	6.85e-06	6.7e-06	-6.742	-1.6682	0.76474	0.958317	0.316354	-0.63	-1.8176	0.655469	0.95227	0.270529
MTR	NP_000245.2	1 genes:MTR.NP_000245.2:methionine synthase isoform 1 [Homo sapiens] ;NP_001278868.1:methionine synthase isoform 2 [Homo sapiens] ;	5.5e-06	0	0	0	5.65e-06	5.53e-06	-6.74	-1.9864	0.595145	0.945955	0.235621	6.519	1.9454	0.711219	0.272874	0.98275
RECQL5	NP_004250.4	ATP-dependent DNA helicase Q5 isoform 1 [Homo sapiens]	1.053e-05	5.13e-06	0	4.89e-06	4.81e-06	4.7e-06	-6.736	-1.7481	0.72092	0.95559	0.29412	-0.429	-1.0527	1	0.962055	0.496402
STK17A	NP_004751.2	serine/threonine-protein kinase 17A [Homo sapiens]	3.36e-05	1.841e-05	1.253e-05	0	0	1.126e-05	-6.709	-1.7925	0.696866	0.954078	0.283283	-8.112	-1.9087	0.606769	0.948157	0.24716
ZNF335	NP_071378.1	zinc finger protein 335 [Homo sapiens]	5.18e-06	0	0	0	0	0	-6.706	-1.9474	0.615107	0.947824	0.245419	-7.073	-2.1736	0.474996	0.934859	0.187117
INPP4A	NP_001127696.1	1 genes:INPP4A.NP_001127696.1:inositol polyphosphate-4-phosphatase type I A isoform d [Homo sapiens] ;NP_001127697.1:inositol polyphosphate-4-phosphatase type I A isoform c [Homo sapiens] ;NP_001338353.1:inositol polyphosphate-4-phosphatase type I A isoform e [Homo sapiens] ;NP_001338355.1:inositol polyphosphate-4-phosphatase type I A isoform f [Homo sapiens] ;NP_001338357.1:inositol polyphosphat…	1.424e-05	7.8e-06	1.062e-05	0	9.75e-06	7.15e-06	-6.704	-2.0138	0.581289	0.944677	0.229213	-0.226	-0.5454	1	0.926738	0.66481
PBXIP1	NP_001304663.1	1 genes:PBXIP1.NP_001304663.1:pre-B-cell leukemia transcription factor-interacting protein 1 isoform 2 [Homo sapiens] ;NP_065385.2:pre-B-cell leukemia transcription factor-interacting protein 1 isoform 1 [Homo sapiens] ;	9.91e-06	1.086e-05	2.586e-05	0	2.715e-05	9.96e-06	-6.695	-2.0214	0.577471	0.94468	0.2292	0.448	0.8821	1	0.597054	0.970559
WDR46	NP_001157739.1	1 genes:WDR46.NP_001157739.1:WD repeat-containing protein 46 isoform 2 [Homo sapiens] ;NP_005443.3:WD repeat-containing protein 46 isoform 1 [Homo sapiens] ;	0	1.828e-05	0	0	0	0	-6.695	-1.8604	0.660578	0.951362	0.265717	-7.032	-1.9958	0.561711	0.943716	0.225009
NDC1	NP_001162023.1	1 genes:NDC1.NP_001162023.1:nucleoporin NDC1 isoform 2 [Homo sapiens] ;NP_060557.3:nucleoporin NDC1 isoform 1 [Homo sapiens] ;	1.097e-05	8.02e-06	0	1.147e-05	0	7.35e-06	-6.688	-1.7832	0.701885	0.954594	0.286852	-7.035	-1.8715	0.626473	0.949966	0.257028
ZNF280D	NP_001002843.1	1 genes:ZNF280D.NP_001002843.1:zinc finger protein 280D isoform 2 [Homo sapiens] ;NP_060131.2:zinc finger protein 280D isoform 1 [Homo sapiens] ;	7.2e-06	1.841e-05	0	5.02e-06	4.93e-06	1.688e-05	-6.676	-1.9501	0.613716	0.947826	0.245414	-0.194	-0.2691	1	0.890364	0.745481
TECPR2	NP_055659.2	tectonin beta-propeller repeat-containing protein 2 isoform 1 [Homo sapiens]	7.39e-06	3.6e-06	9.19e-06	0	8.44e-06	0	-6.671	-2.0401	0.568125	0.943376	0.222912	-5.997	-1.9653	0.57731	0.945657	0.234337
SMARCC2	NP_001123892.1	SWI/SNF complex subunit SMARCC2 isoform c [Homo sapiens]	4.679e-05	8.934e-05	0	0.00021311	0.00010132	8.394e-05	-6.655	-1.624	0.789217	0.959516	0.327783	0.329	0.7255	1	0.646977	0.954142
HECTD4	NP_001103132.4	probable E3 ubiquitin-protein ligase HECTD4 [Homo sapiens]	1.57e-06	1.72e-06	0	1.64e-06	0	1.05e-06	-6.62	-1.9586	0.609346	0.947207	0.242133	-6.984	-2.003	0.558058	0.943718	0.224987
MAGED1	NP_001005333.1	1 genes:MAGED1.NP_001005333.1:melanoma-associated antigen D1 isoform a [Homo sapiens] ;NP_008917.3:melanoma-associated antigen D1 isoform b [Homo sapiens] ;	1.251e-05	6.09e-06	0	5.81e-06	1.142e-05	5.59e-06	-6.613	-2.1235	0.527319	0.93935	0.204617	-0.055	-0.1118	1	0.862232	0.790004
ATG9A	NP_001070666.1	autophagy-related protein 9A [Homo sapiens]	1.244e-05	0	0	0	0	5.55e-06	-6.611	-1.895	0.642347	0.950217	0.258837	0.556	0.1492	1	0.805169	0.855775
GPR89B	NP_001337111.1	1 genes:GPR89B.NP_001337111.1:Golgi pH regulator B isoform 2 [Homo sapiens] ;NP_001337112.1:Golgi pH regulator B isoform 3 [Homo sapiens] ;NP_057418.1:Golgi pH regulator B isoform 1 [Homo sapiens] ;	1.618e-05	1.773e-05	0	2.819e-05	0	0	-6.586	-1.9902	0.593214	0.945956	0.235612	-16.628	-52.3568	0	0.832897	0
HBS1L	NP_001138630.1	1 genes:HBS1L.NP_001138630.1:HBS1-like protein isoform 2 [Homo sapiens] ;NP_001350615.1:HBS1-like protein isoform 4 [Homo sapiens] ;NP_006611.1:HBS1-like protein isoform 1 [Homo sapiens] ;	2.167e-05	3.96e-06	8.08e-06	0	7.42e-06	1.815e-05	-6.584	-2.0517	0.562364	0.942716	0.219807	0.253	0.2835	1	0.772226	0.884135
TGFB1	NP_000651.3	transforming growth factor beta-1 proprotein preproprotein [Homo sapiens]	0	2.606e-05	0	0	7.94e-05	1.195e-05	-6.582	-1.7998	0.692935	0.954082	0.283264	6.838	1.923	0.723727	0.276327	0.983321
CCDC80	NP_955805.1	coiled-coil domain-containing protein 80 precursor [Homo sapiens]	1.83e-05	1.07e-05	1.911e-05	0	7.52e-06	4.91e-06	-6.582	-1.7225	0.734891	0.956545	0.301438	-0.744	-1.3754	0.906238	0.96456	0.395059
TLE4	NP_001269677.1	1 genes:TLE4.NP_001269677.1:transducin-like enhancer protein 4 isoform 1 [Homo sapiens] ;NP_001269678.1:transducin-like enhancer protein 4 isoform 2 [Homo sapiens] ;NP_001269682.1:transducin-like enhancer protein 4 isoform 4 [Homo sapiens] ;NP_001338470.1:transducin-like enhancer protein 4 isoform 6 [Homo sapiens] ;NP_001338471.1:transducin-like enhancer protein 4 isoform 7 [Homo sapiens] ;NP_001…	1.296e-05	1.263e-05	1.289e-05	0	1.775e-05	8.68e-06	-6.578	-1.8294	0.677066	0.952476	0.272693	-0.021	-0.0495	1	0.849132	0.8075
MTIF2	NP_002444.2	translation initiation factor IF-2, mitochondrial isoform a precursor [Homo sapiens]	1.435e-05	6.99e-06	2.14e-05	0	2.621e-05	6.41e-06	-6.576	-1.8904	0.64476	0.950215	0.258848	0.24	0.3521	1	0.754761	0.897097
SUPT4H1	NP_003159.1	transcription elongation factor SPT4 [Homo sapiens]	0	4.344e-05	0	0	0	0	-6.561	-2.2084	0.487336	0.935177	0.187268	-7.717	-1.8786	0.622693	0.949368	0.253727
CTPS2	NP_787055.1	CTP synthase 2 [Homo sapiens]	2.577e-05	9.25e-06	1.897e-05	0	2.139e-05	8.43e-06	-6.53	-2.0722	0.552247	0.942054	0.216697	-0.095	-0.1598	1	0.86971	0.779191
KIAA0907	NP_055764.2	KH homology domain-containing protein 4 [Homo sapiens]	2.266e-05	2.483e-05	0	1.974e-05	7.76e-06	1.518e-05	-6.526	-1.8203	0.681932	0.95302	0.276183	-0.776	-1.7358	0.70038	0.955467	0.291487
MAP1S	NP_001295292.1	1 genes:MAP1S.NP_001295292.1:microtubule-associated protein 1S isoform 2 [Homo sapiens] ;NP_060644.4:microtubule-associated protein 1S isoform 1 [Homo sapiens] ;	6.73e-06	4.92e-06	1.004e-05	0	1.614e-05	2.256e-05	-6.498	-2.3961	0.405036	0.92511	0.15055	1.208	3.5289	0.121543	0.030854	0.897642
DCP1B	NP_689853.3	mRNA-decapping enzyme 1B isoform 1 [Homo sapiens]	2.255e-05	2.883e-05	0	2.357e-05	0	2.266e-05	-6.485	-2.1074	0.535082	0.940032	0.207609	-7.307	-2.7574	0.248784	0.90372	0.090827
NMT2	NP_001295224.1	glycylpeptide N-tetradecanoyltransferase 2 isoform 2 [Homo sapiens]	3.095e-05	4.567e-05	0	4.209e-05	1.57e-05	3.037e-05	-6.462	-1.3855	0.922508	0.963923	0.399777	-0.518	-1.1145	1	0.963351	0.479113
ATRN	NP_001193976.1	1 genes:ATRN.NP_001193976.1:attractin isoform 4 [Homo sapiens] ;NP_001310261.1:attractin isoform 5 precursor [Homo sapiens] ;NP_647537.1:attractin isoform 1 preproprotein [Homo sapiens] ;NP_647538.1:attractin isoform 2 preproprotein [Homo sapiens] ;	1.203e-05	4.4e-06	0	4.19e-06	1.03e-05	4.03e-06	-6.452	-1.7938	0.696166	0.954078	0.283277	-0.178	-0.2651	1	0.888205	0.749309
USP13	NP_003931.2	ubiquitin carboxyl-terminal hydrolase 13 [Homo sapiens]	1.639e-05	3.062e-05	5.409e-05	0	7.033e-05	4.688e-05	-6.451	-1.8776	0.651492	0.950793	0.262262	0.995	1.9621	0.701937	0.265944	0.981588
TTL	NP_001358641.1	1 genes:TTL.NP_001358641.1:tubulin--tyrosine ligase isoform 2 [Homo sapiens] ;NP_714923.1:tubulin--tyrosine ligase isoform 1 [Homo sapiens] ;	2.004e-05	1.465e-05	1.495e-05	0	1.373e-05	2.015e-05	-6.433	-1.6082	0.797999	0.960256	0.335455	-0.08	-0.189	1	0.876887	0.768168
ARAP1	NP_001035207.1	arf-GAP with Rho-GAP domain, ANK repeat and PH domain-containing protein 1 isoform c [Homo sapiens]	8.39e-06	2.63e-06	8.94e-06	0	2.46e-06	0	-6.42	-1.8885	0.645757	0.950214	0.258855	-6.574	-1.937	0.591959	0.94692	0.240698
DNTTIP2	NP_055412.2	deoxynucleotidyltransferase terminal-interacting protein 2 [Homo sapiens]	9.2e-06	0	0	0	6.3e-06	0	-6.418	-1.7009	0.746732	0.957457	0.308834	-1.044	-0.2706	1	0.890365	0.745479
PREP	NP_002717.3	prolyl endopeptidase [Homo sapiens]	3.429e-05	1.432e-05	1.096e-05	0	0	1.313e-05	-6.382	-1.9793	0.598758	0.946587	0.238851	-7.994	-2.7558	0.249276	0.90372	0.09083
CLASRP	NP_008987.2	CLK4-associating serine/arginine rich protein isoform 1 [Homo sapiens]	1.032e-05	0	0	0	1.414e-05	0	-6.374	-1.1889	1	0.963252	0.459121	0.367	0.0982	1	0.817555	0.843553
DDRGK1	NP_076424.1	DDRGK domain-containing protein 1 [Homo sapiens]	2.215e-05	4.856e-05	0	8.493e-05	5.31e-05	3.71e-05	-6.358	-1.8918	0.644025	0.950215	0.258843	0.296	0.6313	1	0.675264	0.942368
SHANK2	NP_036441.2	SH3 and multiple ankyrin repeat domains protein 2 isoform 1 [Homo sapiens]	3.76e-06	0	0	0	7.73e-06	0	-6.353	-1.9514	0.613047	0.947826	0.245413	0.469	0.1459	1	0.805169	0.855776
IGF2BP1	NP_006537.3	insulin-like growth factor 2 mRNA-binding protein 1 isoform 1 [Homo sapiens]	3.616e-05	1.321e-05	2.697e-05	0	4.053e-05	2.019e-05	-6.309	-1.5731	0.817558	0.960929	0.343262	0.209	0.3798	1	0.747602	0.902049
FASTKD5	NP_068598.1	FAST kinase domain-containing protein 5, mitochondrial [Homo sapiens]	1.366e-05	1.996e-05	0	3.173e-05	1.559e-05	2.745e-05	-6.282	-1.7001	0.747172	0.957457	0.308836	0.212	0.4934	1	0.714246	0.922676
PDPK1	NP_002604.1	1 genes:PDPK1.NP_002604.1:3-phosphoinositide-dependent protein kinase 1 isoform 1 [Homo sapiens] ;NP_112558.2:3-phosphoinositide-dependent protein kinase 1 isoform 2 [Homo sapiens] ;	0	1.828e-05	0	0	1.714e-05	0	-6.259	-1.769	0.709568	0.955098	0.290461	0.164	0.0393	1	0.829468	0.830847
ARID4A	NP_002883.3	AT-rich interactive domain-containing protein 4A isoform I [Homo sapiens]	0	4.04e-06	0	0	0	0	-6.255	-1.9355	0.621252	0.948434	0.248733	-7.529	-1.7659	0.683736	0.95444	0.284406
SCAPER	NP_001139395.1	1 genes:SCAPER.NP_001139395.1:S phase cyclin A-associated protein in the endoplasmic reticulum isoform b [Homo sapiens] ;NP_001339938.1:S phase cyclin A-associated protein in the endoplasmic reticulum isoform c [Homo sapiens] ;NP_001339939.1:S phase cyclin A-associated protein in the endoplasmic reticulum isoform d [Homo sapiens] ;NP_001339940.1:S phase cyclin A-associated protein in the endoplas…	0	4.4e-06	0	0	6.19e-06	6.06e-06	-6.243	-1.9206	0.628981	0.949035	0.252079	7.178	2.2498	0.549457	0.199354	0.967369
RBL2	NP_001310537.1	1 genes:RBL2.NP_001310537.1:retinoblastoma-like protein 2 isoform 1 [Homo sapiens] ;NP_001310538.1:retinoblastoma-like protein 2 isoform 2 [Homo sapiens] ;NP_001310539.1:retinoblastoma-like protein 2 isoform 3 [Homo sapiens] ;NP_001310540.1:retinoblastoma-like protein 2 isoform 4 [Homo sapiens] ;	6.11e-06	0	0	0	8.37e-06	0	-6.2	-1.4802	0.869526	0.962832	0.371102	-0.211	-0.063	1	0.851816	0.804054
WDR47	NP_001136022.1	1 genes:WDR47.NP_001136022.1:WD repeat-containing protein 47 isoform 1 [Homo sapiens] ;NP_001136023.1:WD repeat-containing protein 47 isoform 3 [Homo sapiens] ;NP_055784.3:WD repeat-containing protein 47 isoform 2 [Homo sapiens] ;	7.5e-06	1.096e-05	8.39e-06	0	7.71e-06	1.508e-05	-6.178	-1.5999	0.802619	0.96025	0.335476	0.152	0.3023	1	0.768784	0.886791
QPCTL	NP_060129.2	glutaminyl-peptide cyclotransferase-like protein isoform 1 [Homo sapiens]	2.731e-05	2.661e-05	0	2.538e-05	0	2.44e-05	-6.176	-1.4037	0.912341	0.963826	0.395629	-7.574	-2.1	0.509982	0.938338	0.201198
EXOSC8	NP_852480.1	exosome complex component RRP43 [Homo sapiens]	2.52e-05	6.445e-05	0	5.27e-05	7.768e-05	4.221e-05	-6.127	-1.9312	0.623479	0.948432	0.248745	0.365	0.5494	1	0.698877	0.93096
ZNF7	NP_001269724.1	zinc finger protein 7 isoform 1 [Homo sapiens]	0	1.337e-05	0	0	0	9.6e-07	-6.126	-1.6092	0.797443	0.960257	0.335454	-1.583	-0.4136	1	0.910197	0.705998
ZNF84	NP_001276900.1	zinc finger protein 84 [Homo sapiens]	0	4.21e-06	0	0	0	9e-07	-6.102	-1.7491	0.720376	0.95559	0.294115	0.022	0.0065	1	0.838081	0.821012
LOXL1	NP_005567.2	lysyl oxidase homolog 1 preproprotein [Homo sapiens]	1.818e-05	1.328e-05	0	8.45e-06	0	8.12e-06	-6.101	-1.854	0.663971	0.951927	0.269162	-7.582	-2.3726	0.387386	0.924134	0.148838
USP19	NP_001186090.1	1 genes:USP19.NP_001186090.1:ubiquitin carboxyl-terminal hydrolase 19 isoform 2 [Homo sapiens] ;NP_001186091.1:ubiquitin carboxyl-terminal hydrolase 19 isoform 3 [Homo sapiens] ;NP_001338027.1:ubiquitin carboxyl-terminal hydrolase 19 isoform 5 [Homo sapiens] ;NP_001338028.1:ubiquitin carboxyl-terminal hydrolase 19 isoform 6 [Homo sapiens] ;NP_001338030.1:ubiquitin carboxyl-terminal hydrolase 19 i…	1.759e-05	9.18e-06	0	7.01e-06	5.16e-06	6.73e-06	-6.06	-1.5992	0.803009	0.96025	0.335479	-0.754	-1.8198	0.654275	0.952271	0.270528
FNTA	NP_002018.1	protein farnesyltransferase/geranylgeranyltransferase type-1 subunit alpha [Homo sapiens]	3.67e-05	1.341e-05	1.369e-05	0	1.257e-05	1.23e-05	-6.05	-1.5959	0.804845	0.960604	0.339339	-0.558	-1.0026	1	0.960378	0.513744
PUM2	NP_001339846.1	1 genes:PUM2.NP_001339846.1:pumilio homolog 2 isoform 5 [Homo sapiens] ;NP_001339852.1:pumilio homolog 2 isoform 6 [Homo sapiens] ;NP_001339854.1:pumilio homolog 2 isoform 3 [Homo sapiens] ;NP_056132.1:pumilio homolog 2 isoform 1 [Homo sapiens] ;	6.52e-06	1.192e-05	0	1.364e-05	1.117e-05	8.74e-06	-6.038	-1.8276	0.678027	0.953023	0.276165	0.088	0.2224	1	0.789041	0.870353
ITGBL1	NP_001258684.1	1 genes:ITGBL1.NP_001258684.1:integrin beta-like protein 1 isoform 2 precursor [Homo sapiens] ;NP_004782.1:integrin beta-like protein 1 isoform 1 precursor [Homo sapiens] ;	1.563e-05	2.284e-05	0	3.269e-05	1.071e-05	1.571e-05	-6.029	-1.2937	0.973498	0.964103	0.429154	-0.385	-1.0386	1	0.961673	0.500737
HEATR5B	NP_061897.1	HEAT repeat-containing protein 5B [Homo sapiens]	3.36e-06	4.91e-06	3.76e-06	0	0	2.25e-06	-5.965	-1.836	0.673544	0.952477	0.272661	-7.306	-2.4442	0.358482	0.919813	0.13517
MAST4	NP_001158136.1	1 genes:MAST4.NP_001158136.1:microtubule-associated serine/threonine-protein kinase 4 isoform c [Homo sapiens] ;NP_001277155.1:microtubule-associated serine/threonine-protein kinase 4 isoform d [Homo sapiens] ;NP_001277156.1:microtubule-associated serine/threonine-protein kinase 4 isoform e [Homo sapiens] ;NP_001284580.1:microtubule-associated serine/threonine-protein kinase 4 isoform g [Homo sap…	5.3e-06	0	0	0	1.82e-06	1.78e-06	-5.931	-1.5246	0.844665	0.962113	0.359052	4.95	1.2851	1	0.464868	0.992651
RABGGTA	NP_878256.1	geranylgeranyl transferase type-2 subunit alpha [Homo sapiens]	3.067e-05	1.793e-05	0	8.55e-06	0	2.466e-05	-5.914	-1.4025	0.913013	0.963824	0.39563	-8.005	-2.4376	0.361086	0.920532	0.137364
CRYBG3	NP_705833.3	very large A-kinase anchor protein [Homo sapiens]	0	1.71e-06	0	0	0	0	-5.894	-1.8891	0.645442	0.950214	0.258853	-7.12	-2.9055	0.206249	0.896525	0.073923
GOLGA4	NP_001166184.1	1 genes:GOLGA4.NP_001166184.1:golgin subfamily A member 4 isoform 1 [Homo sapiens] ;NP_002069.2:golgin subfamily A member 4 isoform 2 [Homo sapiens] ;	1.24e-05	2.27e-06	4.62e-06	0	7.43e-06	6.23e-06	-5.887	-1.939	0.619442	0.948436	0.24873	0.302	0.387	1	0.743983	0.904479
GSDMD	NP_001159709.1	gasdermin-D [Homo sapiens]	2.156e-05	1.05e-05	0	1.503e-05	0	1.444e-05	-5.829	-1.569	0.819845	0.960928	0.343283	-8.369	-2.6699	0.276694	0.907805	0.101202
ANXA3	NP_005130.1	annexin A3 [Homo sapiens]	0.00011844	2.36e-05	4.014e-05	0	3.687e-05	5.771e-05	-5.829	-1.5063	0.854909	0.962366	0.363059	-0.089	-0.1119	1	0.862232	0.790004
ZNF827	NP_001293144.1	1 genes:ZNF827.NP_001293144.1:zinc finger protein 827 isoform 1 [Homo sapiens] ;NP_849157.2:zinc finger protein 827 isoform 2 [Homo sapiens] ;	1.287e-05	4.7e-06	0	2.018e-05	1.102e-05	4.31e-06	-5.781	-1.3941	0.917706	0.963817	0.395649	-0.237	-0.2126	1	0.87922	0.764436
CSPG4	NP_001888.2	chondroitin sulfate proteoglycan 4 precursor [Homo sapiens]	3e-06	3.28e-06	0	6.26e-06	6.16e-06	6.02e-06	-5.707	-1.6909	0.752229	0.957898	0.312569	0.664	2.3712	0.490325	0.174206	0.960528
FBXO11	NP_001177203.1	1 genes:FBXO11.NP_001177203.1:F-box only protein 11 isoform 4 [Homo sapiens] ;NP_079409.3:F-box only protein 11 isoform 1 [Homo sapiens] ;	1.501e-05	5.48e-06	1.399e-05	0	0	0	-5.656	-1.5195	0.84752	0.962109	0.359064	-16	-32.7967	0	0.836457	0
TACC2	NP_001278805.2	transforming acidic coiled-coil-containing protein 2 isoform e [Homo sapiens]	6.15e-06	2.7e-06	0	1.72e-06	2.81e-06	3.3e-06	-5.577	-1.5416	0.835154	0.961548	0.351148	-0.269	-0.5418	1	0.926734	0.664813
USP47	NP_001269588.1	1 genes:USP47.NP_001269588.1:ubiquitin carboxyl-terminal hydrolase 47 isoform a [Homo sapiens] ;NP_001317137.1:ubiquitin carboxyl-terminal hydrolase 47 isoform c [Homo sapiens] ;NP_001359021.1:ubiquitin carboxyl-terminal hydrolase 47 isoform e [Homo sapiens] ;NP_001359023.1:ubiquitin carboxyl-terminal hydrolase 47 isoform f [Homo sapiens] ;NP_001359025.1:ubiquitin carboxyl-terminal hydrolase 47 i…	5.13e-06	9.38e-06	9.57e-06	0	0	1.204e-05	-5.461	-1.3224	0.957619	0.964137	0.416518	-5.534	-1.3107	0.943551	0.965008	0.415621
SYNE1	NP_149062.1	nesprin-1 isoform 2 [Homo sapiens]	3.97e-06	5.8e-07	7.11e-06	0	1.36e-06	0	-5.433	-1.7851	0.700859	0.954596	0.286849	-5.847	-1.5931	0.78081	0.96036	0.331966
PDCD7	NP_005698.1	programmed cell death protein 7 [Homo sapiens]	1.434e-05	2.096e-05	0	1e-05	9.82e-06	2.402e-05	-5.389	-1.2837	0.979017	0.964094	0.429176	-0.123	-0.2585	1	0.888201	0.749314
PCNT	NP_001302458.1	1 genes:PCNT.NP_001302458.1:pericentrin isoform 2 [Homo sapiens] ;NP_006022.3:pericentrin isoform 1 [Homo sapiens] ;	3.32e-06	1.62e-06	0	3.86e-06	3.79e-06	2.23e-06	-5.295	-1.2398	1	0.963862	0.441963	0.257	0.4877	1	0.718043	0.920514
YAP1	NP_001269028.1	transcriptional coactivator YAP1 isoform 7 [Homo sapiens]	2.22e-05	1.352e-05	0	3.611e-05	5.07e-06	1.487e-05	-5.236	-1.4187	0.903956	0.963558	0.387422	-0.647	-0.9294	1	0.957098	0.539863
TATDN1	NP_001139632.1	1 genes:TATDN1.NP_001139632.1:putative deoxyribonuclease TATDN1 isoform b [Homo sapiens] ;NP_001304818.1:putative deoxyribonuclease TATDN1 isoform c [Homo sapiens] ;NP_114415.1:putative deoxyribonuclease TATDN1 isoform a [Homo sapiens] ;	4.173e-05	3.049e-05	3.112e-05	0	5.717e-05	5.592e-05	-4.604	-1.2755	0.983534	0.964042	0.433406	0.466	1.3147	1	0.456426	0.993177
ZNF563	NP_660319.1	zinc finger protein 563 isoform 1 [Homo sapiens]	2.338e-05	0	9.9e-07	0	1.82e-06	0	-2.954	-0.7057	1	0.940434	0.612018	-2.012	-0.5556	1	0.92821	0.660616
PHAX	NP_115553.2	phosphorylated adapter RNA export protein [Homo sapiens]	4.413e-05	0	1.316e-05	0	0	2.957e-05	-2.728	-0.5827	1	0.928754	0.65056	-0.132	-0.0284	1	0.843672	0.814311
RNF219	NP_078822.3	ORC ubiquitin ligase 1 [Homo sapiens]	0	2.8e-05	0	6.68e-06	1.312e-05	1.926e-05	-2.537	-0.666	1	0.936828	0.624953	6.284	1.9132	0.72922	0.279848	0.983877
COLGALT2	NP_001290349.1	1 genes:COLGALT2.NP_001290349.1:procollagen galactosyltransferase 2 isoform 2 precursor [Homo sapiens] ;NP_055916.1:procollagen galactosyltransferase 2 isoform 1precursor [Homo sapiens] ;	3.139e-05	0	0	2.626e-05	0	1.682e-05	-2.415	-0.604	1	0.930186	0.646308	-0.852	-0.179	1	0.874526	0.771865
DCAF7	NP_005819.3	DDB1- and CUL4-associated factor 7 [Homo sapiens]	3.051e-05	0	0	2.835e-05	0	0	-2.337	-0.5599	1	0.925807	0.658991	-8.469	-2.5415	0.321481	0.914809	0.120313
FLI1	NP_001161153.1	1 genes:FLI1.NP_001161153.1:Friend leukemia integration 1 transcription factor isoform 2 [Homo sapiens] ;NP_001257939.1:Friend leukemia integration 1 transcription factor isoform 3 [Homo sapiens] ;NP_002008.2:Friend leukemia integration 1 transcription factor isoform 1 [Homo sapiens] ;	1.66e-05	0	1.857e-05	0	0	1.112e-05	-2.322	-0.5761	1	0.927301	0.654774	0.201	0.0466	1	0.829467	0.830848
TMED10	NP_006818.3	transmembrane emp24 domain-containing protein 10 precursor [Homo sapiens]	0.00022232	0	5.921e-05	0	3.263e-05	0	-2.269	-0.5379	1	0.922733	0.667373	-0.892	-0.196	1	0.876889	0.768162
SF1	NP_001171501.1	splicing factor 1 isoform 6 [Homo sapiens]	0	0.00019886	0	5.283e-05	0	8.31e-05	-2.163	-0.465	1	0.914448	0.688081	-0.959	-0.2227	1	0.881513	0.760689
PDZD8	NP_776152.1	PDZ domain-containing protein 8 [Homo sapiens]	6.03e-06	0	4.49e-06	0	8.26e-06	0	-2.084	-0.4903	1	0.917858	0.679848	-0.087	-0.0222	1	0.843669	0.814312
MIF	NP_002406.1	macrophage migration inhibitory factor [Homo sapiens]	0.00039313	0	0.00018041	0	4.143e-05	0.00028367	-2.025	-0.5162	1	0.921135	0.671552	6.923	1.9541	0.706379	0.269405	0.982174
ATAD2	NP_054828.2	ATPase family AAA domain-containing protein 2 [Homo sapiens]	0	5.48e-06	0	1.221e-05	1.2e-05	5.03e-06	-2.004	-0.5169	1	0.921136	0.671551	6.812	1.6761	0.864726	0.346513	0.991754
FNDC3B	NP_073600.3	fibronectin type III domain-containing protein 3B [Homo sapiens]	0	1.9e-05	1.292e-05	0	2.572e-05	1.742e-05	-1.992	-0.5873	1	0.928757	0.650551	6.531	1.8704	0.753338	0.290482	0.985482
NFX1	NP_001305687.1	1 genes:NFX1.NP_001305687.1:transcriptional repressor NF-X1 isoform 4 [Homo sapiens] ;NP_002495.2:transcriptional repressor NF-X1 isoform 1 [Homo sapiens] ;	0	4.53e-06	9.25e-06	0	0	6.24e-06	-1.92	-0.361	1	0.901452	0.716364	0.306	0.0752	1	0.823571	0.83726
RNF220	NP_001306886.1	1 genes:RNF220.NP_001306886.1:E3 ubiquitin-protein ligase RNF220 isoform 2 [Homo sapiens] ;NP_001363416.1:E3 ubiquitin-protein ligase RNF220 isoform 3 [Homo sapiens] ;NP_001363417.1:E3 ubiquitin-protein ligase RNF220 isoform 2 [Homo sapiens] ;NP_001363418.1:E3 ubiquitin-protein ligase RNF220 isoform 4 [Homo sapiens] ;	0	1.44e-05	0	1.374e-05	0	1.32e-05	-1.882	-0.4544	1	0.912695	0.692171	-0.122	-0.0327	1	0.846416	0.810921
ZNF250	NP_001103159.1	zinc finger protein 250 isoform b [Homo sapiens]	0	1.145e-05	7.01e-06	0	1.288e-05	2.519e-05	-1.858	-0.4545	1	0.912696	0.692171	6.859	1.5194	0.955161	0.394204	0.994193
PSME3IP1	NP_001341027.1	1 genes:PSME3IP1.NP_001341027.1:PSME3-interacting protein isoform b [Homo sapiens] ;NP_001341032.1:PSME3-interacting protein isoform a [Homo sapiens] ;	3.726e-05	0	1.852e-05	0	3.403e-05	2.497e-05	-1.853	-0.418	1	0.909077	0.700315	6.103	1.7215	0.838515	0.334973	0.990753
ZNF717	NP_001277137.1	zinc finger protein 717 isoform a [Homo sapiens]	6.09e-06	0	5.2e-07	0	9.5e-07	0	-1.841	-0.3865	1	0.903416	0.712368	-1.23	-0.3288	1	0.898693	0.729917
ASF1B	NP_060624.1	histone chaperone ASF1B [Homo sapiens]	0	5.032e-05	0	7.201e-05	0	4.614e-05	-1.81	-0.3937	1	0.905333	0.708371	0.411	0.0943	1	0.817556	0.843552
ERCC6L	NP_060139.2	DNA excision repair protein ERCC-6-like isoform a [Homo sapiens]	1.113e-05	0	4.15e-06	0	3.81e-06	3.73e-06	-1.79	-0.4617	1	0.914446	0.688085	5.106	1.3698	1	0.439615	0.99394
MSL1	NP_001012241.1	1 genes:MSL1.NP_001012241.1:male-specific lethal 1 homolog isoform 1 [Homo sapiens] ;NP_001352848.1:male-specific lethal 1 homolog isoform 2 [Homo sapiens] ;NP_001352849.1:male-specific lethal 1 homolog isoform 3 [Homo sapiens] ;NP_001352850.1:male-specific lethal 1 homolog isoform 4 [Homo sapiens] ;	1.982e-05	0	1.478e-05	0	0	0	-1.785	-0.3983	1	0.905337	0.708366	-7.251	-2.3145	0.411875	0.927016	0.158494
RBM45	NP_001352508.1	1 genes:RBM45.NP_001352508.1:RNA-binding protein 45 isoform 2 [Homo sapiens] ;NP_694453.2:RNA-binding protein 45 isoform 1 [Homo sapiens] ;	0	2.135e-05	1.634e-05	0	3.003e-05	0	-1.782	-0.4915	1	0.917858	0.679847	-0.767	-0.1827	1	0.874528	0.771863
LGALS3BP	NP_005558.1	galectin-3-binding protein precursor [Homo sapiens]	0	2.172e-05	2.66e-05	0	2.036e-05	1.593e-05	-1.78	-0.5151	1	0.921135	0.671554	3.978	0.9271	1	0.580107	0.975007
KCTD3	NP_001306223.1	BTB/POZ domain-containing protein KCTD3 isoform 2 [Homo sapiens]	1.283e-05	0	1.576e-05	0	7.03e-06	6.69e-06	-1.757	-0.3994	1	0.905338	0.708366	6.188	1.5273	0.950622	0.390133	0.994095
CHEK1	NP_001231775.1	1 genes:CHEK1.NP_001231775.1:serine/threonine-protein kinase Chk1 isoform 2 [Homo sapiens] ;NP_001265.2:serine/threonine-protein kinase Chk1 isoform 1 [Homo sapiens] ;NP_001317356.1:serine/threonine-protein kinase Chk1 isoform 3 [Homo sapiens] ;NP_001317357.1:serine/threonine-protein kinase Chk1 isoform 4 [Homo sapiens] ;	1.574e-05	0	0	1.097e-05	0	0	-1.749	-0.4419	1	0.910908	0.696246	-7.602	-2.1082	0.506018	0.938339	0.201168
SENP2	NP_067640.2	sentrin-specific protease 2 [Homo sapiens]	2.362e-05	0	8.81e-06	0	8.09e-06	0	-1.724	-0.4032	1	0.907221	0.704356	-1.012	-0.2418	1	0.886004	0.753133
PFDN5	NP_002615.2	prefoldin subunit 5 isoform alpha [Homo sapiens]	0.0001355	0	5.052e-05	0	3.094e-05	0	-1.717	-0.5172	1	0.921136	0.671551	-0.617	-0.1469	1	0.867251	0.78282
	NP_001337414.1	adenylyl cyclase-associated protein 1 isoform b [Homo sapiens]	0.00038397	0	0.0001769	0	0	7.508e-05	-1.713	-0.4244	1	0.909081	0.700306	-1.495	-0.4228	1	0.911993	0.701951
TTK	NP_001160163.1	1 genes:TTK.NP_001160163.1:dual specificity protein kinase TTK isoform 2 [Homo sapiens] ;NP_003309.2:dual specificity protein kinase TTK isoform 1 [Homo sapiens] ;	0	1.187e-05	6.06e-06	0	0	1.905e-05	-1.706	-0.4485	1	0.91269	0.692177	-0.125	-0.0275	1	0.843671	0.814311
NPAT	NP_001308236.1	1 genes:NPAT.NP_001308236.1:protein NPAT isoform 1 [Homo sapiens] ;NP_002510.2:protein NPAT isoform 2 [Homo sapiens] ;	0	3.54e-06	0	3.38e-06	6.64e-06	3.25e-06	-1.685	-0.2575	1	0.88459	0.74747	6.746	2.0539	0.651653	0.245847	0.977857
TXLNG	NP_001162154.1	1 genes:TXLNG.NP_001162154.1:gamma-taxilin isoform 2 [Homo sapiens] ;NP_060830.2:gamma-taxilin isoform 1 [Homo sapiens] ;	0	5.775e-05	5.239e-05	0	6.015e-05	4.707e-05	-1.684	-0.4217	1	0.909079	0.700309	7.878	2.013	0.673894	0.255807	0.979761
KIAA1524	NP_065941.2	protein CIP2A [Homo sapiens]	3.458e-05	0	1.433e-05	0	5.26e-06	0	-1.666	-0.3217	1	0.89538	0.728188	-2.894	-0.7045	1	0.942368	0.61375
CAND2	NP_001155971.1	cullin-associated NEDD8-dissociated protein 2 isoform 1 [Homo sapiens]	5.73e-06	0	2.12e-06	0	3.96e-06	3.81e-06	-1.665	-0.3722	1	0.901458	0.716351	5.092	1.2103	1	0.490394	0.990467
CDKN2AIP	NP_060102.1	CDKN2A-interacting protein isoform 1 [Homo sapiens]	0	8.76e-06	1.341e-05	0	3.286e-05	0	-1.656	-0.4255	1	0.909082	0.700305	-0.028	-0.0076	1	0.840891	0.817676
PATL1	NP_689929.2	protein PAT1 homolog 1 [Homo sapiens]	2.258e-05	0	2.021e-05	0	1.547e-05	0	-1.645	-0.3763	1	0.903409	0.712378	-2.184	-0.6403	1	0.937649	0.630944
PTMA	NP_001092755.1	1 genes:PTMA.NP_001092755.1:prothymosin alpha isoform 1 [Homo sapiens] ;NP_002814.3:prothymosin alpha isoform 2 [Homo sapiens] ;	0.00021931	0.00025182	4.673e-05	4.368e-05	0.00017168	0.00014695	-1.634	-5.253	0.004037	0.843218	0.000437	-0.401	-1.1364	1	0.96385	0.470531
PRIMPOL	NP_001287696.1	1 genes:PRIMPOL.NP_001287696.1:DNA-directed primase/polymerase protein isoform 2 [Homo sapiens] ;NP_001332820.1:DNA-directed primase/polymerase protein isoform 4 [Homo sapiens] ;NP_001332821.1:DNA-directed primase/polymerase protein isoform 5 [Homo sapiens] ;NP_001332824.1:DNA-directed primase/polymerase protein isoform 1 [Homo sapiens] ;NP_001332825.1:DNA-directed primase/polymerase protein isof…	1.614e-05	0	2.407e-05	0	1.105e-05	4.325e-05	-1.62	-0.4411	1	0.910907	0.696247	7.35	2.0615	0.647552	0.242567	0.977209
AGAP3	NP_001268229.1	1 genes:AGAP3.NP_001268229.1:arf-GAP with GTPase, ANK repeat and PH domain-containing protein 3 isoform c [Homo sapiens] ;NP_001337031.1:arf-GAP with GTPase, ANK repeat and PH domain-containing protein 3 isoform f [Homo sapiens] ;NP_001337032.1:arf-GAP with GTPase, ANK repeat and PH domain-containing protein 3 isoform g [Homo sapiens] ;NP_001337033.1:arf-GAP with GTPase, ANK repeat and PH domain-…	0	8.76e-06	0	8.36e-06	0	8.03e-06	-1.617	-0.41	1	0.907225	0.704347	0.013	0.0034	1	0.838082	0.821011
CTDSPL2	NP_057480.2	CTD small phosphatase-like protein 2 [Homo sapiens]	0	1.636e-05	0	2.601e-05	2.045e-05	2e-05	-1.614	-0.3227	1	0.895381	0.728187	7.967	1.9072	0.732588	0.28339	0.984419
MTFMT	NP_640335.2	methionyl-tRNA formyltransferase, mitochondrial [Homo sapiens]	0	2.613e-05	0	2.493e-05	0	1.198e-05	-1.6	-0.3418	1	0.897441	0.724259	-0.682	-0.1517	1	0.869706	0.779196
EIF3J	NP_001271264.1	1 genes:EIF3J.NP_001271264.1:eukaryotic translation initiation factor 3 subunit J isoform 2 [Homo sapiens] ;NP_003749.2:eukaryotic translation initiation factor 3 subunit J isoform 1 [Homo sapiens] ;	0	4.983e-05	5.085e-05	0	0	2.284e-05	-1.582	-0.3179	1	0.893295	0.732081	-0.766	-0.1831	1	0.874528	0.771862
ZNF362	NP_001357141.1	zinc finger protein 362 [Homo sapiens]	0	1.694e-05	0	6.93e-06	0	0	-1.569	-0.431	1	0.9109	0.696258	-7.729	-2.6616	0.27945	0.908495	0.10299
FN1	NP_001293058.1	1 genes:FN1. 5 proteins in this group did not match any genes. NP_001293058.1:fibronectin isoform 8 precursor [Homo sapiens] ;NP_001293060.1:fibronectin isoform 10 precursor [Homo sapiens] ;NP_001352446.1:fibronectin isoform 12 precursor [Homo sapiens] ;NP_001352447.1:fibronectin isoform 13 precursor [Homo sapiens] ;NP_001352450.1:fibronectin isoform 16 precursor [Homo sapiens] ;NP_002017.1:fibro…	0.00019763	5.402e-05	2.333e-05	1.784e-05	2.142e-05	1.238e-05	-1.55	-1.3259	0.955679	0.964138	0.416502	-1.794	-2.627	0.291148	0.91058	0.108539
MYPN	NP_001243196.1	myopalladin isoform a [Homo sapiens]	0	3.85e-06	0	3.67e-06	9.02e-06	0	-1.534	-0.4423	1	0.910908	0.696246	-0.43	-0.135	1	0.864761	0.786423
POLDIP3	NP_001265586.1	1 genes:POLDIP3.NP_001265586.1:polymerase delta-interacting protein 3 isoform 3 [Homo sapiens] ;NP_115687.2:polymerase delta-interacting protein 3 isoform 1 [Homo sapiens] ;	0.00026202	0.00018565	4.737e-05	4.981e-05	3.263e-05	3.724e-05	-1.53	-4.3938	0.022901	0.85241	0.00484	-1.836	-5.4482	0.001932	0.841753	0.000209
REEP4	NP_079508.2	receptor expression-enhancing protein 4 isoform 1 precursor [Homo sapiens]	0	2.966e-05	0	1.887e-05	1.854e-05	1.813e-05	-1.527	-0.3818	1	0.903411	0.712371	6.316	2.0472	0.655278	0.245836	0.977861
AK1	NP_001305050.1	1 genes:AK1.NP_001305050.1:adenylate kinase isoenzyme 1 isoform 1 [Homo sapiens] ;NP_001305051.1:adenylate kinase isoenzyme 1 isoform 2 [Homo sapiens] ;	0.00010756	0	5.347e-05	0	6.139e-05	0	-1.523	-0.3996	1	0.905338	0.708366	-0.623	-0.1597	1	0.86971	0.779191
RPL7L1	NP_001353410.1	60S ribosomal protein L7-like 1 [Homo sapiens]	0.00040914	0.00033881	0.0001017	6.655e-05	0.0001588	4.569e-05	-1.501	-4.2172	0.031532	0.855569	0.007332	-1.444	-2.4564	0.353698	0.919813	0.135137
PCYT1A	NP_005008.2	choline-phosphate cytidylyltransferase A [Homo sapiens]	4.738e-05	0	2.12e-05	0	4.543e-05	1.27e-05	-1.485	-0.3308	1	0.895386	0.72818	7.489	1.6764	0.864552	0.346514	0.991753
CASK	NP_001119526.1	1 genes:CASK.NP_001119526.1:peripheral plasma membrane protein CASK isoform 2 [Homo sapiens] ;NP_001119527.1:peripheral plasma membrane protein CASK isoform 3 [Homo sapiens] ;NP_001354650.1:peripheral plasma membrane protein CASK isoform 4 [Homo sapiens] ;NP_003679.2:peripheral plasma membrane protein CASK isoform 1 [Homo sapiens] ;	6.196e-05	5.094e-05	1.155e-05	1.35e-05	4.509e-05	3.633e-05	-1.479	-5.1596	0.004947	0.843857	0.00059	-0.348	-1.02	1	0.960839	0.509389
CLSPN	NP_001317419.1	1 genes:CLSPN.NP_001317419.1:claspin isoform 3 [Homo sapiens] ;NP_071394.2:claspin isoform 1 [Homo sapiens] ;	5.22e-06	0	3.89e-06	0	0	3.5e-06	-1.479	-0.4818	1	0.916173	0.683969	-0.306	-0.0682	1	0.851819	0.804053
INO80B	NP_112578.2	INO80 complex subunit B [Homo sapiens]	0	3.569e-05	0	1.362e-05	1.338e-05	0	-1.468	-0.3318	1	0.895387	0.72818	-0.279	-0.0752	1	0.854468	0.800581
PTGIS	NP_000952.1	prostacyclin synthase precursor [Homo sapiens]	1.391e-05	0	0	9.7e-06	9.53e-06	9.32e-06	-1.465	-0.4035	1	0.907221	0.704356	6.493	1.7646	0.813706	0.319807	0.98922
ATP5C1	NP_001001973.1	1 genes:ATP5F1C.NP_001001973.1:ATP synthase subunit gamma, mitochondrial isoform L (liver) precursor [Homo sapiens] ;NP_001307815.1:ATP synthase subunit gamma, mitochondrial isoform 3 [Homo sapiens] ;NP_005165.1:ATP synthase subunit gamma, mitochondrial isoform H (heart) precursor [Homo sapiens] ;	0	0.00012791	0	9.762e-05	1.599e-05	5.473e-05	-1.454	-0.3184	1	0.893296	0.732081	5.012	1.3475	1	0.448016	0.993601
ARFGAP2	NP_115765.2	ADP-ribosylation factor GTPase-activating protein 2 isoform 1 [Homo sapiens]	7.009e-05	3.325e-05	7.47e-06	1.551e-05	3.741e-05	2.385e-05	-1.452	-2.6225	0.317771	0.913526	0.114885	-0.49	-1.092	1	0.963058	0.483446
PPP1R8	NP_054829.2	nuclear inhibitor of protein phosphatase 1 isoform alpha [Homo sapiens]	0.00023779	0.00015927	7.389e-05	2.763e-05	7.465e-05	0.00010622	-1.44	-2.7251	0.282687	0.907868	0.09952	-0.775	-2.0759	0.521723	0.939707	0.206988
RPP14	NP_001092253.1	ribonuclease P protein subunit p14 [Homo sapiens]	5.609e-05	0	4.183e-05	0	5.763e-05	0	-1.401	-0.3334	1	0.897438	0.724269	-0.246	-0.059	1	0.851815	0.804056
CTSK	NP_000387.1	cathepsin K preproprotein [Homo sapiens]	2.114e-05	0	1.577e-05	0	1.448e-05	0	-1.377	-0.4074	1	0.907223	0.704349	1.773	0.3693	1	0.747595	0.902053
GBF1	NP_001186307.1	Golgi-specific brefeldin A-resistance guanine nucleotide exchange factor 1 isoform 2 [Homo sapiens]	0.00012929	9.31e-05	0.00011178	9.14e-06	7.059e-05	9.416e-05	-1.373	-0.9513	1	0.95636	0.533319	-0.338	-0.9604	1	0.958851	0.526807
EDIL3	NP_001265571.1	1 genes:EDIL3.NP_001265571.1:EGF-like repeat and discoidin I-like domain-containing protein 3 isoform 2 precursor [Homo sapiens] ;NP_005702.3:EGF-like repeat and discoidin I-like domain-containing protein 3 isoform 1 precursor [Homo sapiens] ;	0	3.244e-05	0	1.032e-05	0	0	-1.373	-0.3873	1	0.903417	0.712368	-9.13	-2.4188	0.368573	0.921251	0.139629
LRSAM1	NP_001005373.1	1 genes:LRSAM1.NP_001005373.1:E3 ubiquitin-protein ligase LRSAM1 isoform 1 [Homo sapiens] ;NP_001177652.1:E3 ubiquitin-protein ligase LRSAM1 isoform 2 [Homo sapiens] ;	9.62e-06	0	7.17e-06	0	0	0	-1.365	-0.3511	1	0.899462	0.720321	-7.733	-2.0661	0.526537	0.940387	0.209915
PRDM15	NP_001035514.1	1 genes:PRDM15. 4 proteins in this group did not match any genes. NP_001035514.1:PR domain zinc finger protein 15 isoform 2 [Homo sapiens] ;NP_001035514.2:PR domain zinc finger protein 15 isoform 2 [Homo sapiens] ;NP_001269863.1:PR domain zinc finger protein 15 isoform 3 [Homo sapiens] ;NP_001269863.2:PR domain zinc finger protein 15 isoform 3 [Homo sapiens] ;NP_071398.3:PR domain zinc finger pro…	5.9e-06	0	0	6.17e-06	0	3.96e-06	-1.36	-0.3502	1	0.899462	0.720322	0.705	0.161	1	0.802	0.858754
STC2	NP_003705.1	stanniocalcin-2 precursor [Homo sapiens]	0.00018425	0.00010939	3.435e-05	4.014e-05	0	3.086e-05	-1.339	-3.7529	0.06882	0.866311	0.018877	-7.257	-1.8944	0.614313	0.948766	0.250428
DDX52	NP_008941.3	probable ATP-dependent RNA helicase DDX52 isoform 1 [Homo sapiens]	8.128e-05	0.00013151	1.732e-05	4.047e-05	4.772e-05	0	-1.337	-2.4934	0.365882	0.92002	0.13413	-6.677	-1.8992	0.611776	0.948769	0.250422
UCKL1	NP_001180308.1	1 genes:UCKL1.NP_001180308.1:uridine-cytidine kinase-like 1 isoform 2 [Homo sapiens] ;NP_001340406.1:uridine-cytidine kinase-like 1 isoform 5 [Homo sapiens] ;NP_001340408.1:uridine-cytidine kinase-like 1 isoform 7 [Homo sapiens] ;NP_060329.2:uridine-cytidine kinase-like 1 isoform 1 [Homo sapiens] ;	0	9.54e-06	0	9.1e-06	8.94e-06	1.312e-05	-1.313	-0.3608	1	0.901452	0.716364	7.191	1.6975	0.852363	0.338775	0.991108
COG5	NP_001154992.1	1 genes:COG5. 3 proteins in this group did not match any genes. NP_001154992.1:conserved oligomeric Golgi complex subunit 5 isoform 3 [Homo sapiens] ;NP_001154992.2:conserved oligomeric Golgi complex subunit 5 isoform 3 [Homo sapiens] ;NP_006339.3:conserved oligomeric Golgi complex subunit 5 isoform 1 [Homo sapiens] ;NP_006339.4:conserved oligomeric Golgi complex subunit 5 isoform 1 [Homo sapiens…	1.268e-05	0	9.45e-06	0	2.026e-05	5.66e-06	-1.309	-0.3761	1	0.903409	0.712379	7.524	2.3927	0.480225	0.168895	0.958974
BRMS1L	NP_115728.2	breast cancer metastasis-suppressor 1-like protein [Homo sapiens]	0	3.147e-05	0	1.501e-05	0	2.164e-05	-1.294	-0.3538	1	0.899464	0.720317	-0.098	-0.0291	1	0.846416	0.810923
DENND4B	NP_001354395.1	1 genes:DENND4B.NP_001354395.1:DENN domain-containing protein 4B isoform 2 [Homo sapiens] ;NP_055671.2:DENN domain-containing protein 4B isoform 1 [Homo sapiens] ;	6.92e-06	0	0	3.22e-06	0	3.09e-06	-1.292	-0.3554	1	0.899465	0.720316	-1.077	-0.2498	1	0.886007	0.753125
ZNF16	NP_001025147.2	zinc finger protein 16 [Homo sapiens]	0	1.973e-05	8.87e-06	0	1.863e-05	0	-1.283	-0.2425	1	0.88233	0.75126	-0.624	-0.1237	1	0.864755	0.786428
PCCB	NP_000523.2	1 genes:PCCB.NP_000523.2:propionyl-CoA carboxylase beta chain, mitochondrial isoform 1 precursor [Homo sapiens] ;NP_001171485.1:propionyl-CoA carboxylase beta chain, mitochondrial isoform 2 precursor [Homo sapiens] ;	0	9.43e-06	0	1.799e-05	1.326e-05	2.162e-05	-1.28	-0.2894	1	0.889011	0.739819	6.149	1.7654	0.813247	0.319811	0.98922
HNRNPA0	NP_006796.1	heterogeneous nuclear ribonucleoprotein A0 [Homo sapiens]	0.00052451	0.00064153	0.00015305	0.00017486	0.0002343	0.00014516	-1.271	-3.5909	0.088509	0.871319	0.025687	-1.151	-2.5874	0.304944	0.912686	0.114311
SEMA3C	NP_001337049.1	1 genes:SEMA3C.NP_001337049.1:semaphorin-3C isoform 1 [Homo sapiens] ;NP_006370.1:semaphorin-3C isoform 2 precursor [Homo sapiens] ;	4.522e-05	5.948e-05	1.012e-05	2.207e-05	3.098e-05	3.03e-05	-1.253	-2.5447	0.346237	0.917121	0.125339	-0.516	-1.633	0.758103	0.959166	0.320672
MOV10	NP_001273001.1	1 genes:MOV10.NP_001273001.1:helicase MOV-10 isoform 2 [Homo sapiens] ;NP_066014.1:helicase MOV-10 isoform 1 [Homo sapiens] ;	5.876e-05	2.952e-05	5.48e-06	2.304e-05	0	3.199e-05	-1.251	-1.4609	0.880335	0.963037	0.375172	-8.869	-1.967	0.576436	0.945013	0.231231
MAP1A	NP_002364.5	microtubule-associated protein 1A [Homo sapiens]	1.398e-05	3.68e-06	9.6e-07	3.73e-06	5.24e-06	2.513e-05	-1.248	-1.4045	0.911895	0.963696	0.391538	0.543	0.619	1	0.679243	0.94055
DSCR3	NP_006043.1	vacuolar protein sorting-associated protein 26C isoform 1 [Homo sapiens]	0	1.711e-05	2.62e-05	0	1.604e-05	0	-1.247	-0.2458	1	0.882331	0.751258	-2.032	-0.455	1	0.917195	0.689718
AIDA	NP_073742.2	axin interactor, dorsalization-associated protein [Homo sapiens]	2.273e-05	0	1.695e-05	0	0	2.284e-05	-1.246	-0.3265	1	0.895382	0.728182	-0.307	-0.0759	1	0.854468	0.800581
TIA1	NP_001338437.1	nucleolysin TIA-1 isoform p40 isoform 3 [Homo sapiens]	0.00010037	8.94e-05	3.031e-05	2.519e-05	2.166e-05	3.268e-05	-1.242	-3.5332	0.096557	0.873129	0.02836	-1.288	-3.2315	0.132024	0.881906	0.044464
ATP2B1	NP_001353450.1	plasma membrane calcium-transporting ATPase 1 isoform 1b [Homo sapiens]	0	4.17e-06	0	3.97e-06	7.81e-06	8.02e-06	-1.241	-0.3358	1	0.897438	0.724265	6.815	1.8076	0.789063	0.30867	0.987915
PSMD10	NP_002805.1	26S proteasome non-ATPase regulatory subunit 10 isoform 1 [Homo sapiens]	0.00016927	5.622e-05	3.443e-05	2.145e-05	2.108e-05	0.00015465	-1.239	-2.3973	0.404538	0.92511	0.150545	-0.501	-0.4994	1	0.92211	0.677326
STK4	NP_001339314.1	1 genes:STK4.NP_001339314.1:serine/threonine-protein kinase 4 isoform 2 [Homo sapiens] ;NP_006273.1:serine/threonine-protein kinase 4 isoform 1 [Homo sapiens] ;	1.506e-05	0	1.123e-05	0	1.031e-05	1.513e-05	-1.239	-0.2992	1	0.891166	0.735963	7.24	2.1193	0.616695	0.229728	0.974525
ALDOC	NP_005156.1	fructose-bisphosphate aldolase C [Homo sapiens]	0.00011703	5.646e-05	1.454e-05	3.378e-05	6.69e-06	8.396e-05	-1.235	-2.0568	0.559839	0.942718	0.219788	-1.269	-0.9985	1	0.960376	0.51376
TRAPPC10	NP_003265.3	trafficking protein particle complex subunit 10 isoform a [Homo sapiens]	8.29e-06	0	4.12e-06	0	3.78e-06	1.11e-05	-1.227	-0.3911	1	0.905332	0.708374	6.051	1.8895	0.74255	0.286933	0.984957
DIP2C	NP_055789.1	disco-interacting protein 2 homolog C [Homo sapiens]	4.47e-06	0	3.33e-06	0	0	0	-1.225	-0.3724	1	0.901458	0.716351	-7.231	-1.9189	0.601413	0.94754	0.243927
KANK1	NP_001243806.1	KN motif and ankyrin repeat domain-containing protein 1 isoform L [Homo sapiens]	5.14e-06	0	2e-06	0	5.29e-06	0	-1.222	-0.3685	1	0.901455	0.716353	-0.694	-0.1896	1	0.876887	0.768167
OS9	NP_001017958.1	protein OS-9 isoform 4 precursor [Homo sapiens]	5.33e-06	0	0	3.72e-06	1.583e-05	0	-1.221	-0.3283	1	0.895384	0.728181	-0.259	-0.0611	1	0.851816	0.804055
NSA2	NP_055701.1	ribosome biogenesis protein NSA2 homolog isoform 1 [Homo sapiens]	0.00012038	4.887e-05	2.992e-05	1.865e-05	1.832e-05	1.792e-05	-1.216	-1.7534	0.718037	0.955591	0.294096	-1.449	-3.1777	0.14256	0.884069	0.048424
NOM1	NP_001340295.1	1 genes:NOM1.NP_001340295.1:nucleolar MIF4G domain-containing protein 1 isoform 2 [Homo sapiens] ;NP_612409.1:nucleolar MIF4G domain-containing protein 1 isoform 1 [Homo sapiens] ;	0	2.066e-05	6.02e-06	0	0	1.083e-05	-1.186	-0.2755	1	0.886818	0.743655	-1.838	-0.4591	1	0.917197	0.68971
NIFK	NP_115766.3	MKI67 FHA domain-interacting nucleolar phosphoprotein [Homo sapiens]	0.00013056	0.00022549	3.54e-05	7.446e-05	9.756e-05	6.362e-05	-1.185	-1.5504	0.830236	0.961552	0.351114	-0.797	-1.8609	0.632135	0.949962	0.257064
CPEB4	NP_001295118.1	1 genes:CPEB4.NP_001295118.1:cytoplasmic polyadenylation element-binding protein 4 isoform b [Homo sapiens] ;NP_001295120.1:cytoplasmic polyadenylation element-binding protein 4 isoform c [Homo sapiens] ;NP_085130.2:cytoplasmic polyadenylation element-binding protein 4 isoform a [Homo sapiens] ;	5.373e-05	0	1.457e-05	0	1.673e-05	0	-1.185	-0.3746	1	0.903409	0.712381	-1.121	-0.2179	1	0.881511	0.760693
SCLT1	NP_653244.2	sodium channel and clathrin linker 1 isoform 1 [Homo sapiens]	1.011e-05	0	7.54e-06	0	0	6.77e-06	-1.183	-0.2816	1	0.889006	0.739825	-0.054	-0.0132	1	0.840892	0.817675
TP53BP1	NP_001135451.1	TP53-binding protein 1 isoform 2 [Homo sapiens]	7.22e-05	0.00011966	8.929e-05	9.82e-06	0.00011096	8.259e-05	-1.18	-1.0381	1	0.959632	0.506977	0.05	0.1222	1	0.811421	0.849725
ZMAT2	NP_653324.1	zinc finger matrin-type protein 2 [Homo sapiens]	0	8.939e-05	0	2.436e-05	0	4.684e-05	-1.168	-0.31	1	0.89329	0.732086	-0.827	-0.1627	1	0.872132	0.775545
MYL6	NP_524147.2	myosin light polypeptide 6 isoform 2 [Homo sapiens]	0.00017709	0.00032355	2.336e-05	0.00017379	0.0006066	0.0003012	-1.167	-1.1861	1	0.963251	0.459132	0.548	1.0184	1	0.554567	0.980731
GSTM3	NP_000840.2	glutathione S-transferase Mu 3 [Homo sapiens]	0.00013911	0	5.763e-05	0	2.117e-05	3.107e-05	-1.166	-0.2971	1	0.891165	0.735965	7.469	2.4291	0.463392	0.161123	0.956625
TAF5L	NP_001020418.1	1 genes:TAF5L.NP_001020418.1:TAF5-like RNA polymerase II p300/CBP-associated factor-associated factor 65 kDa subunit 5L isoform b [Homo sapiens] ;NP_055224.1:TAF5-like RNA polymerase II p300/CBP-associated factor-associated factor 65 kDa subunit 5L isoform a [Homo sapiens] ;	0	1.564e-05	1.596e-05	0	2.932e-05	0	-1.164	-0.3244	1	0.895381	0.728185	-0.728	-0.2056	1	0.879216	0.76444
RBMS3	NP_001003792.1	RNA-binding motif, single-stranded-interacting protein 3 isoform 3 [Homo sapiens]	7.47e-05	4.245e-05	2.476e-05	1.157e-05	1.137e-05	3.337e-05	-1.157	-2.4805	0.370931	0.920746	0.136394	-1.097	-1.4668	0.853409	0.963203	0.366913
MEGF8	NP_001258867.1	1 genes:MEGF8.NP_001258867.1:multiple epidermal growth factor-like domains protein 8 isoform 1 precursor [Homo sapiens] ;NP_001401.2:multiple epidermal growth factor-like domains protein 8 isoform 2 precursor [Homo sapiens] ;	0	1.79e-06	0	2.56e-06	0	3.28e-06	-1.156	-0.289	1	0.88901	0.739819	-1.161	-0.3195	1	0.896665	0.733835
MMP24OS	NP_001341932.1	protein MMP24OS [Homo sapiens]	0	7.158e-05	0	0.00013658	0	0.00013127	-1.152	-0.3043	1	0.89117	0.735961	-0.969	-0.1793	1	0.874527	0.771865
CUEDC2	NP_076945.2	CUE domain-containing protein 2 [Homo sapiens]	3.635e-05	0	0	2.534e-05	0	4.059e-05	-1.152	-0.2719	1	0.886816	0.743656	0.392	0.1015	1	0.817555	0.843553
TMEM131	NP_056163.1	transmembrane protein 131 [Homo sapiens]	0	2.7e-06	0	2.57e-06	0	3.71e-06	-1.151	-0.2573	1	0.884589	0.74747	0.087	0.0185	1	0.835241	0.824319
VPS54	NP_001005739.1	1 genes:VPS54.NP_001005739.1:vacuolar protein sorting-associated protein 54 isoform 2 [Homo sapiens] ;NP_057600.2:vacuolar protein sorting-associated protein 54 isoform 1 [Homo sapiens] ;	3.964e-05	0	8.06e-06	0	0	0	-1.145	-0.2735	1	0.886817	0.743655	-7.2	-2.3388	0.401521	0.925575	0.153633
ANKRD11	NP_001243112.1	ankyrin repeat domain-containing protein 11 [Homo sapiens]	0	3.82e-06	0	1.82e-06	0	0	-1.14	-0.3152	1	0.893293	0.732082	-7.401	-2.384	0.382689	0.923413	0.146496
ANKRD52	NP_775866.2	serine/threonine-protein phosphatase 6 regulatory ankyrin repeat subunit C [Homo sapiens]	3.232e-05	1.417e-05	4.82e-06	9.01e-06	0	1.299e-05	-1.139	-2.0569	0.559789	0.942718	0.219788	-7.146	-2.4854	0.342492	0.917661	0.128655
MTCL1	NP_056025.2	microtubule cross-linking factor 1 [Homo sapiens]	2.193e-05	1.602e-05	4.91e-06	7.64e-06	2.553e-05	3.232e-05	-1.132	-2.9472	0.216173	0.897083	0.073322	0.419	1.1565	1	0.507481	0.988489
DPYD	NP_000101.2	dihydropyrimidine dehydrogenase [NADP(+)] isoform 1 [Homo sapiens]	2.714e-05	0	5.06e-06	0	4.65e-06	0	-1.132	-0.2595	1	0.884591	0.747468	-1.398	-0.3331	1	0.898697	0.729915
MRM1	NP_079140.2	rRNA methyltransferase 1, mitochondrial precursor [Homo sapiens]	5.911e-05	0	0	1.374e-05	0	1.32e-05	-1.126	-0.2932	1	0.891164	0.73597	-3.632	-0.8145	1	0.951193	0.574759
SLC3A2	NP_001012680.1	1 genes:SLC3A2.NP_001012680.1:4F2 cell-surface antigen heavy chain isoform b [Homo sapiens] ;NP_001012682.1:4F2 cell-surface antigen heavy chain isoform e [Homo sapiens] ;NP_001013269.1:4F2 cell-surface antigen heavy chain isoform f [Homo sapiens] ;NP_002385.3:4F2 cell-surface antigen heavy chain isoform c [Homo sapiens] ;	0	8.05e-06	0	7.68e-06	1.51e-05	1.108e-05	-1.125	-0.2246	1	0.880036	0.755031	6.676	1.9063	0.733094	0.283389	0.984419
GOLGA3	NP_005886.2	golgin subfamily A member 3 isoform 1 [Homo sapiens]	1.857e-05	1.187e-05	5.19e-06	4.85e-06	1.431e-05	6.22e-06	-1.099	-3.0459	0.190622	0.892645	0.063647	-0.486	-0.9967	1	0.959903	0.51808
AHDC1	NP_001358857.1	AT-hook DNA-binding motif-containing protein 1 [Homo sapiens]	5.207e-05	2.061e-05	8.09e-06	1.361e-05	1.04e-05	1.308e-05	-1.088	-2.1779	0.501512	0.936581	0.192951	-1.02	-1.9443	0.588165	0.946289	0.237522
BLVRB	NP_000704.1	flavin reductase (NADPH) [Homo sapiens]	0.00016882	0.00011102	6.295e-05	3.53e-05	0.00010407	0.00013574	-1.086	-1.7609	0.713961	0.955096	0.290496	-0.108	-0.2645	1	0.888205	0.749309
PRPSAP1	NP_002757.2	phosphoribosyl pyrophosphate synthase-associated protein 1 isoform 1 [Homo sapiens]	0.00018969	3.96e-05	6.736e-05	1.259e-05	1.237e-05	7.868e-05	-1.082	-1.0876	1	0.960924	0.493842	-1.022	-0.9508	1	0.958293	0.531152
HEATR6	NP_071353.4	HEAT repeat-containing protein 6 [Homo sapiens]	0	4.3e-06	0	4.11e-06	4.03e-06	3.95e-06	-1.076	-0.2562	1	0.884589	0.747471	5.738	1.5821	0.91905	0.374056	0.993495
PRR12	NP_065770.1	proline-rich protein 12 [Homo sapiens]	0	2.5e-06	6.37e-06	0	2.34e-06	2.29e-06	-1.071	-0.2713	1	0.886815	0.743657	6.947	1.9453	0.711275	0.272874	0.98275
RBM22	NP_060517.1	pre-mRNA-splicing factor RBM22 [Homo sapiens]	7.452e-05	2.42e-05	1.235e-05	1.732e-05	1.134e-05	3.329e-05	-1.066	-1.5748	0.81661	0.960929	0.343256	-0.859	-0.8302	1	0.95203	0.570397
PTPN23	NP_056281.1	tyrosine-protein phosphatase non-receptor type 23 isoform 1 [Homo sapiens]	2.551e-05	0	0	2.96e-06	2.91e-06	2.85e-06	-1.063	-0.3141	1	0.893292	0.732083	4.628	1.4203	1	0.422934	0.994337
TOM1L1	NP_001308102.1	1 genes:TOM1L1.NP_001308102.1:TOM1-like protein 1 isoform 2 [Homo sapiens] ;NP_005477.2:TOM1-like protein 1 isoform 1 [Homo sapiens] ;	6.031e-05	0	2.998e-05	0	0	2.694e-05	-1.058	-0.298	1	0.891166	0.735964	-0.418	-0.0948	1	0.857092	0.797079
FILIP1L	NP_001035924.1	1 genes:FILIP1L.NP_001035924.1:filamin A-interacting protein 1-like isoform 3 [Homo sapiens] ;NP_001269722.1:filamin A-interacting protein 1-like isoform 4 [Homo sapiens] ;NP_001269723.1:filamin A-interacting protein 1-like isoform 5 [Homo sapiens] ;NP_001357176.1:filamin A-interacting protein 1-like isofom 2 [Homo sapiens] ;NP_878913.2:filamin A-interacting protein 1-like isoform 1 [Homo sapiens…	1.842e-05	1.794e-05	4.58e-06	8.56e-06	1.472e-05	1.234e-05	-1.051	-2.4277	0.39205	0.923656	0.145716	-0.273	-0.8806	1	0.955087	0.552968
TAOK1	NP_065842.1	serine/threonine-protein kinase TAO1 isoform 1 [Homo sapiens]	3.127e-05	2.343e-05	3.63e-06	2.034e-05	0	1.676e-05	-1.051	-1.3447	0.945239	0.964116	0.41229	-7.235	-1.7233	0.707329	0.955967	0.295058
FIZ1	NP_116225.2	flt3-interacting zinc finger protein 1 [Homo sapiens]	3.739e-05	5.636e-05	1.046e-05	2.444e-05	4.8e-06	2.349e-05	-1.05	-2.2971	0.447363	0.930181	0.168276	-1.459	-1.918	0.601885	0.94754	0.24393
ATG2B	NP_060506.6	autophagy-related protein 2 homolog B [Homo sapiens]	5.02e-06	0	4.99e-06	0	0	3.36e-06	-1.048	-0.2141	1	0.87771	0.75877	-0.823	-0.18	1	0.874527	0.771864
XPC	NP_001341658.1	1 genes:XPC.NP_001341658.1:DNA repair protein complementing XP-C cells isoform 5 [Homo sapiens] ;NP_004619.3:DNA repair protein complementing XP-C cells [Homo sapiens] ;	5.213e-05	3.265e-05	1.111e-05	1.817e-05	2.295e-05	3.493e-05	-1.047	-2.3979	0.404289	0.92511	0.150543	-0.343	-0.8584	1	0.953616	0.561677
MRPS36	NP_150597.1	28S ribosomal protein S36, mitochondrial [Homo sapiens]	0.00043893	0.00022204	0.00012589	9.414e-05	9.251e-05	0.00015836	-1.047	-2.3809	0.411374	0.925837	0.153007	-0.927	-1.8638	0.630584	0.949963	0.257049
IPO11	NP_001128251.1	1 genes:IPO11.NP_001128251.1:importin-11 isoform 1 [Homo sapiens] ;NP_057422.3:importin-11 isoform 2 [Homo sapiens] ;	1.371e-05	0	1.022e-05	0	7.04e-06	9.18e-06	-1.047	-0.3005	1	0.891167	0.735962	7.133	2.1396	0.606007	0.223441	0.973144
TRAPPC8	NP_055754.2	trafficking protein particle complex subunit 8 [Homo sapiens]	3.151e-05	1.062e-05	7.23e-06	5.07e-06	8.3e-06	9.74e-06	-1.045	-1.6697	0.763912	0.958318	0.316348	-0.675	-1.2109	1	0.964822	0.444987
RBCK1	NP_006453.1	1 genes:RBCK1.NP_006453.1:ranBP-type and C3HC4-type zinc finger-containing protein 1 isoform 1 [Homo sapiens] ;NP_112506.2:ranBP-type and C3HC4-type zinc finger-containing protein 1 isoform 2 [Homo sapiens] ;	3.715e-05	0	1.662e-05	0	0	0	-1.034	-0.2774	1	0.88682	0.743654	-8.52	-2.2237	0.451958	0.932029	0.176349
RGS10	NP_001005339.1	regulator of G-protein signaling 10 isoform a [Homo sapiens]	9.607e-05	5.616e-05	2.866e-05	2.679e-05	3.948e-05	5.149e-05	-1.029	-2.4365	0.38848	0.922928	0.14336	-0.511	-1.215	0.998282	0.964823	0.44497
LAMA5	NP_005551.3	laminin subunit alpha-5 precursor [Homo sapiens]	0	3.44e-06	0	1.31e-06	3.22e-06	1.89e-06	-1.028	-0.3456	1	0.897445	0.724257	4.602	1.3724	1	0.439621	0.993938
NDUFAF5	NP_001034464.1	1 genes:NDUFAF5.NP_001034464.1:arginine-hydroxylase NDUFAF5, mitochondrial isoform 2 [Homo sapiens] ;NP_001339332.1:arginine-hydroxylase NDUFAF5, mitochondrial isoform 4 [Homo sapiens] ;NP_001339336.1:arginine-hydroxylase NDUFAF5, mitochondrial isoform 5 [Homo sapiens] ;NP_077025.2:arginine-hydroxylase NDUFAF5, mitochondrial isoform 1 [Homo sapiens] ;	0	3.206e-05	0	1.529e-05	1.503e-05	1.47e-05	-1.011	-0.2134	1	0.87771	0.75877	6.756	2.0542	0.651491	0.242536	0.977211
FYCO1	NP_078789.2	FYVE and coiled-coil domain-containing protein 1 [Homo sapiens]	0	5.16e-06	3.51e-06	0	0	0	-1	-0.2646	1	0.886813	0.743665	-7.35	-2.1932	0.465907	0.933448	0.181703
DESI1	NP_056519.1	desumoylating isopeptidase 1 [Homo sapiens]	4.14e-05	0	3.087e-05	0	0	0	-0.999	-0.2459	1	0.882332	0.751258	-8.454	-2.732	0.25667	0.90507	0.094185
FOCAD	NP_001362496.1	focadhesin isoform 1 [Homo sapiens]	2.51e-05	1.552e-05	1.008e-05	5.38e-06	7.94e-06	1.035e-05	-0.996	-1.6889	0.75333	0.957896	0.312571	-0.842	-1.382	0.902423	0.964566	0.395048
NBR1	NP_001278500.1	1 genes:NBR1.NP_001278500.1:next to BRCA1 gene 1 protein isoform b [Homo sapiens] ;NP_001278501.1:next to BRCA1 gene 1 protein isoform c [Homo sapiens] ;NP_114068.1:next to BRCA1 gene 1 protein isoform a [Homo sapiens] ;	0	8.14e-06	5.54e-06	0	5.08e-06	4.97e-06	-0.991	-0.2916	1	0.889013	0.739819	5.008	1.4722	0.982187	0.406428	0.994382
S100A13	NP_001019381.1	protein S100-A13 [Homo sapiens]	0.00028389	0.00012965	0.00010585	4.947e-05	0.00038891	4.755e-05	-0.99	-1.644	0.778125	0.959131	0.323929	-0.362	-0.3675	1	0.904589	0.718043
POP4	NP_006618.1	ribonuclease P protein subunit p29 [Homo sapiens]	0	2.31e-05	0	2.204e-05	0	0	-0.989	-0.2184	1	0.877713	0.758767	-6.819	-2.0096	0.554719	0.943059	0.22194
RRP8	NP_056139.1	ribosomal RNA-processing protein 8 [Homo sapiens]	6.101e-05	7.244e-05	2.275e-05	2.658e-05	3.134e-05	4.088e-05	-0.987	-2.8166	0.25374	0.903729	0.088988	-0.635	-1.9606	0.579732	0.945655	0.234344
APPL1	NP_036228.1	DCC-interacting protein 13-alpha [Homo sapiens]	2.453e-05	2.867e-05	1.463e-05	6.84e-06	1.68e-05	2.301e-05	-0.987	-2.3103	0.441578	0.92946	0.165668	-0.314	-0.8451	1	0.952838	0.566036
MEGF6	NP_001400.3	multiple epidermal growth factor-like domains protein 6 precursor [Homo sapiens]	0	9.89e-06	0	9.44e-06	0	1.21e-05	-0.984	-0.2398	1	0.882329	0.751263	-0.868	-0.1842	1	0.874529	0.771862
QKI	NP_001288014.1	1 genes:QKI.NP_001288014.1:protein quaking isoform 5 [Homo sapiens] ;NP_006766.1:protein quaking isoform 1 [Homo sapiens] ;NP_996735.1:protein quaking isoform 2 [Homo sapiens] ;NP_996736.1:protein quaking isoform 3 [Homo sapiens] ;NP_996737.1:protein quaking isoform 4 [Homo sapiens] ;	0.00018798	0.00024419	5.452e-05	0.00011648	8.584e-05	9.796e-05	-0.979	-2.3488	0.424951	0.928015	0.160493	-0.84	-2.5724	0.310283	0.913392	0.116285
HYPK	NP_057484.4	huntingtin-interacting protein K isoform 1 [Homo sapiens]	0.00063231	0.00027301	0.00017146	0.00014024	3.937e-05	0.00011554	-0.979	-1.7285	0.731611	0.956548	0.301417	-1.842	-2.7651	0.246429	0.90305	0.089195
TUBB2B	NP_821080.1	tubulin beta-2B chain [Homo sapiens]	0	1.361e-05	2.03e-05	0	5.173e-05	9.34e-06	-0.978	-0.2872	1	0.889009	0.73982	7.148	1.9194	0.725744	0.279862	0.983874
TAPBP	NP_003181.3	1 genes:TAPBP.NP_003181.3:tapasin isoform 1 precursor [Homo sapiens] ;NP_757345.2:tapasin isoform 2 precursor [Homo sapiens] ;NP_757346.2:tapasin isoform 3 precursor [Homo sapiens] ;	3.105e-05	0	0	1.082e-05	0	0	-0.978	-0.2484	1	0.882333	0.751257	-8.213	-2.1046	0.507756	0.938338	0.201178
EIF2B3	NP_001160060.1	1 genes:EIF2B3.NP_001160060.1:translation initiation factor eIF-2B subunit gamma isoform 2 [Homo sapiens] ;NP_001248347.1:translation initiation factor eIF-2B subunit gamma isoform 3 [Homo sapiens] ;NP_065098.1:translation initiation factor eIF-2B subunit gamma isoform 1 [Homo sapiens] ;	7.597e-05	4.934e-05	1.888e-05	2.942e-05	2.313e-05	5.09e-05	-0.972	-2.1955	0.493306	0.935881	0.19009	-0.535	-1.0597	1	0.96206	0.496381
SLBP	NP_006518.1	histone RNA hairpin-binding protein isoform 1 [Homo sapiens]	6.44e-05	3.765e-05	1.921e-05	1.796e-05	5.293e-05	3.452e-05	-0.967	-2.4844	0.3694	0.920746	0.136385	-0.178	-0.3635	1	0.904588	0.718049
DENND4A	NP_001138295.1	1 genes:DENND4A.NP_001138295.1:C-myc promoter-binding protein isoform 1 [Homo sapiens] ;NP_001307764.1:C-myc promoter-binding protein isoform 3 [Homo sapiens] ;NP_001363848.1:C-myc promoter-binding protein isoform 2 [Homo sapiens] ;	0	4e-06	0	2.54e-06	0	0	-0.967	-0.2247	1	0.880036	0.755031	-6.279	-1.894	0.614524	0.948766	0.250429
CLINT1	NP_001182484.1	1 genes:CLINT1.NP_001182484.1:clathrin interactor 1 isoform 1 [Homo sapiens] ;NP_001182485.1:clathrin interactor 1 isoform 3 [Homo sapiens] ;NP_055481.1:clathrin interactor 1 isoform 2 [Homo sapiens] ;	9.195e-05	3.952e-05	2.017e-05	2.639e-05	4.446e-05	2.537e-05	-0.965	-2.0295	0.573414	0.94403	0.226041	-0.538	-0.9785	1	0.959389	0.522438
MEPCE	NP_062552.2	7SK snRNA methylphosphate capping enzyme isoform A [Homo sapiens]	0.00015142	4.795e-05	2.258e-05	4.574e-05	4.149e-05	5.749e-05	-0.965	-1.5654	0.821856	0.96125	0.347169	-0.489	-0.8099	1	0.950337	0.579093
TUBA4A	NP_001265481.1	tubulin alpha-4A chain isoform 2 [Homo sapiens]	4.016e-05	0.00030323	0.00014023	1.12e-05	0.00011746	0.00037356	-0.962	-0.7088	1	0.940435	0.61201	0.527	0.4903	1	0.714242	0.922677
ZMYND11	NP_001316986.1	1 genes:ZMYND11.NP_001316986.1:zinc finger MYND domain-containing protein 11 isoform h [Homo sapiens] ;NP_001357036.1:zinc finger MYND domain-containing protein 11 isoform c [Homo sapiens] ;NP_001357040.1:zinc finger MYND domain-containing protein 11 isoform e [Homo sapiens] ;NP_001357044.1:zinc finger MYND domain-containing protein 11 isoform j [Homo sapiens] ;NP_001357045.1:zinc finger MYND dom…	0	1.303e-05	1.773e-05	0	3.258e-05	1.992e-05	-0.957	-0.23	1	0.880038	0.755026	6.371	1.8143	0.785234	0.308683	0.98791
GLMN	NP_001306612.1	1 genes:GLMN.NP_001306612.1:glomulin isoform 2 [Homo sapiens] ;NP_444504.1:glomulin isoform 1 [Homo sapiens] ;	1.199e-05	0	1.341e-05	0	0	0	-0.956	-0.2329	1	0.880039	0.755024	-5.132	-0.9484	1	0.958291	0.531159
IDI1	NP_001304885.1	1 genes:IDI1.NP_001304885.1:isopentenyl-diphosphate Delta-isomerase 1 isoform b [Homo sapiens] ;NP_004499.2:isopentenyl-diphosphate Delta-isomerase 1 isoform a [Homo sapiens] ;	0.00012202	2.229e-05	2.275e-05	2.127e-05	2.09e-05	3.066e-05	-0.953	-1.1383	1	0.962278	0.476423	-0.736	-0.8643	1	0.953624	0.56167
TUBA1B	NP_006073.2	tubulin alpha-1B chain [Homo sapiens]	3.856e-05	0	0	1.075e-05	0	0	-0.952	-0.2217	1	0.877715	0.758766	-7.883	-2.2133	0.456687	0.93274	0.178997
BECN1	NP_001300927.1	1 genes:BECN1.NP_001300927.1:beclin-1 isoform a [Homo sapiens] ;NP_001300928.1:beclin-1 isoform b [Homo sapiens] ;NP_001300929.1:beclin-1 isoform c [Homo sapiens] ;	7.728e-05	3.388e-05	1.729e-05	2.155e-05	0	1.553e-05	-0.95	-2.0259	0.575216	0.944029	0.226054	-8.549	-2.7023	0.266114	0.906432	0.09764
RILPL1	NP_001306172.1	1 genes:RILPL1.NP_001306172.1:RILP-like protein 1 isoform 2 [Homo sapiens] ;NP_847884.2:RILP-like protein 1 isoform 1 [Homo sapiens] ;	9.911e-05	0	5.375e-05	0	2.468e-05	0	-0.946	-0.2349	1	0.880041	0.755024	-0.901	-0.2159	1	0.881511	0.760696
NARF	NP_001033707.1	1 genes:NARF.NP_001033707.1:nuclear prelamin A recognition factor isoform c [Homo sapiens] ;NP_001077077.1:nuclear prelamin A recognition factor isoform d [Homo sapiens] ;NP_036468.1:nuclear prelamin A recognition factor isoform a [Homo sapiens] ;NP_114174.1:nuclear prelamin A recognition factor isoform b [Homo sapiens] ;	2.628e-05	0	2.613e-05	0	1.2e-05	2.935e-05	-0.938	-0.2554	1	0.884589	0.747472	6.191	1.7655	0.813189	0.319811	0.98922
ZNF106	NP_001353774.1	1 genes:ZNF106.NP_001353774.1:zinc finger protein 106 isoform 5 [Homo sapiens] ;NP_001353775.1:zinc finger protein 106 isoform 6 [Homo sapiens] ;	0	2.67e-06	5.44e-06	0	0	0	-0.933	-0.1874	1	0.872958	0.766181	-6.752	-1.8014	0.664281	0.952824	0.273969
GBP1	NP_002044.2	guanylate-binding protein 1 [Homo sapiens]	8.812e-05	8.58e-06	1.314e-05	8.19e-06	2.012e-05	2.362e-05	-0.929	-0.7875	1	0.94681	0.585936	0.203	0.1344	1	0.808309	0.852766
CDK7	NP_001310998.1	1 genes:CDK7.NP_001310998.1:cyclin-dependent kinase 7 isoform 2 [Homo sapiens] ;NP_001790.1:cyclin-dependent kinase 7 isoform 1 [Homo sapiens] ;	6.841e-05	4.999e-05	1.701e-05	3.179e-05	3.124e-05	3.82e-05	-0.926	-1.9051	0.637061	0.949629	0.255452	-0.533	-1.4931	0.838229	0.962672	0.359022
ZNF865	NP_001182534.1	zinc finger protein 865 [Homo sapiens]	9.85e-06	0	0	4.58e-06	0	0	-0.925	-0.246	1	0.882332	0.751258	-6.933	-2.1	0.509982	0.938338	0.201198
CEBPB	NP_001272807.1	1 genes:CEBPB.NP_001272807.1:CCAAT/enhancer-binding protein beta isoform b [Homo sapiens] ;NP_005185.2:CCAAT/enhancer-binding protein beta isoform a [Homo sapiens] ;	7.56e-05	3.157e-05	2.416e-05	1.506e-05	0	0	-0.924	-1.7487	0.720593	0.95559	0.294117	-17.593	-36.0892	0	0.835914	0
DDI2	NP_115717.3	protein DDI1 homolog 2 [Homo sapiens]	3.486e-05	5.732e-05	2.6e-05	1.215e-05	5.373e-05	4.672e-05	-0.913	-1.8182	0.683056	0.953019	0.276192	0.159	0.3415	1	0.758305	0.894569
TTC4	NP_001278262.1	1 genes:TTC4.NP_001278262.1:tetratricopeptide repeat protein 4 isoform 2 [Homo sapiens] ;NP_004614.3:tetratricopeptide repeat protein 4 isoform 1 [Homo sapiens] ;	2.415e-05	0	3.602e-05	0	0	1.618e-05	-0.908	-0.265	1	0.886813	0.743664	-1.328	-0.3326	1	0.898696	0.729915
NEDD4L	NP_001138437.1	1 genes:NEDD4L.NP_001138437.1:E3 ubiquitin-protein ligase NEDD4-like isoform 2 [Homo sapiens] ;NP_001138439.1:E3 ubiquitin-protein ligase NEDD4-like isoform 1 [Homo sapiens] ;NP_001138440.1:E3 ubiquitin-protein ligase NEDD4-like isoform 4 [Homo sapiens] ;NP_001138441.1:E3 ubiquitin-protein ligase NEDD4-like isoform 5 [Homo sapiens] ;NP_001138443.1:E3 ubiquitin-protein ligase NEDD4-like isoform 6 …	4.887e-05	1.488e-05	1.822e-05	5.68e-06	1.395e-05	2.456e-05	-0.905	-1.1115	1	0.961648	0.485121	-0.317	-0.3822	1	0.90649	0.714046
KLHL22	NP_116164.2	kelch-like protein 22 [Homo sapiens]	2.194e-05	0	0	7.65e-06	1.127e-05	0	-0.904	-0.2463	1	0.882332	0.751258	-0.905	-0.257	1	0.888201	0.749316
YTHDF2	NP_001166599.1	YTH domain-containing family protein 2 isoform 1 [Homo sapiens]	7.208e-05	6.486e-05	2.687e-05	2.931e-05	4.526e-05	2.817e-05	-0.902	-2.8063	0.256889	0.90373	0.089008	-0.625	-1.4714	0.850753	0.963207	0.3669
ZNF446	NP_060378.1	zinc finger protein 446 isoform 1 [Homo sapiens]	3.091e-05	0	0	1.616e-05	0	1.553e-05	-0.898	-0.2573	1	0.884589	0.74747	-2.988	-0.7181	1	0.943469	0.609438
PSMF1	NP_001310337.1	1 genes:PSMF1.NP_001310337.1:proteasome inhibitor PI31 subunit isoform 4 [Homo sapiens] ;NP_001310338.1:proteasome inhibitor PI31 subunit isoform 5 [Homo sapiens] ;NP_001310339.1:proteasome inhibitor PI31 subunit isoform 6 [Homo sapiens] ;NP_848693.2:proteasome inhibitor PI31 subunit isoform 1 [Homo sapiens] ;	3.967e-05	0	2.958e-05	0	3.623e-05	2.658e-05	-0.898	-0.1971	1	0.87535	0.762491	7.061	2.1474	0.601921	0.220316	0.972444
PTPN9	NP_002824.1	tyrosine-protein phosphatase non-receptor type 9 [Homo sapiens]	7.038e-05	5.999e-05	1.749e-05	4.088e-05	2.008e-05	5.108e-05	-0.897	-1.873	0.653917	0.950792	0.262281	-0.721	-1.4543	0.860631	0.963446	0.370882
GTPBP10	NP_001036182.1	1 genes:GTPBP10.NP_001036182.1:GTP-binding protein 10 isoform 1 [Homo sapiens] ;NP_149098.2:GTP-binding protein 10 isoform 2 [Homo sapiens] ;	3.387e-05	4.95e-05	1.684e-05	1.574e-05	3.867e-05	1.513e-05	-0.896	-2.455	0.38104	0.9222	0.141	-0.543	-0.9569	1	0.9583	0.531144
C8orf33	NP_075568.1	UPF0488 protein C8orf33 [Homo sapiens]	7.593e-05	0	2.265e-05	0	0	0	-0.893	-0.2253	1	0.880036	0.75503	-8.667	-2.2191	0.454047	0.932029	0.17637
VPS72	NP_001258016.1	1 genes:VPS72.NP_001258016.1:vacuolar protein sorting-associated protein 72 homolog isoform 1 [Homo sapiens] ;NP_005988.1:vacuolar protein sorting-associated protein 72 homolog isoform 2 [Homo sapiens] ;	5.564e-05	0	3.458e-05	0	0	1.864e-05	-0.893	-0.2162	1	0.877711	0.758768	-1.102	-0.3268	1	0.898691	0.729919
CIAPIN1	NP_001295287.1	1 genes:CIAPIN1.NP_001295287.1:anamorsin isoform 3 [Homo sapiens] ;NP_064709.2:anamorsin isoform 1 [Homo sapiens] ;	0.00019611	0.00015285	8.775e-05	5.468e-05	9.851e-05	0.0001752	-0.89	-2.3448	0.426661	0.928014	0.1605	-0.267	-0.759	1	0.947562	0.592153
SGTA	NP_003012.1	small glutamine-rich tetratricopeptide repeat-containing protein alpha [Homo sapiens]	0.00017777	3.247e-05	5.8e-05	1.549e-05	6.849e-05	3.722e-05	-0.882	-0.8421	1	0.950457	0.568438	-0.38	-0.3928	1	0.908355	0.710035
ARMCX2	NP_808818.1	armadillo repeat-containing X-linked protein 2 [Homo sapiens]	3.852e-05	4.021e-05	1.231e-05	2.301e-05	2.261e-05	1.106e-05	-0.878	-1.8514	0.665351	0.951925	0.269167	-0.898	-2.0513	0.533849	0.941061	0.212884
SGSH	NP_000190.1	1 genes:SGSH.NP_000190.1:N-sulphoglucosamine sulphohydrolase isoform 1 precursor [Homo sapiens] ;NP_001339850.1:N-sulphoglucosamine sulphohydrolase isoform 2 precursor [Homo sapiens] ;NP_001339851.1:N-sulphoglucosamine sulphohydrolase isoform 3 precursor [Homo sapiens] ;	0	2.025e-05	0	2.897e-05	0	1.393e-05	-0.878	-0.2509	1	0.884588	0.747477	0.898	0.1997	1	0.792322	0.867502
PPM1B	NP_001028729.1	1 genes:PPM1B.NP_001028729.1:protein phosphatase 1B isoform 5 [Homo sapiens] ;NP_002697.1:protein phosphatase 1B isoform 1 [Homo sapiens] ;NP_808907.1:protein phosphatase 1B isoform 2 [Homo sapiens] ;	0	2.675e-05	0	1.276e-05	1.254e-05	3.679e-05	-0.875	-0.2317	1	0.880038	0.755025	8.004	1.8587	0.759966	0.294082	0.985994
STAM2	NP_005834.4	signal transducing adapter molecule 2 [Homo sapiens]	1.325e-05	0	1.976e-05	0	0	0	-0.874	-0.2447	1	0.882331	0.751259	-8.011	-2.3105	0.413595	0.927736	0.160948
FHOD1	NP_001305131.1	1 genes:FHOD1.NP_001305131.1:FH1/FH2 domain-containing protein 1 isoform 1 [Homo sapiens] ;NP_037373.2:FH1/FH2 domain-containing protein 1 isoform 2 [Homo sapiens] ;	4.091e-05	4.484e-05	1.09e-05	2.852e-05	2.202e-05	3.525e-05	-0.872	-1.6915	0.751898	0.957898	0.312569	-0.445	-1.1837	1	0.964584	0.453474
PTPRK	NP_001129120.1	1 genes:PTPRK.NP_001129120.1:receptor-type tyrosine-protein phosphatase kappa isoform a precursor [Homo sapiens] ;NP_001278910.1:receptor-type tyrosine-protein phosphatase kappa isoform c precursor [Homo sapiens] ;NP_001278913.1:receptor-type tyrosine-protein phosphatase kappa isoform f precursor [Homo sapiens] ;NP_002835.2:receptor-type tyrosine-protein phosphatase kappa isoform b precursor [Hom…	7.22e-06	0	7.17e-06	0	0	0	-0.872	-0.2414	1	0.882329	0.751261	-7.609	-2.7273	0.258149	0.90507	0.094194
FMN2	NP_001292353.1	formin-2 isoform 1 [Homo sapiens]	0	2.94e-06	3.01e-06	0	4.14e-06	0	-0.872	-0.1981	1	0.87535	0.76249	0.604	0.1566	1	0.805169	0.855775
HN1L	NP_653171.1	jupiter microtubule associated homolog 2 [Homo sapiens]	7.321e-05	5.35e-05	2.73e-05	2.552e-05	8.776e-05	3.679e-05	-0.87	-2.857	0.241653	0.9017	0.084048	-0.065	-0.1404	1	0.867247	0.782822
ECD	NP_001129224.1	1 genes:ECD.NP_001129224.1:protein ecdysoneless homolog isoform 2 [Homo sapiens] ;NP_001129225.1:protein ecdysoneless homolog isoform 3 [Homo sapiens] ;NP_009196.1:protein ecdysoneless homolog isoform 1 [Homo sapiens] ;	2.055e-05	3.378e-05	1.149e-05	1.074e-05	0	3.098e-05	-0.869	-2.3491	0.424823	0.928015	0.160493	-7.164	-2.1676	0.477798	0.934859	0.187139
CALM2	NP_001292553.1	2 genes:CALM1,CALM2.NP_001292553.1:calmodulin-2 isoform 1 [Homo sapiens] ;NP_001350599.1:calmodulin-1 isoform 1 [Homo sapiens] ;NP_008819.1:calmodulin-1 isoform 2 [Homo sapiens] ;	0.00065317	6.45e-05	0.00010531	7.383e-05	6.046e-05	0.00013011	-0.866	-0.8407	1	0.949601	0.572795	-0.847	-0.6712	1	0.940067	0.622362
NNMT	NP_001358974.1	nicotinamide N-methyltransferase [Homo sapiens]	0.0001449	3.85e-05	5.894e-05	1.837e-05	4.511e-05	6.178e-05	-0.862	-1.0078	1	0.958647	0.515753	-0.284	-0.4107	1	0.910193	0.705999
FUBP1	NP_003893.2	far upstream element-binding protein 1 isoform 2 [Homo sapiens]	0.00042377	0.00043989	0.00018451	0.00016814	0.00020486	0.00018009	-0.86	-2.5082	0.360143	0.919294	0.131887	-0.824	-2.9168	0.20324	0.895892	0.072516
SRFBP1	NP_689759.2	serum response factor-binding protein 1 [Homo sapiens]	0	1.185e-05	0	1.695e-05	0	1.086e-05	-0.858	-0.2624	1	0.884593	0.747467	-0.683	-0.1837	1	0.874529	0.771862
ZNF654	NP_001337063.1	1 genes:ZNF654.NP_001337063.1:zinc finger protein 654 isoform 1 [Homo sapiens] ;NP_001337064.1:zinc finger protein 654 isoform 2 [Homo sapiens] ;NP_001337065.1:zinc finger protein 654 isoform 3 [Homo sapiens] ;NP_001337066.1:zinc finger protein 654 isoform 4 [Homo sapiens] ;	1.233e-05	9.01e-06	4.6e-06	4.3e-06	8.45e-06	6.2e-06	-0.855	-2.5471	0.345334	0.917121	0.125329	-0.357	-0.9741	1	0.959386	0.522451
APRT	NP_000476.1	1 genes:APRT.NP_000476.1:adenine phosphoribosyltransferase isoform a [Homo sapiens] ;NP_001025189.1:adenine phosphoribosyltransferase isoform b [Homo sapiens] ;	3.864e-05	0	2.882e-05	0	0.00013234	0	-0.853	-0.2146	1	0.877711	0.758769	0.372	0.0873	1	0.820578	0.840421
BCAR1	NP_001164185.1	1 genes:BCAR1.NP_001164185.1:breast cancer anti-estrogen resistance protein 1 isoform 1 [Homo sapiens] ;NP_001164186.1:breast cancer anti-estrogen resistance protein 1 isoform 2 [Homo sapiens] ;NP_001164187.1:breast cancer anti-estrogen resistance protein 1 isoform 3 [Homo sapiens] ;NP_001164188.1:breast cancer anti-estrogen resistance protein 1 isoform 4 [Homo sapiens] ;NP_001164189.1:breast can…	4.936e-05	3.329e-05	2.265e-05	1.323e-05	5.2e-06	2.798e-05	-0.852	-1.7539	0.717765	0.955591	0.294095	-1.142	-1.326	0.934742	0.964957	0.411476
ZNF644	NP_958357.1	zinc finger protein 644 isoform 1 [Homo sapiens]	2.097e-05	3.83e-06	3.91e-06	3.65e-06	0	5.27e-06	-0.848	-1.0783	1	0.960914	0.493859	-7.042	-1.5195	0.823016	0.96208	0.351203
DUSP23	NP_001306587.1	dual specificity protein phosphatase 23 [Homo sapiens]	0.00023185	0.00010164	6.916e-05	6.465e-05	4.764e-05	0.00012427	-0.847	-1.8368	0.673118	0.952477	0.272659	-0.713	-1.1975	1	0.964714	0.449225
TBL1XR1	NP_001308124.1	F-box-like/WD repeat-containing protein TBL1XR1 isoform 2 [Homo sapiens]	0.00024434	0.00015473	6.626e-05	9.588e-05	0.00015853	0.00011642	-0.838	-2.014	0.581188	0.944677	0.229212	-0.418	-0.8037	1	0.95033	0.579103
CCDC88A	NP_001129069.1	1 genes:CCDC88A.NP_001129069.1:girdin isoform 1 [Homo sapiens] ;NP_001352409.1:girdin isoform 4 [Homo sapiens] ;NP_060554.3:girdin isoform 2 [Homo sapiens] ;	0	5.44e-06	2.77e-06	0	3.82e-06	4.98e-06	-0.838	-0.2712	1	0.886815	0.743657	6.219	1.7869	0.80091	0.316096	0.988794
LRBA	NP_001186211.2	1 genes:LRBA.NP_001186211.2:lipopolysaccharide-responsive and beige-like anchor protein isoform 1 [Homo sapiens] ;NP_001351834.1:lipopolysaccharide-responsive and beige-like anchor protein isoform 3 [Homo sapiens] ;NP_006717.2:lipopolysaccharide-responsive and beige-like anchor protein isoform 2 [Homo sapiens] ;	1.22e-05	6.24e-06	2.73e-06	5.1e-06	3.34e-06	3.27e-06	-0.836	-1.5693	0.819678	0.960928	0.343281	-0.984	-1.9416	0.589567	0.946288	0.237534
BIRC6	NP_057336.3	baculoviral IAP repeat-containing protein 6 [Homo sapiens]	9.31e-06	5.23e-06	5.87e-06	1.5e-06	1.47e-06	6.24e-06	-0.835	-0.9738	1	0.956978	0.528901	-0.8	-1.1394	1	0.963853	0.470525
PUS7L	NP_001092085.1	pseudouridylate synthase 7 homolog-like protein isoform a [Homo sapiens]	9.92e-06	0	0	6.92e-06	1.699e-05	2.327e-05	-0.835	-0.243	1	0.88233	0.75126	7.343	2.1778	0.586115	0.214209	0.971021
PACSIN3	NP_057307.2	protein kinase C and casein kinase substrate in neurons protein 3 [Homo sapiens]	0.00014764	0.00010188	3.67e-05	7.433e-05	2.247e-05	4.396e-05	-0.83	-1.9237	0.62737	0.949037	0.252074	-1.401	-2.2599	0.435716	0.929888	0.168554
PRDM16	NP_071397.3	1 genes:PRDM16.NP_071397.3:histone-lysine N-methyltransferase PRDM16 isoform 1 [Homo sapiens] ;NP_955533.2:histone-lysine N-methyltransferase PRDM16 isoform 2 [Homo sapiens] ;	0	5.97e-06	0	9.5e-06	0	9.13e-06	-0.83	-0.2029	1	0.875352	0.762486	0.525	0.1417	1	0.808309	0.852765
GSTZ1	NP_001299589.1	1 genes:GSTZ1.NP_001299589.1:maleylacetoacetate isomerase isoform 3 [Homo sapiens] ;NP_001350632.1:maleylacetoacetate isomerase isoform 4 [Homo sapiens] ;NP_665877.1:maleylacetoacetate isomerase isoform 1 [Homo sapiens] ;NP_665878.2:maleylacetoacetate isomerase isoform 2 [Homo sapiens] ;	6.48e-05	0	0	4.517e-05	4.439e-05	5.789e-05	-0.829	-0.2036	1	0.875352	0.762486	6.97	1.917	0.727089	0.279859	0.983875
CASP6	NP_001217.2	caspase-6 isoform alpha precursor [Homo sapiens]	0.00014243	4.336e-05	6.196e-05	1.655e-05	1.626e-05	3.976e-05	-0.828	-1.0697	1	0.960516	0.498215	-1.094	-1.5222	0.821463	0.962082	0.351194
MKLN1	NP_001138826.1	1 genes:MKLN1.NP_001138826.1:muskelin isoform 1 [Homo sapiens] ;NP_037387.2:muskelin isoform 2 [Homo sapiens] ;	3.419e-05	0	0	1.021e-05	0	0	-0.828	-0.2146	1	0.877711	0.758769	-8.48	-2.7946	0.23755	0.901718	0.085962
PLAU	NP_001138503.1	0 genes:. 2 proteins in this group did not match any genes. NP_001138503.1:urokinase-type plasminogen activator isoform 2 [Homo sapiens] ;NP_002649.1:urokinase-type plasminogen activator isoform 1 preproprotein [Homo sapiens] ;	4.2e-05	5.524e-05	1.879e-05	2.342e-05	4.028e-05	2.814e-05	-0.826	-2.4237	0.39368	0.923655	0.145727	-0.327	-0.9062	1	0.956449	0.544248
HN1	NP_001002032.1	1 genes:JPT1.NP_001002032.1:jupiter microtubule associated homolog 1 isoform 2 [Homo sapiens] ;NP_001275540.1:jupiter microtubule associated homolog 1 isoform 4 [Homo sapiens] ;NP_057269.1:jupiter microtubule associated homolog 1 isoform 1 [Homo sapiens] ;	0.00032664	0.00016847	0.0001003	0.00010715	5.264e-05	6.437e-05	-0.825	-1.858	0.661849	0.951362	0.26573	-1.385	-3.4335	0.097868	0.874423	0.031843
SMG8	NP_060619.4	protein SMG8 [Homo sapiens]	2.807e-05	2.308e-05	2.355e-05	4.89e-06	2.163e-05	1.646e-05	-0.824	-1.1723	1	0.963041	0.463449	-0.29	-0.7836	1	0.948522	0.587787
CUL7	NP_001161842.1	1 genes:CUL7. 1 proteins in this group did not match any genes. NP_001161842.1:cullin-7 isoform 1 [Homo sapiens] ;NP_001361801.1:cullin-7 isoform 1 [Homo sapiens] ;NP_001361802.1:cullin-7 isoform 3 [Homo sapiens] ;NP_001361803.1:cullin-7 isoform 4 [Homo sapiens] ;NP_055595.2:cullin-7 isoform 2 [Homo sapiens] ;	1.366e-05	0	0	4.08e-06	0	0	-0.824	-0.2286	1	0.880037	0.755027	-6.617	-1.5241	0.820369	0.962083	0.351189
HMGCS1	NP_001311149.1	1 genes:HMGCS1.NP_001311149.1:hydroxymethylglutaryl-CoA synthase, cytoplasmic isoform 1 [Homo sapiens] ;NP_001311152.1:hydroxymethylglutaryl-CoA synthase, cytoplasmic isoform 2 [Homo sapiens] ;	2.675e-05	0	2.494e-05	0	2.749e-05	8.96e-06	-0.824	-0.2092	1	0.875356	0.762484	7.093	2.629	0.377166	0.125821	0.94474
STMN1	NP_981944.1	stathmin isoform a [Homo sapiens]	0.00114368	0.00090389	0.00053956	0.00037421	0.0004956	0.00056298	-0.823	-2.1695	0.505453	0.93728	0.195815	-0.632	-1.9455	0.587542	0.946289	0.237517
IAH1	NP_001034702.1	1 genes:IAH1.NP_001034702.1:isoamyl acetate-hydrolyzing esterase 1 homolog isoform a precursor [Homo sapiens] ;NP_001307787.1:isoamyl acetate-hydrolyzing esterase 1 homolog isoform b [Homo sapiens] ;NP_001307788.1:isoamyl acetate-hydrolyzing esterase 1 homolog isoform c [Homo sapiens] ;	0.00011218	4.099e-05	4.183e-05	1.955e-05	4.803e-05	3.758e-05	-0.823	-1.3441	0.945572	0.964116	0.412291	-0.398	-0.6705	1	0.940066	0.622363
TYMS	NP_001062.1	1 genes:TYMS.NP_001062.1:thymidylate synthase isoform 1 [Homo sapiens] ;NP_001341796.1:thymidylate synthase isoform 2 [Homo sapiens] ;	0.00026666	7.307e-05	7.457e-05	4.647e-05	4.566e-05	0.000134	-0.821	-1.3576	0.938062	0.96407	0.408106	-0.611	-0.6743	1	0.94007	0.622356
PDLIM3	NP_001107579.1	PDZ and LIM domain protein 3 isoform b [Homo sapiens]	5.503e-05	0	2.462e-05	0	0	0	-0.818	-0.207	1	0.875355	0.762484	-8.063	-2.1357	0.492845	0.936957	0.195468
KIF15	NP_064627.1	kinesin-like protein KIF15 [Homo sapiens]	1.754e-05	5.49e-06	5.61e-06	3.49e-06	3.43e-06	1.007e-05	-0.812	-1.1466	1	0.962554	0.472098	-0.533	-0.6224	1	0.935114	0.63946
NFKBIL1	NP_001138433.1	1 genes:NFKBIL1.NP_001138433.1:NF-kappa-B inhibitor-like protein 1 isoform 2 [Homo sapiens] ;NP_001138434.1:NF-kappa-B inhibitor-like protein 1 isoform 3 [Homo sapiens] ;NP_001138435.1:NF-kappa-B inhibitor-like protein 1 isoform 4 [Homo sapiens] ;NP_004998.3:NF-kappa-B inhibitor-like protein 1 isoform 1 [Homo sapiens] ;	2.851e-05	0	0	1.325e-05	0	1.273e-05	-0.81	-0.1766	1	0.870534	0.769848	-0.252	-0.0633	1	0.851816	0.804054
ANKHD1	NP_060217.1	ankyrin repeat and KH domain-containing protein 1 isoform 1 [Homo sapiens]	8.21e-06	6e-06	4.08e-06	2.38e-06	0	5.42e-06	-0.809	-1.7942	0.69595	0.954079	0.283276	-6.823	-2.2631	0.434297	0.929888	0.16854
LENG8	NP_443157.1	leukocyte receptor cluster member 8 isoform 3 [Homo sapiens]	5.217e-05	3.812e-05	1.297e-05	3.03e-05	1.787e-05	3.495e-05	-0.807	-1.4757	0.872046	0.962829	0.371118	-0.59	-1.2875	0.956881	0.965059	0.423938
RIN1	NP_001350488.1	1 genes:RIN1.NP_001350488.1:ras and Rab interactor 1 isoform 2 [Homo sapiens] ;NP_004283.2:ras and Rab interactor 1 isoform 1 [Homo sapiens] ;	3.224e-05	0	1.374e-05	0	1.262e-05	6.17e-06	-0.807	-0.2269	1	0.880036	0.755028	6.208	1.1438	1	0.511761	0.987926
SUMO3	NP_001273345.1	small ubiquitin-related modifier 3 isoform 2 [Homo sapiens]	4.933e-05	0	0.00011036	0	0	5.949e-05	-0.807	-0.2179	1	0.877712	0.758767	0.811	0.2083	1	0.792323	0.867501
CDK6	NP_001138778.1	cyclin-dependent kinase 6 [Homo sapiens]	3.2e-05	0	1.591e-05	0	2.923e-05	1.43e-05	-0.806	-0.1741	1	0.870532	0.769849	7.938	2.0567	0.650141	0.242549	0.977211
LTN1	NP_001307695.2	1 genes:LTN1.NP_001307695.2:E3 ubiquitin-protein ligase listerin isoform 2 [Homo sapiens] ;NP_056380.3:E3 ubiquitin-protein ligase listerin isoform 1 [Homo sapiens] ;	1.389e-05	0	1.184e-05	0	0	6.65e-06	-0.799	-0.2455	1	0.882331	0.751258	-0.527	-0.1255	1	0.864756	0.786426
ANKRD44	NP_001182073.1	1 genes:ANKRD44.NP_001182073.1:serine/threonine-protein phosphatase 6 regulatory ankyrin repeat subunit B isoform A [Homo sapiens] ;NP_001354424.1:serine/threonine-protein phosphatase 6 regulatory ankyrin repeat subunit B isoform C [Homo sapiens] ;NP_001354425.1:serine/threonine-protein phosphatase 6 regulatory ankyrin repeat subunit B isoform D [Homo sapiens] ;NP_001354426.1:serine/threonine-pro…	0	5.12e-06	0	4.88e-06	0	0	-0.794	-0.235	1	0.880041	0.755024	-6.609	-1.6544	0.745987	0.958306	0.313255
VPS37B	NP_078943.1	vacuolar protein sorting-associated protein 37B [Homo sapiens]	2.44e-05	0	4.55e-05	0	2.507e-05	0	-0.792	-0.1866	1	0.872958	0.766182	0.116	0.0294	1	0.83237	0.827597
PRDM2	NP_001007258.1	1 genes:PRDM2.NP_001007258.1:PR domain zinc finger protein 2 isoform c [Homo sapiens] ;NP_036363.2:PR domain zinc finger protein 2 isoform a [Homo sapiens] ;NP_056950.2:PR domain zinc finger protein 2 isoform b [Homo sapiens] ;	4.7e-06	0	0	3.27e-06	0	3.15e-06	-0.789	-0.2622	1	0.884593	0.747467	-1.379	-0.3916	1	0.908355	0.710037
PHF12	NP_001028733.1	PHD finger protein 12 isoform 1 [Homo sapiens]	3.464e-05	2.531e-05	1.55e-05	1.207e-05	2.373e-05	2.553e-05	-0.788	-2.2187	0.482598	0.93447	0.184481	-0.169	-0.507	1	0.923681	0.673182
CAMSAP1	NP_056262.3	calmodulin-regulated spectrin-associated protein 1 [Homo sapiens]	6.51e-06	0	0	3.03e-06	2.97e-06	7.27e-06	-0.785	-0.2616	1	0.884592	0.747468	5.93	1.7428	0.826244	0.327357	0.990018
NDRG1	NP_001361774.1	protein NDRG1 isoform 1 [Homo sapiens]	0.00023832	1.935e-05	1.975e-05	4.307e-05	1.209e-05	2.366e-05	-0.784	-0.7822	1	0.94583	0.59028	-1.131	-1.0312	1	0.961269	0.505052
WDR34	NP_443076.2	WD repeat-containing protein 34 [Homo sapiens]	1.946e-05	0	2.903e-05	0	0	0	-0.784	-0.2209	1	0.877714	0.758766	-6.902	-1.7184	0.710059	0.955965	0.295073
ECHDC1	NP_001002030.1	1 genes:ECHDC1.NP_001002030.1:ethylmalonyl-CoA decarboxylase isoform 1 [Homo sapiens] ;NP_001132982.1:ethylmalonyl-CoA decarboxylase isoform 5 [Homo sapiens] ;	3.466e-05	5.91e-05	2.585e-05	1.611e-05	3.166e-05	6.967e-05	-0.783	-1.9073	0.635911	0.94963	0.255446	0.042	0.0728	1	0.823571	0.83726
FCF1	NP_001305437.1	1 genes:FCF1.NP_001305437.1:rRNA-processing protein FCF1 homolog isoform 2 [Homo sapiens] ;NP_057046.1:rRNA-processing protein FCF1 homolog isoform 1 [Homo sapiens] ;	0.00020567	8.197e-05	6.971e-05	5.213e-05	7.684e-05	3.758e-05	-0.782	-0.9687	1	0.956974	0.528913	-0.822	-1.142	1	0.963856	0.470522
EXOC6	NP_001013870.1	exocyst complex component 6 isoform b [Homo sapiens]	1.161e-05	1.59e-05	6.49e-06	6.07e-06	8.94e-06	7e-06	-0.781	-2.4356	0.388845	0.922928	0.143364	-0.545	-1.6819	0.73049	0.957403	0.305911
UBAP1	NP_001164672.1	1 genes:UBAP1.NP_001164672.1:ubiquitin-associated protein 1 isoform 2 [Homo sapiens] ;NP_001164673.1:ubiquitin-associated protein 1 isoform 3 [Homo sapiens] ;NP_001164675.1:ubiquitin-associated protein 1 isoform 1 [Homo sapiens] ;	0	8.98e-06	0	8.57e-06	0	1.647e-05	-0.779	-0.2032	1	0.875352	0.762486	-1.144	-0.312	1	0.896659	0.733841
PCYT2	NP_001171846.1	1 genes:PCYT2.NP_001171846.1:ethanolamine-phosphate cytidylyltransferase isoform 1 [Homo sapiens] ;NP_001317447.1:ethanolamine-phosphate cytidylyltransferase isoform 7 [Homo sapiens] ;NP_002852.1:ethanolamine-phosphate cytidylyltransferase isoform 2 [Homo sapiens] ;	0.00011108	1.873e-05	1.912e-05	2.383e-05	2.926e-05	2.863e-05	-0.778	-1.0547	1	0.960087	0.502591	-0.446	-0.5702	1	0.929656	0.656407
C17orf49	NP_001136270.1	1 genes:C17orf49.NP_001136270.1:chromatin complexes subunit BAP18 isoform 1 [Homo sapiens] ;NP_777553.1:chromatin complexes subunit BAP18 isoform 2 [Homo sapiens] ;	5.434e-05	0	5.403e-05	0	0	0	-0.778	-0.2055	1	0.875353	0.762485	-8.107	-2.2475	0.441241	0.930603	0.171127
ADO	NP_116193.2	2-aminoethanethiol dioxygenase [Homo sapiens]	5.152e-05	6.588e-05	1.921e-05	3.591e-05	2.647e-05	6.041e-05	-0.776	-1.9487	0.614437	0.947825	0.245416	-0.363	-0.7334	1	0.945571	0.600815
RUFY1	NP_001035542.1	1 genes:RUFY1.NP_001035542.1:RUN and FYVE domain-containing protein 1 isoform b [Homo sapiens] ;NP_079434.3:RUN and FYVE domain-containing protein 1 isoform a [Homo sapiens] ;	4.057e-05	1.694e-05	8.64e-06	1.616e-05	1.985e-05	2.718e-05	-0.775	-1.3967	0.916255	0.963819	0.39564	-0.045	-0.082	1	0.857087	0.797085
ERF	NP_001287964.1	1 genes:ERF.NP_001287964.1:ETS domain-containing transcription factor ERF isoform 2 [Homo sapiens] ;NP_006485.2:ETS domain-containing transcription factor ERF isoform 1 [Homo sapiens] ;	6.617e-05	5.91e-05	3.29e-05	2.563e-05	4.029e-05	3.941e-05	-0.771	-2.6574	0.305523	0.911388	0.108945	-0.447	-1.54	0.811226	0.961768	0.347303
MTPN	NP_665807.1	myotrophin [Homo sapiens]	0.0012673	0.00096907	0.0003956	0.00069851	0.0003028	0.00120456	-0.771	-1.7485	0.720702	0.95559	0.294118	-0.692	-0.8452	1	0.952838	0.566035
FRMD6	NP_001035946.1	1 genes:FRMD6.NP_001035946.1:FERM domain-containing protein 6 isoform 1 [Homo sapiens] ;NP_001253975.1:FERM domain-containing protein 6 isoform 2 [Homo sapiens] ;	7.363e-05	4.966e-05	1.689e-05	4.343e-05	3.88e-05	1.518e-05	-0.771	-1.4346	0.89506	0.963402	0.383314	-0.917	-1.5492	0.805943	0.961433	0.343447
TIGAR	NP_065108.1	fructose-2,6-bisphosphatase TIGAR [Homo sapiens]	0.0001288	4.706e-05	6.724e-05	1.796e-05	3.529e-05	3.452e-05	-0.77	-1.1182	1	0.96197	0.480788	-0.811	-1.4643	0.854853	0.963203	0.366924
NT5DC1	NP_689942.2	5'-nucleotidase domain-containing protein 1 [Homo sapiens]	3.822e-05	1.675e-05	1.14e-05	1.066e-05	2.618e-05	5.121e-05	-0.769	-1.7015	0.746403	0.957458	0.308832	0.396	0.705	1	0.651054	0.952567
NUBPL	NP_001188502.1	1 genes:NUBPL.NP_001188502.1:iron-sulfur protein NUBPL isoform 2 [Homo sapiens] ;NP_001188503.1:iron-sulfur protein NUBPL isoform 3 [Homo sapiens] ;NP_079428.2:iron-sulfur protein NUBPL isoform 1 precursor [Homo sapiens] ;	0	2.279e-05	0	7.61e-05	3.205e-05	0	-0.765	-0.2048	1	0.875353	0.762485	-0.867	-0.1983	1	0.876891	0.768161
NDUFS2	NP_001159631.1	1 genes:NDUFS2.NP_001159631.1:NADH dehydrogenase [ubiquinone] iron-sulfur protein 2, mitochondrial isoform 2 precursor [Homo sapiens] ;NP_004541.1:NADH dehydrogenase [ubiquinone] iron-sulfur protein 2, mitochondrial isoform 1 precursor [Homo sapiens] ;	2.283e-05	0	1.702e-05	0	1.564e-05	1.53e-05	-0.763	-0.1722	1	0.870532	0.769851	7.028	1.9445	0.711721	0.272873	0.98275
ANKRD28	NP_001336206.1	1 genes:ANKRD28.NP_001336206.1:serine/threonine-protein phosphatase 6 regulatory ankyrin repeat subunit A isoform c [Homo sapiens] ;NP_001336207.1:serine/threonine-protein phosphatase 6 regulatory ankyrin repeat subunit A isoform d [Homo sapiens] ;NP_001336208.1:serine/threonine-protein phosphatase 6 regulatory ankyrin repeat subunit A isoform e [Homo sapiens] ;NP_001336210.1:serine/threonine-pro…	2.242e-05	1.638e-05	1.194e-05	6.7e-06	6.58e-06	6.44e-06	-0.761	-1.6732	0.761981	0.95832	0.316337	-1.048	-3.2795	0.123155	0.880329	0.04166
SPECC1L	NP_001241661.2	0 genes:. 2 proteins in this group did not match any genes. NP_001241661.2:cytospin-A isoform 2 [Homo sapiens] ;NP_056145.4:cytospin-A isoform 1 [Homo sapiens] ;	6.452e-05	6.365e-05	4.571e-05	2.024e-05	3.536e-05	6.052e-05	-0.761	-1.5875	0.809527	0.960597	0.339355	-0.342	-0.9367	1	0.957705	0.535513
CBX1	NP_006798.1	chromobox protein homolog 1 [Homo sapiens]	0.00016919	0.00026098	5.607e-05	0.00015015	0.00025752	0.00015114	-0.757	-1.261	0.991505	0.963964	0.437666	-0.079	-0.1773	1	0.874526	0.771867
TBC1D2	NP_001254500.1	1 genes:TBC1D2.NP_001254500.1:TBC1 domain family member 2A isoform 1 [Homo sapiens] ;NP_060891.3:TBC1 domain family member 2A isoform 2 [Homo sapiens] ;	4.872e-05	3.286e-05	1.956e-05	1.829e-05	2.054e-05	3.515e-05	-0.753	-2.1219	0.528088	0.93935	0.204623	-0.395	-0.863	1	0.953622	0.56167
GSS	NP_000169.1	glutathione synthetase [Homo sapiens]	3.668e-05	2.68e-05	2.188e-05	1.023e-05	2.01e-05	2.458e-05	-0.751	-1.5726	0.817837	0.960928	0.343264	-0.336	-0.8624	1	0.953621	0.561671
DBI	NP_001073331.1	1 genes:DBI.NP_001073331.1:acyl-CoA-binding protein isoform 3 [Homo sapiens] ;NP_001073332.1:acyl-CoA-binding protein isoform 2 [Homo sapiens] ;NP_001171488.1:acyl-CoA-binding protein isoform 4 [Homo sapiens] ;NP_001171512.1:acyl-CoA-binding protein isoform 5 [Homo sapiens] ;NP_001171514.1:acyl-CoA-binding protein isoform 6 [Homo sapiens] ;NP_001269562.1:acyl-CoA-binding protein isoform 1 [Homo s…	0.00123918	0.000701	0.00074522	0.00027865	0.00057498	0.00074993	-0.75	-1.2888	0.976205	0.964097	0.42916	-0.355	-0.7919	1	0.949439	0.583448
NOA1	NP_115689.1	nitric oxide-associated protein 1 [Homo sapiens]	2.491e-05	2.912e-05	7.43e-06	2.431e-05	1.024e-05	2.671e-05	-0.75	-1.1827	1	0.96305	0.463422	-0.437	-0.8546	1	0.953614	0.561687
SERPINB8	NP_002631.3	serpin B8 isoform a [Homo sapiens]	6.509e-05	2.718e-05	1.442e-05	2.593e-05	1.911e-05	3.115e-05	-0.749	-1.384	0.923345	0.963921	0.39978	-0.517	-0.9169	1	0.956459	0.544224
CHURC1-FNTB	NP_001189488.1	CHURC1-FNTB protein isoform 1 [Homo sapiens]	4.888e-05	1.531e-05	1.562e-05	9.74e-06	3.348e-05	3.275e-05	-0.748	-1.1205	1	0.961971	0.480779	0.258	0.395	1	0.743987	0.904474
ATP6V1D	NP_057078.1	V-type proton ATPase subunit D [Homo sapiens]	0.00012672	3.086e-05	2.1e-05	3.926e-05	3.858e-05	1.887e-05	-0.748	-0.9958	1	0.958116	0.520134	-0.814	-0.8146	1	0.951193	0.574758
CDC42EP3	NP_006440.2	cdc42 effector protein 3 [Homo sapiens]	0.00020538	0.00010004	6.126e-05	7.635e-05	7.503e-05	8.256e-05	-0.747	-1.698	0.748325	0.957456	0.308842	-0.589	-1.3733	0.907451	0.964559	0.395067
SERPINE1	NP_000593.1	plasminogen activator inhibitor 1 precursor [Homo sapiens]	0.00019032	0.00012642	7.741e-05	7.237e-05	9.481e-05	5.796e-05	-0.746	-1.9763	0.600288	0.946586	0.238855	-0.707	-1.3978	0.893292	0.964254	0.386953
RAB1A	NP_004152.1	ras-related protein Rab-1A isoform 1 [Homo sapiens]	8.482e-05	6.714e-05	1.581e-05	7.602e-05	5.113e-05	5.196e-05	-0.746	-1.1014	1	0.961301	0.489477	-0.344	-1.0766	1	0.962424	0.492052
RBP1	NP_001124464.1	1 genes:RBP1.NP_001124464.1:retinol-binding protein 1 isoform b [Homo sapiens] ;NP_001124465.1:retinol-binding protein 1 isoform c [Homo sapiens] ;NP_001352869.1:retinol-binding protein 1 isoform d [Homo sapiens] ;NP_002890.2:retinol-binding protein 1 isoform a [Homo sapiens] ;	6.645e-05	0	4.955e-05	0	3.034e-05	5.937e-05	-0.746	-0.1239	1	0.860499	0.784265	6.94	2.1855	0.582142	0.214227	0.971019
HPS3	NP_001295187.1	1 genes:HPS3.NP_001295187.1:Hermansky-Pudlak syndrome 3 protein isoform 2 [Homo sapiens] ;NP_115759.2:Hermansky-Pudlak syndrome 3 protein isoform 1 [Homo sapiens] ;	2.487e-05	6.06e-06	6.18e-06	5.78e-06	1.136e-05	5.55e-06	-0.745	-1.0211	1	0.959152	0.51137	-0.426	-0.535	1	0.926729	0.664825
COG7	NP_705831.1	conserved oligomeric Golgi complex subunit 7 [Homo sapiens]	2.71e-05	0	1.684e-05	0	2.475e-05	1.513e-05	-0.742	-0.1927	1	0.872961	0.766178	7.906	2.5408	0.413888	0.141587	0.950297
PXK	NP_001276024.1	1 genes:PXK.NP_001276024.1:PX domain-containing protein kinase-like protein isoform b [Homo sapiens] ;NP_001276025.1:PX domain-containing protein kinase-like protein isoform c [Homo sapiens] ;NP_001336417.1:PX domain-containing protein kinase-like protein isoform d [Homo sapiens] ;NP_001336418.1:PX domain-containing protein kinase-like protein isoform e [Homo sapiens] ;NP_001336419.1:PX domain-co…	2.471e-05	2.257e-05	9.21e-06	1.292e-05	2.116e-05	1.656e-05	-0.738	-1.957	0.610168	0.947207	0.24214	-0.204	-0.6031	1	0.933792	0.643723
MAB21L1	NP_005575.1	putative nucleotidyltransferase MAB21L1 [Homo sapiens]	7.75e-05	5.309e-05	2.167e-05	4.052e-05	3.318e-05	3.245e-05	-0.738	-1.3127	0.962995	0.964144	0.420711	-0.592	-1.0879	1	0.962755	0.487734
EDEM3	NP_001306889.1	1 genes:EDEM3.NP_001306889.1:ER degradation-enhancing alpha-mannosidase-like protein 3 isoform 1 precursor [Homo sapiens] ;NP_079467.3:ER degradation-enhancing alpha-mannosidase-like protein 3 isoform 2 precursor [Homo sapiens] ;	0	8.04e-06	2.462e-05	0	1.256e-05	9.83e-06	-0.738	-0.2129	1	0.87771	0.758771	6.758	1.7911	0.798504	0.312353	0.988365
TADA1	NP_444281.1	transcriptional adapter 1 [Homo sapiens]	6.229e-05	0	3.097e-05	0	0	0	-0.736	-0.1822	1	0.872957	0.766186	-7.939	-2.2883	0.423216	0.928454	0.163467
MAPK14	NP_001306.1	1 genes:MAPK14.NP_001306.1:mitogen-activated protein kinase 14 isoform 1 [Homo sapiens] ;NP_620581.1:mitogen-activated protein kinase 14 isoform 2 [Homo sapiens] ;NP_620582.1:mitogen-activated protein kinase 14 isoform 3 [Homo sapiens] ;NP_620583.1:mitogen-activated protein kinase 14 isoform 4 [Homo sapiens] ;	0.00010626	1.412e-05	1.441e-05	2.02e-05	4.632e-05	3.236e-05	-0.735	-0.776	1	0.945825	0.590293	-0.022	-0.0227	1	0.84367	0.814312
MOB1B	NP_001231695.1	2 genes:MOB1A,MOB1B.NP_001231695.1:MOB kinase activator 1B isoform 1 [Homo sapiens] ;NP_001231696.1:MOB kinase activator 1B isoform 3 [Homo sapiens] ;NP_001304039.1:MOB kinase activator 1A isoform 2 [Homo sapiens] ;NP_001304040.1:MOB kinase activator 1A isoform 3 [Homo sapiens] ;NP_001304041.1:MOB kinase activator 1A isoform 4 [Homo sapiens] ;NP_060691.2:MOB kinase activator 1A isoform 1 [Homo sa…	9.442e-05	9.199e-05	4.694e-05	4.388e-05	4.311e-05	4.217e-05	-0.734	-2.2977	0.447099	0.930181	0.168273	-0.779	-2.7393	0.254386	0.904394	0.092507
SENP1	NP_001254524.1	sentrin-specific protease 1 [Homo sapiens]	4.32e-05	3.157e-05	1.208e-05	2.635e-05	2.219e-05	2.895e-05	-0.729	-1.4318	0.896626	0.963401	0.383328	-0.368	-1.0589	1	0.96206	0.496383
NEMF	NP_001288661.1	nuclear export mediator factor NEMF isoform 2 [Homo sapiens]	1.978e-05	0	2.46e-06	0	2.26e-06	4.42e-06	-0.728	-0.1971	1	0.87535	0.762491	5.539	1.715	0.842265	0.334961	0.990759
RPRD2	NP_056018.2	regulation of nuclear pre-mRNA domain-containing protein 2 isoform 1 [Homo sapiens]	2.142e-05	2.087e-05	1.065e-05	9.96e-06	9.78e-06	2.073e-05	-0.726	-2.5703	0.336693	0.9164	0.123175	-0.417	-0.9104	1	0.956451	0.544234
PDXK	NP_001317959.1	1 genes:PDXK.NP_001317959.1:pyridoxal kinase isoform 2 [Homo sapiens] ;NP_003672.1:pyridoxal kinase isoform 1 [Homo sapiens] ;	0.00020457	0.00014013	0.00016209	4.456e-05	0.00015764	0.00022273	-0.726	-1.185	1	0.96325	0.459137	0.102	0.2838	1	0.772226	0.884135
ZNF24	NP_008896.2	zinc finger protein 24 isoform 1 [Homo sapiens]	0.00012285	4.387e-05	3.289e-05	3.953e-05	1.726e-05	7.501e-05	-0.725	-1.3559	0.939008	0.964069	0.408111	-0.672	-0.7404	1	0.945575	0.600797
MAP2K3	NP_001303261.1	1 genes:MAP2K3.NP_001303261.1:dual specificity mitogen-activated protein kinase kinase 3 isoform A [Homo sapiens] ;NP_659731.1:dual specificity mitogen-activated protein kinase kinase 3 isoform B [Homo sapiens] ;	4.374e-05	4.795e-05	3.262e-05	1.525e-05	5.244e-05	5.862e-05	-0.724	-1.5921	0.806963	0.9606	0.339342	0.191	0.627	1	0.67526	0.942372
ZRSR2	NP_005080.1	U2 small nuclear ribonucleoprotein auxiliary factor 35 kDa subunit-related protein 2 [Homo sapiens]	4.329e-05	0	0	1.006e-05	0	0	-0.723	-0.1816	1	0.870537	0.769847	-7.182	-2.0675	0.525848	0.940387	0.209911
STUB1	NP_001280126.1	1 genes:STUB1.NP_001280126.1:E3 ubiquitin-protein ligase CHIP isoform b [Homo sapiens] ;NP_005852.2:E3 ubiquitin-protein ligase CHIP isoform a [Homo sapiens] ;	6.022e-05	0	4.491e-05	0	5.156e-05	3.026e-05	-0.721	-0.1612	1	0.868073	0.773492	5.154	1.5268	0.950909	0.390131	0.994095
TSNAX	NP_005990.1	translin-associated protein X [Homo sapiens]	0.00014391	7.886e-05	6.26e-05	4.18e-05	4.928e-05	6.428e-05	-0.719	-1.7081	0.74278	0.957006	0.305139	-0.652	-1.5086	0.829294	0.962385	0.355095
MRPS25	NP_071942.1	28S ribosomal protein S25, mitochondrial [Homo sapiens]	0.00028143	0.00022033	0.00014991	9.809e-05	0.00019277	0.0002155	-0.718	-1.8915	0.644182	0.950215	0.258844	-0.208	-0.5123	1	0.923683	0.67317
AARS	NP_001596.2	alanine--tRNA ligase, cytoplasmic [Homo sapiens]	0.00013652	6.825e-05	7.769e-05	3.005e-05	2.215e-05	6.74e-05	-0.717	-1.2033	1	0.963439	0.45481	-0.953	-1.4296	0.874908	0.963885	0.378871
SNX6	NP_001353448.1	1 genes:SNX6.NP_001353448.1:sorting nexin-6 isoform c [Homo sapiens] ;NP_689419.3:sorting nexin-6 isoform b [Homo sapiens] ;	2.827e-05	2.755e-05	1.406e-05	1.314e-05	1.291e-05	1.263e-05	-0.715	-2.4965	0.364675	0.92002	0.134122	-0.79	-2.6703	0.276562	0.907805	0.1012
SRSF10	NP_001177935.1	1 genes:SRSF10.NP_001177935.1:serine/arginine-rich splicing factor 10 isoform 4 [Homo sapiens] ;NP_001287866.1:serine/arginine-rich splicing factor 10 isoform 9 [Homo sapiens] ;NP_006616.1:serine/arginine-rich splicing factor 10 isoform 1 [Homo sapiens] ;NP_473357.1:serine/arginine-rich splicing factor 10 isoform 2 [Homo sapiens] ;	0.00014072	7.344e-05	4.497e-05	5.605e-05	2.754e-05	5.388e-05	-0.715	-1.7445	0.72288	0.956077	0.297738	-0.944	-1.7865	0.672423	0.95337	0.277432
AGO3	NP_079128.2	protein argonaute-3 isoform a [Homo sapiens]	1.691e-05	6.89e-06	3.52e-06	9.23e-06	1.039e-05	1.301e-05	-0.715	-1.0438	1	0.959638	0.506965	0.104	0.1883	1	0.795576	0.864618
PRKD2	NP_001073350.1	1 genes:PRKD2.NP_001073350.1:serine/threonine-protein kinase D2 isoform A [Homo sapiens] ;NP_001073351.1:serine/threonine-protein kinase D2 isoform B [Homo sapiens] ;	1.188e-05	1.158e-05	5.91e-06	5.52e-06	8.14e-06	7.96e-06	-0.713	-2.1981	0.4921	0.935882	0.190086	-0.354	-1.2726	0.965425	0.965051	0.42812
ZNF598	NP_835461.2	E3 ubiquitin-protein ligase ZNF598 [Homo sapiens]	5.001e-05	1.687e-05	1.148e-05	1.877e-05	7.91e-06	1.547e-05	-0.713	-1.2413	1	0.963863	0.441956	-0.9	-1.3479	0.922116	0.964793	0.403246
EFEMP1	NP_001034437.1	EGF-containing fibulin-like extracellular matrix protein 1 precursor [Homo sapiens]	1.411e-05	3.093e-05	1.052e-05	9.83e-06	0	1.418e-05	-0.711	-1.4858	0.866388	0.962837	0.371094	-7.175	-2.2671	0.432527	0.929888	0.168529
EHBP1L1	NP_001092879.1	1 genes:EHBP1L1.NP_001092879.1:EH domain-binding protein 1-like protein 1 isoform 1 [Homo sapiens] ;NP_001338016.1:EH domain-binding protein 1-like protein 1 isoform 2 [Homo sapiens] ;	6.85e-06	1.001e-05	5.11e-06	3.18e-06	6.26e-06	4.59e-06	-0.709	-1.733	0.729152	0.956551	0.301412	-0.425	-1.1632	1	0.964263	0.461972
DOK1	NP_001305796.1	1 genes:DOK1.NP_001305796.1:docking protein 1 isoform c [Homo sapiens] ;NP_001372.1:docking protein 1 isoform a [Homo sapiens] ;	8.879e-05	2.703e-05	2.759e-05	2.063e-05	2.534e-05	1.983e-05	-0.709	-1.1587	1	0.962809	0.467773	-0.725	-1.1749	1	0.964435	0.457711
RBM34	NP_001333667.1	1 genes:RBM34.NP_001333667.1:RNA-binding protein 34 isoform 3 [Homo sapiens] ;NP_055829.2:RNA-binding protein 34 isoform 1 [Homo sapiens] ;	2.432e-05	2.369e-05	1.209e-05	1.13e-05	2.221e-05	0	-0.707	-2.5149	0.357564	0.919294	0.131876	-6.44	-1.686	0.728186	0.957406	0.305904
GNL1	NP_005266.2	guanine nucleotide-binding protein-like 1 [Homo sapiens]	6.302e-05	3.349e-05	1.709e-05	2.796e-05	3.139e-05	3.455e-05	-0.707	-1.3146	0.961943	0.964145	0.420705	-0.324	-0.7376	1	0.945572	0.600803
ZNF512B	NP_065764.1	zinc finger protein 512B [Homo sapiens]	6.238e-05	1.424e-05	1.454e-05	1.359e-05	1.602e-05	1.567e-05	-0.706	-0.9135	1	0.95436	0.546485	-0.613	-0.894	1	0.955782	0.548606
PPP1R14B	NP_619634.1	protein phosphatase 1 regulatory subunit 14B [Homo sapiens]	0.00046569	0.00031116	0.00019994	0.00016963	0.00012964	0.00026102	-0.703	-1.4293	0.898026	0.963564	0.387389	-0.721	-1.4567	0.859244	0.963448	0.370875
UBP1	NP_001121632.1	1 genes:UBP1.NP_001121632.1:upstream-binding protein 1 isoform LBP-1a [Homo sapiens] ;NP_055332.3:upstream-binding protein 1 isoform LBP-1b [Homo sapiens] ;	3.45e-05	0.00010084	1.544e-05	5.772e-05	0	2.312e-05	-0.702	-0.9124	1	0.954359	0.546489	-8.632	-3.1098	0.156786	0.886869	0.053759
NUDCD1	NP_001121683.1	1 genes:NUDCD1.NP_001121683.1:nudC domain-containing protein 1 isoform 2 [Homo sapiens] ;NP_116258.2:nudC domain-containing protein 1 isoform 1 [Homo sapiens] ;	5.65e-05	3.669e-05	1.872e-05	2.626e-05	3.87e-05	4.627e-05	-0.699	-1.8556	0.663122	0.951928	0.26916	-0.091	-0.2465	1	0.886005	0.753128
GPATCH4	NP_056405.2	1 genes:GPATCH4.NP_056405.2:G patch domain-containing protein 4 isoform 1 [Homo sapiens] ;NP_872620.1:G patch domain-containing protein 4 isoform 2 [Homo sapiens] ;	6.492e-05	4.743e-05	1.383e-05	5.172e-05	3.176e-05	4.971e-05	-0.699	-1.0979	1	0.961296	0.48948	-0.314	-0.7394	1	0.945574	0.600799
PDXDC1	NP_001272376.1	1 genes:PDXDC1.NP_001272376.1:pyridoxal-dependent decarboxylase domain-containing protein 1 isoform 4 [Homo sapiens] ;NP_001310948.1:pyridoxal-dependent decarboxylase domain-containing protein 1 isoform 8 [Homo sapiens] ;NP_055842.2:pyridoxal-dependent decarboxylase domain-containing protein 1 isoform 1 [Homo sapiens] ;	4.049e-05	1.644e-05	1.677e-05	9.41e-06	1.849e-05	3.919e-05	-0.699	-1.0847	1	0.96092	0.493844	0.083	0.1398	1	0.808309	0.852766
TRMT112	NP_001273011.1	1 genes:TRMT112.NP_001273011.1:multifunctional methyltransferase subunit TRM112-like protein isoform 2 [Homo sapiens] ;NP_057488.1:multifunctional methyltransferase subunit TRM112-like protein isoform 1 [Homo sapiens] ;	0.00034777	0.00012706	8.645e-05	0.00012121	7.94e-05	9.709e-05	-0.698	-1.3628	0.935164	0.964002	0.403969	-0.898	-1.5366	0.813181	0.961765	0.347309
PWP1	NP_008993.1	periodic tryptophan protein 1 homolog isoform 1 [Homo sapiens]	9.718e-05	0.00017752	7.247e-05	5.323e-05	9.034e-05	8.372e-05	-0.697	-1.2254	1	0.963743	0.446246	-0.439	-1.1336	1	0.963849	0.470541
NUDT16	NP_689608.2	U8 snoRNA-decapping enzyme isoform 2 [Homo sapiens]	0.00010701	3.909e-05	2.66e-05	3.73e-05	8.551e-05	7.17e-05	-0.697	-0.9592	1	0.956365	0.533295	0.23	0.3675	1	0.751194	0.899589
RSBN1	NP_060834.2	lysine-specific demethylase 9 [Homo sapiens]	2.168e-05	2.535e-05	8.08e-06	1.663e-05	0	1.162e-05	-0.696	-1.9811	0.597841	0.945954	0.235646	-8.054	-2.3775	0.385364	0.923413	0.146523
CIZ1	NP_001124488.1	1 genes:CIZ1.NP_001124488.1:cip1-interacting zinc finger protein isoform 1 [Homo sapiens] ;NP_001244904.1:cip1-interacting zinc finger protein isoform 5 [Homo sapiens] ;NP_001244905.1:cip1-interacting zinc finger protein isoform 6 [Homo sapiens] ;	2.324e-05	1.132e-05	5.78e-06	1.08e-05	2.653e-05	1.038e-05	-0.696	-1.2816	0.980173	0.964093	0.429186	0.007	0.0116	1	0.835242	0.824318
NIF3L1	NP_001356372.1	1 genes:NIF3L1.NP_001356372.1:NIF3-like protein 1 isoform 2 [Homo sapiens] ;NP_001356374.1:NIF3-like protein 1 isoform 1 [Homo sapiens] ;	0.00011924	6.534e-05	4.446e-05	4.156e-05	3.403e-05	6.658e-05	-0.693	-1.8582	0.661744	0.951362	0.265729	-0.617	-1.1106	1	0.963347	0.47912
SRCAP	NP_006653.2	helicase SRCAP [Homo sapiens]	5.81e-06	5.9e-06	1.73e-06	4.77e-06	4.6e-06	6.88e-06	-0.692	-1.4095	0.909102	0.963698	0.391515	-0.027	-0.0771	1	0.854469	0.80058
SERPINB6	NP_001182220.2	serpin B6 isoform b [Homo sapiens]	0.00039353	0.00016718	0.00016325	9.569e-05	0.00012537	0.00014717	-0.692	-1.2356	1	0.963749	0.446211	-0.612	-1.1609	1	0.964261	0.46198
BIRC5	NP_001012270.1	1 genes:BIRC5.NP_001012270.1:baculoviral IAP repeat-containing protein 5 isoform 2 [Homo sapiens] ;NP_001012271.1:baculoviral IAP repeat-containing protein 5 isoform 3 [Homo sapiens] ;NP_001159.2:baculoviral IAP repeat-containing protein 5 isoform 1 [Homo sapiens] ;	0	3.71e-05	0	7.078e-05	3.477e-05	3.402e-05	-0.69	-0.1523	1	0.865584	0.777108	6.731	1.5166	0.956769	0.394198	0.994195
GOLGA5	NP_005104.4	golgin subfamily A member 5 [Homo sapiens]	2.379e-05	1.738e-05	1.064e-05	9.95e-06	6.52e-06	6.38e-06	-0.688	-2.1755	0.502636	0.936581	0.192961	-1.17	-3.1154	0.155572	0.886869	0.053748
LRRFIP1	NP_001131025.1	leucine-rich repeat flightless-interacting protein 1 isoform 5 [Homo sapiens]	9.285e-05	6.758e-05	3.793e-05	3.868e-05	5.375e-05	8.366e-05	-0.687	-1.3244	0.956511	0.964137	0.416509	-0.142	-0.326	1	0.898691	0.72992
RUFY3	NP_001032519.1	protein RUFY3 isoform 1 [Homo sapiens]	1.122e-05	0	8.37e-06	0	0	0	-0.687	-0.2227	1	0.877716	0.758766	-6.82	-1.7284	0.704491	0.955465	0.291518
TENM3	NP_001073946.1	teneurin-3 [Homo sapiens]	0	1.88e-06	0	2.69e-06	0	1.73e-06	-0.687	-0.1744	1	0.870533	0.769849	-0.867	-0.219	1	0.881512	0.760692
REXO4	NP_001266278.1	1 genes:REXO4.NP_001266278.1:RNA exonuclease 4 isoform 2 [Homo sapiens] ;NP_065118.2:RNA exonuclease 4 isoform 1 [Homo sapiens] ;	0.00015302	6.099e-05	6.224e-05	3.879e-05	7.623e-05	6.524e-05	-0.685	-1.1738	1	0.963042	0.463442	-0.337	-0.6081	1	0.933795	0.643714
FANCA	NP_000126.2	1 genes:FANCA.NP_000126.2:Fanconi anemia group A protein isoform a [Homo sapiens] ;NP_001273096.1:Fanconi anemia group A protein isoform c [Homo sapiens] ;	4.78e-06	0	7.13e-06	0	6.55e-06	3.2e-06	-0.685	-0.1815	1	0.870537	0.769847	6.047	1.9186	0.726192	0.279861	0.983874
PDE1C	NP_001177986.1	1 genes:PDE1C.NP_001177986.1:calcium/calmodulin-dependent 3',5'-cyclic nucleotide phosphodiesterase 1C isoform 2 [Homo sapiens] ;NP_001177987.2:calcium/calmodulin-dependent 3',5'-cyclic nucleotide phosphodiesterase 1C isoform 3 [Homo sapiens] ;NP_001308987.1:calcium/calmodulin-dependent 3',5'-cyclic nucleotide phosphodiesterase 1C isoform 4 [Homo sapiens] ;NP_001308988.1:calcium/calmodulin-depend…	3.924e-05	3.584e-05	2.56e-05	1.368e-05	3.024e-05	1.315e-05	-0.682	-1.3995	0.91469	0.963821	0.395633	-0.635	-1.1815	1	0.964441	0.457697
UHRF1	NP_001276980.1	E3 ubiquitin-protein ligase UHRF1 isoform 1 [Homo sapiens]	0.00010087	9.613e-05	3.924e-05	6.42e-05	6.332e-05	2.645e-05	-0.681	-1.8588	0.661426	0.951362	0.265725	-0.882	-1.6455	0.75102	0.958743	0.316949
ZFYVE1	NP_001268663.1	1 genes:ZFYVE1.NP_001268663.1:zinc finger FYVE domain-containing protein 1 isoform 3 [Homo sapiens] ;NP_067083.1:zinc finger FYVE domain-containing protein 1 isoform 1 [Homo sapiens] ;	2.735e-05	1.332e-05	6.8e-06	1.271e-05	1.249e-05	1.222e-05	-0.679	-1.3557	0.93912	0.964069	0.408111	-0.414	-1.0146	1	0.960834	0.509403
REST	NP_001350382.1	RE1-silencing transcription factor [Homo sapiens]	1.902e-05	4.63e-06	4.73e-06	4.42e-06	6.51e-06	6.37e-06	-0.679	-0.9831	1	0.957559	0.52452	-0.379	-0.332	1	0.898696	0.729916
CDK13	NP_003709.3	cyclin-dependent kinase 13 isoform 1 [Homo sapiens]	4.541e-05	5.415e-05	1.647e-05	3.947e-05	3.74e-05	2.873e-05	-0.677	-1.352	0.941178	0.964067	0.408125	-0.419	-1.3308	0.931975	0.964881	0.407377
AKAP12	NP_001357275.1	1 genes:AKAP12.NP_001357275.1:A-kinase anchor protein 12 isoform 3 [Homo sapiens] ;NP_005091.2:A-kinase anchor protein 12 isoform 1 [Homo sapiens] ;NP_653080.1:A-kinase anchor protein 12 isoform 2 [Homo sapiens] ;	1.452e-05	7.58e-06	9.28e-06	4.34e-06	1.278e-05	1.806e-05	-0.677	-0.6964	1	0.939266	0.616329	0.401	0.9174	1	0.584359	0.973942
KCTD10	NP_001304324.1	1 genes:KCTD10.NP_001304324.1:BTB/POZ domain-containing adapter for CUL3-mediated RhoA degradation protein 3 isoform 1 [Homo sapiens] ;NP_001304328.1:BTB/POZ domain-containing adapter for CUL3-mediated RhoA degradation protein 3 isoform 3 [Homo sapiens] ;NP_114160.1:BTB/POZ domain-containing adapter for CUL3-mediated RhoA degradation protein 3 isoform 2 [Homo sapiens] ;	6.645e-05	3.237e-05	1.652e-05	3.088e-05	0	3.71e-05	-0.674	-1.3147	0.961888	0.964145	0.420705	-7.705	-2.0366	0.541161	0.941732	0.215881
RPUSD2	NP_689473.1	RNA pseudouridylate synthase domain-containing protein 2 isoform 1 [Homo sapiens]	1.276e-05	0	9.52e-06	0	8.74e-06	8.55e-06	-0.672	-0.1871	1	0.872958	0.766181	6.369	1.9103	0.730847	0.279835	0.983878
HECTD1	NP_056197.3	E3 ubiquitin-protein ligase HECTD1 [Homo sapiens]	1.999e-05	1.168e-05	1.093e-05	5.57e-06	2.74e-06	1.875e-05	-0.67	-1.4394	0.892374	0.963405	0.383297	-0.689	-0.7524	1	0.946584	0.596469
DYNLT1	NP_001278532.1	1 genes:DYNLT1.NP_001278532.1:dynein light chain Tctex-type 1 isoform 3 [Homo sapiens] ;NP_006510.1:dynein light chain Tctex-type 1 isoform 1 [Homo sapiens] ;	0.00025447	0.00012396	9.488e-05	8.869e-05	5.81e-05	5.683e-05	-0.67	-1.3062	0.966591	0.964136	0.424919	-1.105	-1.1602	1	0.964261	0.461983
PRRC2A	NP_004629.3	protein PRRC2A [Homo sapiens]	3.819e-05	2.241e-05	1.603e-05	1.451e-05	2.74e-05	3.642e-05	-0.668	-1.6136	0.794997	0.95989	0.331611	0.08	0.2129	1	0.78904	0.870355
MORC2	NP_001290185.1	1 genes:MORC2.NP_001290185.1:ATPase MORC2 isoform 1 [Homo sapiens] ;NP_001290186.1:ATPase MORC2 isoform 2 [Homo sapiens] ;NP_055756.1:ATPase MORC2 isoform 3 [Homo sapiens] ;	2.022e-05	1.724e-05	1.005e-05	9.4e-06	1.847e-05	4.52e-06	-0.666	-1.8645	0.658408	0.951364	0.265702	-0.724	-1.0898	1	0.962757	0.487732
THBS1	NP_003237.2	thrombospondin-1 precursor [Homo sapiens]	0.00018726	0.0001781	0.00012634	7.045e-05	0.00013234	7.767e-05	-0.666	-1.5976	0.803899	0.96025	0.335487	-0.569	-1.5137	0.826355	0.962389	0.355086
TSC2	NP_000539.2	1 genes:TSC2.NP_000539.2:tuberin isoform 1 [Homo sapiens] ;NP_001070651.1:tuberin isoform 4 [Homo sapiens] ;NP_001107854.1:tuberin isoform 5 [Homo sapiens] ;NP_001305756.1:tuberin isoform 6 [Homo sapiens] ;NP_001305758.1:tuberin isoform 7 [Homo sapiens] ;NP_001305760.1:tuberin isoform 8 [Homo sapiens] ;NP_001305761.1:tuberin isoform 9 [Homo sapiens] ;NP_001350457.1:tuberin isoform 10 [Homo sapien…	7.7e-06	5.63e-06	2.87e-06	4.02e-06	2.64e-06	6.45e-06	-0.662	-1.674	0.761539	0.95832	0.316335	-0.417	-0.71	1	0.94346	0.609449
HCFC2	NP_037452.1	host cell factor 2 [Homo sapiens]	8.78e-06	1.604e-05	6.55e-06	6.12e-06	6.02e-06	8.83e-06	-0.66	-1.6822	0.757019	0.957892	0.312591	-0.431	-0.9649	1	0.958854	0.526793
RRP7A	NP_056518.2	ribosomal RNA-processing protein 7 homolog A [Homo sapiens]	3.726e-05	9.075e-05	3.705e-05	2.597e-05	4.254e-05	0.00010818	-0.66	-0.923	1	0.95437	0.54647	0.199	0.2961	1	0.768783	0.886794
AKT1S1	NP_001092103.1	1 genes:AKT1S1.NP_001092103.1:proline-rich AKT1 substrate 1 isoform b [Homo sapiens] ;NP_115751.3:proline-rich AKT1 substrate 1 isoform a [Homo sapiens] ;	6.792e-05	1.985e-05	2.026e-05	1.894e-05	2.791e-05	3.641e-05	-0.659	-0.9366	1	0.955065	0.542077	-0.126	-0.2217	1	0.881513	0.76069
VPS4A	NP_037377.1	vacuolar protein sorting-associated protein 4A [Homo sapiens]	0.00024073	0.00014256	9.644e-05	9.153e-05	9.812e-05	0.00011476	-0.657	-1.5286	0.842426	0.961835	0.355105	-0.529	-1.2855	0.958029	0.965057	0.423941
PPP1R7	NP_001269341.1	1 genes:PPP1R7.NP_001269341.1:protein phosphatase 1 regulatory subunit 7 isoform 5 [Homo sapiens] ;NP_002703.1:protein phosphatase 1 regulatory subunit 7 isoform 1 [Homo sapiens] ;	7.077e-05	7.387e-05	6.031e-05	2.114e-05	9.002e-05	0.00011515	-0.657	-1.1134	1	0.96165	0.485119	0.337	1.0862	1	0.528872	0.985398
RRAGC	NP_001258780.1	2 genes:RRAGC,RRAGD.NP_001258780.1:ras-related GTP-binding protein C isoform 2 [Homo sapiens] ;NP_067067.1:ras-related GTP-binding protein D [Homo sapiens] ;NP_071440.1:ras-related GTP-binding protein C isoform 1 [Homo sapiens] ;	3.811e-05	2.785e-05	1.421e-05	1.993e-05	1.958e-05	1.277e-05	-0.655	-1.7932	0.696489	0.954078	0.28328	-0.691	-1.7956	0.667446	0.952822	0.273993
TPM3	NP_001036816.1	tropomyosin alpha-3 chain isoform Tpm3.2cy [Homo sapiens]	0.00018931	9.478e-05	9.673e-05	5.621e-05	0.00010085	9.161e-05	-0.65	-1.4304	0.89741	0.963566	0.387388	-0.363	-0.9233	1	0.957092	0.539874
CMAS	NP_061156.1	N-acylneuraminate cytidylyltransferase [Homo sapiens]	0.00023238	9.954e-05	6.573e-05	0.00010054	0.00010977	0.00010201	-0.648	-1.2266	1	0.963743	0.44624	-0.381	-0.8276	1	0.952028	0.570405
YBX3	NP_003642.3	Y-box-binding protein 3 isoform a [Homo sapiens]	7.973e-05	4.941e-05	3.497e-05	3.067e-05	1.281e-05	2.673e-05	-0.645	-1.765	0.711737	0.955097	0.290474	-1.206	-2.6987	0.267276	0.906432	0.097651
DDX24	NP_065147.1	ATP-dependent RNA helicase DDX24 [Homo sapiens]	0.00014575	0.00014791	7.246e-05	7.902e-05	4.992e-05	8.68e-05	-0.644	-2.2188	0.482552	0.93447	0.184481	-0.764	-2.0413	0.538818	0.941733	0.215866
PARN	NP_001127949.1	1 genes:PARN.NP_001127949.1:poly(A)-specific ribonuclease PARN isoform 2 [Homo sapiens] ;NP_002573.1:poly(A)-specific ribonuclease PARN isoform 1 [Homo sapiens] ;	9.025e-05	3.517e-05	3.141e-05	2.517e-05	9.891e-05	4.031e-05	-0.644	-1.1545	1	0.962561	0.47208	0.062	0.0853	1	0.820578	0.840421
HSPG2	NP_001278789.1	1 genes:HSPG2.NP_001278789.1:basement membrane-specific heparan sulfate proteoglycan core protein isoform a precursor [Homo sapiens] ;NP_005520.4:basement membrane-specific heparan sulfate proteoglycan core protein isoform b precursor [Homo sapiens] ;	1.109e-05	1.562e-05	7.68e-06	6.62e-06	8.68e-06	6.37e-06	-0.643	-1.6131	0.795275	0.95989	0.331613	-0.555	-0.9501	1	0.958292	0.531154
UFC1	NP_057490.2	ubiquitin-fold modifier-conjugating enzyme 1 [Homo sapiens]	0.00033319	7.608e-05	0.0001087	5.807e-05	2.853e-05	6.976e-05	-0.641	-0.8615	1	0.951298	0.564037	-1.29	-1.5757	0.790756	0.960729	0.335778
RANBP6	NP_001230131.1	ran-binding protein 6 isoform 2 [Homo sapiens]	9.37e-06	0	7.01e-06	0	9.6e-06	1.578e-05	-0.64	-0.1844	1	0.872958	0.766183	6.885	2.1381	0.606794	0.223435	0.973145
CBR3	NP_001227.1	carbonyl reductase [NADPH] 3 [Homo sapiens]	0.00022202	0.00011008	8.239e-05	8.752e-05	6.88e-05	9.941e-05	-0.639	-1.5574	0.826324	0.961245	0.347195	-0.611	-1.461	0.856758	0.963452	0.370869
GMPPA	NP_001361224.1	mannose-1-phosphate guanyltransferase alpha [Homo sapiens]	0.00020701	4.84e-05	5.557e-05	4.618e-05	2.836e-05	9.431e-05	-0.639	-0.8705	1	0.952104	0.559664	-0.491	-0.5135	1	0.923684	0.673168
BYSL	NP_004044.3	bystin [Homo sapiens]	0.00015916	8.722e-05	6.528e-05	6.102e-05	4.906e-05	5.865e-05	-0.638	-1.539	0.836609	0.961841	0.355072	-0.752	-1.9547	0.582778	0.945653	0.234368
TFG	NP_001182408.1	1 genes:TFG.NP_001182408.1:protein TFG isoform 2 [Homo sapiens] ;NP_006061.2:protein TFG isoform 1 [Homo sapiens] ;	0.00018442	8.984e-05	7.859e-05	6.122e-05	0.00010828	0.00010591	-0.638	-1.3751	0.928309	0.96401	0.40393	-0.168	-0.3852	1	0.906494	0.714044
GLG1	NP_001139138.1	Golgi apparatus protein 1 isoform 2 precursor [Homo sapiens]	3.501e-05	2.132e-05	2.176e-05	1.017e-05	3.397e-05	4.301e-05	-0.638	-1.2267	1	0.963743	0.446239	0.332	0.8389	1	0.609665	0.966898
TPD52L2	NP_955391.1	tumor protein D54 isoform f [Homo sapiens]	0.00031785	0.00019127	0.00017429	9.123e-05	0.00033298	0.00026308	-0.638	-1.217	1	0.963603	0.450512	0.176	0.4859	1	0.718042	0.920516
DNAJB1	NP_006136.1	dnaJ homolog subfamily B member 1 isoform 1 [Homo sapiens]	0.00020457	0.00015695	0.00011441	7.13e-05	0.00018916	0.00023987	-0.636	-1.3786	0.926357	0.963919	0.3998	0.158	0.5039	1	0.710429	0.9248
KMT2B	NP_055542.1	histone-lysine N-methyltransferase 2B [Homo sapiens]	5.12e-06	4.68e-06	1.91e-06	3.57e-06	0	4.29e-06	-0.635	-1.6181	0.792496	0.959893	0.331595	-4.677	-1.0217	1	0.960841	0.509387
CSTB	NP_000091.1	cystatin-B [Homo sapiens]	0.00092266	0.00057045	0.00047633	0.00029684	0.00043752	0.00052309	-0.634	-1.4224	0.901887	0.963559	0.387405	-0.391	-1.031	1	0.961269	0.505053
STAT1	NP_009330.1	1 genes:STAT1.NP_009330.1:signal transducer and activator of transcription 1-alpha/beta isoform alpha [Homo sapiens] ;NP_644671.1:signal transducer and activator of transcription 1-alpha/beta isoform beta [Homo sapiens] ;	0.00011592	5.421e-05	4.149e-05	4.202e-05	5.082e-05	4.971e-05	-0.634	-1.3082	0.965484	0.964143	0.420732	-0.427	-0.5913	1	0.932444	0.647962
CEP170B	NP_001106197.1	1 genes:CEP170B.NP_001106197.1:centrosomal protein of 170 kDa protein B isoform 1 [Homo sapiens] ;NP_055820.2:centrosomal protein of 170 kDa protein B isoform 2 [Homo sapiens] ;	4.48e-06	0	3.34e-06	0	9.2e-06	1.2e-05	-0.634	-0.1666	1	0.868076	0.77349	7.027	1.745	0.824977	0.327362	0.990016
ECT2	NP_001245244.1	1 genes:ECT2.NP_001245244.1:protein ECT2 isoform a [Homo sapiens] ;NP_001336025.1:protein ECT2 isoform c [Homo sapiens] ;NP_001336026.1:protein ECT2 isoform d [Homo sapiens] ;NP_001336030.1:protein ECT2 isoform e [Homo sapiens] ;NP_001336031.1:protein ECT2 isoform f [Homo sapiens] ;NP_001336032.1:protein ECT2 isoform g [Homo sapiens] ;NP_060568.3:protein ECT2 isoform b [Homo sapiens] ;	2.283e-05	8.34e-06	8.51e-06	5.3e-06	0	1.53e-05	-0.633	-1.1454	1	0.962553	0.472103	-7.232	-1.9784	0.570586	0.945016	0.231195
YEATS2	NP_001338299.1	1 genes:YEATS2.NP_001338299.1:YEATS domain-containing protein 2 isoform 1 [Homo sapiens] ;NP_060493.3:YEATS domain-containing protein 2 isoform 3 [Homo sapiens] ;	1.466e-05	7.14e-06	3.64e-06	8.52e-06	8.37e-06	8.19e-06	-0.632	-0.9902	1	0.957566	0.524507	-0.158	-0.3269	1	0.898692	0.729919
GMEB2	NP_036516.1	glucocorticoid modulatory element-binding protein 2 [Homo sapiens]	5.249e-05	4.315e-05	2.796e-05	2.287e-05	1.348e-05	3.078e-05	-0.63	-1.971	0.602994	0.946584	0.23887	-0.841	-1.7157	0.711564	0.955964	0.295086
GSR	NP_000628.2	1 genes:GSR.NP_000628.2:glutathione reductase, mitochondrial isoform 1 precursor [Homo sapiens] ;NP_001182031.1:glutathione reductase, mitochondrial isoform 2 [Homo sapiens] ;	5.996e-05	2.921e-05	1.987e-05	2.322e-05	1.369e-05	0.00010267	-0.63	-1.3556	0.939175	0.964069	0.408111	-0.018	-0.0201	1	0.843669	0.814312
ASAH1	NP_004306.3	1 genes:ASAH1.NP_004306.3:acid ceramidase isoform b [Homo sapiens] ;NP_808592.2:acid ceramidase isoform a preproprotein [Homo sapiens] ;	0.00022846	0.00017312	9.465e-05	0.00012387	0.00011592	7.937e-05	-0.629	-1.8817	0.649333	0.950795	0.262254	-0.735	-1.7097	0.714913	0.956457	0.298653
GFPT1	NP_001231639.1	glutamine--fructose-6-phosphate aminotransferase [isomerizing] 1 isoform 1 [Homo sapiens]	0.00015859	6.544e-05	0.00010759	3.121e-05	4.43e-05	8.667e-05	-0.629	-0.9388	1	0.955721	0.537707	-0.498	-0.8413	1	0.952835	0.566046
C20orf24	NP_001186463.1	1 genes:RAB5IF.NP_001186463.1:uncharacterized protein RAB5IF isoform c [Homo sapiens] ;NP_001361107.1:uncharacterized protein RAB5IF isoform d [Homo sapiens] ;NP_061328.1:uncharacterized protein RAB5IF isoform a [Homo sapiens] ;NP_955777.1:uncharacterized protein RAB5IF isoform b [Homo sapiens] ;	0	3.71e-05	0	3.539e-05	6.955e-05	0	-0.629	-0.1689	1	0.870531	0.769854	1.479	0.3862	1	0.743983	0.904479
ZNFX1	NP_066363.1	NFX1-type zinc finger-containing protein 1 [Homo sapiens]	0	3.97e-06	2.7e-06	0	0	6.07e-06	-0.629	-0.1552	1	0.868072	0.773497	-0.118	-0.0297	1	0.846416	0.810923
PI4KB	NP_001185702.1	1 genes:PI4KB.NP_001185702.1:phosphatidylinositol 4-kinase beta isoform 2 [Homo sapiens] ;NP_001356552.1:phosphatidylinositol 4-kinase beta isoform 5 [Homo sapiens] ;NP_001356554.1:phosphatidylinositol 4-kinase beta isoform 6 [Homo sapiens] ;NP_001356555.1:phosphatidylinositol 4-kinase beta isoform 7 [Homo sapiens] ;NP_001356557.1:phosphatidylinositol 4-kinase beta isoform 8 [Homo sapiens] ;NP_00…	2.171e-05	1.903e-05	9.71e-06	1.211e-05	0	5.82e-06	-0.628	-2.2344	0.475424	0.933761	0.181704	-9.005	-3.1597	0.146229	0.885175	0.050494
SPATS2L	NP_001093892.1	1 genes:SPATS2L.NP_001093892.1:SPATS2-like protein isoform a [Homo sapiens] ;NP_001269672.1:SPATS2-like protein isoform c [Homo sapiens] ;NP_001269673.1:SPATS2-like protein isoform d [Homo sapiens] ;	0.00016828	0.00014573	8.83e-05	7.82e-05	0.00017929	0.00011275	-0.627	-2.1139	0.531941	0.940033	0.207589	-0.071	-0.1894	1	0.876887	0.768167
STK25	NP_001258908.1	serine/threonine-protein kinase 25 isoform 2 [Homo sapiens]	7.885e-05	1.521e-05	2.384e-05	1.488e-05	2.73e-05	2.766e-05	-0.626	-0.8114	1	0.947775	0.581547	-0.209	-0.3077	1	0.896658	0.733847
XRN1	NP_001269786.1	5'-3' exoribonuclease 1 isoform c [Homo sapiens]	1.437e-05	4.5e-06	7.65e-06	2.86e-06	9.84e-06	6.88e-06	-0.625	-0.8796	1	0.952112	0.559643	0.08	0.1205	1	0.811421	0.849725
DPY30	NP_001308138.1	protein dpy-30 homolog isoform 1 [Homo sapiens]	0.00108898	0.00056469	0.00044533	0.00039179	0.00036092	0.00056488	-0.623	-1.4887	0.864765	0.962605	0.36709	-0.525	-0.9007	1	0.955787	0.548589
NUDT5	NP_001308576.1	1 genes:NUDT5.NP_001308576.1:ADP-sugar pyrophosphatase isoform 2 [Homo sapiens] ;NP_054861.2:ADP-sugar pyrophosphatase isoform 1 [Homo sapiens] ;	0.00054742	0.0001647	0.00024013	0.00010101	7.72e-05	0.00020496	-0.623	-0.9426	1	0.955723	0.537694	-0.88	-1.0994	1	0.963063	0.483423
TBCB	NP_001272.2	1 genes:TBCB.NP_001272.2:tubulin-folding cofactor B isoform 1 [Homo sapiens] ;NP_001287900.1:tubulin-folding cofactor B isoform 2 [Homo sapiens] ;	0.00025655	0.0001458	0.00010629	9.935e-05	8.786e-05	6.685e-05	-0.622	-1.4281	0.898698	0.963563	0.38739	-0.916	-2.1428	0.489474	0.936259	0.192674
EIF3L	NP_001229852.1	1 genes:EIF3L.NP_001229852.1:eukaryotic translation initiation factor 3 subunit L isoform 2 [Homo sapiens] ;NP_057175.1:eukaryotic translation initiation factor 3 subunit L isoform 1 [Homo sapiens] ;	0.00028307	0.00017729	0.0001156	0.00011745	0.00012926	0.00013547	-0.621	-1.6042	0.800226	0.960252	0.335461	-0.517	-1.4584	0.858261	0.963449	0.370872
ASPSCR1	NP_001238817.1	tether containing UBX domain for GLUT4 isoform 2 [Homo sapiens]	1.075e-05	0	0	1.873e-05	0	0	-0.62	-0.156	1	0.868072	0.773496	-7.302	-2.0873	0.516152	0.939024	0.204083
ARMC9	NP_001258395.2	lisH domain-containing protein ARMC9 isoform 1 [Homo sapiens]	4.251e-05	4.66e-05	3.804e-05	1.482e-05	2.038e-05	3.418e-05	-0.618	-1.4056	0.91128	0.963696	0.391532	-0.51	-1.346	0.923212	0.964792	0.403254
STARD7	NP_064536.2	stAR-related lipid transfer protein 7, mitochondrial precursor [Homo sapiens]	3.76e-05	3.434e-05	1.402e-05	2.621e-05	1.288e-05	3.779e-05	-0.615	-1.5395	0.836329	0.961842	0.355071	-0.408	-0.6561	1	0.938873	0.626655
UTP14A	NP_001159693.1	1 genes:UTP14A.NP_001159693.1:U3 small nucleolar RNA-associated protein 14 homolog A isoform 2 [Homo sapiens] ;NP_006640.2:U3 small nucleolar RNA-associated protein 14 homolog A isoform 1 [Homo sapiens] ;	7.255e-05	4.594e-05	2.525e-05	3.709e-05	1.325e-05	1.944e-05	-0.615	-1.3958	0.916757	0.963818	0.395643	-1.285	-3.2322	0.131891	0.881906	0.044463
RNASEH1	NP_001273763.1	1 genes:RNASEH1.NP_001273763.1:ribonuclease H1 isoform 2 [Homo sapiens] ;NP_002927.2:ribonuclease H1 isoform 1 precursor [Homo sapiens] ;	4.013e-05	6.841e-05	1.995e-05	4.662e-05	4.581e-05	5.377e-05	-0.613	-0.7468	1	0.94376	0.599007	-0.039	-0.1037	1	0.859677	0.793554
RBM17	NP_116294.1	splicing factor 45 [Homo sapiens]	5.204e-05	0	1.94e-05	0	0	2.324e-05	-0.613	-0.1693	1	0.870531	0.769853	0.007	0.0021	1	0.838082	0.821011
LAMTOR3	NP_068805.1	ragulator complex protein LAMTOR3 isoform 1 [Homo sapiens]	0.00030851	0.00024591	0.00012549	0.00017595	0.00034578	0.0002255	-0.612	-1.7062	0.743822	0.957005	0.305149	0.032	0.0851	1	0.820578	0.840421
ZNF207	NP_001027464.1	1 genes:ZNF207.NP_001027464.1:BUB3-interacting and GLEBS motif-containing protein ZNF207 isoform b [Homo sapiens] ;NP_001091977.1:BUB3-interacting and GLEBS motif-containing protein ZNF207 isoform c [Homo sapiens] ;NP_003448.1:BUB3-interacting and GLEBS motif-containing protein ZNF207 isoform a [Homo sapiens] ;	0.00023285	0.00016465	0.00011202	9.948e-05	6.688e-05	8.556e-05	-0.612	-1.7016	0.746348	0.957458	0.308832	-0.954	-2.5756	0.309139	0.913392	0.116282
TAF4	NP_003176.2	transcription initiation factor TFIID subunit 4 [Homo sapiens]	2.244e-05	1.639e-05	1.195e-05	8.94e-06	1.756e-05	1.718e-05	-0.612	-1.6926	0.751293	0.957454	0.308868	-0.138	-0.3488	1	0.902654	0.722028
FAU	NP_001988.1	ubiquitin-like protein fubi and ribosomal protein S30 precursor [Homo sapiens]	5.23e-05	9.553e-05	3.9e-05	3.645e-05	7.164e-05	5.256e-05	-0.611	-1.4595	0.881118	0.963037	0.37518	-0.165	-0.4085	1	0.910191	0.706001
RBM12B	NP_976324.2	RNA-binding protein 12B [Homo sapiens]	3.127e-05	2.792e-05	1.036e-05	2.422e-05	1.666e-05	2.793e-05	-0.611	-1.3262	0.955513	0.964138	0.416501	-0.299	-0.7606	1	0.947562	0.592147
RPS27A	NP_001170884.1	ubiquitin-40S ribosomal protein S27a precursor [Homo sapiens]	0.00035669	6.516e-05	0.00010449	5.994e-05	8.398e-05	6.273e-05	-0.611	-0.7859	1	0.945835	0.590278	-0.765	-1.0091	1	0.960385	0.513732
FPGS	NP_001018088.1	1 genes:FPGS.NP_001018088.1:folylpolyglutamate synthase, mitochondrial isoform b [Homo sapiens] ;NP_001275732.1:folylpolyglutamate synthase, mitochondrial isoform c precursor [Homo sapiens] ;NP_004948.4:folylpolyglutamate synthase, mitochondrial isoform a precursor [Homo sapiens] ;	2.59e-05	0	9.66e-06	0	8.87e-06	2.17e-05	-0.611	-0.1711	1	0.870532	0.769852	6.656	1.4508	0.994381	0.414674	0.9944
PARP2	NP_001036083.1	1 genes:PARP2.NP_001036083.1:poly [ADP-ribose] polymerase 2 isoform 2 [Homo sapiens] ;NP_005475.2:poly [ADP-ribose] polymerase 2 isoform 1 [Homo sapiens] ;	1.83e-05	4.012e-05	1.365e-05	1.701e-05	1.672e-05	1.635e-05	-0.61	-1.3805	0.925298	0.963919	0.399792	-0.479	-1.1459	1	0.964066	0.466262
ADH5	NP_000662.3	alcohol dehydrogenase class-3 [Homo sapiens]	0.00020457	4.077e-05	9.708e-05	2.593e-05	7.006e-05	9.968e-05	-0.609	-0.6927	1	0.939263	0.616338	-0.036	-0.037	1	0.846417	0.81092
CFH	NP_000177.2	complement factor H isoform a precursor [Homo sapiens]	1.413e-05	1.858e-05	6.32e-06	1.182e-05	1.161e-05	7.57e-06	-0.608	-1.4775	0.871038	0.96283	0.371111	-0.534	-1.5172	0.82434	0.96208	0.351214
KDM6A	NP_001278344.1	1 genes:KDM6A.NP_001278344.1:lysine-specific demethylase 6A isoform 1 [Homo sapiens] ;NP_001278345.1:lysine-specific demethylase 6A isoform 2 [Homo sapiens] ;NP_001278346.1:lysine-specific demethylase 6A isoform 4 [Homo sapiens] ;NP_001278347.1:lysine-specific demethylase 6A isoform 5 [Homo sapiens] ;NP_001278350.1:lysine-specific demethylase 6A isoform 6 [Homo sapiens] ;NP_066963.2:lysine-specif…	1.197e-05	7e-06	7.14e-06	3.34e-06	9.84e-06	4.81e-06	-0.607	-1.3287	0.954126	0.96414	0.416493	-0.234	-0.4514	1	0.915499	0.693802
EEA1	NP_003557.3	early endosome antigen 1 [Homo sapiens]	6.901e-05	2.881e-05	4.227e-05	1.374e-05	8.44e-06	1.982e-05	-0.605	-0.782	1	0.94583	0.590281	-1.121	-1.5816	0.78738	0.960354	0.332006
FAP	NP_001278736.1	1 genes:FAP.NP_001278736.1:prolyl endopeptidase FAP isoform 2 [Homo sapiens] ;NP_004451.2:prolyl endopeptidase FAP isoform 1 [Homo sapiens] ;	0	6.91e-06	0	6.6e-06	0	0	-0.605	-0.1996	1	0.875351	0.762489	-7.745	-2.2391	0.445007	0.931317	0.173714
ADI1	NP_060739.2	1,2-dihydroxy-3-keto-5-methylthiopentene dioxygenase isoform 1 [Homo sapiens]	9.714e-05	0	2.898e-05	0	2.662e-05	3.905e-05	-0.604	-0.152	1	0.865583	0.777108	6.284	1.9852	0.689163	0.262564	0.980986
C17orf75	NP_071739.2	protein Njmu-R1 [Homo sapiens]	6.147e-05	5.134e-05	2.62e-05	3.673e-05	3.008e-05	3.53e-05	-0.603	-1.8325	0.675411	0.952476	0.272676	-0.535	-1.6589	0.743445	0.958309	0.313246
ARHGEF10	NP_001295081.1	1 genes:ARHGEF10.NP_001295081.1:rho guanine nucleotide exchange factor 10 isoform 2 [Homo sapiens] ;NP_001295082.1:rho guanine nucleotide exchange factor 10 isoform 3 [Homo sapiens] ;NP_055444.2:rho guanine nucleotide exchange factor 10 isoform 1 [Homo sapiens] ;	3.994e-05	1.362e-05	1.787e-05	9.28e-06	5.47e-06	1.606e-05	-0.602	-0.8358	1	0.949594	0.572799	-0.833	-1.0217	1	0.960841	0.509387
PARD3	NP_001171714.1	1 genes:PARD3.NP_001171714.1:partitioning defective 3 homolog isoform 2 [Homo sapiens] ;NP_001171715.1:partitioning defective 3 homolog isoform 3 [Homo sapiens] ;NP_001171716.1:partitioning defective 3 homolog isoform 4 [Homo sapiens] ;NP_001171717.1:partitioning defective 3 homolog isoform 5 [Homo sapiens] ;NP_001171718.1:partitioning defective 3 homolog isoform 6 [Homo sapiens] ;NP_001171719.1:…	3.599e-05	2.817e-05	9.58e-06	3.046e-05	2.641e-05	3.444e-05	-0.601	-1.1568	1	0.962809	0.467782	-0.04	-0.1086	1	0.862231	0.790007
NIPBL	NP_597677.2	nipped-B-like protein isoform A [Homo sapiens]	1.116e-05	9.97e-06	6.47e-06	5.19e-06	1.699e-05	6.65e-06	-0.6	-2.0722	0.552247	0.942054	0.216697	0.014	0.0239	1	0.83524	0.824321
TBCK	NP_001156907.2	1 genes:TBCK.NP_001156907.2:TBC domain-containing protein kinase-like protein isoform a [Homo sapiens] ;NP_149106.3:TBC domain-containing protein kinase-like protein isoform c [Homo sapiens] ;	1.168e-05	1.992e-05	8.71e-06	8.14e-06	1.067e-05	1.044e-05	-0.598	-1.3572	0.938284	0.96407	0.408107	-0.383	-0.961	1	0.958851	0.526805
ACACA	NP_942131.1	1 genes:ACACA.NP_942131.1:acetyl-CoA carboxylase 1 isoform 1 [Homo sapiens] ;NP_942134.1:acetyl-CoA carboxylase 1 isoform 3 [Homo sapiens] ;NP_942135.1:acetyl-CoA carboxylase 1 isoform 4 [Homo sapiens] ;NP_942136.1:acetyl-CoA carboxylase 1 isoform 2 [Homo sapiens] ;	1.751e-05	7.46e-06	1.306e-05	3.05e-06	3e-06	5.87e-06	-0.597	-0.7647	1	0.944809	0.594644	-1.04	-1.6466	0.750397	0.958744	0.316948
SF1	NP_001333293.1	splicing factor 1 isoform 10 [Homo sapiens]	0	2.24e-06	0	4.27e-06	0	6.15e-06	-0.597	-0.1652	1	0.868076	0.773491	0.047	0.0106	1	0.838081	0.821014
URI1	NP_003787.2	unconventional prefoldin RPB5 interactor 1 isoform a [Homo sapiens]	5.85e-05	2.85e-05	2.908e-05	1.813e-05	3.117e-05	4.355e-05	-0.596	-1.3466	0.944181	0.964118	0.412287	-0.075	-0.1492	1	0.869706	0.779198
ASUN	NP_060634.2	integrator complex subunit 13 [Homo sapiens]	1.97e-05	3.959e-05	1.469e-05	1.717e-05	1.35e-05	1.98e-05	-0.595	-1.2944	0.973112	0.964128	0.424956	-0.493	-0.5859	1	0.931072	0.652186
NUTF2	NP_001308968.1	nuclear transport factor 2 [Homo sapiens]	0.00087627	0.0006803	0.00069429	0.00024815	0.00056269	0.00060547	-0.595	-0.9541	1	0.956361	0.533308	-0.29	-0.8918	1	0.955782	0.548615
AKT3	NP_001193658.1	1 genes:AKT3.NP_001193658.1:RAC-gamma serine/threonine-protein kinase isoform 2 [Homo sapiens] ;NP_001357003.1:RAC-gamma serine/threonine-protein kinase isoform 1 [Homo sapiens] ;	4.487e-05	0	2.789e-05	0	4.098e-05	4.51e-05	-0.595	-0.1612	1	0.868073	0.773492	6.251	1.8051	0.790492	0.30866	0.987916
CTPS1	NP_001896.2	CTP synthase 1 isoform a [Homo sapiens]	0.00019805	0.00012842	0.00011284	6.563e-05	5.94e-05	0.00012963	-0.593	-1.4171	0.90485	0.963705	0.391501	-0.618	-1.2231	0.993678	0.964909	0.440767
PTBP1	NP_002810.1	polypyrimidine tract-binding protein 1 isoform a [Homo sapiens]	0.00170427	0.0011451	0.00063787	0.00095751	0.00069708	0.0006526	-0.591	-1.638	0.781449	0.959129	0.323956	-0.703	-2.1019	0.509062	0.938338	0.201189
CDKN2A	NP_000068.1	1 genes:CDKN2A.NP_000068.1:cyclin-dependent kinase inhibitor 2A isoform p16INK4a [Homo sapiens] ;NP_001182061.1:cyclin-dependent kinase inhibitor 2A isoform p16gamma [Homo sapiens] ;	0.00015605	8.145e-05	6.65e-05	6.216e-05	6.108e-05	0.00011949	-0.591	-1.41	0.908822	0.963698	0.391513	-0.285	-0.5906	1	0.932443	0.647964
C19orf66	NP_060851.2	shiftless antiviral inhibitor of ribosomal frameshifting protein isoform 1 [Homo sapiens]	9.561e-05	4.366e-05	3.565e-05	3.332e-05	3.274e-05	2.402e-05	-0.591	-1.2319	1	0.963745	0.446219	-0.802	-1.6848	0.72886	0.957405	0.305905
TUBB	NP_001280141.1	tubulin beta chain isoform a [Homo sapiens]	0.00392683	0.00308067	0.00179676	0.00205574	0.00362727	0.00291256	-0.59	-1.6822	0.757019	0.957892	0.312591	-0.077	-0.2325	1	0.883775	0.756921
CSNK1D	NP_001350678.1	2 genes:CSNK1D,CSNK1E.NP_001350678.1:casein kinase I isoform delta isoform 3 [Homo sapiens] ;NP_001884.2:casein kinase I isoform delta isoform 1 [Homo sapiens] ;NP_620693.1:casein kinase I isoform delta isoform 2 [Homo sapiens] ;NP_689407.1:casein kinase I isoform epsilon [Homo sapiens] ;	4.887e-05	6.546e-05	2.429e-05	3.974e-05	4.463e-05	7.64e-05	-0.59	-1.4299	0.89769	0.963565	0.387388	0.019	0.049	1	0.829467	0.830848
FUBP3	NP_003925.1	far upstream element-binding protein 3 [Homo sapiens]	0.00016128	0.00016667	8.696e-05	9.465e-05	6.919e-05	9.462e-05	-0.587	-1.9364	0.620786	0.948435	0.248732	-0.734	-1.6087	0.771915	0.959571	0.324453
CHCHD2	NP_001307256.1	1 genes:CHCHD2.NP_001307256.1:coiled-coil-helix-coiled-coil-helix domain-containing protein 2 precursor isoform 1 [Homo sapiens] ;NP_057223.1:coiled-coil-helix-coiled-coil-helix domain-containing protein 2 precursor isoform 2 [Homo sapiens] ;	0.00035191	0.00022688	0.00013893	0.00017316	7.089e-05	0.00020805	-0.584	-1.5922	0.806908	0.9606	0.339342	-0.814	-1.12	1	0.963608	0.474834
JMJD1C	NP_001269877.1	1 genes:JMJD1C.NP_001269877.1:probable JmjC domain-containing histone demethylation protein 2C isoform c [Homo sapiens] ;NP_001305082.1:probable JmjC domain-containing histone demethylation protein 2C isoform d [Homo sapiens] ;NP_001309181.1:probable JmjC domain-containing histone demethylation protein 2C isoform e [Homo sapiens] ;NP_001309183.1:probable JmjC domain-containing histone demethylati…	4.42e-06	9.7e-06	6.6e-06	2.06e-06	4.04e-06	0	-0.584	-0.6282	1	0.932938	0.637798	-6.23	-1.5626	0.798258	0.961088	0.339603
PIAS4	NP_056981.2	E3 SUMO-protein ligase PIAS4 [Homo sapiens]	2.046e-05	2.99e-05	2.034e-05	9.51e-06	3.269e-05	9.14e-06	-0.583	-1.3145	0.961998	0.964145	0.420705	-0.34	-0.5078	1	0.923681	0.67318
PUM1	NP_001018494.1	1 genes:PUM1.NP_001018494.1:pumilio homolog 1 isoform 1 [Homo sapiens] ;NP_055491.1:pumilio homolog 1 isoform 2 [Homo sapiens] ;	3.806e-05	1.925e-05	2.62e-05	8.16e-06	1.203e-05	9.81e-06	-0.583	-0.9308	1	0.955057	0.542083	-0.911	-2.1493	0.486399	0.936261	0.192657
LSM3	NP_055278.1	U6 snRNA-associated Sm-like protein LSm3 [Homo sapiens]	0.00027276	0.00054808	0.0002034	0.00023767	0.00070061	0.00047973	-0.582	-1.1929	1	0.963255	0.45911	0.381	0.8098	1	0.618026	0.964295
ZDHHC5	NP_056272.2	palmitoyltransferase ZDHHC5 [Homo sapiens]	9.73e-06	2.488e-05	7.25e-06	1.017e-05	1.333e-05	2.607e-05	-0.581	-1.0709	1	0.960517	0.498213	0.172	0.2547	1	0.779031	0.87872
ZBTB38	NP_001073881.2	zinc finger and BTB domain-containing protein 38 [Homo sapiens]	2.91e-05	2.552e-05	1.302e-05	1.826e-05	2.193e-05	2.535e-05	-0.578	-1.8103	0.687292	0.953555	0.279708	-0.151	-0.514	1	0.923684	0.673168
SRI	NP_001243820.1	1 genes:SRI.NP_001243820.1:sorcin isoform C [Homo sapiens] ;NP_001243821.1:sorcin isoform D [Homo sapiens] ;NP_003121.1:sorcin isoform A [Homo sapiens] ;NP_944490.1:sorcin isoform B [Homo sapiens] ;	5.35e-05	3.909e-05	2.66e-05	2.486e-05	8.551e-05	4.78e-05	-0.578	-1.6876	0.754045	0.957895	0.312574	0.369	0.9269	1	0.580106	0.975007
MORF4L2	NP_001135891.1	mortality factor 4-like protein 2 [Homo sapiens]	8.453e-05	7.059e-05	3.602e-05	5.05e-05	4.963e-05	8.091e-05	-0.578	-1.6105	0.79672	0.95989	0.331626	-0.172	-0.4204	1	0.911991	0.701953
AGGF1	NP_060516.2	angiogenic factor with G patch and FHA domains 1 [Homo sapiens]	0	1.424e-05	1.453e-05	0	1.001e-05	0	-0.575	-0.14	1	0.863059	0.7807	-0.398	-0.1083	1	0.85968	0.793553
TIAL1	NP_003243.1	nucleolysin TIAR isoform 1 [Homo sapiens]	0.00050903	0.0002228	0.00022822	0.00016162	0.0001334	9.072e-05	-0.574	-1.1264	1	0.961977	0.480767	-1.052	-2.0496	0.534692	0.941061	0.212891
PPAT	NP_002694.3	amidophosphoribosyltransferase precursor [Homo sapiens]	3.363e-05	1.966e-05	1.003e-05	1.876e-05	9.21e-06	1.803e-05	-0.574	-0.9922	1	0.958115	0.520148	-0.676	-1.5394	0.811571	0.961767	0.347304
PHKB	NP_000284.1	1 genes:PHKB.NP_000284.1:phosphorylase b kinase regulatory subunit beta isoform a [Homo sapiens] ;NP_001027005.1:phosphorylase b kinase regulatory subunit beta isoform b [Homo sapiens] ;NP_001350766.1:phosphorylase b kinase regulatory subunit beta isoform c [Homo sapiens] ;	6.36e-06	0	4.75e-06	0	0	6.4e-06	-0.574	-0.1595	1	0.868073	0.773493	-1.277	-0.3841	1	0.906492	0.714044
ZNF579	NP_689813.2	zinc finger protein 579 [Homo sapiens]	9.901e-05	6.782e-05	3.692e-05	6.039e-05	4.662e-05	6.219e-05	-0.573	-1.4265	0.899594	0.963561	0.387393	-0.395	-1.0835	1	0.96275	0.487742
CETN2	NP_004335.1	centrin-2 [Homo sapiens]	6.066e-05	8.864e-05	3.016e-05	5.638e-05	8.31e-05	6.774e-05	-0.573	-1.1904	1	0.963253	0.459116	0.048	0.1411	1	0.808309	0.852766
PARK7	NP_009193.2	protein/nucleic acid deglycase DJ-1 [Homo sapiens]	0.00299929	0.00115627	0.00126238	0.00092352	0.00105869	0.00091233	-0.573	-1.0821	1	0.960917	0.493848	-0.663	-1.2027	1	0.964716	0.449203
CARS	NP_001014437.1	1 genes:CARS1.NP_001014437.1:cysteine--tRNA ligase, cytoplasmic isoform c [Homo sapiens] ;NP_001181926.1:cysteine--tRNA ligase, cytoplasmic isoform e [Homo sapiens] ;NP_001742.1:cysteine--tRNA ligase, cytoplasmic isoform b [Homo sapiens] ;NP_644802.1:cysteine--tRNA ligase, cytoplasmic isoform a [Homo sapiens] ;	0.00010044	6.422e-05	6.866e-05	2.917e-05	4.873e-05	4.486e-05	-0.572	-1.0542	1	0.960087	0.502592	-0.541	-1.5383	0.812203	0.961766	0.347305
LYPLA2	NP_009191.1	acyl-protein thioesterase 2 [Homo sapiens]	0.00025594	0.00012101	0.00012349	8.396e-05	9.281e-05	0.00014122	-0.571	-1.2677	0.987822	0.964037	0.433434	-0.384	-0.7784	1	0.948516	0.587793
CLK3	NP_001123500.1	1 genes:CLK3.NP_001123500.1:dual specificity protein kinase CLK3 isoform a [Homo sapiens] ;NP_003983.2:dual specificity protein kinase CLK3 isoform b [Homo sapiens] ;	6.541e-05	2.788e-05	2.439e-05	2.28e-05	1.12e-05	2.922e-05	-0.57	-1.2126	1	0.963601	0.45053	-0.859	-1.4108	0.885776	0.964077	0.382916
EHMT1	NP_001341192.1	1 genes:EHMT1.NP_001341192.1:histone-lysine N-methyltransferase EHMT1 isoform 4 [Homo sapiens] ;NP_079033.4:histone-lysine N-methyltransferase EHMT1 isoform 1 [Homo sapiens] ;	2.694e-05	2.362e-05	8.04e-06	2.629e-05	1.845e-05	1.263e-05	-0.567	-0.9729	1	0.956977	0.528902	-0.484	-1.3013	0.948955	0.965045	0.41977
CHMP7	NP_001350112.1	1 genes:CHMP7.NP_001350112.1:charged multivesicular body protein 7 isoform 3 [Homo sapiens] ;NP_689485.1:charged multivesicular body protein 7 isoform 1 [Homo sapiens] ;	5.675e-05	1.777e-05	3.023e-05	1.13e-05	1.111e-05	2.716e-05	-0.565	-0.6821	1	0.938063	0.620643	-0.677	-0.948	1	0.958291	0.531161
DDX51	NP_778236.2	ATP-dependent RNA helicase DDX51 [Homo sapiens]	0	3.434e-05	0	2.548e-05	7.15e-06	2.099e-05	-0.565	-0.155	1	0.868072	0.773497	6.712	1.7979	0.794611	0.312376	0.988361
NCBP3	NP_001107590.1	nuclear cap-binding protein subunit 3 [Homo sapiens]	0	1.639e-05	0	7.82e-06	3.458e-05	7.52e-06	-0.565	-0.1471	1	0.865581	0.77711	6.288	1.7244	0.836843	0.331131	0.990398
PDE12	NP_808881.3	2',5'-phosphodiesterase 12 isoform 1 precursor [Homo sapiens]	5.711e-05	5.007e-05	2.129e-05	4.379e-05	5.085e-05	6.504e-05	-0.564	-1.1822	1	0.963049	0.463422	0.097	0.2976	1	0.768784	0.886793
TOR1AIP1	NP_056417.2	torsin-1A-interacting protein 1 isoform 2 [Homo sapiens]	2.983e-05	0	3.559e-05	0	2.452e-05	1.599e-05	-0.564	-0.1483	1	0.865581	0.777109	6.79	2.1415	0.60501	0.223446	0.973144
UBFD1	NP_061989.2	ubiquitin domain-containing protein UBFD1 [Homo sapiens]	4.502e-05	4.112e-05	4.196e-05	1.569e-05	2.313e-05	3.016e-05	-0.562	-0.8965	1	0.953635	0.550889	-0.512	-1.5962	0.779041	0.959969	0.328213
SARM1	NP_055892.2	sterile alpha and TIR motif-containing protein 1 precursor [Homo sapiens]	1.921e-05	2.106e-05	1.433e-05	1.005e-05	0	2.253e-05	-0.561	-1.473	0.873557	0.962829	0.371132	-7.565	-2.0413	0.538818	0.941733	0.215866
KNOP1	NP_001335456.1	1 genes:KNOP1.NP_001335456.1:lysine-rich nucleolar protein 1 isoform a [Homo sapiens] ;NP_001335460.1:lysine-rich nucleolar protein 1 isoform b [Homo sapiens] ;NP_001335461.1:lysine-rich nucleolar protein 1 isoform c [Homo sapiens] ;	9.399e-05	3.434e-05	3.004e-05	3.744e-05	4.599e-05	4.048e-05	-0.561	-1.0788	1	0.960914	0.493857	-0.271	-0.4962	1	0.922108	0.677332
RCOR1	NP_055971.2	REST corepressor 1 [Homo sapiens]	6.453e-05	2.62e-05	3.342e-05	1.5e-05	5.01e-05	3.003e-05	-0.561	-0.9477	1	0.955728	0.537685	-0.058	-0.1032	1	0.859677	0.793554
RPS27L	NP_057004.1	40S ribosomal protein S27-like [Homo sapiens]	0.00057526	0.00012101	0.00017289	0.00011544	5.672e-05	0.00011096	-0.561	-0.7005	1	0.93927	0.616324	-1.155	-1.4575	0.858782	0.963449	0.370873
HNRNPA1	NP_002127.1	heterogeneous nuclear ribonucleoprotein A1 isoform a [Homo sapiens]	0.0157366	0.0193601	0.00750724	0.0129696	0.0143966	0.0123029	-0.559	-1.3493	0.942679	0.964066	0.408139	-0.279	-1.0032	1	0.960378	0.513742
ZNF581	NP_057619.1	zinc finger protein 581 [Homo sapiens]	0	3.87e-05	0	2.461e-05	0	2.366e-05	-0.557	-0.1393	1	0.863059	0.7807	-0.829	-0.2015	1	0.879215	0.764445
SUMO2	NP_001005849.1	small ubiquitin-related modifier 2 isoform b precursor [Homo sapiens]	0.00029389	0.00017895	0.00010958	0.00017072	0.00016775	0.00017722	-0.553	-1.264	0.989856	0.963968	0.437661	-0.263	-0.6284	1	0.936394	0.635211
FADS2	NP_004256.1	acyl-CoA 6-desaturase isoform 1 [Homo sapiens]	3.133e-05	2.289e-05	2.336e-05	1.092e-05	4.829e-05	2.099e-05	-0.553	-1.0533	1	0.960086	0.502595	0.173	0.3225	1	0.761822	0.892012
HINT1	NP_005331.1	histidine triad nucleotide-binding protein 1 [Homo sapiens]	0.00298089	0.00108905	0.00129668	0.00092352	0.00119103	0.0015904	-0.552	-0.9903	1	0.957566	0.524507	-0.207	-0.3702	1	0.904592	0.718041
PCYOX1	NP_057381.3	prenylcysteine oxidase 1 precursor [Homo sapiens]	3.443e-05	4.026e-05	1.541e-05	2.88e-05	1.415e-05	4.153e-05	-0.552	-0.9335	1	0.95506	0.542079	-0.365	-0.5596	1	0.928216	0.660614
PAFAH1B2	NP_002563.1	platelet-activating factor acetylhydrolase IB subunit beta isoform a [Homo sapiens]	0.00066821	0.00043277	0.00039637	0.00024348	0.00037447	0.00052911	-0.55	-1.4342	0.895284	0.963402	0.383316	-0.176	-0.438	1	0.913764	0.697884
LSM6	NP_009011.1	U6 snRNA-associated Sm-like protein LSm6 [Homo sapiens]	0.0006086	0.00136585	0.00064834	0.00045454	0.00050619	0.00075729	-0.55	-1.0961	1	0.961294	0.489483	-0.348	-0.6766	1	0.940073	0.622354
ADRM1	NP_008933.2	proteasomal ubiquitin receptor ADRM1 isoform 1 [Homo sapiens]	9.399e-05	6.244e-05	3.823e-05	4.765e-05	5.853e-05	2.863e-05	-0.549	-1.5299	0.841699	0.961836	0.355098	-0.614	-1.2963	0.951829	0.96504	0.419779
FNBP1L	NP_001020119.1	1 genes:FNBP1L.NP_001020119.1:formin-binding protein 1-like isoform 1 [Homo sapiens] ;NP_001157945.1:formin-binding protein 1-like isoform 3 [Homo sapiens] ;NP_060207.2:formin-binding protein 1-like isoform 2 [Homo sapiens] ;	5.049e-05	4.151e-05	1.883e-05	3.52e-05	3.026e-05	3.383e-05	-0.547	-1.2657	0.988921	0.96397	0.43766	-0.321	-0.9867	1	0.959894	0.518102
ZKSCAN1	NP_001333509.1	1 genes:ZKSCAN1.NP_001333509.1:zinc finger protein with KRAB and SCAN domains 1 isoform b [Homo sapiens] ;NP_001333510.1:zinc finger protein with KRAB and SCAN domains 1 isoform a [Homo sapiens] ;	1.98e-05	4.34e-05	1.476e-05	1.84e-05	3.164e-05	3.095e-05	-0.547	-1.1934	1	0.963255	0.459109	0.091	0.1919	1	0.795576	0.864617
UGP2	NP_001001521.1	1 genes:UGP2.NP_001001521.1:UTP--glucose-1-phosphate uridylyltransferase isoform b [Homo sapiens] ;NP_006750.3:UTP--glucose-1-phosphate uridylyltransferase isoform a [Homo sapiens] ;	5.598e-05	4.602e-05	5.74e-05	1.463e-05	3.834e-05	5.626e-05	-0.547	-0.796	1	0.946816	0.585917	-0.109	-0.3033	1	0.894597	0.737736
HHIP	NP_071920.1	hedgehog-interacting protein precursor [Homo sapiens]	1.987e-05	0	0	6.93e-06	6.81e-06	6.66e-06	-0.545	-0.1479	1	0.865581	0.77711	6.544	1.9988	0.681678	0.259173	0.980378
TSG101	NP_006283.1	tumor susceptibility gene 101 protein [Homo sapiens]	2.675e-05	2.606e-05	1.995e-05	1.243e-05	3.665e-05	2.39e-05	-0.544	-1.5081	0.853901	0.962367	0.363054	0.136	0.3792	1	0.747602	0.90205
MBNL1	NP_001350799.1	muscleblind-like protein 1 isoform 9 [Homo sapiens]	0.00022541	0.00021614	0.00017885	9.404e-05	0.00016428	0.00012052	-0.543	-1.2333	1	0.963746	0.446215	-0.438	-1.2937	0.953322	0.965039	0.419788
DGKZ	NP_001099010.1	1 genes:DGKZ.NP_001099010.1:diacylglycerol kinase zeta isoform 4 [Homo sapiens] ;NP_001186195.1:diacylglycerol kinase zeta isoform 5 [Homo sapiens] ;NP_001186196.1:diacylglycerol kinase zeta isoform 6 [Homo sapiens] ;NP_001186197.1:diacylglycerol kinase zeta isoform 7 [Homo sapiens] ;NP_003637.2:diacylglycerol kinase zeta isoform 2 [Homo sapiens] ;NP_963290.1:diacylglycerol kinase zeta isoform 1 …	1.557e-05	6.82e-06	4.64e-06	8.68e-06	0	6.26e-06	-0.543	-0.9801	1	0.957558	0.52453	-6.154	-1.8027	0.663572	0.952824	0.273966
TCF20	NP_005641.1	1 genes:TCF20.NP_005641.1:transcription factor 20 isoform 1 [Homo sapiens] ;NP_852469.1:transcription factor 20 isoform 2 [Homo sapiens] ;	2.307e-05	2.204e-05	9.26e-06	1.855e-05	1.215e-05	1.902e-05	-0.542	-1.3141	0.96222	0.964145	0.420707	-0.418	-1.1317	1	0.963848	0.47055
TEX2	NP_001275661.1	testis-expressed protein 2 isoform 2 [Homo sapiens]	1.851e-05	9.02e-06	4.6e-06	1.291e-05	2.325e-05	1.447e-05	-0.541	-0.8543	1	0.950468	0.568414	0.384	0.7902	1	0.626363	0.961555
RBM33	NP_444271.2	RNA-binding protein 33 [Homo sapiens]	2.972e-05	8.69e-06	1.33e-05	6.22e-06	1.222e-05	1.593e-05	-0.541	-0.7528	1	0.943764	0.598992	-0.162	-0.2372	1	0.883777	0.756918
ACTA2	NP_001307784.1	actin, aortic smooth muscle [Homo sapiens]	0.00089758	0.00010972	0.00018225	0.00020347	0.00027986	0.00020381	-0.537	-0.64	1	0.934266	0.633528	-0.046	-0.0347	1	0.846416	0.81092
PM20D2	NP_001010853.1	peptidase M20 domain-containing protein 2 [Homo sapiens]	5.583e-05	0	0.00010112	0	3.824e-05	7.482e-05	-0.532	-0.1455	1	0.86558	0.777111	7.813	2.1986	0.575411	0.211202	0.970299
KCTD12	NP_612453.1	BTB/POZ domain-containing protein KCTD12 [Homo sapiens]	0	3.128e-05	0	2.984e-05	0	2.868e-05	-0.532	-0.132	1	0.863055	0.780702	-0.325	-0.0766	1	0.854469	0.80058
SCAMP3	NP_005689.2	secretory carrier-associated membrane protein 3 isoform 1 [Homo sapiens]	4.009e-05	2.197e-05	2.242e-05	1.397e-05	3.432e-05	0	-0.531	-1.1433	1	0.962553	0.472113	-7.524	-2.2294	0.449378	0.93203	0.176337
FAF2	NP_055428.1	FAS-associated factor 2 [Homo sapiens]	2.345e-05	5.139e-05	1.748e-05	2.724e-05	2.676e-05	1.047e-05	-0.53	-0.9167	1	0.954362	0.546477	-0.783	-1.0955	1	0.963059	0.483432
AHR	NP_001612.1	aryl hydrocarbon receptor [Homo sapiens]	8.2e-06	0	9.17e-06	0	0	0	-0.53	-0.1535	1	0.865584	0.777108	-7.909	-2.0402	0.539366	0.941732	0.215868
GOLGA1	NP_002068.2	golgin subfamily A member 1 [Homo sapiens]	2.267e-05	2.65e-05	1.352e-05	1.58e-05	9.32e-06	1.823e-05	-0.528	-1.8049	0.690192	0.953553	0.279728	-0.622	-1.4436	0.866814	0.963675	0.374864
IST1	NP_001257904.1	1 genes:IST1.NP_001257904.1:IST1 homolog isoform a [Homo sapiens] ;NP_001257905.1:IST1 homolog isoform c [Homo sapiens] ;NP_001257906.1:IST1 homolog isoform d [Homo sapiens] ;	8.552e-05	4.86e-05	2.834e-05	5.299e-05	1.953e-05	3.82e-05	-0.528	-1.0971	1	0.961295	0.489481	-0.918	-1.7631	0.685279	0.954438	0.284409
WDR77	NP_001303991.1	1 genes:WDR77.NP_001303991.1:methylosome protein 50 isoform 1 [Homo sapiens] ;NP_001303992.1:methylosome protein 50 isoform 3 [Homo sapiens] ;NP_077007.1:methylosome protein 50 isoform 2 [Homo sapiens] ;	9.824e-05	4.307e-05	2.93e-05	4.794e-05	6.729e-05	6.582e-05	-0.528	-0.9149	1	0.95436	0.546481	0.025	0.0524	1	0.826535	0.834068
MEAF6	NP_001257804.1	1 genes:MEAF6.NP_001257804.1:chromatin modification-related protein MEAF6 isoform 2 [Homo sapiens] ;NP_001257805.1:chromatin modification-related protein MEAF6 isoform 3 [Homo sapiens] ;NP_073593.2:chromatin modification-related protein MEAF6 isoform 1 [Homo sapiens] ;	7.283e-05	5.322e-05	5.431e-05	2.538e-05	6.236e-05	3.66e-05	-0.525	-1.285	0.9783	0.964094	0.429171	-0.272	-0.6542	1	0.938872	0.626661
TBCA	NP_004598.1	tubulin-specific chaperone A isoform 2 [Homo sapiens]	0.00048301	0.00011764	0.0001921	0.00011223	0.00015439	0.00021575	-0.522	-0.7312	1	0.942682	0.603358	-0.335	-0.475	1	0.918869	0.685594
SORD	NP_003095.2	sorbitol dehydrogenase [Homo sapiens]	0.00012664	5.694e-05	7.264e-05	3.395e-05	6.672e-05	7.18e-05	-0.522	-0.7145	1	0.940441	0.612002	-0.154	-0.2518	1	0.886008	0.753124
RBM19	NP_001140170.1	probable RNA-binding protein 19 [Homo sapiens]	6.521e-05	3.706e-05	4.322e-05	2.02e-05	3.474e-05	6.796e-05	-0.522	-0.6782	1	0.938061	0.620653	-0.031	-0.0671	1	0.851818	0.804053
SWAP70	NP_001284643.1	1 genes:SWAP70.NP_001284643.1:switch-associated protein 70 isoform 2 [Homo sapiens] ;NP_055870.2:switch-associated protein 70 isoform 1 [Homo sapiens] ;	0.00021117	4.822e-05	0.00013287	3.68e-05	7.684e-05	6.632e-05	-0.522	-0.5371	1	0.922731	0.667373	-0.433	-0.496	1	0.922108	0.677333
CDV3	NP_001127894.1	1 genes:CDV3.NP_001127894.1:protein CDV3 homolog isoform a [Homo sapiens] ;NP_060018.1:protein CDV3 homolog isoform b [Homo sapiens] ;	6.531e-05	5.965e-05	6.088e-05	2.276e-05	3.355e-05	3.282e-05	-0.519	-1.0727	1	0.96052	0.498211	-0.621	-1.9041	0.609192	0.948156	0.247174
RAVER1	NP_597709.3	ribonucleoprotein PTB-binding 1 isoform 1 [Homo sapiens]	0.00024471	0.00031291	0.00015792	0.0001673	0.00013216	0.0001009	-0.518	-1.5207	0.846848	0.96211	0.35906	-0.884	-2.7722	0.24427	0.903049	0.08918
DUS3L	NP_064560.2	tRNA-dihydrouridine(47) synthase [NAD(P)(+)]-like isoform 1 [Homo sapiens]	1.07e-05	1.564e-05	7.98e-06	7.46e-06	1.099e-05	1.434e-05	-0.517	-1.3773	0.927082	0.963918	0.399807	-0.022	-0.0637	1	0.851817	0.804054
ERGIC1	NP_001026881.1	endoplasmic reticulum-Golgi intermediate compartment protein 1 [Homo sapiens]	4.797e-05	5.257e-05	3.577e-05	2.508e-05	2.464e-05	5.624e-05	-0.516	-1.445	0.889237	0.963228	0.37925	-0.33	-0.7494	1	0.946582	0.596476
FHL3	NP_001230807.1	1 genes:FHL3.NP_001230807.1:four and a half LIM domains protein 3 isoform 2 [Homo sapiens] ;NP_004459.2:four and a half LIM domains protein 3 isoform 1 [Homo sapiens] ;	0.00014153	0.00016251	7.539e-05	0.00011275	0.00011079	0.00010838	-0.516	-1.3889	0.920609	0.963926	0.399773	-0.307	-1.0102	1	0.960386	0.513731
TRAF6	NP_665802.1	TNF receptor-associated factor 6 [Homo sapiens]	2.665e-05	2.434e-05	2.484e-05	9.29e-06	0	2.678e-05	-0.516	-0.8899	1	0.952888	0.555259	-6.645	-1.7231	0.70744	0.955967	0.295058
ZNF184	NP_001305820.1	1 genes:ZNF184.NP_001305820.1:zinc finger protein 184 isoform 1 [Homo sapiens] ;NP_001305822.1:zinc finger protein 184 isoform 2 [Homo sapiens] ;	0	1.692e-05	6.91e-06	0	9.52e-06	0	-0.516	-0.1274	1	0.863055	0.780706	-1.481	-0.4966	1	0.922109	0.677331
H6PD	NP_001269516.1	1 genes:H6PD.NP_001269516.1:GDH/6PGL endoplasmic bifunctional protein isoform 1 precursor [Homo sapiens] ;NP_004276.2:GDH/6PGL endoplasmic bifunctional protein isoform 2 precursor [Homo sapiens] ;	5.637e-05	6.337e-05	3.234e-05	3.93e-05	3.564e-05	6.682e-05	-0.514	-1.457	0.882519	0.963235	0.379209	-0.206	-0.4851	1	0.920504	0.68147
GYS1	NP_001155059.1	1 genes:GYS1.NP_001155059.1:glycogen [starch] synthase, muscle isoform 2 [Homo sapiens] ;NP_002094.2:glycogen [starch] synthase, muscle isoform 1 [Homo sapiens] ;	0.00012919	4.531e-05	6.936e-05	2.882e-05	2.832e-05	4.847e-05	-0.514	-0.8365	1	0.949595	0.572798	-0.8	-1.1881	1	0.964586	0.453455
GNPDA2	NP_001257809.1	glucosamine-6-phosphate isomerase 2 isoform 2 [Homo sapiens]	0.00014371	6.3e-05	0.0001219	2.504e-05	0.00011812	8.666e-05	-0.514	-0.5861	1	0.928756	0.650553	0.093	0.1663	1	0.802	0.858754
EPHA2	NP_001316019.1	1 genes:EPHA2.NP_001316019.1:ephrin type-A receptor 2 isoform 2 [Homo sapiens] ;NP_004422.2:ephrin type-A receptor 2 isoform 1 precursor [Homo sapiens] ;	3.395e-05	3.583e-05	1.688e-05	2.629e-05	4.65e-05	3.033e-05	-0.513	-1.341	0.947296	0.964113	0.412299	0.074	0.2084	1	0.792323	0.867501
VBP1	NP_001290472.1	1 genes:VBP1.NP_001290472.1:prefoldin subunit 3 isoform 2 [Homo sapiens] ;NP_003363.1:prefoldin subunit 3 isoform 1 [Homo sapiens] ;	0.00034329	0.00016359	0.00017809	0.00011445	0.00012268	0.00013001	-0.512	-1.0311	1	0.95916	0.511345	-0.62	-1.4727	0.850002	0.963208	0.366898
NAF1	NP_001122403.1	1 genes:NAF1.NP_001122403.1:H/ACA ribonucleoprotein complex non-core subunit NAF1 isoform b [Homo sapiens] ;NP_612395.2:H/ACA ribonucleoprotein complex non-core subunit NAF1 isoform a [Homo sapiens] ;	3.576e-05	3.266e-05	1.333e-05	3.116e-05	0	2.396e-05	-0.511	-0.8853	1	0.952885	0.555271	-7.415	-2.0099	0.554568	0.943059	0.221939
DYSF	NP_001123927.1	1 genes:DYSF.NP_001123927.1:dysferlin isoform 2 [Homo sapiens] ;NP_001124448.1:dysferlin isoform 9 [Homo sapiens] ;NP_001124449.1:dysferlin isoform 10 [Homo sapiens] ;NP_001124450.1:dysferlin isoform 11 [Homo sapiens] ;NP_001124451.1:dysferlin isoform 12 [Homo sapiens] ;NP_001124452.1:dysferlin isoform 13 [Homo sapiens] ;NP_001124453.1:dysferlin isoform 14 [Homo sapiens] ;NP_001124454.1:dysferlin…	1.003e-05	1.221e-05	3.74e-06	1.281e-05	1.259e-05	1.792e-05	-0.511	-0.6163	1	0.931578	0.642058	0.266	0.7102	1	0.65106	0.952563
LTBP3	NP_001123616.1	1 genes:LTBP3.NP_001123616.1:latent-transforming growth factor beta-binding protein 3 isoform 1 precursor [Homo sapiens] ;NP_001157738.1:latent-transforming growth factor beta-binding protein 3 isoform 3 [Homo sapiens] ;NP_066548.2:latent-transforming growth factor beta-binding protein 3 isoform 2 precursor [Homo sapiens] ;	1.068e-05	2.925e-05	5.97e-06	1.674e-05	1.828e-05	2.146e-05	-0.511	-0.4723	1	0.916167	0.683981	0.17	0.3501	1	0.75476	0.897098
RFWD2	NP_001001740.1	1 genes:COP1.NP_001001740.1:E3 ubiquitin-protein ligase COP1 isoform b [Homo sapiens] ;NP_071902.2:E3 ubiquitin-protein ligase COP1 isoform a [Homo sapiens] ;	0	1.078e-05	0	6.86e-06	0	0	-0.511	-0.1341	1	0.863056	0.780701	-7.196	-1.778	0.677083	0.953911	0.280902
HNRNPK	NP_002131.2	heterogeneous nuclear ribonucleoprotein K isoform a [Homo sapiens]	0.00051966	0.0013308	0.00038725	0.00064188	0.00077083	0.00055073	-0.509	-0.6962	1	0.939265	0.61633	-0.263	-0.5053	1	0.922116	0.677321
CTBS	NP_004379.1	di-N-acetylchitobiase precursor [Homo sapiens]	6.323e-05	6.6e-05	2.694e-05	5.667e-05	3.712e-05	4.842e-05	-0.507	-1.1533	1	0.962559	0.472081	-0.413	-1.3136	0.941881	0.965011	0.415616
TMED2	NP_006806.1	transmembrane emp24 domain-containing protein 2 isoform 1 precursor [Homo sapiens]	0.00019032	0.00025285	0.00012902	0.00014473	0.00015406	0.00012752	-0.506	-1.4246	0.900657	0.96356	0.387397	-0.425	-1.1997	1	0.964714	0.449214
MAD2L1BP	NP_001003690.1	1 genes:MAD2L1BP.NP_001003690.1:MAD2L1-binding protein isoform 1 [Homo sapiens] ;NP_055443.1:MAD2L1-binding protein isoform 2 [Homo sapiens] ;	9.092e-05	5.813e-05	3.39e-05	5.546e-05	0	0	-0.506	-1.177	1	0.963044	0.463431	-18.081	-52.3851	0	0.832892	0
HPS6	NP_079023.2	Hermansky-Pudlak syndrome 6 protein [Homo sapiens]	3.59e-05	1.312e-05	1.339e-05	1.251e-05	0	6.01e-06	-0.506	-0.9707	1	0.956975	0.528907	-8.323	-2.129	0.496037	0.936955	0.195487
ALDOA	NP_001230106.1	fructose-bisphosphate aldolase A isoform 2 [Homo sapiens]	0.0031678	0.00220014	0.00156322	0.00159447	0.00105414	0.00246885	-0.504	-1.4871	0.86566	0.962605	0.367098	-0.45	-0.9769	1	0.959387	0.522442
INTS7	NP_001186740.1	1 genes:INTS7.NP_001186740.1:integrator complex subunit 7 isoform 2 [Homo sapiens] ;NP_001186741.1:integrator complex subunit 7 isoform 3 [Homo sapiens] ;NP_056249.1:integrator complex subunit 7 isoform 1 [Homo sapiens] ;	4.769e-05	2.144e-05	1.094e-05	3.069e-05	1.759e-05	1.475e-05	-0.504	-0.8324	1	0.949591	0.572806	-0.693	-1.4735	0.849539	0.963209	0.366897
ECM1	NP_001189787.1	1 genes:ECM1.NP_001189787.1:extracellular matrix protein 1 isoform 3 precursor [Homo sapiens] ;NP_004416.2:extracellular matrix protein 1 isoform 1 precursor [Homo sapiens] ;	1.84e-05	0	1.83e-05	0	1.68e-05	8.22e-06	-0.502	-0.115	1	0.860496	0.78427	7.117	1.96	0.703102	0.269416	0.982171
ZSCAN26	NP_001018854.2	1 genes:ZSCAN26.NP_001018854.2:zinc finger and SCAN domain-containing protein 26 isoform a [Homo sapiens] ;NP_001104509.1:zinc finger and SCAN domain-containing protein 26 isoform b [Homo sapiens] ;NP_001274350.1:zinc finger and SCAN domain-containing protein 26 isoform c [Homo sapiens] ;NP_001274351.1:zinc finger and SCAN domain-containing protein 26 isoform d [Homo sapiens] ;	2.904e-05	1.061e-05	1.083e-05	1.012e-05	9.95e-06	1.459e-05	-0.5	-0.9265	1	0.955054	0.542095	-0.38	-0.6871	1	0.941231	0.618059
CARHSP1	NP_055131.2	calcium-regulated heat-stable protein 1 [Homo sapiens]	0.00059145	0.00022472	0.00026463	0.0001814	0.00019445	0.00030117	-0.5	-0.8825	1	0.952884	0.555281	-0.351	-0.4941	1	0.922108	0.677337
TOR3A	NP_071766.2	torsin-3A precursor [Homo sapiens]	5.256e-05	3.2e-05	2.613e-05	2.443e-05	4.8e-05	2.935e-05	-0.499	-1.2998	0.970131	0.96413	0.424932	-0.068	-0.1343	1	0.86476	0.786423
PPP2R5E	NP_001269108.1	serine/threonine-protein phosphatase 2A 56 kDa regulatory subunit epsilon isoform isoform a [Homo sapiens]	0.0001688	0.00011212	8.059e-05	8.589e-05	4.017e-05	7.062e-05	-0.498	-1.4834	0.867733	0.962835	0.371096	-0.931	-2.1638	0.479577	0.935562	0.189872
WDR74	NP_001294906.1	1 genes:WDR74.NP_001294906.1:WD repeat-containing protein 74 isoform 2 [Homo sapiens] ;NP_001356376.1:WD repeat-containing protein 74 isoform 3 [Homo sapiens] ;NP_001356380.1:WD repeat-containing protein 74 isoform 1 [Homo sapiens] ;	0.00010452	0.00011803	7.794e-05	5.961e-05	2.603e-05	5.093e-05	-0.497	-1.4533	0.884592	0.963231	0.379215	-1.095	-2.429	0.364499	0.921252	0.139601
ATOX1	NP_004036.1	copper transport protein ATOX1 [Homo sapiens]	0.00025571	0.00011211	0.00015255	7.13e-05	0.00010509	6.853e-05	-0.497	-0.8028	1	0.947767	0.581563	-0.672	-1.362	0.913978	0.964685	0.399144
ZNF444	NP_001240721.1	1 genes:ZNF444.NP_001240721.1:zinc finger protein 444 isoform 2 [Homo sapiens] ;NP_060807.2:zinc finger protein 444 isoform 1 [Homo sapiens] ;	0	3.118e-05	0	1.487e-05	0	0	-0.496	-0.1272	1	0.863055	0.780706	-8.942	-2.1617	0.480561	0.935561	0.189874
COTL1	NP_066972.1	coactosin-like protein [Homo sapiens]	0.00181233	0.00071581	0.00063921	0.00068288	0.00058713	0.00078765	-0.495	-0.9175	1	0.954363	0.546475	-0.503	-0.785	1	0.948525	0.587786
ARHGAP10	NP_078881.3	rho GTPase-activating protein 10 [Homo sapiens]	5.752e-05	3.556e-05	1.65e-05	4.935e-05	3.334e-05	2.965e-05	-0.495	-0.7663	1	0.944811	0.594641	-0.358	-1.0183	1	0.960837	0.509392
TUBA1A	NP_006000.2	tubulin alpha-1A chain isoform 1 [Homo sapiens]	0.00446598	0.00143841	0.00130963	0.00181548	0.00170624	0.00077998	-0.494	-0.7771	1	0.945825	0.59029	-0.757	-0.8637	1	0.953623	0.56167
PDCD11	NP_055791.1	protein RRP5 homolog [Homo sapiens]	0.00020446	0.00024447	0.00013861	0.00013864	0.00011713	0.0001071	-0.493	-1.5495	0.830739	0.961551	0.351116	-0.702	-2.1632	0.479858	0.935562	0.189872
NEK9	NP_001316166.1	1 genes:NEK9.NP_001316166.1:serine/threonine-protein kinase Nek9 isoform 1 [Homo sapiens] ;NP_001316167.1:serine/threonine-protein kinase Nek9 isoform 3 [Homo sapiens] ;NP_149107.4:serine/threonine-protein kinase Nek9 isoform 2 [Homo sapiens] ;	5.966e-05	3.59e-05	3.14e-05	2.446e-05	2.404e-05	3.997e-05	-0.493	-1.3996	0.914634	0.963821	0.395633	-0.409	-1.0312	1	0.961269	0.505052
MAX	NP_002373.3	1 genes:MAX.NP_002373.3:protein max isoform a [Homo sapiens] ;NP_660087.1:protein max isoform b [Homo sapiens] ;NP_660088.1:protein max isoform c [Homo sapiens] ;	0.00019562	0.00015882	0.00012967	9.091e-05	0.0001191	0.00014563	-0.493	-1.3445	0.94535	0.964116	0.41229	-0.278	-0.7719	1	0.947574	0.592127
WBP11	NP_057396.1	WW domain-binding protein 11 [Homo sapiens]	4.34e-05	6.739e-05	4.855e-05	2.269e-05	7.061e-05	4.726e-05	-0.493	-0.9169	1	0.954362	0.546476	0.043	0.1088	1	0.814503	0.846654
CAST	NP_001035905.1	calpastatin isoform f [Homo sapiens]	0.00017157	9.148e-05	4.495e-05	0.0001196	0.00010163	5.282e-05	-0.493	-0.6057	1	0.930188	0.646307	-0.516	-1.0714	1	0.962417	0.492059
PPP1R13L	NP_006654.2	relA-associated inhibitor [Homo sapiens]	5.46e-05	2.148e-05	2.506e-05	1.757e-05	2.014e-05	3.94e-05	-0.49	-0.864	1	0.9513	0.564033	-0.217	-0.346	1	0.900696	0.725976
PPM1A	NP_066283.1	1 genes:PPM1A.NP_066283.1:protein phosphatase 1A isoform 1 [Homo sapiens] ;NP_808820.1:protein phosphatase 1A isoform 2 [Homo sapiens] ;NP_808821.2:protein phosphatase 1A isoform 3 [Homo sapiens] ;	4.552e-05	0	0	2.538e-05	0	1.83e-05	-0.488	-0.1048	1	0.857906	0.787806	-0.748	-0.1986	1	0.876891	0.76816
CRYZL1	NP_665857.2	quinone oxidoreductase-like protein 1 [Homo sapiens]	0.00011958	5.097e-05	4.459e-05	4.862e-05	1.365e-05	3.338e-05	-0.487	-0.9999	1	0.958119	0.520123	-1.301	-2.2394	0.444872	0.931317	0.173713
AES	NP_001121.2	1 genes:TLE5.NP_001121.2:TLE family member 5 isoform b [Homo sapiens] ;NP_945321.1:TLE family member 5 isoform c [Homo sapiens] ;	0.00017653	3.87e-05	9.215e-05	2.461e-05	4.837e-05	0.00011828	-0.487	-0.5188	1	0.921137	0.671548	-0.136	-0.1514	1	0.869706	0.779196
CSDE1	NP_001007554.1	1 genes:CSDE1.NP_001007554.1:cold shock domain-containing protein E1 isoform 1 [Homo sapiens] ;NP_001229820.1:cold shock domain-containing protein E1 isoform 4 [Homo sapiens] ;	0.00014381	0.00013056	8.775e-05	7.898e-05	0.00012239	7.592e-05	-0.486	-1.6145	0.794496	0.959891	0.331607	-0.353	-0.9867	1	0.959894	0.518102
TEP1	NP_001305964.1	1 genes:TEP1.NP_001305964.1:telomerase protein component 1 isoform 2 [Homo sapiens] ;NP_009041.2:telomerase protein component 1 isoform 1 [Homo sapiens] ;	1.104e-05	4.04e-06	2.06e-06	8.66e-06	2.84e-06	1.203e-05	-0.486	-0.6108	1	0.931574	0.642068	-0.076	-0.0959	1	0.859675	0.793559
DIDO1	NP_149072.2	death-inducer obliterator 1 isoform c [Homo sapiens]	2.018e-05	1.361e-05	1.042e-05	9.74e-06	2.02e-05	1.456e-05	-0.485	-1.4724	0.873893	0.962829	0.371136	0.008	0.0225	1	0.83524	0.82432
DMD	NP_004007.1	1 genes:DMD.NP_004007.1:dystrophin isoform Dp71b [Homo sapiens] ;NP_004009.1:dystrophin isoform Dp71ab [Homo sapiens] ;NP_004012.2:dystrophin isoform Dp140b [Homo sapiens] ;NP_004013.1:dystrophin isoform D140ab [Homo sapiens] ;NP_004014.2:dystrophin isoform Dp140bc [Homo sapiens] ;	2.191e-05	2.801e-05	2.042e-05	1.145e-05	1.501e-05	1.835e-05	-0.485	-1.1321	1	0.962274	0.476441	-0.401	-1.3436	0.924595	0.964791	0.403266
PRPSAP2	NP_001230865.1	1 genes:PRPSAP2.NP_001230865.1:phosphoribosyl pyrophosphate synthase-associated protein 2 isoform 2 [Homo sapiens] ;NP_001340025.1:phosphoribosyl pyrophosphate synthase-associated protein 2 isoform 5 [Homo sapiens] ;NP_001340027.1:phosphoribosyl pyrophosphate synthase-associated protein 2 isoform 6 [Homo sapiens] ;NP_001340029.1:phosphoribosyl pyrophosphate synthase-associated protein 2 isoform 4…	0.0002854	8.496e-05	0.00011824	8.105e-05	6.516e-05	9.915e-05	-0.485	-0.5979	1	0.930181	0.646317	-0.601	-0.9637	1	0.958853	0.526796
PRSS23	NP_009104.3	serine protease 23 precursor [Homo sapiens]	9.988e-05	8.625e-05	7.448e-05	4.431e-05	8.085e-05	5.475e-05	-0.484	-1.3278	0.954626	0.964139	0.416496	-0.331	-0.9751	1	0.959386	0.522447
GTF3C5	NP_001116295.1	1 genes:GTF3C5.NP_001116295.1:general transcription factor 3C polypeptide 5 isoform 1 [Homo sapiens] ;NP_036219.2:general transcription factor 3C polypeptide 5 isoform 2 [Homo sapiens] ;	0.00010579	8.213e-05	4.437e-05	7.835e-05	8.152e-05	6.645e-05	-0.484	-1.2396	1	0.963862	0.441964	-0.269	-0.7208	1	0.94453	0.605138
ZNF318	NP_055160.2	zinc finger protein 318 [Homo sapiens]	6.1e-06	3.35e-06	3.41e-06	2.13e-06	6.27e-06	5.11e-06	-0.483	-0.9841	1	0.957559	0.524517	0.19	0.4556	1	0.725563	0.916105
FBXO22	NP_671717.1	F-box only protein 22 isoform a [Homo sapiens]	1.726e-05	0	0	1.203e-05	2.955e-05	0	-0.483	-0.13	1	0.863055	0.780704	0.065	0.0164	1	0.835241	0.824319
STK10	NP_005981.3	serine/threonine-protein kinase 10 [Homo sapiens]	1.597e-05	9.63e-06	6.07e-06	9.39e-06	1.969e-05	9.85e-06	-0.482	-1.1612	1	0.96281	0.467763	0.106	0.2167	1	0.789041	0.870355
DDT	NP_001346.1	D-dopachrome decarboxylase [Homo sapiens]	0.00067786	0.0004953	0.00037362	0.00034925	0.00020187	0.00041468	-0.481	-1.514	0.850597	0.962108	0.359089	-0.668	-1.4457	0.8656	0.963677	0.37486
EEF1E1	NP_004271.1	eukaryotic translation elongation factor 1 epsilon-1 isoform 1 [Homo sapiens]	0.00013991	8.762e-05	0.00010433	4.18e-05	0.00012321	0.00010713	-0.481	-0.8971	1	0.953636	0.550887	0.031	0.0888	1	0.820578	0.840421
EDC3	NP_079359.2	enhancer of mRNA-decapping protein 3 isoform 1 [Homo sapiens]	2.054e-05	3.502e-05	2.042e-05	1.432e-05	2.345e-05	2.752e-05	-0.479	-0.9572	1	0.956363	0.533299	-0.067	-0.1571	1	0.869708	0.779192
RRS1	NP_055984.1	ribosome biogenesis regulatory protein homolog [Homo sapiens]	0.00014292	0.00016709	9.237e-05	9.963e-05	9.137e-05	0.00015321	-0.475	-1.4836	0.867621	0.962835	0.371096	-0.292	-0.6858	1	0.94123	0.618061
FAM213A	NP_001230707.1	1 genes:PRXL2A.NP_001230707.1:peroxiredoxin-like 2A isoform 1 precursor [Homo sapiens] ;NP_001230710.1:peroxiredoxin-like 2A isoform 2 precursor [Homo sapiens] ;NP_001230711.1:peroxiredoxin-like 2A isoform 3 precursor [Homo sapiens] ;	6.075e-05	6.658e-05	2.265e-05	6.352e-05	4.161e-05	6.105e-05	-0.474	-0.5534	1	0.925804	0.659004	-0.267	-0.7505	1	0.946583	0.596473
NACA	NP_001106674.2	1 genes:NACA.NP_001106674.2:nascent polypeptide-associated complex subunit alpha isoform a [Homo sapiens] ;NP_001307123.1:nascent polypeptide-associated complex subunit alpha isoform c [Homo sapiens] ;NP_001352825.1:nascent polypeptide-associated complex subunit alpha isoform d [Homo sapiens] ;NP_005585.1:nascent polypeptide-associated complex subunit alpha isoform b [Homo sapiens] ;	0.00015791	5.769e-05	7.85e-05	4.455e-05	6.18e-05	5.038e-05	-0.473	-0.8479	1	0.95046	0.568421	-0.454	-0.7802	1	0.948518	0.58779
OGT	NP_858058.1	UDP-N-acetylglucosamine--peptide N-acetylglucosaminyltransferase 110 kDa subunit isoform 1 [Homo sapiens]	8.977e-05	7.531e-05	5.702e-05	5.099e-05	6.604e-05	4.455e-05	-0.472	-1.1287	1	0.96198	0.480765	-0.408	-1.1277	1	0.963615	0.474814
INIP	NP_001316514.1	1 genes:INIP.NP_001316514.1:SOSS complex subunit C isoform b [Homo sapiens] ;NP_067041.1:SOSS complex subunit C isoform a [Homo sapiens] ;	0.00024103	0.0001258	0.00010271	0.00012001	9.434e-05	0.00023071	-0.472	-1.0417	1	0.959635	0.506968	-0.219	-0.336	1	0.900689	0.725986
CHMP5	NP_001182465.1	1 genes:CHMP5.NP_001182465.1:charged multivesicular body protein 5 isoform 2 [Homo sapiens] ;NP_057494.3:charged multivesicular body protein 5 isoform 1 [Homo sapiens] ;	8.135e-05	0	4.55e-05	0	0	0	-0.472	-0.1346	1	0.863056	0.780701	-8.157	-2.2393	0.444917	0.931317	0.173713
MRRF	NP_001166983.1	ribosome-recycling factor, mitochondrial isoform 3 precursor [Homo sapiens]	3.312e-05	0	0	2.309e-05	0	0	-0.472	-0.1046	1	0.857906	0.787806	-7.863	-1.935	0.593	0.946919	0.240701
KIAA1671	NP_001138678.1	uncharacterized protein KIAA1671 [Homo sapiens]	3.466e-05	2.111e-05	1.867e-05	1.342e-05	1.187e-05	2.451e-05	-0.471	-1.1476	1	0.962554	0.472094	-0.461	-0.9625	1	0.958852	0.5268
BROX	NP_001275508.1	1 genes:BROX.NP_001275508.1:BRO1 domain-containing protein BROX isoform b [Homo sapiens] ;NP_001362687.1:BRO1 domain-containing protein BROX isoform d [Homo sapiens] ;NP_653296.2:BRO1 domain-containing protein BROX isoform a [Homo sapiens] ;	8.258e-05	5.364e-05	3.421e-05	5.117e-05	2.514e-05	4.918e-05	-0.47	-1.1642	1	0.962812	0.467754	-0.671	-1.3706	0.90901	0.964558	0.39508
BMP2K	NP_942595.1	BMP-2-inducible protein kinase isoform a [Homo sapiens]	1.797e-05	2.626e-05	1.117e-05	1.67e-05	6.16e-06	3.011e-05	-0.47	-1.0906	1	0.96129	0.4895	-0.441	-0.5293	1	0.925226	0.668995
PAIP1	NP_006442.2	1 genes:PAIP1.NP_006442.2:polyadenylate-binding protein-interacting protein 1 isoform 1 [Homo sapiens] ;NP_877590.1:polyadenylate-binding protein-interacting protein 1 isoform 2 [Homo sapiens] ;	9.438e-05	3.183e-05	4.331e-05	2.531e-05	1.492e-05	3.892e-05	-0.47	-0.7554	1	0.943767	0.598989	-0.752	-1.0196	1	0.960838	0.50939
PYM1	NP_001137325.1	1 genes:PYM1.NP_001137325.1:partner of Y14 and mago isoform 2 [Homo sapiens] ;NP_115721.1:partner of Y14 and mago isoform 1 [Homo sapiens] ;	3.426e-05	0.0001377	2.555e-05	7.165e-05	0.00015255	6.887e-05	-0.47	-0.5715	1	0.927297	0.654781	0.41	0.6017	1	0.683203	0.938703
	NP_001337406.1	adenylyl cyclase-associated protein 1 isoform a [Homo sapiens]	0.00076632	0.00037983	0.00035306	0.00032663	0.00033098	0.00033714	-0.469	-1.0679	1	0.960514	0.498218	-0.482	-1.2518	0.977323	0.965021	0.432337
TTLL12	NP_055955.1	tubulin--tyrosine ligase-like protein 12 [Homo sapiens]	0.00017281	0.00010654	0.00011276	6.399e-05	7.768e-05	0.00011216	-0.469	-0.9372	1	0.955721	0.537714	-0.394	-0.9514	1	0.958293	0.531151
RALGAPB	NP_001269846.1	1 genes:RALGAPB.NP_001269846.1:ral GTPase-activating protein subunit beta isoform 1 [Homo sapiens] ;NP_001269847.1:ral GTPase-activating protein subunit beta isoform 2 [Homo sapiens] ;	2.561e-05	2.211e-05	8.68e-06	2.434e-05	4.78e-06	2.184e-05	-0.468	-0.9335	1	0.95506	0.542079	-0.822	-1.2735	0.964909	0.965052	0.428119
SP1	NP_001238754.1	1 genes:SP1.NP_001238754.1:transcription factor Sp1 isoform c [Homo sapiens] ;NP_003100.1:transcription factor Sp1 isoform b [Homo sapiens] ;NP_612482.2:transcription factor Sp1 isoform a [Homo sapiens] ;	9.437e-05	2.414e-05	2.815e-05	3.289e-05	3.232e-05	3.162e-05	-0.468	-0.6872	1	0.938068	0.620637	-0.408	-0.5636	1	0.92965	0.656416
TUBB6	NP_115914.1	tubulin beta-6 chain isoform 1 [Homo sapiens]	0.0004937	0.00065552	0.00034488	0.00037362	0.00087025	0.00049268	-0.467	-1.4046	0.911839	0.963696	0.391537	0.143	0.3672	1	0.751194	0.899589
RB1	NP_000312.2	retinoblastoma-associated protein [Homo sapiens]	8.245e-05	3.56e-05	3.633e-05	2.874e-05	4.62e-05	4.269e-05	-0.467	-0.9691	1	0.956974	0.528912	-0.21	-0.4747	1	0.918869	0.685594
MAP4K4	NP_001229489.1	mitogen-activated protein kinase kinase kinase kinase 4 isoform 5 [Homo sapiens]	4.13e-05	1.35e-05	1.88e-05	1.144e-05	0	0	-0.467	-0.5592	1	0.925807	0.658992	-16.938	-30.4821	0	0.83685	0
C1GALT1	NP_064541.1	glycoprotein-N-acetylgalactosamine 3-beta-galactosyltransferase 1 [Homo sapiens]	6.706e-05	1.4e-05	1.429e-05	2.671e-05	2.625e-05	2.568e-05	-0.463	-0.6458	1	0.934271	0.63352	-0.163	-0.2183	1	0.881511	0.760693
USP36	NP_001308220.1	ubiquitin carboxyl-terminal hydrolase 36 [Homo sapiens]	1.239e-05	4.53e-06	4.62e-06	4.32e-06	0	0	-0.462	-0.9288	1	0.955056	0.542088	-15.722	-25.2853	0	0.837548	0
NRDC	NP_001095132.1	1 genes:NRDC.NP_001095132.1:nardilysin isoform b precursor [Homo sapiens] ;NP_002516.2:nardilysin isoform a [Homo sapiens] ;	6.647e-05	2.429e-05	2.929e-05	2.317e-05	3.932e-05	6.073e-05	-0.46	-0.9504	1	0.955732	0.537683	0.199	0.3753	1	0.7476	0.902052
PYGB	NP_002853.2	glycogen phosphorylase, brain form [Homo sapiens]	0.00040418	0.00011641	0.00015893	0.00013131	0.00012456	0.00017115	-0.458	-0.7446	1	0.942693	0.603333	-0.459	-0.6815	1	0.941227	0.618072
FAH	NP_001361306.1	fumarylacetoacetase [Homo sapiens]	0.0001411	0.00012736	8.046e-05	9.257e-05	9.665e-05	0.00013903	-0.457	-1.442	0.890918	0.963407	0.383292	-0.161	-0.4502	1	0.915498	0.693803
PELO	NP_057030.3	protein pelota homolog [Homo sapiens]	4.517e-05	4.62e-05	3.368e-05	2.519e-05	1.856e-05	3.631e-05	-0.457	-1.294	0.973332	0.964128	0.424958	-0.559	-1.3778	0.904851	0.964562	0.395053
MARK3	NP_001122390.2	1 genes:MARK3.NP_001122390.2:MAP/microtubule affinity-regulating kinase 3 isoform a [Homo sapiens] ;NP_001122391.2:MAP/microtubule affinity-regulating kinase 3 isoform b [Homo sapiens] ;NP_001122393.2:MAP/microtubule affinity-regulating kinase 3 isoform e [Homo sapiens] ;NP_002367.5:MAP/microtubule affinity-regulating kinase 3 isoform c [Homo sapiens] ;	2.309e-05	2.025e-05	6.89e-06	2.576e-05	6.33e-06	1.857e-05	-0.457	-0.7761	1	0.945825	0.590292	-0.67	-1.1897	1	0.964587	0.453449
ENOPH1	NP_001278946.1	1 genes:ENOPH1.NP_001278946.1:enolase-phosphatase E1 isoform 2 [Homo sapiens] ;NP_067027.1:enolase-phosphatase E1 isoform 1 [Homo sapiens] ;	0.00020102	2.938e-05	5.996e-05	4.204e-05	4.131e-05	9.428e-05	-0.455	-0.4736	1	0.916167	0.683979	-0.101	-0.1003	1	0.859676	0.793555
C3orf17	NP_001306038.1	1 genes:NEPRO.NP_001306038.1:nucleolus and neural progenitor protein isoform d [Homo sapiens] ;NP_056227.2:nucleolus and neural progenitor protein isoform a [Homo sapiens] ;	1.399e-05	0	1.565e-05	0	9.59e-06	0	-0.455	-0.1195	1	0.860497	0.784267	-1.392	-0.369	1	0.904591	0.718042
NAA25	NP_079229.2	N-alpha-acetyltransferase 25, NatB auxiliary subunit [Homo sapiens]	5.009e-05	5.751e-05	3.468e-05	3.242e-05	3.186e-05	3.116e-05	-0.454	-1.5391	0.836553	0.961841	0.355072	-0.525	-1.689	0.726502	0.956933	0.302298
ATP6V1A	NP_001681.2	V-type proton ATPase catalytic subunit A [Homo sapiens]	0.00022546	0.00016886	0.00016813	9.43e-05	0.00015829	0.00012085	-0.453	-1.1631	1	0.962811	0.467756	-0.339	-0.838	1	0.952039	0.570386
HNRNPDL	NP_001193929.1	heterogeneous nuclear ribonucleoprotein D-like isoform b [Homo sapiens]	0.00081833	0.00180512	0.00069667	0.00090715	0.00089245	0.00077448	-0.453	-0.9473	1	0.955727	0.537685	-0.423	-0.9691	1	0.958859	0.526787
STAM	NP_001311212.1	signal transducing adapter molecule 1 isoform c [Homo sapiens]	1.419e-05	3.63e-05	2.117e-05	9.89e-06	6.32e-05	3.804e-05	-0.453	-0.7456	1	0.94376	0.599011	0.765	1.3622	1	0.443817	0.993778
PPFIA1	NP_003617.1	1 genes:PPFIA1.NP_003617.1:liprin-alpha-1 isoform b [Homo sapiens] ;NP_803172.1:liprin-alpha-1 isoform a [Homo sapiens] ;	3.761e-05	1.057e-05	1.51e-05	1.21e-05	2.973e-05	1.163e-05	-0.453	-0.7205	1	0.941574	0.607685	-0.109	-0.1529	1	0.869706	0.779195
GRB10	NP_001001549.1	1 genes:GRB10.NP_001001549.1:growth factor receptor-bound protein 10 isoform b [Homo sapiens] ;NP_001001550.1:growth factor receptor-bound protein 10 isoform c [Homo sapiens] ;NP_001337743.1:growth factor receptor-bound protein 10 isoform a [Homo sapiens] ;NP_001337744.1:growth factor receptor-bound protein 10 isoform d [Homo sapiens] ;NP_001357938.1:growth factor receptor-bound protein 10 isofor…	3.808e-05	3.246e-05	1.42e-05	3.539e-05	0	2.126e-05	-0.452	-0.8558	1	0.951295	0.564054	-7.798	-2.3966	0.37754	0.922692	0.144177
FNBP1	NP_001350684.1	1 genes:FNBP1.NP_001350684.1:formin-binding protein 1 isoform 2 [Homo sapiens] ;NP_055848.1:formin-binding protein 1 isoform 1 [Homo sapiens] ;	1.175e-05	0	0	8.19e-06	1.207e-05	1.574e-05	-0.451	-0.1176	1	0.860497	0.784268	6.81	1.7501	0.822042	0.323557	0.989627
RRM1	NP_001024.1	ribonucleoside-diphosphate reductase large subunit isoform 1 [Homo sapiens]	0.00015369	8.663e-05	0.00011461	4.285e-05	7.82e-05	0.00011474	-0.449	-0.8206	1	0.948696	0.577179	-0.2	-0.4907	1	0.92051	0.681464
CTSA	NP_000299.2	1 genes:CTSA. 1 proteins in this group did not match any genes. NP_000299.2:lysosomal protective protein isoform a precursor [Homo sapiens] ;NP_000299.3:lysosomal protective protein isoform a precursor [Homo sapiens] ;NP_001161066.1:lysosomal protective protein isoform c precursor [Homo sapiens] ;	0.00039107	0.00021941	0.00016143	0.00021419	0.00017698	0.00026202	-0.448	-1.0778	1	0.960914	0.493861	-0.31	-0.6875	1	0.941232	0.618059
DCTN2	NP_001248341.1	1 genes:DCTN2.NP_001248341.1:dynactin subunit 2 isoform 2 [Homo sapiens] ;NP_001248342.1:dynactin subunit 2 isoform 3 [Homo sapiens] ;NP_006391.1:dynactin subunit 2 isoform 1 [Homo sapiens] ;	0.00013807	8.197e-05	5.792e-05	7.82e-05	7.684e-05	5.204e-05	-0.448	-1.0504	1	0.960084	0.502604	-0.502	-1.2831	0.959407	0.965054	0.423946
SLC9A3R1	NP_004243.1	Na(+)/H(+) exchange regulatory cofactor NHE-RF1 [Homo sapiens]	0.000204	4.969e-05	0.00010142	4.063e-05	0.00018631	8.461e-05	-0.448	-0.6124	1	0.931575	0.642065	0.372	0.4315	1	0.733	0.911554
GNA13	NP_001269354.1	1 genes:GNA13.NP_001269354.1:guanine nucleotide-binding protein subunit alpha-13 isoform 2 [Homo sapiens] ;NP_006563.2:guanine nucleotide-binding protein subunit alpha-13 isoform 1 [Homo sapiens] ;	0	3.604e-05	0	2.579e-05	2.534e-05	1.653e-05	-0.448	-0.121	1	0.860498	0.784266	6.002	1.8331	0.774514	0.301334	0.98698
VPS50	NP_001244927.1	1 genes:VPS50.NP_001244927.1:syndetin isoform c [Homo sapiens] ;NP_060137.2:syndetin isoform a [Homo sapiens] ;	0	1.36e-05	0	7.79e-06	5.1e-06	7.48e-06	-0.448	-0.1031	1	0.857906	0.787807	5.875	1.6161	0.899407	0.366117	0.993077
RALBP1	NP_006779.1	ralA-binding protein 1 [Homo sapiens]	6.902e-05	3.492e-05	2.772e-05	3.331e-05	2.546e-05	3.557e-05	-0.446	-1.0273	1	0.959156	0.511351	-0.515	-1.1562	1	0.964075	0.466238
SNX4	NP_003785.1	sorting nexin-4 [Homo sapiens]	5.41e-05	3.388e-05	2.305e-05	3.232e-05	3.176e-05	3.625e-05	-0.445	-1.1128	1	0.96165	0.48512	-0.198	-0.546	1	0.926739	0.66481
CRELD2	NP_001128573.1	1 genes:CRELD2.NP_001128573.1:protein disulfide isomerase CRELD2 isoform a precursor [Homo sapiens] ;NP_001271246.1:protein disulfide isomerase CRELD2 isoform c precursor [Homo sapiens] ;NP_077300.3:protein disulfide isomerase CRELD2 isoform b precursor [Homo sapiens] ;	2.595e-05	5.689e-05	2.58e-05	2.412e-05	4.74e-05	1.739e-05	-0.445	-1.0523	1	0.960085	0.502597	-0.246	-0.3808	1	0.906489	0.714047
GOLT1B	NP_057156.1	vesicle transport protein GOT1B [Homo sapiens]	0.000126	0.00014731	5.638e-05	0.00012297	6.905e-05	0.00015196	-0.445	-0.7856	1	0.945835	0.590278	-0.275	-0.5573	1	0.928213	0.660615
PYGL	NP_001157412.1	glycogen phosphorylase, liver form isoform 2 [Homo sapiens]	0.00011561	5.121e-05	6.807e-05	2.785e-05	2.906e-05	6.902e-05	-0.445	-0.4971	1	0.917865	0.679843	-0.541	-0.7842	1	0.948523	0.587786
SSH1	NP_061857.3	protein phosphatase Slingshot homolog 1 isoform 1 [Homo sapiens]	1.989e-05	7.27e-06	1.236e-05	4.62e-06	1.362e-05	0	-0.444	-0.6274	1	0.932937	0.6378	-6.955	-2.1336	0.493844	0.936956	0.195472
ABL1	NP_009297.2	tyrosine-protein kinase ABL1 isoform b [Homo sapiens]	3.632e-05	6.63e-06	9.03e-06	1.055e-05	6.22e-06	1.267e-05	-0.444	-0.565	1	0.925813	0.658986	-0.686	-0.5982	1	0.932451	0.647954
KIAA1522	NP_001185901.1	1 genes:KIAA1522.NP_001185901.1:uncharacterized protein KIAA1522 isoform 2 [Homo sapiens] ;NP_001356482.1:uncharacterized protein KIAA1522 isoform 4 [Homo sapiens] ;NP_065939.2:uncharacterized protein KIAA1522 isoform 1 [Homo sapiens] ;	1.68e-05	3.683e-05	1.253e-05	1.874e-05	9.21e-06	3.827e-05	-0.443	-0.8839	1	0.952884	0.555276	-0.233	-0.2786	1	0.890369	0.745472
PCBD1	NP_000272.1	1 genes:PCBD1.NP_000272.1:pterin-4-alpha-carbinolamine dehydratase isoform 1 [Homo sapiens] ;NP_001276726.1:pterin-4-alpha-carbinolamine dehydratase isoform 3 [Homo sapiens] ;	0.00053503	7.33e-05	0.00019949	6.993e-05	0.00054971	0.00026886	-0.443	-0.4627	1	0.914446	0.688083	0.757	0.775	1	0.630507	0.960141
COG2	NP_001138508.1	1 genes:COG2.NP_001138508.1:conserved oligomeric Golgi complex subunit 2 isoform 2 [Homo sapiens] ;NP_031383.1:conserved oligomeric Golgi complex subunit 2 isoform 1 [Homo sapiens] ;	2.359e-05	1.379e-05	1.056e-05	1.316e-05	1.293e-05	2.529e-05	-0.442	-1.0907	1	0.96129	0.4895	0	0.0008	1	0.838082	0.821011
HABP4	NP_055097.2	intracellular hyaluronan-binding protein 4 [Homo sapiens]	4.21e-05	3.692e-05	1.884e-05	3.522e-05	2.307e-05	3.949e-05	-0.441	-1.1194	1	0.961971	0.480783	-0.258	-0.6231	1	0.935115	0.63946
PEA15	NP_001284505.1	1 genes:PEA15.NP_001284505.1:astrocytic phosphoprotein PEA-15 isoform a [Homo sapiens] ;NP_003759.1:astrocytic phosphoprotein PEA-15 isoform b [Homo sapiens] ;	0.000737	0.00040389	0.00046371	0.00025687	0.00047326	0.00046294	-0.438	-0.8623	1	0.951299	0.564035	-0.159	-0.3931	1	0.908356	0.710034
ZC3H18	NP_001281269.1	1 genes:ZC3H18.NP_001281269.1:zinc finger CCCH domain-containing protein 18 isoform 1 [Homo sapiens] ;NP_653205.3:zinc finger CCCH domain-containing protein 18 isoform 2 [Homo sapiens] ;	4.627e-05	1.04e-05	2.124e-05	7.44e-06	2.194e-05	1.908e-05	-0.438	-0.4661	1	0.914449	0.68808	-0.081	-0.1205	1	0.862236	0.790001
TBCE	NP_001072983.1	1 genes:TBCE.NP_001072983.1:tubulin-specific chaperone E isoform a [Homo sapiens] ;NP_001274730.1:tubulin-specific chaperone E isoform b [Homo sapiens] ;	0.00010559	9.64e-06	3.445e-05	1.38e-05	2.26e-05	2.653e-05	-0.438	-0.2969	1	0.891165	0.735965	-0.266	-0.2385	1	0.883778	0.756917
MTHFD1	NP_001351766.1	1 genes:MTHFD1.NP_001351766.1:C-1-tetrahydrofolate synthase, cytoplasmic isoform 2 [Homo sapiens] ;NP_005947.3:C-1-tetrahydrofolate synthase, cytoplasmic isoform 1 [Homo sapiens] ;	0.00039683	0.00024778	0.00021522	0.00019112	0.00017791	0.00029489	-0.437	-1.1596	1	0.962809	0.467769	-0.298	-0.6951	1	0.942359	0.613766
GIT1	NP_001078923.1	ARF GTPase-activating protein GIT1 isoform 1 [Homo sapiens]	4.517e-05	6.93e-05	5.82e-05	2.204e-05	3.049e-05	2.118e-05	-0.436	-0.8281	1	0.94959	0.57282	-0.75	-1.7647	0.684397	0.95444	0.284407
DOHH	NP_001138637.1	deoxyhypusine hydroxylase [Homo sapiens]	9.212e-05	0.00016829	0.00011163	5.619e-05	8.676e-05	0.00016203	-0.436	-0.7884	1	0.946811	0.585933	0.006	0.012	1	0.835242	0.824318
DIAPH1	NP_001073280.1	1 genes:DIAPH1.NP_001073280.1:protein diaphanous homolog 1 isoform 2 [Homo sapiens] ;NP_001300936.1:protein diaphanous homolog 1 isoform 3 [Homo sapiens] ;NP_005210.3:protein diaphanous homolog 1 isoform 1 [Homo sapiens] ;	1.927e-05	1.207e-05	1.643e-05	5.76e-06	3.77e-06	3.321e-05	-0.436	-0.7403	1	0.942687	0.603335	-0.295	-0.2971	1	0.894593	0.737742
USP48	NP_001317323.1	1 genes:USP48.NP_001317323.1:ubiquitin carboxyl-terminal hydrolase 48 isoform c [Homo sapiens] ;NP_001337095.1:ubiquitin carboxyl-terminal hydrolase 48 isoform 3 [Homo sapiens] ;NP_001337096.1:ubiquitin carboxyl-terminal hydrolase 48 isoform f [Homo sapiens] ;NP_001337097.1:ubiquitin carboxyl-terminal hydrolase 48 isoform g [Homo sapiens] ;NP_115612.4:ubiquitin carboxyl-terminal hydrolase 48 isof…	1.769e-05	1.293e-05	1.319e-05	7.4e-06	1.939e-05	1.185e-05	-0.435	-0.8822	1	0.952884	0.555283	0.011	0.028	1	0.83237	0.827597
TPM3	NP_705935.1	tropomyosin alpha-3 chain isoform Tpm3.1cy [Homo sapiens]	0.00018931	9.478e-05	0.00010719	6.598e-05	0.00012727	9.161e-05	-0.433	-0.9346	1	0.955062	0.542077	-0.221	-0.4105	1	0.910193	0.705999
NQO2	NP_000895.2	1 genes:NQO2.NP_000895.2:ribosyldihydronicotinamide dehydrogenase [quinone] isoform 1 [Homo sapiens] ;NP_001277151.1:ribosyldihydronicotinamide dehydrogenase [quinone] isoform 2 [Homo sapiens] ;	6.022e-05	0	6.736e-05	0	2.062e-05	3.026e-05	-0.433	-0.0927	1	0.855283	0.791317	6.882	2.0963	0.6289	0.232877	0.97521
RPRD1B	NP_067038.1	regulation of nuclear pre-mRNA domain-containing protein 1B [Homo sapiens]	8.401e-05	9.744e-05	4.773e-05	7.436e-05	2.923e-05	3.812e-05	-0.432	-1.2775	0.982432	0.964044	0.433403	-1.009	-2.9242	0.201288	0.895263	0.07114
VPS13B	NP_060360.3	1 genes:VPS13B.NP_060360.3:vacuolar protein sorting-associated protein 13B isoform 5 [Homo sapiens] ;NP_689777.3:vacuolar protein sorting-associated protein 13B isoform 1 [Homo sapiens] ;	1.73e-06	0	1.29e-06	0	0	2.9e-06	-0.432	-0.1115	1	0.857909	0.787804	-0.571	-0.1446	1	0.867249	0.78282
CDC37	NP_008996.1	hsp90 co-chaperone Cdc37 [Homo sapiens]	0.00020241	4.706e-05	8.233e-05	5.131e-05	6.932e-05	6.164e-05	-0.431	-0.5487	1	0.924286	0.663188	-0.34	-0.4882	1	0.920507	0.681466
MAP2K2	NP_109587.1	dual specificity mitogen-activated protein kinase kinase 2 [Homo sapiens]	0.00021798	0.0001207	0.00013471	8.642e-05	8.358e-05	9.321e-05	-0.428	-0.9252	1	0.955054	0.542099	-0.618	-1.5692	0.794476	0.960726	0.335806
IKBKB	NP_001177649.1	1 genes:IKBKB. 1 proteins in this group did not match any genes. NP_001177649.1:inhibitor of nuclear factor kappa-B kinase subunit beta isoform 2 [Homo sapiens] ;NP_001547.1:inhibitor of nuclear factor kappa-B kinase subunit beta isoform 1 [Homo sapiens] ;	5.535e-05	2.696e-05	3.783e-05	1.608e-05	2.211e-05	2.781e-05	-0.428	-0.7177	1	0.941574	0.607694	-0.457	-0.836	1	0.952036	0.570387
GNG5	NP_005265.1	guanine nucleotide-binding protein G(I)/G(S)/G(O) subunit gamma-5 precursor [Homo sapiens]	0	0.00037369	7.628e-05	0	7.006e-05	0.0001028	-0.427	-0.0952	1	0.855284	0.791316	6.284	1.5434	0.941361	0.3861	0.993972
TOM1L2	NP_001076437.1	1 genes:TOM1L2.NP_001076437.1:TOM1-like protein 2 isoform 3 [Homo sapiens] ;NP_001275715.1:TOM1-like protein 2 isoform 4 [Homo sapiens] ;NP_001337261.1:TOM1-like protein 2 isoform 9 [Homo sapiens] ;NP_001337262.1:TOM1-like protein 2 isoform 10 [Homo sapiens] ;	2.744e-05	2.506e-05	2.046e-05	1.434e-05	0	0	-0.425	-1.0734	1	0.960521	0.498211	-17.058	-58.7085	0	0.831958	0
YTHDF3	NP_001264743.1	YTH domain-containing family protein 3 isoform b [Homo sapiens]	4.436e-05	4.418e-05	5.293e-05	1.649e-05	2.431e-05	4.755e-05	-0.425	-0.7611	1	0.944808	0.594654	-0.269	-0.6723	1	0.940068	0.622359
ZBTB2	NP_065912.1	zinc finger and BTB domain-containing protein 2 [Homo sapiens]	2.03e-05	0	0	9.43e-06	9.27e-06	0	-0.425	-0.0993	1	0.855286	0.791316	-0.681	-0.1721	1	0.872136	0.775539
NCL	NP_005372.2	nucleolin [Homo sapiens]	0.00131761	0.00111666	0.00084741	0.00072385	0.00147956	0.00166391	-0.422	-1.3821	0.924406	0.96392	0.399786	0.255	0.619	1	0.679243	0.94055
SYNCRIP	NP_006363.4	heterogeneous nuclear ribonucleoprotein Q isoform 1 [Homo sapiens]	0.00079342	0.00074392	0.0006102	0.00041524	0.00061616	0.00048207	-0.422	-1.2783	0.981991	0.964045	0.433402	-0.341	-1.0131	1	0.960834	0.509409
GCLM	NP_002052.1	glutamate--cysteine ligase regulatory subunit isoform 1 [Homo sapiens]	0.00013962	0.00016693	0.00012304	7.963e-05	0.00011302	0.00019559	-0.422	-1.1558	1	0.962563	0.472079	-0.007	-0.019	1	0.843669	0.814313
ITPA	NP_001311169.1	1 genes:ITPA.NP_001311169.1:inosine triphosphate pyrophosphatase isoform e [Homo sapiens] ;NP_258412.1:inosine triphosphate pyrophosphatase isoform a [Homo sapiens] ;	0.00025201	0.00011048	0.00013155	8.783e-05	0.00010357	0.00015196	-0.422	-0.9046	1	0.95364	0.550866	-0.288	-0.5377	1	0.92673	0.664819
NANS	NP_061819.2	sialic acid synthase [Homo sapiens]	0.00065873	0.00049548	0.00041176	0.00035789	0.00061044	0.00064257	-0.421	-1.1938	1	0.963256	0.459108	0.128	0.3891	1	0.743985	0.904478
CSTF1	NP_001315.1	cleavage stimulation factor subunit 1 [Homo sapiens]	0.00021786	0.0001356	0.00010229	0.00012374	8.843e-05	0.00012975	-0.421	-1.1224	1	0.961973	0.480774	-0.51	-1.0253	1	0.961266	0.505073
ABR	NP_001083.2	active breakpoint cluster region-related protein isoform b [Homo sapiens]	4.729e-05	2.473e-05	3.155e-05	1.77e-05	3.188e-05	3.685e-05	-0.421	-0.803	1	0.947767	0.581562	-0.006	-0.0134	1	0.840892	0.817675
EIF3E	NP_001559.1	eukaryotic translation initiation factor 3 subunit E [Homo sapiens]	0.0004689	0.00035404	0.00028556	0.0002397	0.00025159	0.00023563	-0.42	-1.1686	1	0.962817	0.467747	-0.504	-1.2161	0.997658	0.964824	0.444966
ABLIM1	NP_001309812.1	1 genes:ABLIM1.NP_001309812.1:actin-binding LIM protein 1 isoform e [Homo sapiens] ;NP_001309813.1:actin-binding LIM protein 1 isoform f [Homo sapiens] ;NP_001309814.1:actin-binding LIM protein 1 isoform g [Homo sapiens] ;NP_001309816.1:actin-binding LIM protein 1 isoform i [Homo sapiens] ;NP_001339370.1:actin-binding LIM protein 1 isoform v [Homo sapiens] ;NP_001339371.1:actin-binding LIM protei…	5.092e-05	5.209e-05	2.658e-05	4.259e-05	2.79e-05	3.753e-05	-0.42	-1.1572	1	0.962809	0.46778	-0.445	-1.407	0.887973	0.964261	0.386925
TPM1	NP_001018020.1	tropomyosin alpha-1 chain isoform Tpm1.3sm [Homo sapiens]	0.00030307	0.0001275	0.00015067	0.0001003	0.00018662	0.0001682	-0.42	-0.7368	1	0.942684	0.603341	-0.058	-0.124	1	0.864755	0.786428
ARAF	NP_001243125.1	1 genes:ARAF.NP_001243125.1:serine/threonine-protein kinase A-Raf isoform 2 [Homo sapiens] ;NP_001645.1:serine/threonine-protein kinase A-Raf isoform 1 [Homo sapiens] ;	2.855e-05	3.755e-05	1.703e-05	2.786e-05	5.085e-05	4.209e-05	-0.419	-1.0618	1	0.960511	0.49824	0.34	1.0161	1	0.554566	0.980734
KLC1	NP_001123579.1	kinesin light chain 1 isoform 3 [Homo sapiens]	0.00021226	0.00011513	0.0001189	9.106e-05	0.0001342	0.00015897	-0.419	-0.9303	1	0.955057	0.542084	-0.081	-0.1914	1	0.876887	0.768165
CYLD	NP_001035814.1	1 genes:CYLD.NP_001035814.1:ubiquitin carboxyl-terminal hydrolase CYLD isoform 2 [Homo sapiens] ;NP_056062.1:ubiquitin carboxyl-terminal hydrolase CYLD isoform 1 [Homo sapiens] ;	1.095e-05	5.33e-06	5.44e-06	5.09e-06	0	4.89e-06	-0.418	-0.8407	1	0.949601	0.572795	-8.171	-2.7394	0.254355	0.904394	0.092507
SMG9	NP_061981.2	protein SMG9 [Homo sapiens]	4.682e-05	4.398e-05	5.985e-05	1.399e-05	5.497e-05	3.585e-05	-0.418	-0.6034	1	0.930185	0.646309	-0.032	-0.081	1	0.854471	0.80058
ADSS	NP_001117.2	1 genes:ADSS2.NP_001117.2:adenylosuccinate synthetase isozyme 2 isoform 1 [Homo sapiens] ;NP_001352002.1:adenylosuccinate synthetase isozyme 2 isoform 2 [Homo sapiens] ;	7.627e-05	1.672e-05	3.412e-05	1.595e-05	2.09e-05	5.621e-05	-0.418	-0.5498	1	0.924287	0.663187	0.013	0.0165	1	0.835241	0.824319
CHMP4B	NP_789782.1	charged multivesicular body protein 4b [Homo sapiens]	6.21e-05	0	0	2.164e-05	3.19e-05	1.04e-05	-0.418	-0.1168	1	0.860497	0.784269	7.292	2.0601	0.648307	0.242562	0.97721
TES	NP_056456.1	testin isoform 1 [Homo sapiens]	0.00019825	0.00012072	0.0001232	9.213e-05	3.395e-05	8.856e-05	-0.417	-1.1148	1	0.961652	0.485118	-1.022	-1.7754	0.678511	0.953909	0.280907
WDR11	NP_060587.8	WD repeat-containing protein 11 [Homo sapiens]	3.41e-05	3.114e-05	2.543e-05	1.783e-05	3.114e-05	2.284e-05	-0.416	-1.2356	1	0.963749	0.446211	-0.169	-0.5158	1	0.923686	0.673166
ESF1	NP_001263309.1	ESF1 homolog [Homo sapiens]	1.635e-05	1.792e-05	2.133e-05	5.7e-06	2.239e-05	1.917e-05	-0.416	-0.601	1	0.930183	0.646312	0.169	0.5413	1	0.702751	0.928935
ITPR3	NP_002215.2	inositol 1,4,5-trisphosphate receptor type 3 [Homo sapiens]	2.6e-06	4.76e-06	1.94e-06	2.72e-06	8.92e-06	6.98e-06	-0.415	-0.902	1	0.953638	0.550871	0.816	1.8106	0.787349	0.308678	0.987913
PKM	NP_002645.3	pyruvate kinase PKM isoform a [Homo sapiens]	0.00776491	0.00384756	0.00480227	0.0026107	0.00267365	0.00487967	-0.413	-0.8452	1	0.950458	0.568428	-0.424	-0.8641	1	0.953624	0.56167
ZCCHC24	NP_699198.2	zinc finger CCHC domain-containing protein 24 [Homo sapiens]	5.772e-05	4.218e-05	2.152e-05	5.03e-05	4.942e-05	3.867e-05	-0.413	-0.7999	1	0.947766	0.581573	-0.119	-0.3323	1	0.898696	0.729915
SH3PXD2A	NP_001352008.1	1 genes:SH3PXD2A.NP_001352008.1:SH3 and PX domain-containing protein 2A isoform 2 [Homo sapiens] ;NP_055446.2:SH3 and PX domain-containing protein 2A isoform 1 [Homo sapiens] ;	0	1.002e-05	0	4.78e-06	7.05e-06	1.149e-05	-0.413	-0.1047	1	0.857906	0.787806	6.558	2.1458	0.602758	0.223453	0.973142
ARID4B	NP_057458.4	1 genes:ARID4B.NP_057458.4:AT-rich interactive domain-containing protein 4B isoform 1 [Homo sapiens] ;NP_112739.2:AT-rich interactive domain-containing protein 4B isoform 2 [Homo sapiens] ;	1.59e-05	1.549e-05	1.186e-05	9.24e-06	7.26e-06	3.55e-06	-0.412	-1.2427	1	0.963863	0.44195	-1.093	-2.5052	0.334976	0.916946	0.126514
NQO1	NP_000894.1	1 genes:NQO1.NP_000894.1:NAD(P)H dehydrogenase [quinone] 1 isoform a [Homo sapiens] ;NP_001020604.1:NAD(P)H dehydrogenase [quinone] 1 isoform b [Homo sapiens] ;	0.00057116	0.00044516	0.00035966	0.00032736	0.00016518	0.00051875	-0.411	-1.3139	0.962331	0.964145	0.420707	-0.513	-0.8645	1	0.953624	0.56167
SOD1	NP_000445.1	superoxide dismutase [Cu-Zn] [Homo sapiens]	0.00135495	0.00183158	0.00099356	0.0010547	0.0012529	0.00119533	-0.411	-1.2892	0.975984	0.964097	0.429159	-0.223	-0.621	1	0.935112	0.639462
ILF3	NP_001131145.1	interleukin enhancer-binding factor 3 isoform e [Homo sapiens]	0.000798	0.00047151	0.00043345	0.00035711	0.00142676	0.00053798	-0.41	-1.0901	1	0.96129	0.489502	0.38	0.6646	1	0.663222	0.947622
ABCF3	NP_001338227.1	1 genes:ABCF3.NP_001338227.1:ATP-binding cassette sub-family F member 3 isoform 2 [Homo sapiens] ;NP_060828.2:ATP-binding cassette sub-family F member 3 isoform 1 [Homo sapiens] ;	4.947e-05	6.506e-05	5.165e-05	2.759e-05	4.744e-05	1.326e-05	-0.409	-0.795	1	0.946815	0.585918	-0.81	-1.1834	1	0.964584	0.453476
	NP_001333742.1	AT-rich interactive domain-containing protein 1B isoform 3 [Homo sapiens]	2.583e-05	1.361e-05	7.93e-06	1.84e-05	1.833e-05	1.967e-05	-0.409	-0.7441	1	0.942693	0.603333	0.047	0.099	1	0.817555	0.843553
NTN4	NP_001316629.1	1 genes:NTN4.NP_001316629.1:netrin-4 isoform 2 precursor [Homo sapiens] ;NP_001316631.1:netrin-4 isoform 3 [Homo sapiens] ;NP_067052.2:netrin-4 isoform 1 precursor [Homo sapiens] ;	0	2.1e-05	0	2.003e-05	7.87e-06	1.541e-05	-0.409	-0.1116	1	0.857909	0.787804	6.011	1.6358	0.888021	0.358218	0.992603
GSPT1	NP_001123478.2	1 genes:GSPT1.NP_001123478.2:eukaryotic peptide chain release factor GTP-binding subunit ERF3A isoform 2 [Homo sapiens] ;NP_002085.3:eukaryotic peptide chain release factor GTP-binding subunit ERF3A isoform 1 [Homo sapiens] ;	0.00021872	0.00015582	0.00013456	0.00011435	4.869e-05	0.00013189	-0.408	-1.3505	0.942012	0.964066	0.408132	-0.897	-1.2793	0.961585	0.965052	0.42396
CFL2	NP_001230574.1	cofilin-2 isoform 2 [Homo sapiens]	0.00031066	0.00029154	0.00019198	0.00021813	0.0001544	0.00031515	-0.406	-1.3222	0.95773	0.964137	0.416519	-0.347	-0.8128	1	0.951193	0.574765
FKBP1A	NP_463460.1	peptidyl-prolyl cis-trans isomerase FKBP1A isoform a [Homo sapiens]	0.0033489	0.00258817	0.00223318	0.00184062	0.00176449	0.00241643	-0.406	-1.1691	1	0.962818	0.467746	-0.344	-1.0025	1	0.960378	0.513744
CAD	NP_001293008.1	1 genes:CAD.NP_001293008.1:CAD protein isoform 2 [Homo sapiens] ;NP_004332.2:CAD protein isoform 1 [Homo sapiens] ;	7.882e-05	4.936e-05	5.398e-05	3.252e-05	3.966e-05	5.281e-05	-0.406	-1.0808	1	0.960916	0.493851	-0.323	-0.8433	1	0.952837	0.56604
FAM50A	NP_004690.1	protein FAM50A [Homo sapiens]	0.0001744	9.745e-05	9.18e-05	8.581e-05	7.729e-05	0.0001306	-0.406	-0.8514	1	0.950464	0.568416	-0.238	-0.4964	1	0.922109	0.677332
RBM7	NP_057174.1	RNA-binding protein 7 isoform b [Homo sapiens]	0.00010982	7.642e-05	0.00010446	4.101e-05	0.00014428	0.00010512	-0.404	-0.5252	1	0.922724	0.667392	0.271	0.7473	1	0.638764	0.957211
CENPV	NP_859067.2	centromere protein V [Homo sapiens]	0.00011507	0.00010277	5.721e-05	9.804e-05	0.00018391	8.567e-05	-0.403	-1.11	1	0.961646	0.485124	0.149	0.3129	1	0.765316	0.889418
RPS13	NP_001008.1	40S ribosomal protein S13 [Homo sapiens]	0.0011055	0.00072363	0.00058394	0.00059402	0.00104117	0.00100304	-0.402	-1.1281	1	0.961979	0.480765	0.138	0.4285	1	0.732999	0.911555
EWSR1	NP_001156757.1	1 genes:EWSR1.NP_001156757.1:RNA-binding protein EWS isoform 3 [Homo sapiens] ;NP_001156758.1:RNA-binding protein EWS isoform 4 [Homo sapiens] ;NP_005234.1:RNA-binding protein EWS isoform 2 [Homo sapiens] ;NP_053733.2:RNA-binding protein EWS isoform 1 [Homo sapiens] ;	0.00028671	0.00018622	0.00013462	0.00017765	0.00022911	0.0001423	-0.401	-1.0393	1	0.959633	0.506973	-0.222	-0.5374	1	0.92673	0.664819
ZNF316	NP_001265488.1	zinc finger protein 316 [Homo sapiens]	3.117e-05	1.952e-05	2.21e-05	1.38e-05	2.135e-05	1.741e-05	-0.4	-0.9343	1	0.955061	0.542078	-0.236	-0.6425	1	0.937649	0.630937
NABP2	NP_076973.1	SOSS complex subunit B1 [Homo sapiens]	0	2.409e-05	0	3.447e-05	5.645e-05	0	-0.4	-0.1014	1	0.857905	0.787808	-1.108	-0.3211	1	0.89869	0.729928
PRPF4	NP_001231855.1	1 genes:PRPF4.NP_001231855.1:U4/U6 small nuclear ribonucleoprotein Prp4 isoform 2 [Homo sapiens] ;NP_004688.2:U4/U6 small nuclear ribonucleoprotein Prp4 isoform 1 [Homo sapiens] ;	0.00034043	0.00027313	0.00019911	0.00020939	0.00019203	0.00020126	-0.398	-1.2543	0.995179	0.963961	0.43769	-0.441	-1.4191	0.880978	0.964082	0.382888
TPM1	NP_001018006.1	tropomyosin alpha-1 chain isoform Tpm1.7cy [Homo sapiens]	0.00037655	0.00015435	0.00017624	0.00014469	0.00022185	0.00021168	-0.398	-0.8601	1	0.951297	0.56404	-0.107	-0.2356	1	0.883776	0.756919
DIEXF	NP_055203.4	digestive organ expansion factor homolog [Homo sapiens]	4.14e-05	5.378e-05	2.058e-05	4.81e-05	3.151e-05	2.774e-05	-0.398	-0.7886	1	0.946811	0.585933	-0.464	-1.2492	0.978807	0.964984	0.436514
MYO5A	NP_000250.3	1 genes:MYO5A.NP_000250.3:unconventional myosin-Va isoform 1 [Homo sapiens] ;NP_001135967.2:unconventional myosin-Va isoform 2 [Homo sapiens] ;	2.062e-05	1.918e-05	1.398e-05	1.307e-05	8.99e-06	2.261e-05	-0.397	-1.3054	0.967034	0.964135	0.42492	-0.349	-0.6231	1	0.935115	0.63946
CELF1	NP_001020767.1	1 genes:CELF1.NP_001020767.1:CUGBP Elav-like family member 1 isoform 3 [Homo sapiens] ;NP_001317201.1:CUGBP Elav-like family member 1 isoform 6 [Homo sapiens] ;NP_001363307.1:CUGBP Elav-like family member 1 isoform 7 [Homo sapiens] ;NP_001363315.1:CUGBP Elav-like family member 1 isoform 8 [Homo sapiens] ;NP_001363320.1:CUGBP Elav-like family member 1 isoform 9 [Homo sapiens] ;NP_001363339.1:CUGBP…	0.00027908	0.0002928	0.0001921	0.0002095	0.00022056	0.00019657	-0.397	-1.1828	1	0.96305	0.463422	-0.309	-1.0494	1	0.961682	0.500709
HEXA	NP_000511.2	beta-hexosaminidase subunit alpha isoform 2 preproprotein [Homo sapiens]	0.00024982	0.00021616	0.00013727	0.00018331	0.00013509	0.00017179	-0.397	-1.1722	1	0.963041	0.463449	-0.413	-1.3558	0.917555	0.964683	0.399173
ZHX1	NP_009153.3	zinc fingers and homeoboxes protein 1 [Homo sapiens]	7.97e-06	0	0	5.55e-06	1.091e-05	5.34e-06	-0.397	-0.1089	1	0.857907	0.787804	4.781	1.0342	1	0.545998	0.982411
TGFB1I1	NP_001035919.1	1 genes:TGFB1I1.NP_001035919.1:transforming growth factor beta-1-induced transcript 1 protein isoform 1 [Homo sapiens] ;NP_057011.2:transforming growth factor beta-1-induced transcript 1 protein isoform 2 [Homo sapiens] ;	0.00027912	0.00031971	0.00016877	0.00023138	0.00014985	0.00024767	-0.396	-0.9608	1	0.956367	0.533292	-0.458	-1.2404	0.98383	0.964976	0.436532
METTL1	NP_005362.3	tRNA (guanine-N(7)-)-methyltransferase isoform a [Homo sapiens]	8.82e-05	1.841e-05	3.759e-05	1.757e-05	6.905e-05	7.598e-05	-0.395	-0.5874	1	0.928757	0.650551	0.638	0.5318	1	0.702745	0.928942
ZKSCAN8	NP_006289.2	zinc finger protein with KRAB and SCAN domains 8 isoform 1 [Homo sapiens]	3.61e-05	4.396e-05	2.243e-05	2.936e-05	8.24e-06	2.419e-05	-0.394	-1.0397	1	0.959633	0.506972	-1.045	-2.0893	0.515177	0.939025	0.204074
MMP2	NP_004521.1	72 kDa type IV collagenase isoform 1 preproprotein [Homo sapiens]	3.162e-05	5.775e-05	3.536e-05	2.204e-05	2.166e-05	0	-0.394	-0.8783	1	0.95211	0.559645	-7.847	-2.2314	0.448475	0.932031	0.176336
C11orf68	NP_001129107.1	1 genes:C11orf68.NP_001129107.1:UPF0696 protein C11orf68 isoform 1 [Homo sapiens] ;NP_113638.2:UPF0696 protein C11orf68 isoform 2 [Homo sapiens] ;	0.00014243	6.071e-05	9.736e-05	4.137e-05	4.065e-05	4.772e-05	-0.393	-0.6454	1	0.934271	0.63352	-0.742	-1.4595	0.857626	0.963451	0.37087
TOP3B	NP_001269041.1	1 genes:TOP3B.NP_001269041.1:DNA topoisomerase 3-beta-1 isoform 1 [Homo sapiens] ;NP_001336777.1:DNA topoisomerase 3-beta-1 isoform 2 [Homo sapiens] ;	2.824e-05	2.358e-05	2.106e-05	1.406e-05	2.763e-05	1.892e-05	-0.392	-1.0086	1	0.958647	0.51575	-0.126	-0.1076	1	0.85968	0.793553
FAM120A	NP_055427.2	constitutive coactivator of PPAR-gamma-like protein 1 isoform a [Homo sapiens]	7.466e-05	4.546e-05	2.784e-05	5.744e-05	4.155e-05	4.029e-05	-0.392	-0.8077	1	0.94777	0.581551	-0.341	-0.9277	1	0.957096	0.539865
DCUN1D5	NP_001305668.1	1 genes:DCUN1D5.NP_001305668.1:DCN1-like protein 5 isoform b [Homo sapiens] ;NP_001305669.1:DCN1-like protein 5 isoform c [Homo sapiens] ;NP_115675.1:DCN1-like protein 5 isoform a [Homo sapiens] ;	6.21e-05	0.00015126	4.631e-05	0.00010101	0.00015597	0.00016644	-0.392	-0.5863	1	0.928756	0.650552	0.529	1.0377	1	0.546008	0.982409
ZEB2	NP_001165124.1	zinc finger E-box-binding homeobox 2 isoform 2 [Homo sapiens]	4.676e-05	1.281e-05	1.308e-05	2.037e-05	1.601e-05	1.41e-05	-0.392	-0.5007	1	0.919512	0.675713	-0.509	-0.6329	1	0.936397	0.635201
JAK1	NP_001308782.1	tyrosine-protein kinase JAK1 isoform 1 [Homo sapiens]	6.03e-06	8.81e-06	2.25e-06	8.4e-06	2.06e-06	0	-0.391	-0.4918	1	0.917859	0.679846	-7.832	-2.5088	0.333622	0.916946	0.12651
STXBP1	NP_001027392.1	syntaxin-binding protein 1 isoform b [Homo sapiens]	6.44e-05	4.706e-05	5.239e-05	2.449e-05	1.203e-05	1.569e-05	-0.39	-0.7767	1	0.945825	0.590291	-1.373	-3.7141	0.062726	0.86559	0.019187
TPI1	NP_000356.1	1 genes:TPI1.NP_000356.1:triosephosphate isomerase isoform 1 [Homo sapiens] ;NP_001152759.1:triosephosphate isomerase isoform 2 [Homo sapiens] ;	0.00194137	0.00185736	0.00135397	0.00120725	0.00144454	0.00243307	-0.389	-1.2633	0.990241	0.963967	0.437662	-0.009	-0.0232	1	0.84367	0.814311
RHOG	NP_001656.2	rho-related GTP-binding protein RhoG precursor [Homo sapiens]	0.00010925	5.322e-05	5.431e-05	5.077e-05	2.57e-05	4.88e-05	-0.389	-0.8512	1	0.950463	0.568416	-0.776	-1.507	0.830216	0.962384	0.355101
PDLIM2	NP_001355049.1	1 genes:PDLIM2.NP_001355049.1:PDZ and LIM domain protein 2 isoform 4 [Homo sapiens] ;NP_067643.3:PDZ and LIM domain protein 2 isoform 2 [Homo sapiens] ;	6.916e-05	2.888e-05	2.947e-05	3.444e-05	0	3.31e-05	-0.389	-0.6282	1	0.932938	0.637798	-7.665	-2.203	0.461399	0.93345	0.181673
SEC23B	NP_001166217.1	protein transport protein Sec23B isoform 2 [Homo sapiens]	0.0001492	0.00012678	0.00011226	7.611e-05	0.00010798	9.333e-05	-0.388	-1.1762	1	0.963043	0.463434	-0.319	-1.094	1	0.963058	0.483438
LRRC41	NP_006360.3	leucine-rich repeat-containing protein 41 [Homo sapiens]	5.139e-05	3.755e-05	3.833e-05	2.388e-05	3.52e-05	4.017e-05	-0.387	-1.0405	1	0.959634	0.50697	-0.145	-0.4377	1	0.913763	0.697884
DDA1	NP_076955.1	DET1- and DDB1-associated protein 1 [Homo sapiens]	0.00020457	0.00022422	0.00015255	0.0001426	0.00018683	0.00013707	-0.384	-1.3541	0.94001	0.964068	0.408116	-0.285	-0.8939	1	0.955782	0.548606
FUCA1	NP_000138.2	tissue alpha-L-fucosidase precursor [Homo sapiens]	0.00011194	0.00019631	6.678e-05	0.00014566	0.00014313	0.00012501	-0.384	-0.6842	1	0.938065	0.62064	-0.071	-0.1779	1	0.874526	0.771866
NF2	NP_000259.1	1 genes:NF2.NP_000259.1:merlin isoform 1 [Homo sapiens] ;NP_057502.2:merlin isoform 2 [Homo sapiens] ;	8.183e-05	1.708e-05	2.615e-05	2.037e-05	1.201e-05	0	-0.384	-0.3847	1	0.903414	0.712369	-9.059	-3.0528	0.169558	0.889774	0.059524
LDHA	NP_001158886.1	L-lactate dehydrogenase A chain isoform 3 [Homo sapiens]	0.00708237	0.00503784	0.00505588	0.00321889	0.00232351	0.00534983	-0.383	-0.9976	1	0.958117	0.520128	-0.557	-1.0088	1	0.960384	0.513732
BNC2	NP_001304869.1	1 genes:BNC2.NP_001304869.1:zinc finger protein basonuclin-2 isoform 3 [Homo sapiens] ;NP_060107.3:zinc finger protein basonuclin-2 isoform 1 [Homo sapiens] ;	2.078e-05	1.012e-05	1.033e-05	9.66e-06	7.12e-06	0	-0.382	-0.8175	1	0.948694	0.577187	-8.035	-2.2616	0.434962	0.929888	0.168546
ANKRD17	NP_001273700.1	ankyrin repeat domain-containing protein 17 isoform c [Homo sapiens]	5.59e-06	6.12e-06	2.08e-06	7.3e-06	1.91e-06	6.64e-06	-0.382	-0.5873	1	0.928757	0.650551	-0.522	-0.8714	1	0.954367	0.557317
SPC25	NP_065726.1	kinetochore protein Spc25 [Homo sapiens]	7.763e-05	2.269e-05	2.316e-05	3.247e-05	0.00010634	7.282e-05	-0.382	-0.5525	1	0.924291	0.663186	0.757	1.0002	1	0.558833	0.979858
MRPL27	NP_057588.1	39S ribosomal protein L27, mitochondrial [Homo sapiens]	0.00021148	0.00024038	0.00014018	0.0001638	0.00017705	0.00022042	-0.381	-1.2208	1	0.963606	0.450502	-0.128	-0.4109	1	0.910194	0.705999
MRPL22	NP_054899.2	39S ribosomal protein L22, mitochondrial isoform a [Homo sapiens]	8.441e-05	8.635e-05	5.036e-05	7.061e-05	4.625e-05	0.00011311	-0.38	-1.2483	0.998468	0.963867	0.441933	-0.174	-0.3478	1	0.902654	0.72203
HSPB1	NP_001531.1	heat shock protein beta-1 [Homo sapiens]	0.00125537	0.00094207	0.00080964	0.00066223	0.00074367	0.00118211	-0.38	-1.2293	1	0.963744	0.446228	-0.152	-0.3887	1	0.908354	0.710042
MYO6	NP_001287828.1	1 genes:MYO6.NP_001287828.1:unconventional myosin-VI isoform 2 [Homo sapiens] ;NP_001355065.1:unconventional myosin-VI isoform 3 [Homo sapiens] ;NP_001355067.1:unconventional myosin-VI isoform 5 [Homo sapiens] ;	3.858e-05	2.819e-05	3.288e-05	1.537e-05	2.076e-05	2.031e-05	-0.38	-0.6523	1	0.935562	0.629247	-0.495	-1.499	0.834826	0.962676	0.359007
TXNRD1	NP_001087240.1	thioredoxin reductase 1, cytoplasmic isoform 5 [Homo sapiens]	0.00080914	0.00060298	0.00055144	0.00043703	0.00053531	0.00066421	-0.379	-1.0701	1	0.960516	0.498214	-0.203	-0.5615	1	0.92965	0.656421
LDHB	NP_001302466.1	L-lactate dehydrogenase B chain isoform LDHBx [Homo sapiens]	0.00523004	0.00263281	0.00297526	0.00209483	0.00190616	0.00319908	-0.379	-0.7175	1	0.941574	0.607695	-0.382	-0.8166	1	0.951194	0.574752
ABLIM3	NP_001287944.1	1 genes:ABLIM3.NP_001287944.1:actin-binding LIM protein 3 isoform 1 [Homo sapiens] ;NP_001287957.1:actin-binding LIM protein 3 isoform 4 [Homo sapiens] ;NP_001332787.1:actin-binding LIM protein 3 isoform 5 [Homo sapiens] ;NP_001332790.1:actin-binding LIM protein 3 isoform 6 [Homo sapiens] ;NP_001357346.1:actin-binding LIM protein 3 isoform 2 [Homo sapiens] ;NP_001357347.1:actin-binding LIM protei…	2.546e-05	3.721e-05	1.139e-05	3.904e-05	3.836e-05	4.094e-05	-0.379	-0.6338	1	0.932944	0.637793	0.27	0.7795	1	0.630511	0.960136
OSBPL2	NP_001265578.1	1 genes:OSBPL2.NP_001265578.1:oxysterol-binding protein-related protein 2 isoform 3 [Homo sapiens] ;NP_001350807.1:oxysterol-binding protein-related protein 2 isoform 4 [Homo sapiens] ;NP_055650.1:oxysterol-binding protein-related protein 2 isoform 1 [Homo sapiens] ;NP_653081.1:oxysterol-binding protein-related protein 2 isoform 2 [Homo sapiens] ;	2.82e-05	4.121e-05	2.103e-05	2.621e-05	2.575e-05	3.149e-05	-0.378	-1.1119	1	0.961648	0.485121	-0.151	-0.4296	1	0.913757	0.697895
RPL38	NP_001030335.1	60S ribosomal protein L38 [Homo sapiens]	0.00288153	0.00152467	0.00163012	0.00114285	0.00163341	0.00126493	-0.378	-0.8741	1	0.952106	0.559652	-0.359	-0.8561	1	0.953615	0.561682
GARS	NP_001303701.1	1 genes:GARS1.NP_001303701.1:glycine--tRNA ligase isoform 2 [Homo sapiens] ;NP_002038.2:glycine--tRNA ligase isoform 1 precursor [Homo sapiens] ;	0.00039092	0.00024484	0.00020823	0.00022296	0.00023647	0.00028914	-0.377	-1.0148	1	0.958652	0.515733	-0.153	-0.3809	1	0.906489	0.714047
PRPS1	NP_002755.1	ribose-phosphate pyrophosphokinase 1 isoform 1 [Homo sapiens]	0.00044838	0.00021575	0.00029359	0.00015247	0.00021723	0.00024913	-0.377	-0.5933	1	0.928764	0.650546	-0.306	-0.6343	1	0.936398	0.635199
SNX12	NP_001243117.1	1 genes:SNX12.NP_001243117.1:sorting nexin-12 isoform 4 [Homo sapiens] ;NP_037478.2:sorting nexin-12 isoform 1 [Homo sapiens] ;	0.00026413	0.00053074	0.00019696	0.00029152	0.00018092	0.00029495	-0.377	-0.5454	1	0.924283	0.663192	-0.488	-0.7924	1	0.949439	0.583447
SAP30	NP_003855.1	histone deacetylase complex subunit SAP30 [Homo sapiens]	0.00017389	9.24e-05	0.00010609	6.612e-05	0.00012993	7.414e-05	-0.375	-0.7503	1	0.943762	0.598997	-0.307	-0.4827	1	0.920503	0.681475
TWF2	NP_009215.1	twinfilin-2 [Homo sapiens]	0.00039329	0.00028846	0.00025826	0.00021373	0.00033862	0.0003193	-0.374	-1.0659	1	0.960513	0.498224	-0.028	-0.0892	1	0.857089	0.797081
UBR4	NP_065816.2	E3 ubiquitin-protein ligase UBR4 [Homo sapiens]	2.617e-05	1.079e-05	1.551e-05	7.95e-06	7.81e-06	1.618e-05	-0.374	-0.6157	1	0.931577	0.642059	-0.405	-0.7034	1	0.942366	0.613751
POGK	NP_001300943.1	1 genes:POGK.NP_001300943.1:pogo transposable element with KRAB domain isoform 2 [Homo sapiens] ;NP_060012.3:pogo transposable element with KRAB domain isoform 1 [Homo sapiens] ;	3.541e-05	4.658e-05	2.113e-05	3.95e-05	1.455e-05	5.22e-05	-0.373	-0.8322	1	0.949591	0.572807	-0.319	-0.4591	1	0.917197	0.68971
BOD1L1	NP_683692.2	biorientation of chromosomes in cell division protein 1-like 1 [Homo sapiens]	3.306e-05	1.499e-05	1.36e-05	1.669e-05	1.64e-05	1.833e-05	-0.373	-0.8104	1	0.947774	0.581548	-0.264	-0.5967	1	0.932449	0.647955
SNRPA	NP_004587.1	U1 small nuclear ribonucleoprotein A [Homo sapiens]	0.00028364	0.00039198	0.00017473	0.00030088	0.00035715	0.00033051	-0.373	-0.7784	1	0.945826	0.590287	0.039	0.1212	1	0.811421	0.849725
BTF3L4	NP_689478.1	transcription factor BTF3 homolog 4 isoform 1 [Homo sapiens]	0.00026413	0.00038599	0.00032827	0.00015343	0.00013569	0.0003097	-0.372	-0.6214	1	0.932935	0.637815	-0.448	-0.7602	1	0.947562	0.592148
DARS2	NP_060592.2	aspartate--tRNA ligase, mitochondrial isoform 1 [Homo sapiens]	0.00015097	9.455e-05	7.237e-05	9.02e-05	7.386e-05	9.754e-05	-0.371	-0.9109	1	0.954359	0.546495	-0.316	-0.6889	1	0.941233	0.618057
B4GALT1	NP_001488.2	beta-1,4-galactosyltransferase 1 [Homo sapiens]	2.621e-05	1.277e-05	1.303e-05	1.218e-05	2.394e-05	1.756e-05	-0.371	-0.8251	1	0.948701	0.577173	0.1	0.1985	1	0.792321	0.867502
RDH11	NP_057110.3	retinol dehydrogenase 11 isoform 1 precursor [Homo sapiens]	6.562e-05	3.196e-05	3.262e-05	3.049e-05	2.996e-05	2.931e-05	-0.371	-0.8126	1	0.947777	0.581546	-0.434	-0.9914	1	0.959897	0.518087
RPS28	NP_001022.1	40S ribosomal protein S28 [Homo sapiens]	0.00020161	0.00011048	0.00015034	7.027e-05	0.00024166	0.00013508	-0.371	-0.6374	1	0.934265	0.633534	0.195	0.2749	1	0.775643	0.881442
UBE2Z	NP_075567.2	ubiquitin-conjugating enzyme E2 Z [Homo sapiens]	5.894e-05	1.436e-05	2.93e-05	1.37e-05	0	3.291e-05	-0.371	-0.516	1	0.921135	0.671553	-6.284	-2.0454	0.536778	0.941734	0.215861
CTSZ	NP_001327.2	cathepsin Z preproprotein [Homo sapiens]	5.739e-05	7.548e-05	5.135e-05	4e-05	0.00012579	3.845e-05	-0.369	-1.1107	1	0.961647	0.485122	0.073	0.1224	1	0.811421	0.849725
RPL15	NP_001240312.1	60S ribosomal protein L15 isoform 1 [Homo sapiens]	0.00138085	0.00092178	0.00063563	0.00091503	0.00057216	0.00073102	-0.369	-0.9903	1	0.957566	0.524507	-0.601	-1.6869	0.72768	0.957407	0.305904
LSM5	NP_001124182.1	1 genes:LSM5.NP_001124182.1:U6 snRNA-associated Sm-like protein LSm5 isoform b [Homo sapiens] ;NP_036454.1:U6 snRNA-associated Sm-like protein LSm5 isoform a [Homo sapiens] ;	0.00218759	0.00262308	0.0011712	0.00218963	0.00142155	0.0017288	-0.369	-0.9268	1	0.955054	0.542094	-0.395	-1.1737	1	0.964434	0.457716
PNO1	NP_001316845.1	1 genes:PNO1.NP_001316845.1:RNA-binding protein PNO1 isoform 2 [Homo sapiens] ;NP_001316846.1:RNA-binding protein PNO1 isoform 3 [Homo sapiens] ;NP_064528.1:RNA-binding protein PNO1 isoform 1 [Homo sapiens] ;	0.00014163	5.749e-05	9.388e-05	4.388e-05	0	2.109e-05	-0.368	-0.6298	1	0.932939	0.637796	-8.974	-2.9851	0.185748	0.892784	0.065773
XPOT	NP_009166.2	exportin-T [Homo sapiens]	8.315e-05	2.113e-05	5.931e-05	1.512e-05	4.457e-05	4.602e-05	-0.368	-0.4334	1	0.9109	0.696254	0.15	0.217	1	0.789041	0.870354
DHX57	NP_945314.1	putative ATP-dependent RNA helicase DHX57 isoform 1 [Homo sapiens]	2.258e-05	3.117e-05	1.871e-05	1.749e-05	2.75e-05	2.186e-05	-0.367	-1.1403	1	0.962281	0.47642	-0.035	-0.083	1	0.857087	0.797084
PAK2	NP_002568.2	serine/threonine-protein kinase PAK 2 [Homo sapiens]	0.00018928	0.00015033	0.00013794	0.00010641	0.00013638	0.00023123	-0.367	-0.9937	1	0.958116	0.520142	0.07	0.1744	1	0.798802	0.861702
GAK	NP_001305063.1	1 genes:GAK.NP_001305063.1:cyclin-G-associated kinase isoform 3 [Homo sapiens] ;NP_005246.2:cyclin-G-associated kinase isoform 1 [Homo sapiens] ;	3.952e-05	8.25e-06	1.474e-05	1.377e-05	1.547e-05	2.08e-05	-0.367	-0.3798	1	0.90341	0.712373	-0.015	-0.0211	1	0.843669	0.814312
EIF5	NP_001960.2	eukaryotic translation initiation factor 5 [Homo sapiens]	0.00024207	0.0001474	0.00014441	0.00012374	7.738e-05	0.00014597	-0.366	-0.9871	1	0.957562	0.52451	-0.6	-1.2683	0.967888	0.965048	0.428131
NRBP1	NP_001308286.1	1 genes:NRBP1.NP_001308286.1:nuclear receptor-binding protein isoform 1 [Homo sapiens] ;NP_001308288.1:nuclear receptor-binding protein isoform 2 [Homo sapiens] ;NP_001308290.1:nuclear receptor-binding protein isoform 3 [Homo sapiens] ;NP_001308291.1:nuclear receptor-binding protein isoform 4 [Homo sapiens] ;NP_001308292.1:nuclear receptor-binding protein isoform 5 [Homo sapiens] ;	5.85e-05	8.55e-05	6.302e-05	3.625e-05	1.781e-05	6.098e-05	-0.366	-0.772	1	0.944818	0.594636	-0.705	-0.9689	1	0.958859	0.526787
SYNJ2	NP_001171559.1	1 genes:SYNJ2.NP_001171559.1:synaptojanin-2 isoform 2 [Homo sapiens] ;NP_003889.1:synaptojanin-2 isoform 1 [Homo sapiens] ;	2.762e-05	1.009e-05	1.442e-05	9.63e-06	9.46e-06	2.036e-05	-0.366	-0.6882	1	0.938069	0.620636	-0.169	-0.2769	1	0.890368	0.745473
OTUD6B	NP_057107.4	deubiquitinase OTUD6B isoform 1 [Homo sapiens]	8.309e-05	1.735e-05	5.311e-05	1.655e-05	2.439e-05	2.386e-05	-0.366	-0.2047	1	0.875353	0.762485	-0.465	-0.6274	1	0.936394	0.635214
IMP4	NP_001307233.1	1 genes:IMP4.NP_001307233.1:U3 small nucleolar ribonucleoprotein protein IMP4 isoform b [Homo sapiens] ;NP_001307234.1:U3 small nucleolar ribonucleoprotein protein IMP4 isoform c [Homo sapiens] ;NP_001307235.1:U3 small nucleolar ribonucleoprotein protein IMP4 isoform d [Homo sapiens] ;NP_001307240.1:U3 small nucleolar ribonucleoprotein protein IMP4 isoform f [Homo sapiens] ;NP_001358654.1:U3 smal…	0.00015644	7.034e-05	5.384e-05	0.00010905	4.945e-05	9.675e-05	-0.365	-0.5568	1	0.925805	0.658996	-0.402	-0.6893	1	0.941234	0.618057
PEX19	NP_001180573.1	1 genes:PEX19.NP_001180573.1:peroxisomal biogenesis factor 19 isoform c [Homo sapiens] ;NP_002848.1:peroxisomal biogenesis factor 19 isoform a [Homo sapiens] ;	4.986e-05	3.643e-05	3.718e-05	2.607e-05	6.83e-05	3.341e-05	-0.364	-1.0056	1	0.958127	0.520117	0.095	0.2098	1	0.792323	0.8675
RPL19	NP_000972.1	1 genes:RPL19.NP_000972.1:60S ribosomal protein L19 isoform 1 [Homo sapiens] ;NP_001317129.1:60S ribosomal protein L19 isoform 2 [Homo sapiens] ;	0.0008162	0.00066121	0.00043664	0.00060606	0.00068059	0.00076086	-0.363	-1.1294	1	0.962273	0.476453	0	0.0013	1	0.838082	0.821011
MDH1	NP_001186040.1	1 genes:MDH1.NP_001186040.1:malate dehydrogenase, cytoplasmic isoform 2 [Homo sapiens] ;NP_001303303.1:malate dehydrogenase, peroxisomal isoform MDH1x [Homo sapiens] ;NP_005908.1:malate dehydrogenase, cytoplasmic isoform MDH1 [Homo sapiens] ;	0.00035567	0.00020935	0.0002947	0.00013085	0.00021655	0.00024493	-0.363	-0.6909	1	0.939263	0.616343	-0.154	-0.4277	1	0.913757	0.697899
ELAVL1	NP_001410.2	ELAV-like protein 1 [Homo sapiens]	0.0005974	0.00070153	0.00046935	0.0004313	0.00043111	0.00034309	-0.362	-1.1819	1	0.963049	0.463422	-0.426	-0.715	1	0.943465	0.60944
CRKL	NP_005198.1	crk-like protein [Homo sapiens]	0.00019512	0.00015096	0.00012838	0.00010401	7.862e-05	0.00014611	-0.362	-1.1029	1	0.961642	0.485148	-0.455	-1.0796	1	0.962748	0.487756
CCDC22	NP_054727.1	coiled-coil domain-containing protein 22 [Homo sapiens]	9.429e-05	7.295e-05	6.618e-05	5.026e-05	8.738e-05	6.318e-05	-0.361	-1.2385	1	0.963752	0.446209	-0.113	-0.3274	1	0.898692	0.729919
ARSK	NP_937793.1	arylsulfatase K precursor [Homo sapiens]	1.946e-05	9.48e-06	9.68e-06	9.05e-06	1.333e-05	0	-0.361	-0.8564	1	0.951295	0.564052	-6.23	-1.807	0.66123	0.952266	0.27057
IGFBP7	NP_001240764.1	1 genes:IGFBP7.NP_001240764.1:insulin-like growth factor-binding protein 7 isoform 2 precursor [Homo sapiens] ;NP_001544.1:insulin-like growth factor-binding protein 7 isoform 1 precursor [Homo sapiens] ;	0.00033655	0.00019127	0.00022309	0.00013902	0.00029882	0.00010857	-0.361	-0.8467	1	0.950459	0.568424	-0.361	-0.6161	1	0.935109	0.639471
RPL27A	NP_000981.1	60S ribosomal protein L27a [Homo sapiens]	0.00086943	0.00051509	0.00059577	0.00037674	0.00088523	0.00050381	-0.36	-0.8979	1	0.953636	0.550884	0.052	0.0755	1	0.823571	0.83726
DNAJA3	NP_001128582.1	1 genes:DNAJA3.NP_001128582.1:dnaJ homolog subfamily A member 3, mitochondrial isoform 2 [Homo sapiens] ;NP_005138.3:dnaJ homolog subfamily A member 3, mitochondrial isoform 1 [Homo sapiens] ;	3.839e-05	9.536e-05	2.29e-05	7.492e-05	0.00014724	6.687e-05	-0.36	-0.4518	1	0.912693	0.692173	0.45	0.7791	1	0.63051	0.960136
OXSR1	NP_005100.1	serine/threonine-protein kinase OSR1 [Homo sapiens]	0.00010841	3.255e-05	6.889e-05	2.147e-05	0	5.168e-05	-0.36	-0.4073	1	0.907223	0.704349	-8.345	-2.2175	0.454774	0.932741	0.178991
GALK1	NP_000145.1	galactokinase [Homo sapiens]	7.985e-05	8.427e-05	6.616e-05	4.947e-05	6.684e-05	0.00014266	-0.359	-0.9697	1	0.956974	0.52891	0.154	0.3509	1	0.754761	0.897098
CLNS1A	NP_001284.1	1 genes:CLNS1A.NP_001284.1:methylosome subunit pICln isoform a [Homo sapiens] ;NP_001298129.1:methylosome subunit pICln isoform b [Homo sapiens] ;NP_001298130.1:methylosome subunit pICln isoform c [Homo sapiens] ;NP_001298131.1:methylosome subunit pICln isoform d [Homo sapiens] ;	0.00032283	0.00015011	0.00017508	0.00012275	0.00011056	0.00014748	-0.359	-0.7685	1	0.944813	0.594638	-0.535	-1.0069	1	0.960382	0.513734
TGFB2	NP_001129071.1	transforming growth factor beta-2 proprotein isoform 1 precursor [Homo sapiens]	4.721e-05	0.00010923	5.867e-05	3.839e-05	5.928e-05	3.866e-05	-0.359	-0.5451	1	0.924282	0.663192	-0.379	-0.7385	1	0.945573	0.600801
EEFSEC	NP_068756.2	selenocysteine-specific elongation factor [Homo sapiens]	5.835e-05	1.705e-05	2.176e-05	2.034e-05	3.197e-05	2.346e-05	-0.359	-0.4851	1	0.917855	0.679858	-0.132	-0.2067	1	0.879216	0.764439
NAGK	NP_001317355.1	1 genes:NAGK.NP_001317355.1:N-acetyl-D-glucosamine kinase isoform 2 [Homo sapiens] ;NP_060037.4:N-acetyl-D-glucosamine kinase isoform 1 [Homo sapiens] ;	7.122e-05	7.805e-05	5.311e-05	4.964e-05	9.756e-05	7.157e-05	-0.358	-1.1665	1	0.962814	0.467749	0.092	0.2302	1	0.785731	0.873175
PAWR	NP_002574.2	PRKC apoptosis WT1 regulator protein isoform 1 [Homo sapiens]	0.00019434	0.00011211	9.916e-05	0.00010695	0.00024521	9.595e-05	-0.358	-0.9356	1	0.955063	0.542077	0.028	0.0499	1	0.829467	0.830849
PDIA5	NP_006801.1	protein disulfide-isomerase A5 precursor [Homo sapiens]	5.361e-05	6.365e-05	2.998e-05	6.072e-05	7.344e-05	8.979e-05	-0.358	-0.7981	1	0.946819	0.585915	0.339	1.1075	1	0.524611	0.986068
WDR55	NP_060176.2	WD repeat-containing protein 55 [Homo sapiens]	4.54e-05	3.981e-05	2.708e-05	3.165e-05	4.354e-05	3.65e-05	-0.357	-0.8021	1	0.947767	0.581565	-0.052	-0.1786	1	0.874526	0.771866
TBCD	NP_005984.3	tubulin-specific chaperone D [Homo sapiens]	2.042e-05	8.53e-06	2.176e-05	4.07e-06	1.199e-05	1.564e-05	-0.356	-0.3825	1	0.903412	0.71237	0.019	0.033	1	0.832369	0.827598
NEK7	NP_598001.1	serine/threonine-protein kinase Nek7 [Homo sapiens]	0.00011516	0.00011239	6.297e-05	9.509e-05	0.00011792	0.0001416	-0.355	-0.9952	1	0.958116	0.520136	0.142	0.4646	1	0.721808	0.918331
HDHD2	NP_115500.1	haloacid dehalogenase-like hydrolase domain-containing protein 2 isoform 1 [Homo sapiens]	4.028e-05	3.924e-05	2.003e-05	3.744e-05	5.518e-05	3.599e-05	-0.355	-0.8267	1	0.948704	0.577173	0.087	0.1991	1	0.792321	0.867502
ARID1A	NP_006006.3	AT-rich interactive domain-containing protein 1A isoform a [Homo sapiens]	6.392e-05	3.975e-05	4.313e-05	3.144e-05	4.105e-05	4.148e-05	-0.354	-0.817	1	0.948694	0.577188	-0.217	-0.6107	1	0.933799	0.643712
NSMCE3	NP_619649.1	non-structural maintenance of chromosomes element 3 homolog [Homo sapiens]	0.00014872	5.851e-05	6.825e-05	5.582e-05	7.836e-05	3.066e-05	-0.354	-0.5667	1	0.927295	0.654792	-0.647	-0.9286	1	0.957097	0.539864
KHSRP	NP_001353228.1	1 genes:KHSRP.NP_001353228.1:far upstream element-binding protein 2 isoform 2 [Homo sapiens] ;NP_003676.2:far upstream element-binding protein 2 isoform 1 [Homo sapiens] ;	0.00039572	0.00033677	0.00026385	0.00025313	0.00024235	0.00027138	-0.352	-1.0132	1	0.95865	0.515736	-0.356	-1.0758	1	0.962422	0.492052
NFIX	NP_001257972.1	nuclear factor 1 X-type isoform 1 [Homo sapiens]	0.00011592	5.481e-05	4.577e-05	7.13e-05	4.39e-05	5.4e-05	-0.352	-0.6954	1	0.939265	0.616331	-0.387	-0.37	1	0.904592	0.718041
SNAPIN	NP_036569.1	SNARE-associated protein Snapin [Homo sapiens]	0.000358	0.00016816	0.00013348	0.0002139	0.00024521	0.00011993	-0.352	-0.6921	1	0.939263	0.61634	-0.354	-0.6181	1	0.93511	0.639467
FOXK1	NP_001032242.1	forkhead box protein K1 [Homo sapiens]	7.117e-05	3.2e-05	3.184e-05	3.638e-05	6.175e-05	5.404e-05	-0.352	-0.632	1	0.932942	0.637794	0.228	0.4077	1	0.740348	0.906867
GATAD2B	NP_065750.1	transcriptional repressor p66-beta [Homo sapiens]	8.21e-05	2.571e-05	3.998e-05	2.453e-05	6.285e-05	3.536e-05	-0.351	-0.545	1	0.924282	0.663192	0.04	0.0623	1	0.826534	0.834069
RSL1D1	NP_056474.2	ribosomal L1 domain-containing protein 1 [Homo sapiens]	0.0005465	0.00041488	0.00040224	0.00027211	0.00030627	0.00027106	-0.35	-0.8748	1	0.952106	0.559651	-0.508	-1.5954	0.779497	0.959969	0.328218
EXOC8	NP_787072.2	exocyst complex component 8 [Homo sapiens]	6.716e-05	2.804e-05	3.577e-05	2.675e-05	3.286e-05	2.571e-05	-0.35	-0.6427	1	0.934268	0.633523	-0.358	-0.6352	1	0.936399	0.635198
PLPBP	NP_001336275.1	1 genes:PLPBP.NP_001336275.1:pyridoxal phosphate homeostasis protein isoform 1 [Homo sapiens] ;NP_009129.1:pyridoxal phosphate homeostasis protein isoform 2 [Homo sapiens] ;	0.00010982	4.458e-05	0.00010009	2.552e-05	0.00010866	5.723e-05	-0.35	-0.4114	1	0.907226	0.704346	0.043	0.0632	1	0.826534	0.834069
NUP35	NP_001274513.1	1 genes:NUP35.NP_001274513.1:nucleoporin NUP35 isoform b [Homo sapiens] ;NP_612142.2:nucleoporin NUP35 isoform a [Homo sapiens] ;	0.00013506	0.00010691	5.036e-05	0.00013337	6.167e-05	0.00013574	-0.349	-0.737	1	0.942684	0.603341	-0.299	-0.6675	1	0.940065	0.622371
SLK	NP_001291672.1	STE20-like serine/threonine-protein kinase isoform 2 [Homo sapiens]	4.493e-05	1.548e-05	3.173e-05	1.258e-05	1.583e-05	2.111e-05	-0.349	-0.4203	1	0.909078	0.700311	-0.368	-0.6485	1	0.937654	0.630926
MRI1	NP_001026897.1	1 genes:MRI1.NP_001026897.1:methylthioribose-1-phosphate isomerase isoform 1 [Homo sapiens] ;NP_001316501.1:methylthioribose-1-phosphate isomerase isoform 3 [Homo sapiens] ;	0.00014137	0.00017216	0.00011245	0.00011169	0.00015493	0.00022101	-0.347	-0.989	1	0.957565	0.524508	0.145	0.358	1	0.751189	0.899593
RPL14	NP_003964.3	60S ribosomal protein L14 [Homo sapiens]	0.00080877	0.00052004	0.00038599	0.00054122	0.00045425	0.00052021	-0.347	-0.9296	1	0.955056	0.542086	-0.259	-0.814	1	0.951193	0.57476
BLVRA	NP_000703.2	biliverdin reductase A precursor [Homo sapiens]	0.00032897	0.00015453	0.00016647	0.00014742	0.00012071	0.00018106	-0.347	-0.8271	1	0.948705	0.577173	-0.389	-0.5359	1	0.92673	0.664823
UBASH3B	NP_116262.2	ubiquitin-associated and SH3 domain-containing protein B isoform 1 [Homo sapiens]	8.574e-05	5.09e-05	7.193e-05	2.988e-05	4.037e-05	4.667e-05	-0.347	-0.6553	1	0.935564	0.629241	-0.455	-0.8454	1	0.952838	0.566035
ZNF148	NP_001335362.1	1 genes:ZNF148.NP_001335362.1:zinc finger protein 148 isoform a [Homo sapiens] ;NP_001335363.1:zinc finger protein 148 isoform b [Homo sapiens] ;	7.446e-05	5.441e-05	2.94e-05	7.022e-05	3.9e-05	4.109e-05	-0.347	-0.598	1	0.930181	0.646317	-0.462	-1.3421	0.92546	0.96489	0.407346
FAM208B	NP_001308713.1	protein TASOR 2 isoform 1 [Homo sapiens]	2.86e-06	8.37e-06	2.13e-06	5.99e-06	4.9e-06	2.88e-06	-0.347	-0.481	1	0.916173	0.683969	-0.255	-0.4738	1	0.918868	0.685595
GIT2	NP_001128685.1	ARF GTPase-activating protein GIT2 isoform 6 [Homo sapiens]	4.596e-05	4.851e-05	3.702e-05	2.848e-05	4.597e-05	6.501e-05	-0.346	-1.1102	1	0.961646	0.485123	0.149	0.4837	1	0.718041	0.920518
LSM8	NP_057284.1	LSM8 homolog, U6 small nuclear RNA associated [Homo sapiens]	0.00018113	0.00034411	0.00024313	0.00012626	0.00029776	0.00016991	-0.346	-0.7298	1	0.941583	0.607671	-0.091	-0.1943	1	0.876888	0.768163
CMPK1	NP_001353064.1	UMP-CMP kinase isoform c [Homo sapiens]	0.00099363	0.00028523	0.00051603	0.000235	0.00040106	0.00065386	-0.346	-0.4905	1	0.917858	0.679848	0.029	0.0417	1	0.829467	0.830847
RNPEP	NP_064601.3	aminopeptidase B isoform a [Homo sapiens]	0.00024611	0.00017201	0.00016757	0.00011935	0.00014292	0.00016132	-0.345	-0.9771	1	0.956982	0.528898	-0.277	-0.8823	1	0.955088	0.552962
[truncated: 3,841 more rows]
